# Supplementary material for: Epidemiological trends of hand osteoarthritis from 1990 to 2019: Estimates from the 2019 Global Burden of Disease study
Source: PubMed Central journal article supplement (PMC9790907; doi:10.3389/fmed.2022.922321), 2022-12-12
Supplement: Data_Sheet_1.pdf [file Data_Sheet_1.pdf]

# Epidemiological Trends of Hand Osteoarthritis at the Global, Regional and National Levels: Findings from the 2019 Global Burden of Disease Study

Author names: Junlai Wan<sup>1†</sup>, Xiaoyuan Qian<sup>2†</sup>, Zhiyi He<sup>1</sup>, Ziqing Zhu<sup>1</sup>, Peng Cheng<sup>1\*</sup>, Anmin Chen<sup>1\*</sup>

<sup>1</sup>Author affiliation

Department of Orthopedics, Tongji Hospital, Tongji Medical College, Huazhong University of Science and Technology, Wuhan 430030, China

<sup>2</sup>Author Affiliation

Department of Urology, Tongji Hospital, Tongji Medical College, Huazhong University of Science and Technology, Wuhan 430030, China

\*Correspondence:

Anmin Chen, E-mail: [anminchen@hust.edu.cn](mailto:anminchen@hust.edu.cn)

Address: Department of Orthopedics, Tongji Hospital, 1095 Jiefang Avenue, Wuhan, Hubei Province, China.

Peng Cheng, E-mail: [chengpeng2015@tjh.tjmu.edu.cn](mailto:chengpeng2015@tjh.tjmu.edu.cn)

Address: Department of Orthopedics, Tongji Hospital, 1095 Jiefang Avenue, Wuhan, Hubei Province, China.

† Junlai Wan and Xiaoyuan Qian contributed equally to this work.

### Supplementary Tables

Supplementary Table S1 Three countries with the largest and lowest number of incidence and DALYs.

Supplementary Table S2. Three regions with the largest and lowest number of incidence and DALYs.

Supplementary Table S3. The incident cases and age-standardized incidence rate of hand osteoarthritis in 1990 and 2019, and its temporal trends from 1990 to 2019.

Supplementary Table S4. Age distribution of incidence (per 100,000) for hand osteoarthritis in different countries in 2019.

Supplementary Table S5. The DALYs and age-standardized DALYs rate of hand osteoarthritis in 1990 and 2019, and its temporal trends from 1990 to 2019.

Supplementary Table S6. Age distribution of DALYs rate (per 100,000) for hand osteoarthritis in different countries in 2019.

### Supplementary Figures

Supplementary figure 1. The incident cases (A), age-standardized incidence (B), and age-standardized DALYs (C) rates of hand osteoarthritis between 1990 and 2019 both males and females.

Supplementary figure 2 The proportion of different ages in incidence of hand osteoarthritis by years.

Supplementary figure 3. Distribution of different ages in incidence of hand osteoarthritis in global population.

Supplementary figure 4. Distribution of different ages in incidence of hand osteoarthritis in female subjects.

Supplementary figure 5. Distribution of different ages in incidence of hand osteoarthritis in male subjects.

Supplementary figure 6. The age standardized incidence (A) and DALY (B) rates of hand osteoarthritis per 100,000 population among regions based on SDI in 2019.

Supplementary figure 7. Distribution of different ages in DALYs of hand osteoarthritis in global level.

Supplementary figure 8. Distribution of different ages in DALYs of hand osteoarthritis in females.

Supplementary Figure 9. Distribution of different ages in DALYs of hand osteoarthritis in males.

Supplementary figure 10. The ratio of female to male DALYs among different age groups in global. SDI, socio-demographic index.

Supplementary Tables

Supplementary Table S1 Three countries with the largest and lowest number of incidence and DALYs.

Supplementary Table S1 Three countries with the largest and lowest number of incidence and DALY.

| Measures                      | Top three countries               |                           |                                    | Bottom three countries       |                        |                    |
|-------------------------------|-----------------------------------|---------------------------|------------------------------------|------------------------------|------------------------|--------------------|
| 2019ASR (per 100,000 people)  |                                   |                           |                                    |                              |                        |                    |
| ASIR                          | United States of America<br>281.4 | Iceland 280.51            | Russian Federation<br>268.42       | Maldives 6.65                | Timor-Leste<br>7.05    | Malaysia<br>7.05   |
| Age Standardized DALY<br>Rate | Iceland 179.59                    | Russian Federation<br>178 | United States of<br>America 176.31 | Maldives 3.52                | Timor-Leste<br>3.65    | Malaysia<br>3.66   |
| 1990-2019 increase times      |                                   |                           |                                    |                              |                        |                    |
| Incidence(cases)              | United Arab Emirates<br>918.55    | Qatar 730.65              | Bahrain 496.38                     | Latvia -16.59                | Estonia -4.71          | Bulgaria -<br>4.48 |
| DALY(Year)                    | United Arab Emirates<br>898.62    | Qatar 779.49              | Bahrain 503.57                     | Latvia 1.13                  | Ukraine 5.35           | Bulgaria<br>10.42  |
| EAPC                          |                                   |                           |                                    |                              |                        |                    |
| Incidence                     | Spain 1.80                        | Japan 1.57                | Greece 0.83                        | Russian Federation -<br>1.09 | Saudi Arabia -<br>0.58 | Israel -0.55       |
| DALY                          | Spain 1.88                        | Japan 1.69                | Mexico 0.86                        | Russian Federation -<br>1.11 | Saudi Arabia -<br>0.71 | Israel -0.54       |

ASIR: age-standardized incidence; DALYs: disability adjusted life-years; EAPCs: estimated annual percentage changes.

Supplementary Table S2. Three regions with the largest and lowest number of incidence and DALYs.

Supplementary Table S2 Three regions with the largest and lowest number of incidence and DALYs.

| Measure                                                 | Top three regions                |                                   |                           | Bottom three regions  |                      |                     |
|---------------------------------------------------------|----------------------------------|-----------------------------------|---------------------------|-----------------------|----------------------|---------------------|
| 2019ASR (per 100,000 people)                            |                                  |                                   |                           |                       |                      |                     |
| ASIR                                                    | High-income North America 275.59 | Eastern Europe 215.56             | High SDI 177.1            | Southeast Asia 8.15   | Oceania 16.25        | Caribbean 41.15     |
| Age Standardized DALY Rate                              | High-income North America 173.29 | Eastern Europe 141.05             | High SDI 112.44           | Southeast Asia 4.21   | Oceania 8.72         | Caribbean 24.23     |
| 1990-2019 increase in the number of cases/years (-fold) |                                  |                                   |                           |                       |                      |                     |
| Incidence(cases)                                        | Central Latin America 1.85       | North Africa and Middle East 1.82 | Andean Latin America 1.67 | Eastern Europe 0.07   | Central Europe 0.21  | Western Europe 0.41 |
| DALY(Year)                                              | Central Latin America 2.19       | Andean Latin America 1.93         | East Asia 1.78            | Eastern Europe 0.15   | Central Europe 0.39  | Western Europe 0.53 |
| EAPCs                                                   |                                  |                                   |                           |                       |                      |                     |
| Incidence                                               | High-income Asia Pacific 1.4     | Central Latin America 0.57        | High SDI 0.53             | High-middle SDI -1.01 | Eastern Europe -0.82 | East Asia -0.26     |
| DALY                                                    | High-income Asia Pacific 1.52    | Central Latin America 0.61        | High SDI 0.49             | High-middle SDI -1.07 | Eastern Europe -0.81 | Overall -0.35       |

Supplementary Table S3. The incident cases and age-standardized incidence rate of hand osteoarthritis in 1990 and 2019, and its temporal trends from 1990 to 2019.

Supplementary Table S3. The incident cases and age-standardized incidence rate of Osteoarthritis hand in 1990 and 2019, and its temporal trends from 1990 to 2019.

| Nation              | Sex  | Incident cases No. (95% UI) |                         | change absolute<br>number (%) | ASIR per 100,000 No. (95% UI) |                        | 1990-2019 EAPC No.<br>(95% CI) |
|---------------------|------|-----------------------------|-------------------------|-------------------------------|-------------------------------|------------------------|--------------------------------|
|                     |      | 1990                        | 2019                    |                               | 1990                          | 2019                   |                                |
| Afghanistan         | Both | 37.48 [27.58-50.57]         | 93.96 [67.64-129.25]    | 150.69                        | 48.33 [36.24-64.47]           | 48.05 [36.06-64.16]    | -0.02 [-0.06 to 0.02]          |
| Albania             | Both | 12.82 [9.61-17.27]          | 19.84 [14.88-27.34]     | 54.76                         | 53.11 [40.05-71.93]           | 53.33 [40.1-72.31]     | 0.01 [0.01 to 0.01]            |
| Algeria             | Both | 68.12 [51.49-92.05]         | 195.42 [145.77-262.57]  | 186.88                        | 48.24 [36.18-64.5]            | 47.72 [35.83-63.72]    | -0.04 [-0.05 to -0.04]         |
| American Samoa      | Both | 0.04 [0.03-0.06]            | 0.09 [0.06-0.12]        | 125                           | 16.17 [12.01-21.91]           | 16.46 [12.19-22.42]    | 0.07 [0.06 to 0.08]            |
| Andorra             | Both | 1.32 [1.01-1.71]            | 2.99 [2.18-3.98]        | 126.52                        | 219.56 [164.56-287.21]        | 217.34 [162.73-285.01] | 0.71 [0.46 to 0.96]            |
| Angola              | Both | 46.23 [34.85-60.95]         | 140.11 [105.29-185.37]  | 203.07                        | 81.44 [62.14-106.78]          | 83.05 [63.42-108.91]   | 0.07 [0.07 to 0.07]            |
| Antigua and Barbuda | Both | 0.2 [0.16-0.26]             | 0.46 [0.34-0.61]        | 130                           | 41.66 [31.53-55.23]           | 41.37 [31.32-54.93]    | -0.03 [-0.04 to -0.02]         |
| Argentina           | Both | 509.79 [384.17-673.11]      | 788.57 [595.12-1035.14] | 54.69                         | 159.83 [120.76-211.05]        | 160.15 [121-211.36]    | 0.01 [0 to 0.01]               |
| Armenia             | Both | 30.93 [23.06-41.81]         | 39.51 [29.51-53.3]      | 27.74                         | 102.2 [77.18-135.49]          | 103.01 [77.78-136.86]  | 0.02 [0.02 to 0.03]            |
| Australia           | Both | 291.47 [224.26-383.92]      | 539.18 [408.58-724.89]  | 84.99                         | 160.86 [121.75-214.68]        | 170.1 [128.92-227.38]  | -0.14 [-0.28 to 0]             |
| Austria             | Both | 188.8 [142.99-247.26]       | 263.77 [195.47-352.14]  | 39.71                         | 202.43 [152.85-265.47]        | 202.65 [153.17-266.04] | 0.69 [0.46 to 0.91]            |
| Azerbaijan          | Both | 64.21 [47.32-86.42]         | 136.98 [100.35-182.76]  | 113.33                        | 114.24 [85.73-150.13]         | 113.46 [84.95-149.21]  | 0.31 [0.11 to 0.51]            |
| Bahamas             | Both | 0.75 [0.57-1.01]            | 1.85 [1.38-2.48]        | 146.67                        | 41.65 [31.51-55.2]            | 41.52 [31.44-55.06]    | -0.01 [-0.01 to -0.01]         |
| Bahrain             | Both | 1.38 [1.01-1.84]            | 8.23 [5.98-11.26]       | 496.38                        | 44.28 [33.17-59.23]           | 41.9 [31.37-56.41]     | -0.2 [-0.23 to -0.18]          |
| Bangladesh          | Both | 231.93 [173.83-309.47]      | 610.8 [456.9-820.1]     | 163.36                        | 41.29 [31.17-55.13]           | 42.48 [32.08-56.75]    | 0.11 [0.09 to 0.13]            |
| Barbados            | Both | 1.01 [0.77-1.32]            | 1.8 [1.37-2.39]         | 78.22                         | 41.99 [31.78-55.58]           | 41.54 [31.46-55.1]     | -0.03 [-0.04 to -0.03]         |
| Belarus             | Both | 137.16 [102.76-182.38]      | 153.13 [115.35-203.67]  | 11.64                         | 111.88 [84.86-146.13]         | 111.39 [84.49-145.22]  | 0 [-0.01 to 0]                 |
| Belgium             | Both | 214.95 [160.95-280.22]      | 277.14 [203.82-365.69]  | 28.93                         | 173.4 [130.01-228.03]         | 173.3 [129.9-227.7]    | 0.38 [0.26 to 0.51]            |
| Belize              | Both | 0.4 [0.3-0.53]              | 1.37 [1.02-1.85]        | 242.5                         | 40.25 [30.5-53.63]            | 40.72 [30.88-54.16]    | 0.04 [0.04 to 0.05]            |
| Benin               | Both | 19.84 [15.2-26]             | 56.25 [42.58-74.14]     | 183.52                        | 82.83 [63.13-108.59]          | 82.46 [62.91-108.15]   | -0.01 [-0.02 to -0.01]         |

|                                  |      |                           |                             |        |                        |                        |                        |
|----------------------------------|------|---------------------------|-----------------------------|--------|------------------------|------------------------|------------------------|
| Bermuda                          | Both | 0.27 [0.21-0.36]          | 0.44 [0.33-0.58]            | 62.96  | 41.51 [31.4-55.03]     | 41.1 [31.12-54.54]     | -0.03 [-0.04 to -0.02] |
| Bhutan                           | Both | 1.32 [0.99-1.76]          | 2.7 [2.03-3.6]              | 104.55 | 42.23 [32.06-55.97]    | 41.91 [31.71-55.76]    | -0.03 [-0.04 to -0.01] |
| Bolivia (Plurinational State of) | Both | 22.98 [17.36-30.58]       | 58.81 [44.4-78.49]          | 155.92 | 59.44 [45.18-79.56]    | 58.9 [44.8-78.84]      | -0.03 [-0.03 to -0.02] |
| Bosnia and Herzegovina           | Both | 25.35 [18.75-34.85]       | 27.46 [20.62-37.59]         | 8.32   | 53.63 [40.51-72.74]    | 53.44 [40.28-72.49]    | -0.01 [-0.01 to -0.01] |
| Botswana                         | Both | 7.11 [5.42-9.25]          | 20.04 [15.14-25.87]         | 181.86 | 97.37 [74.63-125.9]    | 97.27 [74.55-126.02]   | 0 [0 to 0.01]          |
| Brazil                           | Both | 476.26 [356.24-634.33]    | 1150.96 [873.7-1526.19]     | 141.67 | 46.23 [35.3-61.2]      | 46.51 [35.53-61.55]    | 0.02 [0.02 to 0.02]    |
| Brunei Darussalam                | Both | 2.52 [1.92-3.31]          | 7.95 [5.97-10.7]            | 215.48 | 157.47 [120-208.89]    | 164.21 [124.75-217.78] | 0.18 [0.16 to 0.2]     |
| Bulgaria                         | Both | 62.03 [46.14-84.55]       | 59.25 [44.62-80.17]         | -4.48  | 53.4 [40.22-72.44]     | 53.46 [40.33-72.5]     | 0 [0 to 0.01]          |
| Burkina Faso                     | Both | 43.53 [33.13-57.24]       | 105.7 [79.91-138.6]         | 142.82 | 83.05 [63.34-108.92]   | 83.27 [63.53-109.17]   | 0.01 [0.01 to 0.01]    |
| Burundi                          | Both | 23.86 [18.3-31.29]        | 53.32 [40.39-70.16]         | 123.47 | 83.25 [63.47-109.09]   | 80.73 [61.58-105.85]   | -0.12 [-0.12 to -0.11] |
| Cabo Verde                       | Both | 1.63 [1.26-2.15]          | 4.13 [3.15-5.44]            | 153.37 | 85.27 [64.92-111.73]   | 82.23 [62.86-107.78]   | -0.13 [-0.15 to -0.12] |
| Cambodia                         | Both | 3.77 [2.64-5.25]          | 9.71 [6.9-13.63]            | 157.56 | 7.58 [5.56-10.22]      | 7.54 [5.54-10.13]      | -0.02 [-0.03 to -0.01] |
| Cameroon                         | Both | 47.58 [36.12-62.68]       | 140.11 [106.29-184.22]      | 194.47 | 82.11 [62.66-107.66]   | 81.94 [62.55-107.43]   | -0.01 [-0.01 to 0]     |
| Canada                           | Both | 672 [507.52-883.37]       | 1132.89 [829-1529.83]       | 68.58  | 225.53 [168.4-298.91]  | 226.8 [169.36-300.5]   | 0.02 [0.02 to 0.02]    |
| Central African Republic         | Both | 13.02 [9.86-17.21]        | 26.93 [20.19-35.61]         | 106.84 | 82.91 [63.29-108.64]   | 82.42 [62.9-108.09]    | -0.03 [-0.03 to -0.02] |
| Chad                             | Both | 26.63 [20.32-34.83]       | 62.95 [47.59-82.82]         | 136.39 | 82.92 [63.18-108.68]   | 81.03 [61.81-106.28]   | -0.09 [-0.1 to -0.08]  |
| Chile                            | Both | 179.83 [136.05-236.66]    | 364.65 [272.13-486.67]      | 102.77 | 160.79 [121.43-212.4]  | 160.2 [121.03-211.62]  | -0.01 [-0.01 to 0]     |
| China                            | Both | 4384.51 [3271.47-5925.27] | 10979.65 [8151.05-14824.96] | 150.42 | 45.66 [34.52-61.37]    | 52.71 [39.69-70.52]    | -0.27 [-0.67 to 0.13]  |
| Colombia                         | Both | 98.02 [73.93-131.82]      | 247.58 [185.56-332.42]      | 152.58 | 46.18 [34.95-61.71]    | 46.74 [35.34-62.46]    | 0.05 [0.04 to 0.05]    |
| Comoros                          | Both | 2.12 [1.61-2.78]          | 4.85 [3.68-6.38]            | 128.77 | 82.24 [62.74-107.85]   | 82.27 [62.85-107.89]   | -0.01 [-0.02 to 0]     |
| Congo                            | Both | 11.01 [8.4-14.47]         | 32.52 [24.34-42.98]         | 195.37 | 83.2 [63.56-109.1]     | 81.58 [62.2-107.04]    | -0.08 [-0.09 to -0.08] |
| Costa Rica                       | Both | 9.06 [6.89-12.13]         | 24.63 [18.46-33.13]         | 171.85 | 46.15 [34.93-61.67]    | 46.66 [35.29-62.36]    | 0.04 [0.04 to 0.04]    |
| Cote d'Ivoire                    | Both | 49.71 [37.55-65.45]       | 132.78 [100.08-174.76]      | 167.11 | 80.32 [61.27-105.3]    | 80.38 [61.33-105.43]   | 0 [-0.01 to 0.01]      |
| Croatia                          | Both | 36.99 [27.25-48.86]       | 35.5 [26.71-48.48]          | -4.03  | 58.35 [43.91-77.1]     | 53.45 [40.28-72.49]    | -0.34 [-0.43 to -0.25] |
| Cuba                             | Both | 41.85 [31.52-55.91]       | 71.32 [53.13-96.23]         | 70.42  | 40.81 [30.91-54.27]    | 41.04 [31.04-54.5]     | 0.02 [0.02 to 0.02]    |
| Cyprus                           | Both | 14.85 [11.27-19.4]        | 32.13 [24.27-41.86]         | 116.36 | 186.93 [139.71-245.76] | 186.33 [139.18-244.68] | 0.45 [0.3 to 0.6]      |

|                                       |      |                         |                          |        |                        |                        |                        |
|---------------------------------------|------|-------------------------|--------------------------|--------|------------------------|------------------------|------------------------|
| Czechia                               | Both | 68.17 [51.35-90.9]      | 87.46 [66.11-117.33]     | 28.3   | 53.68 [40.52-72.85]    | 53.35 [40.21-72.32]    | -0.02 [-0.02 to -0.02] |
| Democratic People's Republic of Korea | Both | 90 [65.84-123.06]       | 157.82 [117.83-216.03]   | 75.36  | 46.28 [34.77-62.19]    | 46.51 [34.93-62.42]    | 0.02 [0.01 to 0.02]    |
| Democratic Republic of the Congo      | Both | 171.55 [130.11-226.62]  | 419.43 [316.96-552.71]   | 144.49 | 83.18 [63.35-109.03]   | 82.31 [62.86-107.93]   | -0.04 [-0.05 to -0.04] |
| Denmark                               | Both | 129.8 [99.73-165.86]    | 147.03 [110.13-196.77]   | 13.27  | 206.04 [158.05-264.71] | 184.8 [138.19-244.75]  | -0.05 [-0.15 to 0.05]  |
| Djibouti                              | Both | 1.91 [1.43-2.51]        | 7.75 [5.81-10.26]        | 305.76 | 80.81 [61.64-105.94]   | 80.15 [61.16-105.16]   | -0.04 [-0.05 to -0.03] |
| Dominica                              | Both | 0.25 [0.19-0.32]        | 0.34 [0.25-0.45]         | 36     | 42.13 [31.79-55.78]    | 40.29 [30.49-53.74]    | -0.17 [-0.2 to -0.14]  |
| Dominican Republic                    | Both | 17.69 [13.33-23.7]      | 41.31 [31.2-55.34]       | 133.52 | 40.91 [31.01-54.37]    | 40.8 [30.88-54.25]     | -0.02 [-0.03 to -0.02] |
| Ecuador                               | Both | 51.22 [38.55-67.81]     | 151.27 [121.87-184.61]   | 195.33 | 80.82 [60.79-106.73]   | 92.4 [74.22-112.66]    | 0.63 [0.51 to 0.75]    |
| Egypt                                 | Both | 175.61 [130.9-236.62]   | 382.55 [284.05-514.86]   | 117.84 | 47.71 [35.83-63.67]    | 46.83 [35.09-62.59]    | -0.06 [-0.07 to -0.06] |
| El Salvador                           | Both | 15.12 [11.43-20.2]      | 27.91 [21.09-37.33]      | 84.59  | 46.65 [35.27-62.33]    | 47.68 [35.95-63.73]    | 0.08 [0.08 to 0.08]    |
| Equatorial Guinea                     | Both | 2.08 [1.58-2.76]        | 6.06 [4.59-7.96]         | 191.35 | 83.73 [63.87-109.8]    | 83.91 [64.02-109.95]   | 0 [-0.02 to 0.02]      |
| Eritrea                               | Both | 12.81 [9.62-16.97]      | 34.29 [25.77-45.24]      | 167.68 | 83.54 [63.82-109.5]    | 82.86 [63.34-108.56]   | -0.03 [-0.04 to -0.02] |
| Estonia                               | Both | 21.43 [16.1-28.24]      | 20.42 [15.6-27.09]       | -4.71  | 112.04 [85.02-146.24]  | 110.1 [83.49-143.48]   | -0.06 [-0.07 to -0.05] |
| Eswatini                              | Both | 4.06 [3.06-5.27]        | 7.77 [5.91-10.04]        | 91.38  | 97.32 [74.69-125.79]   | 97.77 [75.02-126.67]   | 0.02 [0.01 to 0.02]    |
| Ethiopia                              | Both | 231.52 [174.47-304.05]  | 502.37 [378.87-661.38]   | 116.99 | 88.26 [67.06-115.78]   | 88.37 [67.18-115.98]   | 0.02 [0.01 to 0.02]    |
| Fiji                                  | Both | 0.75 [0.54-1.02]        | 1.39 [1-1.94]            | 85.33  | 16.41 [12.19-22.32]    | 16.46 [12.21-22.34]    | 0 [0 to 0.01]          |
| Finland                               | Both | 63.79 [48.76-84.41]     | 78.58 [59.6-105.47]      | 23.19  | 101.32 [76.88-134.49]  | 99.83 [75.8-132.45]    | -0.04 [-0.05 to -0.02] |
| France                                | Both | 857.52 [652.33-1139.54] | 1167.97 [890.54-1571.06] | 36.2   | 127.07 [95.95-168.77]  | 127.29 [96-169.01]     | 0.03 [0.02 to 0.04]    |
| Gabon                                 | Both | 5.04 [3.84-6.62]        | 11.43 [8.65-15.1]        | 126.79 | 82.6 [63.05-108.26]    | 82.29 [62.78-107.87]   | -0.02 [-0.03 to 0]     |
| Gambia                                | Both | 3.9 [2.96-5.12]         | 10.46 [7.93-13.74]       | 168.21 | 80.04 [60.98-105]      | 81.76 [62.33-107.23]   | 0.09 [0.07 to 0.1]     |
| Germany                               | Both | 953.51 [719.36-1276.31] | 1152.29 [881.88-1541.49] | 20.85  | 88.22 [66.51-117.2]    | 87.24 [67.22-115.95]   | -0.03 [-0.04 to -0.03] |
| Ghana                                 | Both | 69.52 [52.84-91.39]     | 184.79 [140-242.2]       | 165.81 | 82.03 [62.61-107.56]   | 83.29 [63.59-109.2]    | 0.06 [0.05 to 0.07]    |
| Greece                                | Both | 77.2 [58.37-104.98]     | 93.82 [70.93-126.92]     | 21.53  | 56.89 [43.36-76.13]    | 56.92 [43.37-76.2]     | 0.83 [0.49 to 1.17]    |
| Greenland                             | Both | 1.11 [0.83-1.46]        | 1.72 [1.23-2.35]         | 54.95  | 213.8 [159.55-283.34]  | 220.88 [165.16-292.93] | 0.13 [0.12 to 0.14]    |
| Grenada                               | Both | 0.25 [0.19-0.33]        | 0.49 [0.36-0.65]         | 96     | 41.78 [31.6-55.37]     | 40.58 [30.67-54.04]    | -0.1 [-0.11 to -0.1]   |
| Guam                                  | Both | 0.15 [0.11-0.21]        | 0.31 [0.23-0.43]         | 106.67 | 16.14 [12.01-21.97]    | 16.31 [12.09-22.07]    | 0.03 [0.02 to 0.05]    |

|                                  |      |                           |                           |        |                        |                        |                        |
|----------------------------------|------|---------------------------|---------------------------|--------|------------------------|------------------------|------------------------|
| Guatemala                        | Both | 20.62 [15.43-27.69]       | 58.41 [44.4-78.28]        | 183.27 | 46.06 [34.82-61.6]     | 47.18 [35.62-63.06]    | 0.09 [0.09 to 0.09]    |
| Guinea                           | Both | 30.95 [23.71-40.47]       | 57.51 [43.83-75.27]       | 85.82  | 82.09 [62.64-107.68]   | 82.2 [62.69-107.79]    | -0.01 [-0.01 to 0]     |
| Guinea-Bissau                    | Both | 4.33 [3.3-5.69]           | 8.79 [6.65-11.56]         | 103    | 82.92 [63.21-108.68]   | 83 [63.36-108.82]      | 0 [0 to 0]             |
| Guyana                           | Both | 1.87 [1.41-2.51]          | 2.98 [2.22-3.99]          | 59.36  | 40.97 [31.02-54.43]    | 41.16 [31.18-54.66]    | 0.01 [0.01 to 0.02]    |
| Haiti                            | Both | 15.86 [11.91-21.23]       | 36.74 [27.42-49.32]       | 131.65 | 40.94 [31.02-54.43]    | 41.5 [31.48-55.05]     | 0.05 [0.04 to 0.05]    |
| Honduras                         | Both | 11.25 [8.5-15.1]          | 32.84 [24.71-44.04]       | 191.91 | 46.17 [34.93-61.7]     | 46.62 [35.26-62.33]    | 0.03 [0.02 to 0.04]    |
| Hungary                          | Both | 72.25 [54.31-97.82]       | 81.12 [60.92-108.76]      | 12.28  | 53.74 [40.53-72.95]    | 53.61 [40.46-72.75]    | -0.01 [-0.01 to -0.01] |
| Iceland                          | Both | 6.82 [5.51-8.46]          | 12.27 [9.22-15.97]        | 79.91  | 277.81 [222.77-348.84] | 280.51 [209.43-363.33] | 0.1 [-0.89 to 1.1]     |
| India                            | Both | 2621.58 [1967.34-3529.07] | 5977.16 [4538.71-8033.57] | 128    | 46.82 [35.72-62.74]    | 47.6 [36.33-63.56]     | 0.06 [0.06 to 0.07]    |
| Indonesia                        | Both | 98.55 [71.28-135.52]      | 214.42 [155.76-296.29]    | 117.57 | 9 [6.79-11.94]         | 9 [6.8-11.92]          | 0 [0 to 0]             |
| Iran (Islamic Republic of)       | Both | 238.34 [180.17-315.18]    | 685.06 [517.4-913.82]     | 187.43 | 73.95 [56.12-97.61]    | 75.64 [57.34-100.02]   | 0.08 [-0.08 to 0.24]   |
| Iraq                             | Both | 44.66 [33.36-59.91]       | 147.57 [109.71-199.54]    | 230.43 | 47.73 [35.85-63.63]    | 47.69 [35.83-63.62]    | 0.01 [0 to 0.01]       |
| Ireland                          | Both | 47.87 [36.51-63.09]       | 88.25 [66.13-117.29]      | 84.35  | 135.71 [102.19-180]    | 136.11 [102.52-180.41] | 0.01 [0.01 to 0.01]    |
| Israel                           | Both | 81.66 [62.29-104.94]      | 182.03 [137.32-236.94]    | 122.91 | 188.36 [140.34-246.45] | 187.87 [140.06-245.73] | -0.55 [-0.8 to -0.3]   |
| Italy                            | Both | 893.11 [678.47-1190.62]   | 1161.61 [876.69-1574.87]  | 30.06  | 119.26 [90.53-158.26]  | 118.29 [89.84-158.04]  | 0.21 [-0.03 to 0.46]   |
| Jamaica                          | Both | 6.74 [5.15-8.89]          | 12.28 [9.32-16.29]        | 82.2   | 41.12 [31.15-54.59]    | 40.89 [31-54.36]       | -0.02 [-0.02 to -0.01] |
| Japan                            | Both | 2117.77 [1608.42-2814.79] | 2827.13 [2168.38-3662.13] | 33.5   | 124.73 [95.67-165.14]  | 144.81 [109.46-188.98] | 1.57 [1.21 to 1.94]    |
| Jordan                           | Both | 8.74 [6.46-11.85]         | 43.57 [32.13-59.28]       | 398.51 | 47.04 [35.43-62.94]    | 46.34 [34.77-61.94]    | -0.05 [-0.07 to -0.02] |
| Kazakhstan                       | Both | 144.9 [108.8-194.57]      | 204.39 [153.13-272.25]    | 41.06  | 103.23 [77.88-137.02]  | 102.79 [77.65-136.47]  | -0.01 [-0.02 to 0]     |
| Kenya                            | Both | 93.44 [70.91-122.38]      | 277.33 [208.86-365.58]    | 196.8  | 88.97 [67.68-116.96]   | 89.12 [67.9-117.09]    | 0 [0 to 0.01]          |
| Kuwait                           | Both | 4.84 [3.49-6.51]          | 22.7 [16.39-31.02]        | 369.01 | 42.2 [31.74-56.69]     | 45.02 [33.83-60.31]    | 0.23 [0.19 to 0.27]    |
| Kyrgyzstan                       | Both | 32.07 [24.33-43.09]       | 58.71 [43.58-78.21]       | 83.07  | 102.44 [77.4-135.94]   | 102.32 [77.32-135.89]  | 0.01 [0 to 0.01]       |
| Lao People's Democratic Republic | Both | 1.62 [1.13-2.27]          | 3.6 [2.53-5]              | 122.22 | 7.33 [5.38-9.81]       | 7.21 [5.29-9.67]       | -0.05 [-0.06 to -0.05] |
| Latvia                           | Both | 37.25 [27.89-49.3]        | 31.07 [23.46-41.37]       | -16.59 | 112.22 [85.15-146.52]  | 110.97 [84.16-144.68]  | -0.03 [-0.04 to -0.03] |
| Lebanon                          | Both | 12.36 [9.21-16.58]        | 26.12 [19.69-34.81]       | 111.33 | 48.22 [36.22-64.38]    | 49.65 [37.22-66.5]     | 0.1 [0.1 to 0.11]      |
| Lesotho                          | Both | 11.08 [8.48-14.42]        | 15.97 [12.2-20.88]        | 44.13  | 97 [74.4-125.46]       | 97.54 [74.83-126.5]    | 0.03 [0.02 to 0.03]    |



|                                  |      |                        |                           |        |                        |                        |                        |
|----------------------------------|------|------------------------|---------------------------|--------|------------------------|------------------------|------------------------|
| Liberia                          | Both | 10.06 [7.7-13.16]      | 25.97 [19.41-34.41]       | 158.15 | 80.74 [61.56-105.89]   | 80.85 [61.64-106.1]    | 0 [0 to 0]             |
| Libya                            | Both | 10.51 [7.81-14.15]     | 33.88 [24.98-45.77]       | 222.36 | 45.71 [34.32-61.16]    | 47.34 [35.51-63.15]    | 0.14 [0.11 to 0.16]    |
| Lithuania                        | Both | 28.8 [21.79-39.07]     | 28.28 [21.32-38.32]       | -1.81  | 66.79 [50.94-89.46]    | 66.16 [50.46-88.6]     | 0.2 [0.05 to 0.34]     |
| Luxembourg                       | Both | 6.57 [4.94-8.76]       | 11.97 [8.92-16.04]        | 82.19  | 135.78 [102.21-180.25] | 135.22 [101.85-179.29] | -0.01 [-0.02 to -0.01] |
| Madagascar                       | Both | 52.12 [39.76-68.3]     | 136.36 [102.4-180.14]     | 161.63 | 81.89 [62.38-107.34]   | 82.06 [62.62-107.59]   | 0.01 [0 to 0.01]       |
| Malawi                           | Both | 41.28 [31.45-54.09]    | 82.48 [62.55-108.21]      | 99.81  | 82.46 [62.96-108.14]   | 82.62 [63.12-108.35]   | 0.02 [0.02 to 0.03]    |
| Malaysia                         | Both | 7.58 [5.35-10.47]      | 20.12 [14.3-27.95]        | 165.44 | 7.14 [5.22-9.62]       | 7.05 [5.16-9.5]        | -0.05 [-0.05 to -0.04] |
| Maldives                         | Both | 0.07 [0.05-0.1]        | 0.26 [0.19-0.36]          | 271.43 | 6.59 [4.79-8.9]        | 6.65 [4.84-8.95]       | 0.06 [0.01 to 0.12]    |
| Mali                             | Both | 41.63 [31.76-54.57]    | 92.38 [70.12-121.29]      | 121.91 | 81.97 [62.52-107.49]   | 81.39 [62.05-106.8]    | -0.03 [-0.04 to -0.03] |
| Malta                            | Both | 5.8 [4.38-7.65]        | 8.49 [6.42-11.41]         | 46.38  | 136.89 [103.02-181.61] | 135.55 [102.07-179.83] | -0.03 [-0.04 to -0.03] |
| Marshall Islands                 | Both | 0.03 [0.02-0.04]       | 0.07 [0.05-0.1]           | 133.33 | 16.28 [12.1-22.05]     | 16.25 [12.08-22.21]    | -0.01 [-0.01 to 0]     |
| Mauritania                       | Both | 9.65 [7.39-12.63]      | 21.19 [16.13-27.92]       | 119.59 | 82.23 [62.76-107.81]   | 82.16 [62.63-107.74]   | 0 [-0.01 to 0.01]      |
| Mauritius                        | Both | 0.58 [0.41-0.8]        | 1.26 [0.91-1.71]          | 117.24 | 7.36 [5.42-9.86]       | 7.29 [5.37-9.77]       | -0.04 [-0.04 to -0.03] |
| Mexico                           | Both | 604.7 [454.24-806.62]  | 1773.52 [1327.86-2369.34] | 193.29 | 115.82 [86.64-153.93]  | 135.26 [101.86-178.7]  | 0.75 [0.6 to 0.91]     |
| Micronesia (Federated States of) | Both | 0.08 [0.06-0.11]       | 0.14 [0.1-0.19]           | 75     | 16.31 [12.13-22.25]    | 16.48 [12.2-22.43]     | 0.03 [0.02 to 0.04]    |
| Mongolia                         | Both | 11.98 [9.09-15.86]     | 34.38 [25.32-46.09]       | 186.98 | 100.46 [75.92-133.27]  | 102.34 [77.3-135.9]    | 0.07 [0.06 to 0.08]    |
| Montenegro                       | Both | 3.5 [2.62-4.79]        | 4.67 [3.5-6.37]           | 33.43  | 53.56 [40.4-72.65]     | 53.41 [40.25-72.43]    | -0.01 [-0.01 to -0.01] |
| Morocco                          | Both | 78.29 [58.64-105.31]   | 177.8 [132.24-238.55]     | 127.1  | 48.27 [36.23-64.42]    | 47.98 [36.04-64.04]    | -0.03 [-0.03 to -0.03] |
| Mozambique                       | Both | 65.49 [49.62-86.4]     | 127.47 [96.28-167.7]      | 94.64  | 82.66 [63.04-108.42]   | 83.15 [63.5-108.99]    | 0.01 [0.01 to 0.02]    |
| Myanmar                          | Both | 18.05 [12.77-25.24]    | 37.21 [26.55-52.2]        | 106.15 | 7.31 [5.38-9.79]       | 7.48 [5.5-10.06]       | 0.08 [0.08 to 0.08]    |
| Namibia                          | Both | 8.01 [6.12-10.36]      | 17.82 [13.5-23.05]        | 122.47 | 96.92 [74.27-125.34]   | 97.53 [74.74-126.26]   | 0.02 [0.02 to 0.03]    |
| Nepal                            | Both | 49.07 [36.4-65.51]     | 107.16 [80.45-143.39]     | 118.38 | 42.19 [31.97-56.22]    | 43.37 [32.86-57.76]    | 0.09 [0.08 to 0.1]     |
| Netherlands                      | Both | 179.99 [147.29-219.56] | 247.03 [187.56-338.38]    | 37.25  | 102.44 [83.7-124.93]   | 97.78 [74.21-130.92]   | -0.31 [-0.57 to -0.05] |
| New Zealand                      | Both | 62.4 [47.7-81.1]       | 108.22 [81.39-144.24]     | 73.43  | 176.12 [133.4-231.2]   | 180.45 [136.38-237.37] | 0.09 [0.08 to 0.09]    |
| Nicaragua                        | Both | 8.62 [6.51-11.62]      | 24.74 [18.5-33.15]        | 187.01 | 46.45 [35.15-62.07]    | 46.84 [35.39-62.57]    | 0.03 [0.03 to 0.04]    |
| Niger                            | Both | 32.47 [24.53-42.78]    | 87.14 [66.11-114.54]      | 168.37 | 80.99 [61.73-106.17]   | 82.49 [62.9-108.1]     | 0.06 [0.05 to 0.06]    |

|                                  |      |                           |                           |        |                        |                        |                        |
|----------------------------------|------|---------------------------|---------------------------|--------|------------------------|------------------------|------------------------|
| Nigeria                          | Both | 459.18 [347.44-602.06]    | 1100.45 [822.1-1453.15]   | 139.66 | 86.2 [65.54-112.95]    | 90.05 [68.57-118.52]   | 0.17 [0.15 to 0.19]    |
| North Macedonia                  | Both | 10.92 [8.2-14.85]         | 16.27 [12.16-22.24]       | 48.99  | 53.32 [40.11-72.32]    | 53.2 [40.06-72.11]     | -0.01 [-0.01 to -0.01] |
| Northern Mariana Islands         | Both | 0.04 [0.03-0.06]          | 0.1 [0.07-0.14]           | 150    | 15.33 [11.42-20.68]    | 16.19 [12.04-22.07]    | 0.17 [0.14 to 0.19]    |
| Norway                           | Both | 94.3 [72.6-121.7]         | 139.02 [106.69-182.8]     | 47.42  | 191.97 [145.86-252.32] | 191.23 [145.29-251.52] | 0.17 [0.08 to 0.26]    |
| Oman                             | Both | 4.61 [3.39-6.17]          | 15.18 [10.93-20.46]       | 229.28 | 43.76 [32.95-58.6]     | 42.55 [31.98-57.01]    | -0.14 [-0.21 to -0.07] |
| Pakistan                         | Both | 297.65 [226.89-399.06]    | 652.1 [487.14-874.3]      | 119.08 | 46.5 [35.49-62.29]     | 47.11 [36.01-62.97]    | 0.04 [0.04 to 0.04]    |
| Palestine                        | Both | 4.88 [3.68-6.56]          | 15.61 [11.61-21.11]       | 219.88 | 49.9 [37.34-66.75]     | 47.73 [35.94-63.72]    | -0.16 [-0.18 to -0.15] |
| Panama                           | Both | 7.64 [5.79-10.22]         | 19.57 [14.68-26.14]       | 156.15 | 45.77 [34.63-61.15]    | 46.07 [34.87-61.56]    | 0.02 [0.02 to 0.02]    |
| Papua New Guinea                 | Both | 3.61 [2.63-4.95]          | 9.93 [7.19-13.66]         | 175.07 | 16.19 [12.06-21.95]    | 16.18 [12.04-21.94]    | -0.01 [-0.01 to 0]     |
| Paraguay                         | Both | 10.21 [7.73-13.7]         | 24.91 [18.8-33.2]         | 143.98 | 40.82 [30.9-54.27]     | 40.8 [30.88-54.27]     | 0 [0 to 0]             |
| Peru                             | Both | 60.53 [45.77-81.18]       | 149.3 [112.31-199.82]     | 146.65 | 43.81 [32.99-58.52]    | 44.15 [33.22-59]       | 0.23 [0.1 to 0.35]     |
| Philippines                      | Both | 30.04 [21.92-41.08]       | 76.31 [55.71-104.4]       | 154.03 | 8.94 [6.74-11.87]      | 9.06 [6.83-11.99]      | 0.06 [0.05 to 0.06]    |
| Poland                           | Both | 252.96 [193.52-336.82]    | 344.27 [261.75-457.21]    | 36.1   | 59.51 [45.37-79.41]    | 59.27 [45.22-79.16]    | -0.01 [-0.02 to -0.01] |
| Portugal                         | Both | 175.43 [132.06-235.3]     | 235.47 [177.11-314.99]    | 34.22  | 145.82 [109.68-195.6]  | 145.57 [109.47-195.24] | 0.18 [0.12 to 0.25]    |
| Puerto Rico                      | Both | 14.74 [11.09-19.61]       | 22.06 [16.58-29.1]        | 49.66  | 41.61 [31.54-55.18]    | 41.66 [31.56-55.22]    | 0 [-0.01 to 0.01]      |
| Qatar                            | Both | 1.24 [0.88-1.71]          | 10.3 [7.29-14.22]         | 730.65 | 39.48 [29.91-52.89]    | 37.63 [28.19-50.68]    | -0.26 [-0.29 to -0.22] |
| Republic of Korea                | Both | 800.58 [603.97-1043.62]   | 1662.25 [1242.33-2193.67] | 107.63 | 200.8 [152.26-260.34]  | 196.59 [149.15-256.03] | 0.58 [0.36 to 0.79]    |
| Republic of Moldova              | Both | 51.25 [38.72-67.49]       | 57.8 [43.55-76.3]         | 12.78  | 111.81 [84.82-145.69]  | 110.87 [84.11-144.5]   | -0.02 [-0.03 to -0.02] |
| Romania                          | Both | 147.58 [110.59-202.7]     | 158.95 [119.82-214.38]    | 7.7    | 53.5 [40.34-72.57]     | 53.46 [40.33-72.51]    | 0 [0 to 0]             |
| Russian Federation               | Both | 4905.24 [3756.42-6358.96] | 5309.17 [4054.88-6801.65] | 8.23   | 287.81 [221.26-368.56] | 268.42 [204.66-347.13] | -1.09 [-1.41 to -0.76] |
| Rwanda                           | Both | 30.07 [23.02-39.51]       | 69.01 [52.59-90.91]       | 129.5  | 83.54 [63.67-109.45]   | 83.69 [63.93-109.68]   | 0.01 [0 to 0.02]       |
| Saint Lucia                      | Both | 0.36 [0.27-0.48]          | 0.92 [0.69-1.23]          | 155.56 | 41.68 [31.54-55.2]     | 40.95 [31.01-54.43]    | -0.06 [-0.07 to -0.06] |
| Saint Vincent and the Grenadines | Both | 0.28 [0.22-0.37]          | 0.55 [0.42-0.73]          | 96.43  | 41.42 [31.33-54.92]    | 40.24 [30.52-53.6]     | -0.1 [-0.11 to -0.09]  |
| Samoa                            | Both | 0.15 [0.11-0.21]          | 0.26 [0.19-0.36]          | 73.33  | 16.42 [12.2-22.32]     | 16.27 [12.06-22.06]    | -0.04 [-0.04 to -0.04] |
| Sao Tome and Principe            | Both | 0.55 [0.42-0.72]          | 1.21 [0.91-1.6]           | 120    | 82.52 [62.94-108.2]    | 81.76 [62.43-107.22]   | -0.04 [-0.05 to -0.03] |
| Saudi Arabia                     | Both | 102.47 [75.85-135.86]     | 427 [311.32-574.16]       | 316.71 | 106.69 [80.45-139.09]  | 107.25 [80.77-139.97]  | -0.58 [-0.81 to -0.34] |

|                      |      |                        |                          |        |                        |                        |                        |
|----------------------|------|------------------------|--------------------------|--------|------------------------|------------------------|------------------------|
| Senegal              | Both | 32.7 [24.96-42.99]     | 78.45 [59.74-103.09]     | 139.91 | 81.98 [62.51-107.48]   | 82.43 [62.88-108.06]   | 0.02 [0.02 to 0.02]    |
| Serbia               | Both | 62.6 [46.43-85.63]     | 67.28 [50.3-91.1]        | 7.48   | 53.43 [40.24-72.49]    | 53.35 [40.18-72.36]    | 0 [0 to 0]             |
| Seychelles           | Both | 0.04 [0.03-0.05]       | 0.08 [0.06-0.12]         | 100    | 7.35 [5.4-9.85]        | 7.14 [5.25-9.55]       | -0.11 [-0.13 to -0.1]  |
| Sierra Leone         | Both | 18.15 [13.87-23.84]    | 39.75 [30.15-52.18]      | 119.01 | 81.59 [62.23-107.01]   | 81.32 [62-106.68]      | -0.02 [-0.03 to -0.01] |
| Singapore            | Both | 50.19 [38.32-66.66]    | 135.41 [102.98-179.06]   | 169.79 | 170.63 [129.63-226.53] | 160.46 [122.17-211.42] | 0.05 [-0.03 to 0.14]   |
| Slovakia             | Both | 30.63 [23.14-41.06]    | 43.21 [32.52-58.32]      | 41.07  | 53.67 [40.45-72.86]    | 53.51 [40.36-72.57]    | -0.01 [-0.01 to -0.01] |
| Slovenia             | Both | 12.8 [9.66-17.34]      | 17.66 [13.33-23.99]      | 37.97  | 53.77 [40.66-72.94]    | 53.28 [40.13-72.22]    | -0.03 [-0.03 to -0.03] |
| Solomon Islands      | Both | 0.26 [0.19-0.36]       | 0.64 [0.46-0.88]         | 146.15 | 15.97 [11.91-21.75]    | 16.27 [12.08-22.15]    | 0.06 [0.06 to 0.06]    |
| Somalia              | Both | 33.51 [25.12-44.23]    | 85.48 [63.85-112.91]     | 155.09 | 82.37 [62.9-108]       | 83.06 [63.51-108.85]   | 0.03 [0.02 to 0.04]    |
| South Africa         | Both | 262.89 [199.31-340.92] | 557.28 [421.01-726.49]   | 111.98 | 104.92 [80.12-137.24]  | 104.92 [80.12-137.23]  | 0 [0 to 0.01]          |
| South Sudan          | Both | 24.05 [18.34-31.58]    | 46.6 [34.8-61.71]        | 93.76  | 79.4 [60.61-104.14]    | 81.47 [62.15-106.89]   | 0.09 [0.08 to 0.09]    |
| Spain                | Both | 580.28 [440.11-764.05] | 1202.84 [742.64-1959.33] | 107.29 | 127.62 [96.91-167.26]  | 168.99 [105.07-275.48] | 1.8 [1.42 to 2.19]     |
| Sri Lanka            | Both | 8.56 [6.02-11.89]      | 18.63 [13.45-25.48]      | 117.64 | 7.09 [5.18-9.53]       | 7.39 [5.44-9.92]       | 0.15 [0.14 to 0.16]    |
| Sudan                | Both | 52.61 [39.24-70.76]    | 119.58 [88.69-160.55]    | 127.3  | 47.44 [35.64-63.39]    | 47.11 [35.41-63.03]    | -0.04 [-0.05 to -0.02] |
| Suriname             | Both | 1.19 [0.89-1.59]       | 2.66 [1.99-3.54]         | 123.53 | 41.09 [31.1-54.66]     | 41.16 [31.16-54.67]    | 0 [-0.01 to 0]         |
| Sweden               | Both | 92 [69.91-121.95]      | 116.65 [88.39-155.42]    | 26.79  | 80.22 [60.97-106.88]   | 79.55 [60.5-105.9]     | -0.24 [-0.65 to 0.17]  |
| Switzerland          | Both | 116.91 [88.21-154.95]  | 175.26 [130.69-235.47]   | 49.91  | 136.04 [102.41-180.54] | 135.6 [102.14-179.85]  | -0.01 [-0.01 to -0.01] |
| Syrian Arab Republic | Both | 30.54 [22.89-41.04]    | 73 [53.67-98.79]         | 139.03 | 47.37 [35.55-63.26]    | 47.85 [35.96-63.88]    | 0.02 [0 to 0.04]       |
| Tajikistan           | Both | 30.47 [23.12-40.82]    | 74.26 [54.84-99.01]      | 143.72 | 100.67 [76.18-133.53]  | 100.93 [76.23-134.02]  | 0.03 [0.02 to 0.03]    |
| Thailand             | Both | 28.71 [20.46-39.61]    | 74.72 [54.38-101.59]     | 160.26 | 7.16 [5.36-9.73]       | 7.31 [5.37-9.82]       | 0.1 [0.08 to 0.12]     |
| Timor-Leste          | Both | 0.26 [0.18-0.36]       | 0.59 [0.42-0.81]         | 126.92 | 7.05 [5.17-9.47]       | 7.05 [5.18-9.51]       | 0.01 [0 to 0.01]       |
| Togo                 | Both | 14.63 [11.1-19.23]     | 44.65 [33.68-58.86]      | 205.19 | 83 [63.31-108.82]      | 83.2 [63.5-109.14]     | 0 [0 to 0.01]          |
| Tonga                | Both | 0.1 [0.07-0.14]        | 0.14 [0.1-0.19]          | 40     | 16.62 [12.32-22.62]    | 16.58 [12.28-22.46]    | -0.02 [-0.02 to -0.01] |
| Trinidad and Tobago  | Both | 3.7 [2.81-4.95]        | 7.36 [5.56-9.74]         | 98.92  | 40.96 [31-54.41]       | 40.73 [30.84-54.16]    | -0.02 [-0.02 to -0.01] |
| Tunisia              | Both | 27.07 [20.4-36.37]     | 65.86 [49.26-88.21]      | 143.3  | 47.84 [35.91-63.84]    | 48.23 [36.23-64.33]    | 0.03 [0.02 to 0.03]    |
| Turkey               | Both | 58.99 [43.61-79.68]    | 135.78 [101.05-183.8]    | 130.17 | 14.51 [10.82-19.61]    | 14.52 [10.83-19.63]    | -0.13 [-0.3 to 0.05]   |

|                              |      |                         |                             |        |                        |                        |                        |
|------------------------------|------|-------------------------|-----------------------------|--------|------------------------|------------------------|------------------------|
| Turkmenistan                 | Both | 16.18 [12.94-21.06]     | 39.1 [29-52.44]             | 141.66 | 74.31 [59.73-95.34]    | 80.24 [60.74-107.03]   | 0.3 [0.22 to 0.39]     |
| Uganda                       | Both | 66.97 [51.19-88.18]     | 166.9 [126.52-219.1]        | 149.22 | 82.04 [62.61-107.56]   | 83.14 [63.49-109]      | 0.04 [0.03 to 0.05]    |
| Ukraine                      | Both | 622.48 [473.35-846.66]  | 613.68 [467.86-825.64]      | -1.41  | 93.66 [71.95-123.94]   | 93.56 [71.72-123.95]   | 0.24 [0.09 to 0.4]     |
| United Arab Emirates         | Both | 4.69 [3.31-6.44]        | 47.77 [33.36-66.36]         | 918.55 | 39.56 [29.79-53.03]    | 37.63 [28.32-50.63]    | -0.13 [-0.15 to -0.1]  |
| United Kingdom               | Both | 923.63 [710.53-1226.57] | 1239.8 [948.48-1681.29]     | 34.23  | 129.59 [98.49-172.1]   | 133.38 [101.72-177.72] | -0.06 [-0.39 to 0.27]  |
| United Republic of Tanzania  | Both | 110.62 [84.61-144.98]   | 277.96 [210.18-365.33]      | 151.27 | 82.37 [62.82-107.96]   | 82.38 [62.86-108]      | -0.01 [-0.01 to 0]     |
| United States of America     | Both | 6686.83 [5209.1-8522.8] | 12177.84 [9172.32-16019.87] | 82.12  | 247.51 [189.48-318.79] | 281.4 [216.27-364.83]  | 0.5 [0.22 to 0.79]     |
| United States Virgin Islands | Both | 0.43 [0.32-0.58]        | 0.64 [0.48-0.85]            | 48.84  | 41.42 [31.4-54.97]     | 41.71 [31.58-55.3]     | 0.02 [0.02 to 0.02]    |
| Uruguay                      | Both | 53.59 [40.52-71.13]     | 66.67 [50.59-88.26]         | 24.41  | 160.45 [121.21-211.77] | 161.01 [121.62-212.49] | 0.01 [0.01 to 0.01]    |
| Uzbekistan                   | Both | 126.33 [96.01-170.18]   | 309.56 [228.37-413.05]      | 145.04 | 101.61 [76.73-134.79]  | 101.94 [77.04-135.39]  | 0.02 [0.02 to 0.03]    |
| Vanuatu                      | Both | 0.12 [0.09-0.17]        | 0.31 [0.23-0.43]            | 158.33 | 15.96 [11.9-21.66]     | 16.19 [12.06-22.01]    | 0.06 [0.05 to 0.07]    |
| Venezuela                    | Both | 22.74 [16.8-31.07]      | 63.03 [47.03-86.08]         | 177.18 | 20.36 [15.24-27.73]    | 20.4 [15.28-27.78]     | -0.03 [-0.05 to -0.01] |
| VietNam                      | Both | 30.93 [22.1-42.45]      | 75.16 [53.78-104.66]        | 143    | 7.57 [5.56-10.13]      | 7.44 [5.49-9.95]       | -0.07 [-0.07 to -0.07] |
| Yemen                        | Both | 30.15 [22.48-40.42]     | 87.8 [65.24-117.02]         | 191.21 | 47.5 [35.81-63.4]      | 48.06 [36.03-64.14]    | 0.05 [0.04 to 0.05]    |
| Zambia                       | Both | 31.43 [23.87-41.52]     | 82.71 [62.15-109.2]         | 163.16 | 81.68 [62.26-107.04]   | 81.64 [62.31-107.12]   | 0 [-0.01 to 0.01]      |
| Zimbabwe                     | Both | 51.64 [39.46-67.29]     | 97.24 [73.24-125.94]        | 88.3   | 96.45 [73.96-124.71]   | 97.74 [74.9-126.64]    | 0.05 [0.04 to 0.06]    |
| Afghanistan                  | Male | 10.76 [7.8-15.05]       | 29.13 [20.13-41.57]         | 170.72 | 29 [21.46-39.78]       | 29 [21.46-39.78]       | 0 [0 to 0]             |
| Albania                      | Male | 6.14 [4.52-8.38]        | 8.52 [6.31-11.78]           | 38.76  | 48.07 [35.92-65.22]    | 48.07 [35.92-65.22]    | 0 [0 to 0]             |
| Algeria                      | Male | 20.26 [14.84-27.8]      | 59.81 [43.74-82.09]         | 195.21 | 29 [21.46-39.78]       | 29 [21.46-39.78]       | 0 [0 to 0]             |
| American Samoa               | Male | 0.02 [0.01-0.02]        | 0.03 [0.02-0.04]            | 50     | 11.63 [8.56-15.76]     | 11.63 [8.56-15.76]     | 0 [0 to 0]             |
| Andorra                      | Male | 0.87 [0.66-1.12]        | 1.92 [1.39-2.56]            | 120.69 | 269.38 [200.55-351.69] | 269.38 [200.55-351.69] | 1.13 [0.76 to 1.5]     |
| Angola                       | Male | 18.58 [13.96-24.73]     | 50.73 [38.01-67.38]         | 173.04 | 63.23 [48.09-83.63]    | 63.23 [48.09-83.63]    | 0 [0 to 0]             |
| Antigua and Barbuda          | Male | 0.06 [0.04-0.08]        | 0.14 [0.1-0.19]             | 133.33 | 26.98 [20.13-36.38]    | 26.98 [20.13-36.38]    | 0 [0 to 0]             |
| Argentina                    | Male | 127.13 [95.34-171.99]   | 196.49 [148.56-264.84]      | 54.56  | 83.05 [62.52-112.17]   | 83.05 [62.52-112.17]   | 0 [0 to 0]             |
| Armenia                      | Male | 9.27 [6.93-12.63]       | 11.46 [8.62-15.38]          | 23.62  | 65.64 [49.82-87.15]    | 65.64 [49.82-87.15]    | 0 [0 to 0]             |
| Australia                    | Male | 75.28 [57.03-100.91]    | 133.09 [100.83-181.44]      | 76.79  | 83.05 [62.52-112.17]   | 83.05 [62.52-112.17]   | 0 [0 to 0]             |

|                                  |      |                       |                        |        |                        |                        |                     |
|----------------------------------|------|-----------------------|------------------------|--------|------------------------|------------------------|---------------------|
| Austria                          | Male | 108.61 [81.72-141.75] | 155.49 [114.37-207.29] | 43.16  | 243.74 [183.93-316.09] | 243.74 [183.93-316.09] | 1.09 [0.73 to 1.45] |
| Azerbaijan                       | Male | 14.96 [11-20.58]      | 32.57 [23.91-44.35]    | 117.71 | 58.13 [43.59-78.19]    | 58.13 [43.59-78.19]    | 0.35 [0.13 to 0.58] |
| Bahamas                          | Male | 0.23 [0.17-0.31]      | 0.56 [0.41-0.77]       | 143.48 | 26.98 [20.13-36.38]    | 26.98 [20.13-36.38]    | 0 [0 to 0]          |
| Bahrain                          | Male | 0.6 [0.42-0.83]       | 3.92 [2.76-5.5]        | 553.33 | 29 [21.46-39.78]       | 29 [21.46-39.78]       | 0 [0 to 0]          |
| Bangladesh                       | Male | 87.85 [63.94-117.73]  | 206.57 [151.67-283.12] | 135.14 | 28.81 [21.3-39.3]      | 28.81 [21.3-39.3]      | 0 [0 to 0]          |
| Barbados                         | Male | 0.29 [0.22-0.39]      | 0.54 [0.4-0.74]        | 86.21  | 26.98 [20.13-36.38]    | 26.98 [20.13-36.38]    | 0 [0 to 0]          |
| Belarus                          | Male | 41.11 [30.89-55.23]   | 46.63 [34.86-62.06]    | 13.43  | 76.3 [57.89-101.15]    | 76.3 [57.89-101.15]    | 0 [0 to 0]          |
| Belgium                          | Male | 112.6 [83.53-146.52]  | 146.07 [107.25-192.83] | 29.72  | 185.04 [137.94-241.65] | 185.04 [137.94-241.65] | 0.69 [0.47 to 0.92] |
| Belize                           | Male | 0.14 [0.1-0.19]       | 0.45 [0.33-0.61]       | 221.43 | 26.98 [20.13-36.38]    | 26.98 [20.13-36.38]    | 0 [0 to 0]          |
| Benin                            | Male | 7.14 [5.49-9.48]      | 20.97 [15.81-27.73]    | 193.7  | 63.23 [48.09-83.63]    | 63.23 [48.09-83.63]    | 0 [0 to 0]          |
| Bermuda                          | Male | 0.08 [0.06-0.11]      | 0.14 [0.1-0.19]        | 75     | 26.98 [20.13-36.38]    | 26.98 [20.13-36.38]    | 0 [0 to 0]          |
| Bhutan                           | Male | 0.47 [0.34-0.64]      | 0.97 [0.71-1.31]       | 106.38 | 28.81 [21.3-39.3]      | 28.81 [21.3-39.3]      | 0 [0 to 0]          |
| Bolivia (Plurinational State of) | Male | 5.98 [4.43-8.15]      | 15.76 [11.67-21.53]    | 163.55 | 32.38 [23.91-43.67]    | 32.38 [23.91-43.67]    | 0 [0 to 0]          |
| Bosnia and Herzegovina           | Male | 10.92 [7.96-14.87]    | 11.69 [8.69-15.97]     | 7.05   | 48.07 [35.92-65.22]    | 48.07 [35.92-65.22]    | 0 [0 to 0]          |
| Botswana                         | Male | 2.83 [2.15-3.71]      | 8.36 [6.28-11]         | 195.41 | 82.01 [62.18-108.33]   | 82.01 [62.18-108.33]   | 0 [0 to 0]          |
| Brazil                           | Male | 151.58 [111.42-204.5] | 353.97 [261.89-481.39] | 133.52 | 30.61 [22.83-41.03]    | 30.61 [22.83-41.03]    | 0 [0 to 0]          |
| Brunei Darussalam                | Male | 0.4 [0.3-0.54]        | 1.16 [0.86-1.56]       | 190    | 52.77 [40.02-71.34]    | 52.77 [40.02-71.34]    | 0 [0 to 0]          |
| Bulgaria                         | Male | 26.72 [19.87-36.32]   | 24.99 [18.45-33.72]    | -6.47  | 48.07 [35.92-65.22]    | 48.07 [35.92-65.22]    | 0 [0 to 0]          |
| Burkina Faso                     | Male | 15.26 [11.59-20.34]   | 37.41 [28.26-49.52]    | 145.15 | 63.23 [48.09-83.63]    | 63.23 [48.09-83.63]    | 0 [0 to 0]          |
| Burundi                          | Male | 8.53 [6.51-11.26]     | 22.23 [16.76-29.45]    | 160.61 | 63.23 [48.09-83.63]    | 63.23 [48.09-83.63]    | 0 [0 to 0]          |
| Cabo Verde                       | Male | 0.49 [0.38-0.65]      | 1.6 [1.2-2.12]         | 226.53 | 63.23 [48.09-83.63]    | 63.23 [48.09-83.63]    | 0 [0 to 0]          |
| Cambodia                         | Male | 0.81 [0.53-1.17]      | 2.18 [1.42-3.13]       | 169.14 | 3.82 [2.6-5.38]        | 3.82 [2.6-5.38]        | 0 [0 to 0]          |
| Cameroon                         | Male | 18.06 [13.7-23.99]    | 54.41 [41.09-71.76]    | 201.27 | 63.23 [48.09-83.63]    | 63.23 [48.09-83.63]    | 0 [0 to 0]          |
| Canada                           | Male | 240.19 [182-319.62]   | 413.42 [300.71-567.97] | 72.12  | 162.77 [121.3-219.16]  | 162.77 [121.3-219.16]  | 0 [0 to 0]          |
| Central African Republic         | Male | 4.76 [3.58-6.31]      | 10.33 [7.66-13.82]     | 117.02 | 63.23 [48.09-83.63]    | 63.23 [48.09-83.63]    | 0 [0 to 0]          |
| Chad                             | Male | 9.51 [7.29-12.62]     | 24.97 [18.92-33.13]    | 162.57 | 63.23 [48.09-83.63]    | 63.23 [48.09-83.63]    | 0 [0 to 0]          |

|                                       |      |                           |                           |        |                        |                        |                        |
|---------------------------------------|------|---------------------------|---------------------------|--------|------------------------|------------------------|------------------------|
| Chile                                 | Male | 43.49 [32.7-58.09]        | 91.29 [68.24-124.95]      | 109.91 | 83.05 [62.52-112.17]   | 83.05 [62.52-112.17]   | 0 [0 to 0]             |
| China                                 | Male | 2215.64 [1639.56-3049.93] | 5588.29 [4123.26-7743.92] | 152.22 | 45.13 [33.7-61.13]     | 53.18 [39.92-72.42]    | -0.96 [-1.63 to -0.29] |
| Colombia                              | Male | 36.7 [27.4-49.61]         | 86.04 [64.53-116.48]      | 134.44 | 34.92 [26.18-47.08]    | 34.92 [26.18-47.08]    | 0 [0 to 0]             |
| Comoros                               | Male | 0.79 [0.6-1.05]           | 1.85 [1.4-2.46]           | 134.18 | 63.23 [48.09-83.63]    | 63.23 [48.09-83.63]    | 0 [0 to 0]             |
| Congo                                 | Male | 3.95 [2.99-5.26]          | 12.98 [9.64-17.34]        | 228.61 | 63.23 [48.09-83.63]    | 63.23 [48.09-83.63]    | 0 [0 to 0]             |
| Costa Rica                            | Male | 3.4 [2.54-4.59]           | 8.64 [6.47-11.74]         | 154.12 | 34.92 [26.18-47.08]    | 34.92 [26.18-47.08]    | 0 [0 to 0]             |
| Cote d'Ivoire                         | Male | 21.31 [16.03-28.12]       | 57 [42.61-75.76]          | 167.48 | 63.23 [48.09-83.63]    | 63.23 [48.09-83.63]    | 0 [0 to 0]             |
| Croatia                               | Male | 16.01 [11.74-21.5]        | 14.93 [11.14-20.34]       | -6.75  | 53.93 [40.09-71.23]    | 48.07 [35.92-65.22]    | -0.45 [-0.57 to -0.32] |
| Cuba                                  | Male | 13.71 [10.24-18.61]       | 22.56 [16.66-30.93]       | 64.55  | 26.98 [20.13-36.38]    | 26.98 [20.13-36.38]    | 0 [0 to 0]             |
| Cyprus                                | Male | 8.27 [6.21-10.76]         | 17.56 [13.27-22.8]        | 112.33 | 213.52 [159.56-279.01] | 213.52 [159.56-279.01] | 0.81 [0.54 to 1.07]    |
| Czechia                               | Male | 28.29 [20.97-37.76]       | 37.88 [28.28-50.92]       | 33.9   | 48.07 [35.92-65.22]    | 48.07 [35.92-65.22]    | 0 [0 to 0]             |
| Democratic People's Republic of Korea | Male | 40.56 [29.41-56.57]       | 76.85 [56.39-106.17]      | 89.47  | 47.32 [35.44-64.81]    | 47.32 [35.44-64.81]    | 0 [0 to 0]             |
| Democratic Republic of the Congo      | Male | 60.76 [46.12-80.94]       | 161.98 [121.82-215.12]    | 166.59 | 63.23 [48.09-83.63]    | 63.23 [48.09-83.63]    | 0 [0 to 0]             |
| Denmark                               | Male | 54.65 [40.88-70.76]       | 62 [46.38-82.83]          | 13.45  | 176.52 [132.22-228.89] | 155.62 [117.38-204.18] | 0.24 [0.05 to 0.43]    |
| Djibouti                              | Male | 0.81 [0.6-1.07]           | 3.29 [2.46-4.39]          | 306.17 | 63.23 [48.09-83.63]    | 63.23 [48.09-83.63]    | 0 [0 to 0]             |
| Dominica                              | Male | 0.07 [0.05-0.09]          | 0.12 [0.09-0.16]          | 71.43  | 26.98 [20.13-36.38]    | 26.98 [20.13-36.38]    | 0 [0 to 0]             |
| Dominican Republic                    | Male | 5.73 [4.24-7.83]          | 13.53 [10.07-18.46]       | 136.13 | 26.98 [20.13-36.38]    | 26.98 [20.13-36.38]    | 0 [0 to 0]             |
| Ecuador                               | Male | 11.75 [8.75-16.03]        | 32.27 [25.09-42.06]       | 174.64 | 37.81 [28.34-51.2]     | 40.83 [31.68-53.49]    | 0.37 [0.29 to 0.44]    |
| Egypt                                 | Male | 54.11 [39.39-74.16]       | 124.08 [91.02-170.46]     | 129.31 | 29 [21.46-39.78]       | 29 [21.46-39.78]       | 0 [0 to 0]             |
| El Salvador                           | Male | 5.35 [4.02-7.2]           | 8.67 [6.53-11.68]         | 62.06  | 34.92 [26.18-47.08]    | 34.92 [26.18-47.08]    | 0 [0 to 0]             |
| Equatorial Guinea                     | Male | 0.71 [0.53-0.95]          | 2.15 [1.61-2.84]          | 202.82 | 63.23 [48.09-83.63]    | 63.23 [48.09-83.63]    | 0 [0 to 0]             |
| Eritrea                               | Male | 4.62 [3.45-6.17]          | 13.09 [9.73-17.52]        | 183.33 | 63.23 [48.09-83.63]    | 63.23 [48.09-83.63]    | 0 [0 to 0]             |
| Estonia                               | Male | 6.4 [4.81-8.54]           | 6.5 [4.9-8.62]            | 1.56   | 76.3 [57.89-101.15]    | 76.3 [57.89-101.15]    | 0 [0 to 0]             |
| Eswatini                              | Male | 1.62 [1.22-2.14]          | 3.13 [2.36-4.12]          | 93.21  | 82.01 [62.18-108.33]   | 82.01 [62.18-108.33]   | 0 [0 to 0]             |
| Ethiopia                              | Male | 92.6 [69.39-123.55]       | 200.01 [150.22-263.96]    | 115.99 | 68.95 [51.83-90.95]    | 68.95 [51.83-90.95]    | 0 [0 to 0]             |
| Fiji                                  | Male | 0.26 [0.18-0.36]          | 0.48 [0.33-0.68]          | 84.62  | 11.63 [8.56-15.76]     | 11.63 [8.56-15.76]     | 0 [0 to 0]             |

|                            |      |                        |                           |        |                        |                        |                        |
|----------------------------|------|------------------------|---------------------------|--------|------------------------|------------------------|------------------------|
| Finland                    | Male | 12.71 [9.53-17.1]      | 17.51 [12.97-23.71]       | 37.77  | 42.76 [32.03-57.53]    | 42.76 [32.03-57.53]    | 0 [0 to 0]             |
| France                     | Male | 301.13 [230.35-405.54] | 411.07 [314.51-563.12]    | 36.51  | 91.83 [70.25-123.6]    | 91.83 [70.25-123.6]    | 0.05 [0.04 to 0.07]    |
| Gabon                      | Male | 1.89 [1.44-2.51]       | 4.3 [3.24-5.71]           | 127.51 | 63.23 [48.09-83.63]    | 63.23 [48.09-83.63]    | 0 [0 to 0]             |
| Gambia                     | Male | 1.68 [1.27-2.23]       | 4.06 [3.08-5.37]          | 141.67 | 63.23 [48.09-83.63]    | 63.23 [48.09-83.63]    | 0 [0 to 0]             |
| Germany                    | Male | 244.15 [181.6-332.3]   | 318.34 [239.1-428.97]     | 30.39  | 47.79 [36.18-64.08]    | 47.68 [36.27-63.49]    | -0.01 [-0.01 to -0.01] |
| Ghana                      | Male | 26.76 [20.15-35.59]    | 65.93 [49.54-87.4]        | 146.38 | 63.23 [48.09-83.63]    | 63.23 [48.09-83.63]    | 0 [0 to 0]             |
| Greece                     | Male | 22.8 [16.86-31.71]     | 27.7 [20.69-38.21]        | 21.49  | 34.57 [25.76-47.75]    | 34.57 [25.76-47.75]    | 1.2 [0.7 to 1.69]      |
| Greenland                  | Male | 0.47 [0.35-0.62]       | 0.7 [0.49-0.98]           | 48.94  | 162.77 [121.3-219.16]  | 162.77 [121.3-219.16]  | 0 [0 to 0]             |
| Grenada                    | Male | 0.07 [0.06-0.1]        | 0.16 [0.12-0.22]          | 128.57 | 26.98 [20.13-36.38]    | 26.98 [20.13-36.38]    | 0 [0 to 0]             |
| Guam                       | Male | 0.06 [0.04-0.08]       | 0.11 [0.08-0.16]          | 83.33  | 11.63 [8.56-15.76]     | 11.63 [8.56-15.76]     | 0 [0 to 0]             |
| Guatemala                  | Male | 7.73 [5.77-10.46]      | 19.48 [14.66-26.31]       | 152.01 | 34.92 [26.18-47.08]    | 34.92 [26.18-47.08]    | 0 [0 to 0]             |
| Guinea                     | Male | 11.59 [8.84-15.42]     | 21.22 [16.22-28.2]        | 83.09  | 63.23 [48.09-83.63]    | 63.23 [48.09-83.63]    | 0 [0 to 0]             |
| Guinea-Bissau              | Male | 1.54 [1.18-2.05]       | 3.18 [2.4-4.19]           | 106.49 | 63.23 [48.09-83.63]    | 63.23 [48.09-83.63]    | 0 [0 to 0]             |
| Guyana                     | Male | 0.61 [0.45-0.82]       | 0.94 [0.69-1.29]          | 54.1   | 26.98 [20.13-36.38]    | 26.98 [20.13-36.38]    | 0 [0 to 0]             |
| Haiti                      | Male | 5.13 [3.78-7.02]       | 11.19 [8.24-15.33]        | 118.13 | 26.98 [20.13-36.38]    | 26.98 [20.13-36.38]    | 0 [0 to 0]             |
| Honduras                   | Male | 4.21 [3.15-5.69]       | 11.61 [8.69-15.72]        | 175.77 | 34.92 [26.18-47.08]    | 34.92 [26.18-47.08]    | 0 [0 to 0]             |
| Hungary                    | Male | 29.34 [21.68-39.58]    | 33.23 [24.72-44.52]       | 13.26  | 48.07 [35.92-65.22]    | 48.07 [35.92-65.22]    | 0 [0 to 0]             |
| Iceland                    | Male | 3.22 [2.6-3.93]        | 5.65 [4.14-7.47]          | 75.47  | 261.06 [209.13-321.77] | 253.57 [185.28-331.57] | -0.11 [-1.19 to 0.98]  |
| India                      | Male | 951.8 [698.63-1303.99] | 2035.78 [1502.27-2780.61] | 113.89 | 32.45 [24.35-42.85]    | 32.45 [24.35-42.85]    | 0 [0 to 0]             |
| Indonesia                  | Male | 27.31 [17.74-39.12]    | 59.42 [38.56-85.85]       | 117.58 | 5.09 [3.46-7]          | 5.09 [3.46-7]          | 0 [0 to 0]             |
| Iran (Islamic Republic of) | Male | 64.32 [48.01-86.68]    | 177.58 [132.29-238.16]    | 176.09 | 38.73 [29.34-51.86]    | 38.97 [29.45-52.04]    | -0.02 [-0.13 to 0.09]  |
| Iraq                       | Male | 13.92 [10.14-18.99]    | 45.84 [33.19-63.24]       | 229.31 | 29 [21.46-39.78]       | 29 [21.46-39.78]       | 0 [0 to 0]             |
| Ireland                    | Male | 19.32 [14.6-25.74]     | 35.21 [26.31-47.11]       | 82.25  | 110.27 [82.68-146.57]  | 110.27 [82.68-146.57]  | 0 [0 to 0]             |
| Israel                     | Male | 33.48 [25.31-43.46]    | 76.52 [57.72-100.18]      | 128.55 | 161.51 [120.46-213.24] | 161.51 [120.46-213.24] | -0.67 [-0.98 to -0.36] |
| Italy                      | Male | 326.54 [245.33-441.7]  | 409.07 [307.66-557.86]    | 25.27  | 91.78 [69.24-122.14]   | 86.34 [65.24-115.92]   | 0.09 [-0.19 to 0.38]   |
| Jamaica                    | Male | 2.13 [1.59-2.9]        | 3.96 [2.96-5.4]           | 85.92  | 26.98 [20.13-36.38]    | 26.98 [20.13-36.38]    | 0 [0 to 0]             |

|                                  |      |                        |                        |        |                       |                       |                        |
|----------------------------------|------|------------------------|------------------------|--------|-----------------------|-----------------------|------------------------|
| Japan                            | Male | 425.11 [316.62-577.64] | 574.42 [431.16-776.53] | 35.12  | 52.9 [39.91-71.31]    | 52.88 [39.9-71.28]    | -0.13 [-0.18 to -0.08] |
| Jordan                           | Male | 2.82 [2.03-3.91]       | 14.89 [10.7-20.69]     | 428.01 | 29 [21.46-39.78]      | 29 [21.46-39.78]      | 0 [0 to 0]             |
| Kazakhstan                       | Male | 41.5 [30.9-55.87]      | 59.66 [44.46-79.65]    | 43.76  | 65.64 [49.82-87.15]   | 65.64 [49.82-87.15]   | 0 [0 to 0]             |
| Kenya                            | Male | 36.34 [27.32-48.06]    | 107.67 [80.2-142.38]   | 196.29 | 68.95 [51.83-90.95]   | 68.95 [51.83-90.95]   | 0 [0 to 0]             |
| Kuwait                           | Male | 2.23 [1.58-3.08]       | 8.31 [5.86-11.69]      | 272.65 | 29 [21.46-39.78]      | 29 [21.46-39.78]      | 0 [0 to 0]             |
| Kyrgyzstan                       | Male | 9.45 [7.08-12.67]      | 17.55 [13.11-23.45]    | 85.71  | 65.64 [49.82-87.15]   | 65.64 [49.82-87.15]   | 0 [0 to 0]             |
| Lao People's Democratic Republic | Male | 0.4 [0.26-0.58]        | 0.93 [0.61-1.35]       | 132.5  | 3.82 [2.6-5.38]       | 3.82 [2.6-5.38]       | 0 [0 to 0]             |
| Latvia                           | Male | 11 [8.26-14.66]        | 9.49 [7.14-12.64]      | -13.73 | 76.3 [57.89-101.15]   | 76.3 [57.89-101.15]   | 0 [0 to 0]             |
| Lebanon                          | Male | 3.61 [2.64-5.02]       | 7 [5.18-9.58]          | 93.91  | 29 [21.46-39.78]      | 29 [21.46-39.78]      | 0 [0 to 0]             |
| Lesotho                          | Male | 4.6 [3.49-6.09]        | 6.6 [5.01-8.63]        | 43.48  | 82.01 [62.18-108.33]  | 82.01 [62.18-108.33]  | 0 [0 to 0]             |
| Liberia                          | Male | 4.13 [3.15-5.47]       | 10.73 [7.92-14.37]     | 159.81 | 63.23 [48.09-83.63]   | 63.23 [48.09-83.63]   | 0 [0 to 0]             |
| Libya                            | Male | 3.78 [2.76-5.19]       | 10.81 [7.79-15.01]     | 185.98 | 29 [21.46-39.78]      | 29 [21.46-39.78]      | 0 [0 to 0]             |
| Lithuania                        | Male | 7.73 [5.64-10.59]      | 7.67 [5.62-10.56]      | -0.78  | 41.27 [30.54-56.05]   | 41.27 [30.54-56.05]   | 0.2 [0.08 to 0.33]     |
| Luxembourg                       | Male | 2.62 [1.96-3.5]        | 4.97 [3.69-6.68]       | 89.69  | 110.27 [82.68-146.57] | 110.27 [82.68-146.57] | 0 [0 to 0]             |
| Madagascar                       | Male | 20.04 [15.33-26.63]    | 52.36 [39.23-69.53]    | 161.28 | 63.23 [48.09-83.63]   | 63.23 [48.09-83.63]   | 0 [0 to 0]             |
| Malawi                           | Male | 15.49 [11.77-20.48]    | 31.06 [23.21-41.36]    | 100.52 | 63.23 [48.09-83.63]   | 63.23 [48.09-83.63]   | 0 [0 to 0]             |
| Malaysia                         | Male | 2.02 [1.32-2.87]       | 5.51 [3.67-7.83]       | 172.77 | 3.82 [2.6-5.38]       | 3.82 [2.6-5.38]       | 0 [0 to 0]             |
| Maldives                         | Male | 0.02 [0.01-0.03]       | 0.09 [0.06-0.13]       | 350    | 3.82 [2.6-5.38]       | 3.82 [2.6-5.38]       | 0 [0 to 0]             |
| Mali                             | Male | 15.84 [12.05-21.06]    | 36.3 [27.54-48.12]     | 129.17 | 63.23 [48.09-83.63]   | 63.23 [48.09-83.63]   | 0 [0 to 0]             |
| Malta                            | Male | 2.21 [1.68-2.93]       | 3.49 [2.64-4.71]       | 57.92  | 110.27 [82.68-146.57] | 110.27 [82.68-146.57] | 0 [0 to 0]             |
| Marshall Islands                 | Male | 0.01 [0.01-0.02]       | 0.02 [0.02-0.03]       | 100    | 11.63 [8.56-15.76]    | 11.63 [8.56-15.76]    | 0 [0 to 0]             |
| Mauritania                       | Male | 3.64 [2.79-4.84]       | 7.95 [6.08-10.54]      | 118.41 | 63.23 [48.09-83.63]   | 63.23 [48.09-83.63]   | 0 [0 to 0]             |
| Mauritius                        | Male | 0.14 [0.09-0.2]        | 0.31 [0.2-0.44]        | 121.43 | 3.82 [2.6-5.38]       | 3.82 [2.6-5.38]       | 0 [0 to 0]             |
| Mexico                           | Male | 258.21 [193.58-345.71] | 732.03 [551.03-977.15] | 183.5  | 100.65 [76.11-134.46] | 117.38 [88.79-155.99] | 0.75 [0.59 to 0.92]    |
| Micronesia (Federated States of) | Male | 0.03 [0.02-0.04]       | 0.05 [0.03-0.07]       | 66.67  | 11.63 [8.56-15.76]    | 11.63 [8.56-15.76]    | 0 [0 to 0]             |
| Mongolia                         | Male | 3.87 [2.92-5.17]       | 10.34 [7.68-13.88]     | 167.18 | 65.64 [49.82-87.15]   | 65.64 [49.82-87.15]   | 0 [0 to 0]             |



|                          |      |                        |                        |        |                       |                       |                      |
|--------------------------|------|------------------------|------------------------|--------|-----------------------|-----------------------|----------------------|
| Montenegro               | Male | 1.49 [1.1-2.04]        | 2 [1.49-2.73]          | 34.23  | 48.07 [35.92-65.22]   | 48.07 [35.92-65.22]   | 0 [0 to 0]           |
| Morocco                  | Male | 23.25 [17.06-31.76]    | 53.16 [38.94-73.09]    | 128.65 | 29 [21.46-39.78]      | 29 [21.46-39.78]      | 0 [0 to 0]           |
| Mozambique               | Male | 23.81 [17.99-31.58]    | 45.82 [34.45-60.6]     | 92.44  | 63.23 [48.09-83.63]   | 63.23 [48.09-83.63]   | 0 [0 to 0]           |
| Myanmar                  | Male | 4.49 [2.91-6.44]       | 8.44 [5.57-12.14]      | 87.97  | 3.82 [2.6-5.38]       | 3.82 [2.6-5.38]       | 0 [0 to 0]           |
| Namibia                  | Male | 3.3 [2.52-4.32]        | 7.14 [5.43-9.37]       | 116.36 | 82.01 [62.18-108.33]  | 82.01 [62.18-108.33]  | 0 [0 to 0]           |
| Nepal                    | Male | 17.08 [12.4-23.39]     | 33.13 [24.28-45.43]    | 93.97  | 28.81 [21.3-39.3]     | 28.81 [21.3-39.3]     | 0 [0 to 0]           |
| Netherlands              | Male | 65.49 [53.68-80.87]    | 99.39 [73.65-136.14]   | 51.76  | 76.25 [62.73-94.56]   | 79.29 [59.18-106.39]  | -0.05 [-0.21 to 0.1] |
| New Zealand              | Male | 15.78 [11.95-20.74]    | 26.63 [20.01-35.92]    | 68.76  | 89.84 [68.17-119.42]  | 89.84 [68.17-119.42]  | 0 [0 to 0]           |
| Nicaragua                | Male | 3.14 [2.34-4.24]       | 8.64 [6.46-11.7]       | 175.16 | 34.92 [26.18-47.08]   | 34.92 [26.18-47.08]   | 0 [0 to 0]           |
| Niger                    | Male | 13.19 [9.95-17.51]     | 32.26 [24.52-42.93]    | 144.58 | 63.23 [48.09-83.63]   | 63.23 [48.09-83.63]   | 0 [0 to 0]           |
| Nigeria                  | Male | 210.59 [156.71-281.54] | 398.32 [296.63-529.18] | 89.14  | 68.95 [51.83-90.95]   | 68.95 [51.83-90.95]   | 0 [0 to 0]           |
| North Macedonia          | Male | 4.83 [3.58-6.56]       | 7.35 [5.43-10]         | 52.17  | 48.07 [35.92-65.22]   | 48.07 [35.92-65.22]   | 0 [0 to 0]           |
| Northern Mariana Islands | Male | 0.02 [0.01-0.03]       | 0.04 [0.02-0.05]       | 100    | 11.63 [8.56-15.76]    | 11.63 [8.56-15.76]    | 0 [0 to 0]           |
| Norway                   | Male | 31.7 [24.58-41.52]     | 48.52 [36.5-65.58]     | 53.06  | 129.89 [99.06-171.86] | 130.19 [99.33-172.28] | 0.14 [0.07 to 0.21]  |
| Oman                     | Male | 2.04 [1.45-2.82]       | 7.36 [5.14-10.25]      | 260.78 | 29 [21.46-39.78]      | 29 [21.46-39.78]      | 0 [0 to 0]           |
| Pakistan                 | Male | 110.13 [82.11-148.84]  | 229.64 [169.01-314.87] | 108.52 | 32.45 [24.35-42.85]   | 32.45 [24.35-42.85]   | 0 [0 to 0]           |
| Palestine                | Male | 1.3 [0.95-1.78]        | 4.81 [3.47-6.67]       | 270    | 29 [21.46-39.78]      | 29 [21.46-39.78]      | 0 [0 to 0]           |
| Panama                   | Male | 2.98 [2.24-4.03]       | 7.35 [5.5-9.9]         | 146.64 | 34.92 [26.18-47.08]   | 34.92 [26.18-47.08]   | 0 [0 to 0]           |
| Papua New Guinea         | Male | 1.32 [0.93-1.84]       | 3.61 [2.52-5.09]       | 173.48 | 11.63 [8.56-15.76]    | 11.63 [8.56-15.76]    | 0 [0 to 0]           |
| Paraguay                 | Male | 3.36 [2.48-4.58]       | 8.17 [6.07-11.14]      | 143.15 | 26.98 [20.13-36.38]   | 26.98 [20.13-36.38]   | 0 [0 to 0]           |
| Peru                     | Male | 19.16 [14.17-26.12]    | 45.91 [34.23-62.68]    | 139.61 | 28.07 [20.95-38.16]   | 28.07 [20.95-38.16]   | 0.18 [0.07 to 0.29]  |
| Philippines              | Male | 8.45 [5.52-12.25]      | 20.75 [13.54-29.75]    | 145.56 | 5.09 [3.46-7]         | 5.09 [3.46-7]         | 0 [0 to 0]           |
| Poland                   | Male | 103.16 [78.7-136.46]   | 142.1 [107.31-188.2]   | 37.75  | 53.01 [40.53-70.2]    | 53.01 [40.53-70.2]    | 0 [0 to 0]           |
| Portugal                 | Male | 44.19 [33.05-60.36]    | 60.11 [45.17-81.3]     | 36.03  | 76.86 [58-104.14]     | 76.86 [58-104.14]     | -0.3 [-0.39 to -0.2] |
| Puerto Rico              | Male | 4.46 [3.34-6.05]       | 6.55 [4.83-8.86]       | 46.86  | 26.98 [20.13-36.38]   | 26.98 [20.13-36.38]   | 0 [0 to 0]           |
| Qatar                    | Male | 0.72 [0.5-1.01]        | 6.18 [4.32-8.61]       | 758.33 | 29 [21.46-39.78]      | 29 [21.46-39.78]      | 0 [0 to 0]           |

|                                  |      |                           |                           |        |                        |                        |                        |
|----------------------------------|------|---------------------------|---------------------------|--------|------------------------|------------------------|------------------------|
| Republic of Korea                | Male | 104.2 [76.34-140.48]      | 261.08 [190.86-360.09]    | 150.56 | 59.5 [44.51-80.18]     | 59.5 [44.51-80.18]     | 0.05 [-0.25 to 0.34]   |
| Republic of Moldova              | Male | 15.7 [11.86-20.95]        | 18.18 [13.74-24.19]       | 15.8   | 76.3 [57.89-101.15]    | 76.3 [57.89-101.15]    | 0 [0 to 0]             |
| Romania                          | Male | 63.08 [46.85-86.11]       | 67.36 [50.22-90.97]       | 6.79   | 48.07 [35.92-65.22]    | 48.07 [35.92-65.22]    | 0 [0 to 0]             |
| Russian Federation               | Male | 1827.04 [1382.08-2362.17] | 1963.02 [1492.41-2527.72] | 7.44   | 235.26 [177.86-302.44] | 218.93 [167.26-281.21] | -1.56 [-2.05 to -1.06] |
| Rwanda                           | Male | 10.58 [8.09-14.1]         | 24.24 [18.31-32.08]       | 129.11 | 63.23 [48.09-83.63]    | 63.23 [48.09-83.63]    | 0 [0 to 0]             |
| Saint Lucia                      | Male | 0.11 [0.08-0.15]          | 0.29 [0.22-0.4]           | 163.64 | 26.98 [20.13-36.38]    | 26.98 [20.13-36.38]    | 0 [0 to 0]             |
| Saint Vincent and the Grenadines | Male | 0.09 [0.06-0.12]          | 0.19 [0.14-0.26]          | 111.11 | 26.98 [20.13-36.38]    | 26.98 [20.13-36.38]    | 0 [0 to 0]             |
| Samoa                            | Male | 0.05 [0.04-0.07]          | 0.09 [0.07-0.13]          | 80     | 11.63 [8.56-15.76]     | 11.63 [8.56-15.76]     | 0 [0 to 0]             |
| Sao Tome and Principe            | Male | 0.2 [0.15-0.27]           | 0.48 [0.36-0.63]          | 140    | 63.23 [48.09-83.63]    | 63.23 [48.09-83.63]    | 0 [0 to 0]             |
| Saudi Arabia                     | Male | 54.21 [39.68-73.07]       | 221.75 [160.33-300.54]    | 309.06 | 86.73 [65.24-114.89]   | 86.73 [65.24-114.89]   | -0.71 [-0.99 to -0.43] |
| Senegal                          | Male | 12.39 [9.49-16.48]        | 29.16 [22.21-38.76]       | 135.35 | 63.23 [48.09-83.63]    | 63.23 [48.09-83.63]    | 0 [0 to 0]             |
| Serbia                           | Male | 27.07 [19.98-36.91]       | 28.87 [21.45-39.03]       | 6.65   | 48.07 [35.92-65.22]    | 48.07 [35.92-65.22]    | 0 [0 to 0]             |
| Seychelles                       | Male | 0.01 [0.01-0.01]          | 0.02 [0.01-0.03]          | 100    | 3.82 [2.6-5.38]        | 3.82 [2.6-5.38]        | 0 [0 to 0]             |
| Sierra Leone                     | Male | 7.07 [5.42-9.38]          | 15.88 [12.02-21.05]       | 124.61 | 63.23 [48.09-83.63]    | 63.23 [48.09-83.63]    | 0 [0 to 0]             |
| Singapore                        | Male | 6.85 [5.15-9.18]          | 23.11 [17.4-31.41]        | 237.37 | 52.77 [40.02-71.34]    | 52.77 [40.02-71.34]    | 0 [0 to 0]             |
| Slovakia                         | Male | 12.67 [9.51-16.92]        | 18.39 [13.66-24.68]       | 45.15  | 48.07 [35.92-65.22]    | 48.07 [35.92-65.22]    | 0 [0 to 0]             |
| Slovenia                         | Male | 5.3 [3.91-7.22]           | 7.71 [5.72-10.45]         | 45.47  | 48.07 [35.92-65.22]    | 48.07 [35.92-65.22]    | 0 [0 to 0]             |
| Solomon Islands                  | Male | 0.1 [0.07-0.14]           | 0.22 [0.15-0.31]          | 120    | 11.63 [8.56-15.76]     | 11.63 [8.56-15.76]     | 0 [0 to 0]             |
| Somalia                          | Male | 12.8 [9.54-17.1]          | 32.55 [24.09-43.77]       | 154.3  | 63.23 [48.09-83.63]    | 63.23 [48.09-83.63]    | 0 [0 to 0]             |
| South Africa                     | Male | 104.7 [78.86-137.44]      | 222.41 [167.53-292.61]    | 112.43 | 87.91 [66.74-115.32]   | 87.91 [66.74-115.32]   | 0 [0 to 0]             |
| South Sudan                      | Male | 10.69 [8.15-14.18]        | 17.93 [13.4-23.84]        | 67.73  | 63.23 [48.09-83.63]    | 63.23 [48.09-83.63]    | 0 [0 to 0]             |
| Spain                            | Male | 181.71 [135.63-244.61]    | 362.14 [233.18-547.14]    | 99.3   | 82.02 [61.73-110.03]   | 103.08 [67.06-154.41]  | 1.74 [1.34 to 2.15]    |
| Sri Lanka                        | Male | 2.3 [1.52-3.28]           | 4.36 [2.94-6.33]          | 89.57  | 3.82 [2.6-5.38]        | 3.82 [2.6-5.38]        | 0 [0 to 0]             |
| Sudan                            | Male | 16.41 [12.09-22.43]       | 37.49 [27.23-51.42]       | 128.46 | 29 [21.46-39.78]       | 29 [21.46-39.78]       | 0 [0 to 0]             |
| Suriname                         | Male | 0.38 [0.28-0.51]          | 0.84 [0.61-1.15]          | 121.05 | 26.98 [20.13-36.38]    | 26.98 [20.13-36.38]    | 0 [0 to 0]             |
| Sweden                           | Male | 36.38 [27.37-47.79]       | 47.5 [35.64-62.97]        | 30.57  | 65.99 [49.83-87.88]    | 65.3 [49.37-86.88]     | -0.28 [-0.74 to 0.19]  |

|                              |      |                           |                          |        |                       |                        |                        |
|------------------------------|------|---------------------------|--------------------------|--------|-----------------------|------------------------|------------------------|
| Switzerland                  | Male | 46.02 [34.63-61.28]       | 71.45 [53.25-96.53]      | 55.26  | 110.27 [82.68-146.57] | 110.27 [82.68-146.57]  | 0 [0 to 0]             |
| Syrian Arab Republic         | Male | 9.63 [7.08-13.16]         | 21.56 [15.56-30.01]      | 123.88 | 29 [21.46-39.78]      | 29 [21.46-39.78]       | 0 [0 to 0]             |
| Tajikistan                   | Male | 9.67 [7.29-12.99]         | 23.49 [17.51-31.42]      | 142.92 | 65.64 [49.82-87.15]   | 65.64 [49.82-87.15]    | 0 [0 to 0]             |
| Thailand                     | Male | 7.26 [4.74-10.41]         | 17.97 [11.9-26.11]       | 147.52 | 3.81 [2.56-5.37]      | 3.82 [2.6-5.38]        | 0.01 [0.01 to 0.01]    |
| Timor-Leste                  | Male | 0.07 [0.05-0.11]          | 0.16 [0.11-0.23]         | 128.57 | 3.82 [2.6-5.38]       | 3.82 [2.6-5.38]        | 0 [0 to 0]             |
| Togo                         | Male | 5.19 [3.93-6.88]          | 16.07 [11.95-21.46]      | 209.63 | 63.23 [48.09-83.63]   | 63.23 [48.09-83.63]    | 0 [0 to 0]             |
| Tonga                        | Male | 0.03 [0.02-0.05]          | 0.05 [0.03-0.06]         | 66.67  | 11.63 [8.56-15.76]    | 11.63 [8.56-15.76]     | 0 [0 to 0]             |
| Trinidad and Tobago          | Male | 1.2 [0.89-1.63]           | 2.41 [1.79-3.31]         | 100.83 | 26.98 [20.13-36.38]   | 26.98 [20.13-36.38]    | 0 [0 to 0]             |
| Tunisia                      | Male | 8.27 [6.04-11.44]         | 19.36 [14.21-26.68]      | 134.1  | 29 [21.46-39.78]      | 29 [21.46-39.78]       | 0 [0 to 0]             |
| Turkey                       | Male | 15.42 [10.38-22.31]       | 35.11 [23.98-49.78]      | 127.69 | 7.7 [5.36-10.89]      | 7.7 [5.36-10.89]       | -0.21 [-0.51 to 0.08]  |
| Turkmenistan                 | Male | 7.69 [6.09-9.83]          | 17.57 [13.08-23.65]      | 128.48 | 74.18 [58.89-93.83]   | 73.79 [56.04-97.91]    | -0.02 [-0.03 to -0.01] |
| Uganda                       | Male | 25.66 [19.58-34.12]       | 60.35 [45.36-79.86]      | 135.19 | 63.23 [48.09-83.63]   | 63.23 [48.09-83.63]    | 0 [0 to 0]             |
| Ukraine                      | Male | 165.15 [123-222.04]       | 165.77 [124.3-220.78]    | 0.38   | 58.69 [44.68-77.03]   | 58.97 [44.89-77.36]    | 0.26 [0.1 to 0.41]     |
| United Arab Emirates         | Male | 2.82 [1.91-3.95]          | 29.73 [20.23-41.74]      | 954.26 | 29 [21.46-39.78]      | 29 [21.46-39.78]       | 0 [0 to 0]             |
| United Kingdom               | Male | 391.16 [297.84-520.75]    | 494.24 [375.32-668.46]   | 26.35  | 114.75 [86.57-152.14] | 108.23 [81.63-143.66]  | -0.43 [-0.61 to -0.24] |
| United Republic of Tanzania  | Male | 41.26 [31.44-54.8]        | 103.66 [78.34-137.49]    | 151.24 | 63.23 [48.09-83.63]   | 63.23 [48.09-83.63]    | 0 [0 to 0]             |
| United States of America     | Male | 2608.22 [1999.54-3358.03] | 4431.89 [3360.93-5905.6] | 69.92  | 200.8 [152.23-261.02] | 204.08 [157.47-267.25] | 0.24 [-0.26 to 0.74]   |
| United States Virgin Islands | Male | 0.13 [0.1-0.18]           | 0.19 [0.14-0.26]         | 46.15  | 26.98 [20.13-36.38]   | 26.98 [20.13-36.38]    | 0 [0 to 0]             |
| Uruguay                      | Male | 13.47 [10.13-18.37]       | 16.56 [12.5-22.55]       | 22.94  | 83.05 [62.52-112.17]  | 83.05 [62.52-112.17]   | 0 [0 to 0]             |
| Uzbekistan                   | Male | 38.8 [29.12-52.14]        | 94.11 [69.88-125.79]     | 142.55 | 65.64 [49.82-87.15]   | 65.64 [49.82-87.15]    | 0 [0 to 0]             |
| Vanuatu                      | Male | 0.05 [0.03-0.07]          | 0.12 [0.08-0.16]         | 140    | 11.63 [8.56-15.76]    | 11.63 [8.56-15.76]     | 0 [0 to 0]             |
| Venezuela                    | Male | 6.98 [4.99-9.7]           | 19.02 [13.46-26.39]      | 172.49 | 12.88 [9.36-17.9]     | 12.88 [9.36-17.9]      | -0.07 [-0.11 to -0.03] |
| VietNam                      | Male | 6.77 [4.43-9.65]          | 17.57 [11.49-25.37]      | 159.53 | 3.82 [2.6-5.38]       | 3.82 [2.6-5.38]        | 0 [0 to 0]             |
| Yemen                        | Male | 9.48 [6.9-12.9]           | 26.89 [19.49-36.64]      | 183.65 | 29 [21.46-39.78]      | 29 [21.46-39.78]       | 0 [0 to 0]             |
| Zambia                       | Male | 12.13 [9.24-16.13]        | 33.12 [24.7-44.39]       | 173.04 | 63.23 [48.09-83.63]   | 63.23 [48.09-83.63]    | 0 [0 to 0]             |
| Zimbabwe                     | Male | 21.76 [16.58-28.66]       | 38.69 [29.16-51.09]      | 77.8   | 82.01 [62.18-108.33]  | 82.01 [62.18-108.33]   | 0 [0 to 0]             |

|                                  |        |                        |                         |        |                        |                        |                        |
|----------------------------------|--------|------------------------|-------------------------|--------|------------------------|------------------------|------------------------|
| Afghanistan                      | Female | 26.72 [19.66-35.75]    | 64.83 [46.59-88.07]     | 142.63 | 66.8 [49.71-88.07]     | 48.05 [36.06-64.16]    | 0 [0 to 0]             |
| Albania                          | Female | 6.69 [5.07-9.09]       | 11.31 [8.5-15.57]       | 69.06  | 58.15 [44.01-78.74]    | 53.33 [40.1-72.31]     | 0 [0 to 0]             |
| Algeria                          | Female | 47.86 [35.6-63.61]     | 135.61 [100.56-181.21]  | 183.35 | 66.8 [49.71-88.07]     | 47.72 [35.83-63.72]    | 0 [0 to 0]             |
| American Samoa                   | Female | 0.03 [0.02-0.04]       | 0.06 [0.04-0.08]        | 100    | 21.08 [15.62-28.72]    | 16.46 [12.19-22.42]    | 0 [0 to 0]             |
| Andorra                          | Female | 0.45 [0.34-0.59]       | 1.07 [0.78-1.43]        | 137.78 | 161.21 [119.81-213.68] | 217.34 [162.73-285.01] | 0 [0 to 0]             |
| Angola                           | Female | 27.64 [20.89-36.48]    | 89.38 [67.21-118.13]    | 223.37 | 100.24 [76.12-130.42]  | 83.05 [63.42-108.91]   | 0 [0 to 0]             |
| Antigua and Barbuda              | Female | 0.14 [0.11-0.18]       | 0.32 [0.24-0.42]        | 128.57 | 54.39 [40.98-71.57]    | 41.37 [31.32-54.93]    | 0 [0 to 0]             |
| Argentina                        | Female | 382.67 [287.53-502.69] | 592.09 [446.12-776.63]  | 54.73  | 232.56 [174.38-306.32] | 160.15 [121-211.36]    | 0 [0 to 0]             |
| Armenia                          | Female | 21.66 [15.88-29.32]    | 28.05 [20.74-37.73]     | 29.5   | 134.75 [100.77-179.14] | 103.01 [77.78-136.86]  | 0 [0 to 0]             |
| Australia                        | Female | 216.19 [165.34-282.51] | 406.09 [304.23-546.38]  | 87.84  | 240.35 [180.87-316.28] | 170.1 [128.92-227.38]  | -0.26 [-0.45 to -0.08] |
| Austria                          | Female | 80.19 [60.7-106.56]    | 108.29 [80.75-145.26]   | 35.04  | 161.21 [119.81-213.68] | 202.65 [153.17-266.04] | 0 [0 to 0]             |
| Azerbaijan                       | Female | 49.25 [36.21-66.53]    | 104.41 [75.47-139.88]   | 112    | 163.86 [121.76-215.02] | 113.46 [84.95-149.21]  | 0.31 [0.12 to 0.51]    |
| Bahamas                          | Female | 0.52 [0.4-0.7]         | 1.29 [0.96-1.71]        | 148.08 | 54.39 [40.98-71.57]    | 41.52 [31.44-55.06]    | 0 [0 to 0]             |
| Bahrain                          | Female | 0.78 [0.58-1.03]       | 4.32 [3.14-5.87]        | 453.85 | 66.8 [49.71-88.07]     | 41.9 [31.37-56.41]     | 0 [0 to 0]             |
| Bangladesh                       | Female | 144.08 [108.01-191.8]  | 404.23 [303.21-539.83]  | 180.56 | 56.21 [42.33-74.43]    | 42.48 [32.08-56.75]    | 0 [0 to 0]             |
| Barbados                         | Female | 0.72 [0.54-0.93]       | 1.26 [0.95-1.67]        | 75     | 54.39 [40.98-71.57]    | 41.54 [31.46-55.1]     | 0 [0 to 0]             |
| Belarus                          | Female | 96.05 [72.5-128.62]    | 106.51 [79.98-142.41]   | 10.89  | 140.74 [105.93-185.35] | 111.39 [84.49-145.22]  | 0 [0 to 0]             |
| Belgium                          | Female | 102.35 [76.62-136.28]  | 131.07 [97.83-175.4]    | 28.06  | 161.21 [119.81-213.68] | 173.3 [129.9-227.7]    | 0 [0 to 0]             |
| Belize                           | Female | 0.26 [0.2-0.34]        | 0.92 [0.68-1.24]        | 253.85 | 54.39 [40.98-71.57]    | 40.72 [30.88-54.16]    | 0 [0 to 0]             |
| Benin                            | Female | 12.7 [9.72-16.67]      | 35.28 [26.7-46.51]      | 177.8  | 100.24 [76.12-130.42]  | 82.46 [62.91-108.15]   | 0 [0 to 0]             |
| Bermuda                          | Female | 0.19 [0.14-0.25]       | 0.3 [0.23-0.4]          | 57.89  | 54.39 [40.98-71.57]    | 41.1 [31.12-54.54]     | 0 [0 to 0]             |
| Bhutan                           | Female | 0.85 [0.64-1.13]       | 1.73 [1.31-2.29]        | 103.53 | 56.21 [42.33-74.43]    | 41.91 [31.71-55.76]    | 0 [0 to 0]             |
| Bolivia (Plurinational State of) | Female | 16.99 [12.8-22.51]     | 43.05 [32.63-57.45]     | 153.38 | 84.46 [64.22-113.23]   | 58.9 [44.8-78.84]      | 0 [0 to 0]             |
| Bosnia and Herzegovina           | Female | 14.43 [10.79-19.76]    | 15.77 [11.77-21.73]     | 9.29   | 58.15 [44.01-78.74]    | 53.44 [40.28-72.49]    | 0 [0 to 0]             |
| Botswana                         | Female | 4.29 [3.28-5.49]       | 11.69 [8.83-15.02]      | 172.49 | 110.4 [84.37-142]      | 97.27 [74.55-126.02]   | 0 [0 to 0]             |
| Brazil                           | Female | 324.68 [245.65-429.29] | 796.99 [603.75-1052.64] | 145.47 | 60.56 [46.06-79.76]    | 46.51 [35.53-61.55]    | 0 [0 to 0]             |

|                                       |        |                           |                          |        |                        |                        |                        |
|---------------------------------------|--------|---------------------------|--------------------------|--------|------------------------|------------------------|------------------------|
| Brunei Darussalam                     | Female | 2.13 [1.6-2.8]            | 6.79 [5.07-9.14]         | 218.78 | 283.43 [213.8-376.63]  | 164.21 [124.75-217.78] | 0 [0 to 0]             |
| Bulgaria                              | Female | 35.31 [26.43-48.38]       | 34.26 [25.55-46.48]      | -2.97  | 58.15 [44.01-78.74]    | 53.46 [40.33-72.5]     | 0 [0 to 0]             |
| Burkina Faso                          | Female | 28.27 [21.5-37.2]         | 68.3 [51.65-89.93]       | 141.6  | 100.24 [76.12-130.42]  | 83.27 [63.53-109.17]   | 0 [0 to 0]             |
| Burundi                               | Female | 15.33 [11.73-20.12]       | 31.09 [23.61-40.98]      | 102.8  | 100.24 [76.12-130.42]  | 80.73 [61.58-105.85]   | 0 [0 to 0]             |
| Cabo Verde                            | Female | 1.14 [0.88-1.5]           | 2.54 [1.94-3.31]         | 122.81 | 100.24 [76.12-130.42]  | 82.23 [62.86-107.78]   | 0 [0 to 0]             |
| Cambodia                              | Female | 2.96 [2.03-4.19]          | 7.53 [5.26-10.62]        | 154.39 | 10.37 [7.49-14.19]     | 7.54 [5.54-10.13]      | 0 [0 to 0]             |
| Cameroon                              | Female | 29.51 [22.37-38.89]       | 85.7 [64.95-112.66]      | 190.41 | 100.24 [76.12-130.42]  | 81.94 [62.55-107.43]   | 0 [0 to 0]             |
| Canada                                | Female | 431.81 [326.24-569]       | 719.47 [530.54-963.81]   | 66.62  | 288.53 [214.35-383.77] | 226.8 [169.36-300.5]   | 0 [0 to 0]             |
| Central African Republic              | Female | 8.27 [6.22-10.91]         | 16.6 [12.47-21.99]       | 100.73 | 100.24 [76.12-130.42]  | 82.42 [62.9-108.09]    | 0 [0 to 0]             |
| Chad                                  | Female | 17.12 [13.06-22.52]       | 37.98 [28.61-49.97]      | 121.85 | 100.24 [76.12-130.42]  | 81.03 [61.81-106.28]   | 0 [0 to 0]             |
| Chile                                 | Female | 136.34 [103.1-178.94]     | 273.36 [203.07-362.89]   | 100.5  | 232.56 [174.38-306.32] | 160.2 [121.03-211.62]  | 0 [0 to 0]             |
| China                                 | Female | 2168.87 [1620.84-2903.28] | 5391.36 [4015.1-7302.04] | 148.58 | 46.08 [34.87-61.5]     | 52.71 [39.69-70.52]    | 0.49 [0.29 to 0.69]    |
| Colombia                              | Female | 61.32 [46.03-82.12]       | 161.54 [120.61-217.16]   | 163.44 | 57.04 [42.87-76.75]    | 46.74 [35.34-62.46]    | 0 [0 to 0]             |
| Comoros                               | Female | 1.32 [1.01-1.74]          | 3 [2.27-3.93]            | 127.27 | 100.24 [76.12-130.42]  | 82.27 [62.85-107.89]   | 0 [0 to 0]             |
| Congo                                 | Female | 7.06 [5.36-9.23]          | 19.54 [14.7-25.8]        | 176.77 | 100.24 [76.12-130.42]  | 81.58 [62.2-107.04]    | 0 [0 to 0]             |
| Costa Rica                            | Female | 5.65 [4.28-7.52]          | 15.99 [11.97-21.52]      | 183.01 | 57.04 [42.87-76.75]    | 46.66 [35.29-62.36]    | 0 [0 to 0]             |
| Cote d'Ivoire                         | Female | 28.4 [21.4-37.55]         | 75.78 [57.47-99.64]      | 166.83 | 100.24 [76.12-130.42]  | 80.38 [61.33-105.43]   | 0 [0 to 0]             |
| Croatia                               | Female | 20.98 [15.39-27.75]       | 20.57 [15.4-28.2]        | -1.95  | 61.57 [46.38-80.89]    | 53.45 [40.28-72.49]    | -0.22 [-0.28 to -0.16] |
| Cuba                                  | Female | 28.15 [21.24-37.26]       | 48.75 [36.62-65.19]      | 73.18  | 54.39 [40.98-71.57]    | 41.04 [31.04-54.5]     | 0 [0 to 0]             |
| Cyprus                                | Female | 6.58 [4.96-8.73]          | 14.57 [10.9-19.36]       | 121.43 | 161.21 [119.81-213.68] | 186.33 [139.18-244.68] | 0 [0 to 0]             |
| Czechia                               | Female | 39.88 [30.15-53.54]       | 49.59 [37.37-66.44]      | 24.35  | 58.15 [44.01-78.74]    | 53.35 [40.21-72.32]    | 0 [0 to 0]             |
| Democratic People's Republic of Korea | Female | 49.44 [36.29-66.84]       | 80.97 [60.26-110.53]     | 63.77  | 46.21 [34.65-62.26]    | 46.51 [34.93-62.42]    | 0 [0 to 0]             |
| Democratic Republic of the Congo      | Female | 110.79 [83.81-146.02]     | 257.46 [194.44-340.06]   | 132.39 | 100.24 [76.12-130.42]  | 82.31 [62.86-107.93]   | 0 [0 to 0]             |
| Denmark                               | Female | 75.15 [58.02-95.42]       | 85.04 [63.13-114.8]      | 13.16  | 235.43 [181.27-302.41] | 184.8 [138.19-244.75]  | -0.28 [-0.35 to -0.21] |
| Djibouti                              | Female | 1.1 [0.83-1.45]           | 4.46 [3.34-5.89]         | 305.45 | 100.24 [76.12-130.42]  | 80.15 [61.16-105.16]   | 0 [0 to 0]             |
| Dominica                              | Female | 0.18 [0.13-0.23]          | 0.22 [0.17-0.3]          | 22.22  | 54.39 [40.98-71.57]    | 40.29 [30.49-53.74]    | 0 [0 to 0]             |

|                    |        |                        |                         |        |                        |                        |                        |
|--------------------|--------|------------------------|-------------------------|--------|------------------------|------------------------|------------------------|
| Dominican Republic | Female | 11.96 [9.04-15.94]     | 27.78 [20.92-36.88]     | 132.27 | 54.39 [40.98-71.57]    | 40.8 [30.88-54.25]     | 0 [0 to 0]             |
| Ecuador            | Female | 39.46 [29.51-51.79]    | 119 [95.9-143.53]       | 201.57 | 123.24 [92.61-163.64]  | 92.4 [74.22-112.66]    | 0.66 [0.52 to 0.79]    |
| Egypt              | Female | 121.51 [90.05-163.14]  | 258.47 [190.83-348.02]  | 112.72 | 66.8 [49.71-88.07]     | 46.83 [35.09-62.59]    | 0 [0 to 0]             |
| El Salvador        | Female | 9.77 [7.35-13.12]      | 19.23 [14.49-25.86]     | 96.83  | 57.04 [42.87-76.75]    | 47.68 [35.95-63.73]    | 0 [0 to 0]             |
| Equatorial Guinea  | Female | 1.37 [1.04-1.81]       | 3.91 [2.96-5.15]        | 185.4  | 100.24 [76.12-130.42]  | 83.91 [64.02-109.95]   | 0 [0 to 0]             |
| Eritrea            | Female | 8.19 [6.15-10.85]      | 21.2 [15.99-28.02]      | 158.85 | 100.24 [76.12-130.42]  | 82.86 [63.34-108.56]   | 0 [0 to 0]             |
| Estonia            | Female | 15.03 [11.31-20.03]    | 13.92 [10.6-18.55]      | -7.39  | 140.74 [105.93-185.35] | 110.1 [83.49-143.48]   | 0 [0 to 0]             |
| Eswatini           | Female | 2.44 [1.84-3.15]       | 4.64 [3.55-5.95]        | 90.16  | 110.4 [84.37-142]      | 97.77 [75.02-126.67]   | 0 [0 to 0]             |
| Ethiopia           | Female | 138.92 [104.57-182.8]  | 302.36 [227.71-397.91]  | 117.65 | 108.46 [82.87-142.7]   | 88.37 [67.18-115.98]   | 0 [0 to 0]             |
| Fiji               | Female | 0.49 [0.35-0.68]       | 0.91 [0.66-1.26]        | 85.71  | 21.08 [15.62-28.72]    | 16.46 [12.21-22.34]    | 0 [0 to 0]             |
| Finland            | Female | 51.08 [39.02-67.83]    | 61.07 [46.43-82.13]     | 19.56  | 157.31 [118.32-208.56] | 99.83 [75.8-132.45]    | 0.01 [-0.01 to 0.02]   |
| France             | Female | 556.39 [417.9-735.79]  | 756.9 [568.11-1010.04]  | 36.04  | 161.21 [119.81-213.68] | 127.29 [96-169.01]     | 0 [0 to 0]             |
| Gabon              | Female | 3.15 [2.39-4.16]       | 7.13 [5.37-9.42]        | 126.35 | 100.24 [76.12-130.42]  | 82.29 [62.78-107.87]   | 0 [0 to 0]             |
| Gambia             | Female | 2.22 [1.68-2.9]        | 6.4 [4.85-8.41]         | 188.29 | 100.24 [76.12-130.42]  | 81.76 [62.33-107.23]   | 0 [0 to 0]             |
| Germany            | Female | 709.36 [535.78-945.77] | 833.95 [637.46-1116.31] | 17.56  | 127.13 [95.32-169.31]  | 87.24 [67.22-115.95]   | -0.01 [-0.01 to -0.01] |
| Ghana              | Female | 42.76 [32.47-56.27]    | 118.86 [89.92-156.46]   | 177.97 | 100.24 [76.12-130.42]  | 83.29 [63.59-109.2]    | 0 [0 to 0]             |
| Greece             | Female | 54.4 [40.82-73.27]     | 66.13 [50.07-88.35]     | 21.56  | 77.98 [58.98-103.51]   | 56.92 [43.37-76.2]     | 0.68 [0.4 to 0.96]     |
| Greenland          | Female | 0.64 [0.48-0.85]       | 1.02 [0.73-1.4]         | 59.38  | 288.53 [214.35-383.77] | 220.88 [165.16-292.93] | 0 [0 to 0]             |
| Grenada            | Female | 0.18 [0.14-0.24]       | 0.32 [0.24-0.43]        | 77.78  | 54.39 [40.98-71.57]    | 40.58 [30.67-54.04]    | 0 [0 to 0]             |
| Guam               | Female | 0.1 [0.07-0.13]        | 0.2 [0.15-0.27]         | 100    | 21.08 [15.62-28.72]    | 16.31 [12.09-22.07]    | 0 [0 to 0]             |
| Guatemala          | Female | 12.89 [9.61-17.35]     | 38.93 [29.26-52.06]     | 202.02 | 57.04 [42.87-76.75]    | 47.18 [35.62-63.06]    | 0 [0 to 0]             |
| Guinea             | Female | 19.37 [14.79-25.36]    | 36.29 [27.56-47.72]     | 87.35  | 100.24 [76.12-130.42]  | 82.2 [62.69-107.79]    | 0 [0 to 0]             |
| Guinea-Bissau      | Female | 2.79 [2.12-3.67]       | 5.61 [4.25-7.38]        | 101.08 | 100.24 [76.12-130.42]  | 83 [63.36-108.82]      | 0 [0 to 0]             |
| Guyana             | Female | 1.26 [0.95-1.69]       | 2.04 [1.52-2.71]        | 61.9   | 54.39 [40.98-71.57]    | 41.16 [31.18-54.66]    | 0 [0 to 0]             |
| Haiti              | Female | 10.73 [8.06-14.32]     | 25.55 [19.14-34.31]     | 138.12 | 54.39 [40.98-71.57]    | 41.5 [31.48-55.05]     | 0 [0 to 0]             |
| Honduras           | Female | 7.04 [5.29-9.44]       | 21.23 [15.9-28.47]      | 201.56 | 57.04 [42.87-76.75]    | 46.62 [35.26-62.33]    | 0 [0 to 0]             |

|                                  |        |                           |                           |        |                        |                        |                        |
|----------------------------------|--------|---------------------------|---------------------------|--------|------------------------|------------------------|------------------------|
| Hungary                          | Female | 42.9 [32.23-58.69]        | 47.89 [35.94-64.5]        | 11.63  | 58.15 [44.01-78.74]    | 53.61 [40.46-72.75]    | 0 [0 to 0]             |
| Iceland                          | Female | 3.6 [2.88-4.58]           | 6.62 [5.01-8.53]          | 83.89  | 294.75 [234.01-381.69] | 280.51 [209.43-363.33] | 0.28 [-0.63 to 1.19]   |
| India                            | Female | 1669.77 [1252.71-2234.69] | 3941.38 [3001.23-5275.05] | 136.04 | 62.63 [47.77-83.63]    | 47.6 [36.33-63.56]     | 0 [0 to 0]             |
| Indonesia                        | Female | 71.24 [51.9-97.75]        | 155 [112.8-211.68]        | 117.57 | 12.59 [9.4-16.66]      | 9 [6.8-11.92]          | 0 [0 to 0]             |
| Iran (Islamic Republic of)       | Female | 174.02 [130.84-231.05]    | 507.48 [383.03-673.14]    | 191.62 | 111.88 [83.78-149.33]  | 75.64 [57.34-100.02]   | 0.03 [-0.13 to 0.2]    |
| Iraq                             | Female | 30.74 [22.99-41.05]       | 101.73 [75.27-136.97]     | 230.94 | 66.8 [49.71-88.07]     | 47.69 [35.83-63.62]    | 0 [0 to 0]             |
| Ireland                          | Female | 28.56 [21.72-37.86]       | 53.03 [39.58-70.69]       | 85.68  | 161.21 [119.81-213.68] | 136.11 [102.52-180.41] | 0 [0 to 0]             |
| Israel                           | Female | 48.18 [36.71-61.81]       | 105.51 [79.3-136.79]      | 118.99 | 213.47 [159.6-278.69]  | 187.87 [140.06-245.73] | -0.44 [-0.64 to -0.23] |
| Italy                            | Female | 566.57 [433.14-753.13]    | 752.54 [574.98-1013.15]   | 32.82  | 144.74 [109.48-190.78] | 118.29 [89.84-158.04]  | 0.3 [0.08 to 0.52]     |
| Jamaica                          | Female | 4.6 [3.51-6.01]           | 8.32 [6.26-10.96]         | 80.87  | 54.39 [40.98-71.57]    | 40.89 [31-54.36]       | 0 [0 to 0]             |
| Japan                            | Female | 1692.66 [1270.89-2237.41] | 2252.71 [1734.73-2919.88] | 33.09  | 193.86 [146.38-255.45] | 144.81 [109.46-188.98] | 2 [1.55 to 2.44]       |
| Jordan                           | Female | 5.92 [4.36-8]             | 28.68 [21-38.71]          | 384.46 | 66.8 [49.71-88.07]     | 46.34 [34.77-61.94]    | 0 [0 to 0]             |
| Kazakhstan                       | Female | 103.41 [77.17-138.48]     | 144.73 [107.49-192.82]    | 39.96  | 134.75 [100.77-179.14] | 102.79 [77.65-136.47]  | 0 [0 to 0]             |
| Kenya                            | Female | 57.1 [43.23-74.8]         | 169.67 [127.73-222.87]    | 197.15 | 108.46 [82.87-142.7]   | 89.12 [67.9-117.09]    | 0 [0 to 0]             |
| Kuwait                           | Female | 2.61 [1.92-3.45]          | 14.39 [10.36-19.37]       | 451.34 | 66.8 [49.71-88.07]     | 45.02 [33.83-60.31]    | 0 [0 to 0]             |
| Kyrgyzstan                       | Female | 22.62 [16.91-30.24]       | 41.16 [30.33-55.03]       | 81.96  | 134.75 [100.77-179.14] | 102.32 [77.32-135.89]  | 0 [0 to 0]             |
| Lao People's Democratic Republic | Female | 1.22 [0.84-1.73]          | 2.67 [1.85-3.79]          | 118.85 | 10.37 [7.49-14.19]     | 7.21 [5.29-9.67]       | 0 [0 to 0]             |
| Latvia                           | Female | 26.25 [19.74-35.09]       | 21.58 [16.29-28.87]       | -17.79 | 140.74 [105.93-185.35] | 110.97 [84.16-144.68]  | 0 [0 to 0]             |
| Lebanon                          | Female | 8.75 [6.52-11.6]          | 19.12 [14.3-25.21]        | 118.51 | 66.8 [49.71-88.07]     | 49.65 [37.22-66.5]     | 0 [0 to 0]             |
| Lesotho                          | Female | 6.48 [4.98-8.27]          | 9.37 [7.19-12.01]         | 44.6   | 110.4 [84.37-142]      | 97.54 [74.83-126.5]    | 0 [0 to 0]             |
| Liberia                          | Female | 5.93 [4.55-7.76]          | 15.24 [11.34-20.14]       | 157    | 100.24 [76.12-130.42]  | 80.85 [61.64-106.1]    | 0 [0 to 0]             |
| Libya                            | Female | 6.73 [5.03-8.96]          | 23.06 [16.88-31.13]       | 242.64 | 66.8 [49.71-88.07]     | 47.34 [35.51-63.15]    | 0 [0 to 0]             |
| Lithuania                        | Female | 21.07 [16.01-28.55]       | 20.61 [15.73-27.78]       | -2.18  | 86.95 [66.32-116.87]   | 66.16 [50.46-88.6]     | 0.24 [0.09 to 0.39]    |
| Luxembourg                       | Female | 3.95 [2.95-5.26]          | 7.01 [5.21-9.34]          | 77.47  | 161.21 [119.81-213.68] | 135.22 [101.85-179.29] | 0 [0 to 0]             |
| Madagascar                       | Female | 32.08 [24.31-42.25]       | 84 [62.9-111.09]          | 161.85 | 100.24 [76.12-130.42]  | 82.06 [62.62-107.59]   | 0 [0 to 0]             |
| Malawi                           | Female | 25.79 [19.64-33.87]       | 51.43 [39.24-67.42]       | 99.42  | 100.24 [76.12-130.42]  | 82.62 [63.12-108.35]   | 0 [0 to 0]             |

|                                  |        |                        |                          |        |                        |                        |                        |
|----------------------------------|--------|------------------------|--------------------------|--------|------------------------|------------------------|------------------------|
| Malaysia                         | Female | 5.56 [3.84-7.77]       | 14.61 [10.21-20.49]      | 162.77 | 10.37 [7.49-14.19]     | 7.05 [5.16-9.5]        | 0 [0 to 0]             |
| Maldives                         | Female | 0.05 [0.03-0.07]       | 0.17 [0.12-0.24]         | 240    | 10.37 [7.49-14.19]     | 6.65 [4.84-8.95]       | 0 [0 to 0]             |
| Mali                             | Female | 25.79 [19.68-33.87]    | 56.08 [42.54-73.72]      | 117.45 | 100.24 [76.12-130.42]  | 81.39 [62.05-106.8]    | 0 [0 to 0]             |
| Malta                            | Female | 3.58 [2.68-4.72]       | 5 [3.8-6.66]             | 39.66  | 161.21 [119.81-213.68] | 135.55 [102.07-179.83] | 0 [0 to 0]             |
| Marshall Islands                 | Female | 0.02 [0.01-0.03]       | 0.05 [0.03-0.06]         | 150    | 21.08 [15.62-28.72]    | 16.25 [12.08-22.21]    | 0 [0 to 0]             |
| Mauritania                       | Female | 6.01 [4.62-7.86]       | 13.24 [10.02-17.43]      | 120.3  | 100.24 [76.12-130.42]  | 82.16 [62.63-107.74]   | 0 [0 to 0]             |
| Mauritius                        | Female | 0.44 [0.31-0.6]        | 0.95 [0.68-1.32]         | 115.91 | 10.37 [7.49-14.19]     | 7.29 [5.37-9.77]       | 0 [0 to 0]             |
| Mexico                           | Female | 346.5 [259.18-463.91]  | 1041.49 [775.68-1389.75] | 200.57 | 130.09 [97.28-174.43]  | 135.26 [101.86-178.7]  | 0.73 [0.58 to 0.89]    |
| Micronesia (Federated States of) | Female | 0.05 [0.04-0.07]       | 0.09 [0.06-0.12]         | 80     | 21.08 [15.62-28.72]    | 16.48 [12.2-22.43]     | 0 [0 to 0]             |
| Mongolia                         | Female | 8.11 [6.12-10.78]      | 24.04 [17.54-32.12]      | 196.42 | 134.75 [100.77-179.14] | 102.34 [77.3-135.9]    | 0 [0 to 0]             |
| Montenegro                       | Female | 2.01 [1.51-2.76]       | 2.67 [2.01-3.65]         | 32.84  | 58.15 [44.01-78.74]    | 53.41 [40.25-72.43]    | 0 [0 to 0]             |
| Morocco                          | Female | 55.03 [41.02-73.2]     | 124.65 [92.48-165.91]    | 126.51 | 66.8 [49.71-88.07]     | 47.98 [36.04-64.04]    | 0 [0 to 0]             |
| Mozambique                       | Female | 41.69 [31.45-54.97]    | 81.65 [61.77-107.43]     | 95.85  | 100.24 [76.12-130.42]  | 83.15 [63.5-108.99]    | 0 [0 to 0]             |
| Myanmar                          | Female | 13.57 [9.44-19.09]     | 28.76 [20.09-40.35]      | 111.94 | 10.37 [7.49-14.19]     | 7.48 [5.5-10.06]       | 0 [0 to 0]             |
| Namibia                          | Female | 4.71 [3.61-6.02]       | 10.68 [8.11-13.74]       | 126.75 | 110.4 [84.37-142]      | 97.53 [74.74-126.26]   | 0 [0 to 0]             |
| Nepal                            | Female | 31.99 [23.94-42.67]    | 74.03 [55.7-98.3]        | 131.42 | 56.21 [42.33-74.43]    | 43.37 [32.86-57.76]    | 0 [0 to 0]             |
| Netherlands                      | Female | 114.5 [92.96-138.59]   | 147.64 [112.59-200.91]   | 28.94  | 127.99 [104.35-155.2]  | 97.78 [74.21-130.92]   | -0.46 [-0.79 to -0.14] |
| New Zealand                      | Female | 46.62 [35.45-60.71]    | 81.58 [61.17-108.36]     | 74.99  | 262.18 [197.02-347.8]  | 180.45 [136.38-237.37] | 0 [0 to 0]             |
| Nicaragua                        | Female | 5.48 [4.13-7.32]       | 16.1 [12.04-21.64]       | 193.8  | 57.04 [42.87-76.75]    | 46.84 [35.39-62.57]    | 0 [0 to 0]             |
| Niger                            | Female | 19.28 [14.54-25.36]    | 54.88 [41.38-72.5]       | 184.65 | 100.24 [76.12-130.42]  | 82.49 [62.9-108.1]     | 0 [0 to 0]             |
| Nigeria                          | Female | 248.59 [190.96-325.51] | 702.12 [526.6-928.82]    | 182.44 | 108.46 [82.87-142.7]   | 90.05 [68.57-118.52]   | 0 [0 to 0]             |
| North Macedonia                  | Female | 6.1 [4.55-8.34]        | 8.93 [6.71-12.22]        | 46.39  | 58.15 [44.01-78.74]    | 53.2 [40.06-72.11]     | 0 [0 to 0]             |
| Northern Mariana Islands         | Female | 0.02 [0.02-0.03]       | 0.06 [0.04-0.09]         | 200    | 21.08 [15.62-28.72]    | 16.19 [12.04-22.07]    | 0 [0 to 0]             |
| Norway                           | Female | 62.6 [48.49-79.77]     | 90.5 [69.03-118.53]      | 44.57  | 254.48 [192.74-331.98] | 191.23 [145.29-251.52] | 0.22 [0.11 to 0.32]    |
| Oman                             | Female | 2.56 [1.92-3.41]       | 7.82 [5.78-10.35]        | 205.47 | 66.8 [49.71-88.07]     | 42.55 [31.98-57.01]    | 0 [0 to 0]             |
| Pakistan                         | Female | 187.53 [141.35-250.32] | 422.46 [317.07-564.85]   | 125.28 | 62.63 [47.77-83.63]    | 47.11 [36.01-62.97]    | 0 [0 to 0]             |



|                                  |        |                          |                           |        |                        |                        |                        |
|----------------------------------|--------|--------------------------|---------------------------|--------|------------------------|------------------------|------------------------|
| Palestine                        | Female | 3.58 [2.68-4.74]         | 10.8 [7.95-14.55]         | 201.68 | 66.8 [49.71-88.07]     | 47.73 [35.94-63.72]    | 0 [0 to 0]             |
| Panama                           | Female | 4.66 [3.51-6.23]         | 12.22 [9.2-16.48]         | 162.23 | 57.04 [42.87-76.75]    | 46.07 [34.87-61.56]    | 0 [0 to 0]             |
| Papua New Guinea                 | Female | 2.29 [1.65-3.15]         | 6.32 [4.51-8.72]          | 175.98 | 21.08 [15.62-28.72]    | 16.18 [12.04-21.94]    | 0 [0 to 0]             |
| Paraguay                         | Female | 6.85 [5.2-9.07]          | 16.74 [12.64-22.1]        | 144.38 | 54.39 [40.98-71.57]    | 40.8 [30.88-54.27]     | 0 [0 to 0]             |
| Peru                             | Female | 41.36 [30.94-55.3]       | 103.39 [77.05-138.35]     | 149.98 | 59.24 [44.16-78.79]    | 44.15 [33.22-59]       | 0.21 [0.08 to 0.35]    |
| Philippines                      | Female | 21.59 [15.77-29.76]      | 55.56 [40.68-75.11]       | 157.34 | 12.59 [9.4-16.66]      | 9.06 [6.83-11.99]      | 0 [0 to 0]             |
| Poland                           | Female | 149.8 [114.15-200.92]    | 202.18 [151.93-269.5]     | 34.97  | 64.49 [48.92-86.4]     | 59.27 [45.22-79.16]    | 0 [0 to 0]             |
| Portugal                         | Female | 131.24 [98.57-176.11]    | 175.36 [131.88-234.21]    | 33.62  | 207.97 [156.67-276.89] | 145.57 [109.47-195.24] | 0.34 [0.23 to 0.45]    |
| Puerto Rico                      | Female | 10.28 [7.8-13.51]        | 15.51 [11.64-20.49]       | 50.88  | 54.39 [40.98-71.57]    | 41.66 [31.56-55.22]    | 0 [0 to 0]             |
| Qatar                            | Female | 0.52 [0.37-0.69]         | 4.12 [2.94-5.56]          | 692.31 | 66.8 [49.71-88.07]     | 37.63 [28.19-50.68]    | 0 [0 to 0]             |
| Republic of Korea                | Female | 696.38 [525.75-908.3]    | 1401.16 [1039.79-1854.39] | 101.21 | 340.81 [258.39-445.56] | 196.59 [149.15-256.03] | 0.71 [0.44 to 0.98]    |
| Republic of Moldova              | Female | 35.55 [26.76-47.32]      | 39.62 [29.78-52.74]       | 11.45  | 140.74 [105.93-185.35] | 110.87 [84.11-144.5]   | 0 [0 to 0]             |
| Romania                          | Female | 84.5 [63.29-115.99]      | 91.59 [68.72-124.12]      | 8.39   | 58.15 [44.01-78.74]    | 53.46 [40.33-72.51]    | 0 [0 to 0]             |
| Russian Federation               | Female | 3078.2 [2359.67-3989.97] | 3346.15 [2570.61-4299.38] | 8.7    | 330.69 [254.52-424.62] | 268.42 [204.66-347.13] | -0.78 [-1 to -0.55]    |
| Rwanda                           | Female | 19.49 [14.84-25.45]      | 44.77 [34-58.89]          | 129.71 | 100.24 [76.12-130.42]  | 83.69 [63.93-109.68]   | 0 [0 to 0]             |
| Saint Lucia                      | Female | 0.25 [0.19-0.33]         | 0.62 [0.47-0.83]          | 148    | 54.39 [40.98-71.57]    | 40.95 [31.01-54.43]    | 0 [0 to 0]             |
| Saint Vincent and the Grenadines | Female | 0.19 [0.15-0.26]         | 0.36 [0.27-0.48]          | 89.47  | 54.39 [40.98-71.57]    | 40.24 [30.52-53.6]     | 0 [0 to 0]             |
| Samoa                            | Female | 0.1 [0.07-0.14]          | 0.17 [0.12-0.23]          | 70     | 21.08 [15.62-28.72]    | 16.27 [12.06-22.06]    | 0 [0 to 0]             |
| Sao Tome and Principe            | Female | 0.35 [0.26-0.45]         | 0.73 [0.55-0.97]          | 108.57 | 100.24 [76.12-130.42]  | 81.76 [62.43-107.22]   | 0 [0 to 0]             |
| Saudi Arabia                     | Female | 48.27 [35.92-62.82]      | 205.25 [149.21-270.23]    | 325.21 | 138.88 [103.64-181.42] | 107.25 [80.77-139.97]  | -0.47 [-0.66 to -0.28] |
| Senegal                          | Female | 20.3 [15.43-26.72]       | 49.29 [37.42-64.8]        | 142.81 | 100.24 [76.12-130.42]  | 82.43 [62.88-108.06]   | 0 [0 to 0]             |
| Serbia                           | Female | 35.53 [26.42-49.11]      | 38.41 [28.59-52.61]       | 8.11   | 58.15 [44.01-78.74]    | 53.35 [40.18-72.36]    | 0 [0 to 0]             |
| Seychelles                       | Female | 0.03 [0.02-0.04]         | 0.06 [0.04-0.09]          | 100    | 10.37 [7.49-14.19]     | 7.14 [5.25-9.55]       | 0 [0 to 0]             |
| Sierra Leone                     | Female | 11.08 [8.47-14.53]       | 23.88 [18.07-31.39]       | 115.52 | 100.24 [76.12-130.42]  | 81.32 [62-106.68]      | 0 [0 to 0]             |
| Singapore                        | Female | 43.34 [32.81-57.29]      | 112.3 [85-149.5]          | 159.11 | 282.18 [213.42-373.66] | 160.46 [122.17-211.42] | 0.39 [0.26 to 0.52]    |
| Slovakia                         | Female | 17.96 [13.58-24.21]      | 24.82 [18.68-33.54]       | 38.2   | 58.15 [44.01-78.74]    | 53.51 [40.36-72.57]    | 0 [0 to 0]             |

|                             |        |                        |                         |        |                        |                        |                       |
|-----------------------------|--------|------------------------|-------------------------|--------|------------------------|------------------------|-----------------------|
| Slovenia                    | Female | 7.5 [5.64-10.28]       | 9.95 [7.51-13.57]       | 32.67  | 58.15 [44.01-78.74]    | 53.28 [40.13-72.22]    | 0 [0 to 0]            |
| Solomon Islands             | Female | 0.16 [0.11-0.22]       | 0.42 [0.3-0.58]         | 162.5  | 21.08 [15.62-28.72]    | 16.27 [12.08-22.15]    | 0 [0 to 0]            |
| Somalia                     | Female | 20.71 [15.51-27.43]    | 52.93 [39.64-69.87]     | 155.58 | 100.24 [76.12-130.42]  | 83.06 [63.51-108.85]   | 0 [0 to 0]            |
| South Africa                | Female | 158.19 [120.8-204.7]   | 334.87 [256.49-437.12]  | 111.69 | 118.93 [90.73-154.88]  | 104.92 [80.12-137.23]  | 0 [0 to 0]            |
| South Sudan                 | Female | 13.36 [10.11-17.45]    | 28.67 [21.33-38.07]     | 114.6  | 100.24 [76.12-130.42]  | 81.47 [62.15-106.89]   | 0 [0 to 0]            |
| Spain                       | Female | 398.56 [302.54-522.16] | 840.7 [508.81-1421.41]  | 110.93 | 170.99 [129.98-224.05] | 168.99 [105.07-275.48] | 1.88 [1.5 to 2.27]    |
| Sri Lanka                   | Female | 6.26 [4.33-8.83]       | 14.27 [10.15-19.71]     | 127.96 | 10.37 [7.49-14.19]     | 7.39 [5.44-9.92]       | 0 [0 to 0]            |
| Sudan                       | Female | 36.2 [27.02-48.49]     | 82.09 [60.47-109.46]    | 126.77 | 66.8 [49.71-88.07]     | 47.11 [35.41-63.03]    | 0 [0 to 0]            |
| Suriname                    | Female | 0.81 [0.61-1.07]       | 1.83 [1.37-2.42]        | 125.93 | 54.39 [40.98-71.57]    | 41.16 [31.16-54.67]    | 0 [0 to 0]            |
| Sweden                      | Female | 55.62 [42.36-73.99]    | 69.15 [52.39-92.86]     | 24.33  | 93.9 [71.48-125.02]    | 79.55 [60.5-105.9]     | -0.19 [-0.57 to 0.18] |
| Switzerland                 | Female | 70.89 [53.39-94.17]    | 103.81 [77.6-138.7]     | 46.44  | 161.21 [119.81-213.68] | 135.6 [102.14-179.85]  | 0 [0 to 0]            |
| Syrian Arab Republic        | Female | 20.91 [15.56-28]       | 51.44 [37.74-69.11]     | 146.01 | 66.8 [49.71-88.07]     | 47.85 [35.96-63.88]    | 0 [0 to 0]            |
| Tajikistan                  | Female | 20.8 [15.56-27.83]     | 50.77 [37.11-67.84]     | 144.09 | 134.75 [100.77-179.14] | 100.93 [76.23-134.02]  | 0 [0 to 0]            |
| Thailand                    | Female | 21.45 [15.35-30.14]    | 56.75 [40.91-78.31]     | 164.57 | 10.08 [7.35-13.84]     | 7.31 [5.37-9.82]       | 0.14 [0.11 to 0.17]   |
| Timor-Leste                 | Female | 0.19 [0.13-0.27]       | 0.43 [0.3-0.59]         | 126.32 | 10.37 [7.49-14.19]     | 7.05 [5.18-9.51]       | 0 [0 to 0]            |
| Togo                        | Female | 9.43 [7.14-12.44]      | 28.57 [21.6-37.65]      | 202.97 | 100.24 [76.12-130.42]  | 83.2 [63.5-109.14]     | 0 [0 to 0]            |
| Tonga                       | Female | 0.07 [0.05-0.09]       | 0.09 [0.07-0.12]        | 28.57  | 21.08 [15.62-28.72]    | 16.58 [12.28-22.46]    | 0 [0 to 0]            |
| Trinidad and Tobago         | Female | 2.5 [1.9-3.3]          | 4.95 [3.74-6.52]        | 98     | 54.39 [40.98-71.57]    | 40.73 [30.84-54.16]    | 0 [0 to 0]            |
| Tunisia                     | Female | 18.8 [13.99-25.01]     | 46.5 [34.59-61.56]      | 147.34 | 66.8 [49.71-88.07]     | 48.23 [36.23-64.33]    | 0 [0 to 0]            |
| Turkey                      | Female | 43.57 [31.81-59.59]    | 100.67 [73.88-137.58]   | 131.05 | 21.02 [15.56-28.6]     | 14.52 [10.83-19.63]    | -0.1 [-0.25 to 0.04]  |
| Turkmenistan                | Female | 8.49 [6.67-11.24]      | 21.53 [15.9-29.1]       | 153.59 | 73.69 [58.58-96.78]    | 80.24 [60.74-107.03]   | 0.57 [0.41 to 0.74]   |
| Uganda                      | Female | 41.31 [31.39-54.44]    | 106.55 [80.83-140.28]   | 157.93 | 100.24 [76.12-130.42]  | 83.14 [63.49-109]      | 0 [0 to 0]            |
| Ukraine                     | Female | 457.33 [346.67-630.74] | 447.91 [340.78-609.78]  | -2.06  | 120.74 [91.86-160.09]  | 93.56 [71.72-123.95]   | 0.25 [0.09 to 0.4]    |
| United Arab Emirates        | Female | 1.87 [1.36-2.49]       | 18.05 [12.65-24.38]     | 865.24 | 66.8 [49.71-88.07]     | 37.63 [28.32-50.63]    | 0 [0 to 0]            |
| United Kingdom              | Female | 532.47 [407.53-710.08] | 745.56 [573.97-1002.32] | 40.02  | 143.28 [108.72-191.52] | 133.38 [101.72-177.72] | 0.22 [-0.23 to 0.67]  |
| United Republic of Tanzania | Female | 69.37 [52.79-91.25]    | 174.31 [131.53-229.78]  | 151.28 | 100.24 [76.12-130.42]  | 82.38 [62.86-108]      | 0 [0 to 0]            |

|                                       |        |                           |                            |        |                        |                        |                        |
|---------------------------------------|--------|---------------------------|----------------------------|--------|------------------------|------------------------|------------------------|
| United States of America              | Female | 4078.61 [3164.52-5185.12] | 7745.95 [5895.22-10101.08] | 89.92  | 293.2 [223.86-375.63]  | 281.4 [216.27-364.83]  | 0.66 [0.48 to 0.83]    |
| United States Virgin Islands          | Female | 0.3 [0.22-0.4]            | 0.45 [0.33-0.6]            | 50     | 54.39 [40.98-71.57]    | 41.71 [31.58-55.3]     | 0 [0 to 0]             |
| Uruguay                               | Female | 40.11 [30.11-52.98]       | 50.11 [37.74-65.99]        | 24.93  | 232.56 [174.38-306.32] | 161.01 [121.62-212.49] | 0 [0 to 0]             |
| Uzbekistan                            | Female | 87.53 [65.85-117.55]      | 215.44 [158.04-287.8]      | 146.13 | 134.75 [100.77-179.14] | 101.94 [77.04-135.39]  | 0 [0 to 0]             |
| Vanuatu                               | Female | 0.08 [0.06-0.1]           | 0.2 [0.15-0.27]            | 150    | 21.08 [15.62-28.72]    | 16.19 [12.06-22.01]    | 0 [0 to 0]             |
| Venezuela<br>(Bolivarian Republic of) | Female | 15.76 [11.66-21.21]       | 44.01 [32.88-59.58]        | 179.25 | 27.35 [20.34-37.11]    | 20.4 [15.28-27.78]     | -0.02 [-0.03 to -0.01] |
| VietNam                               | Female | 24.16 [17.26-33.51]       | 57.59 [40.76-80.41]        | 138.37 | 10.37 [7.49-14.19]     | 7.44 [5.49-9.95]       | 0 [0 to 0]             |
| Yemen                                 | Female | 20.67 [15.54-27.49]       | 60.9 [45.44-80.72]         | 194.63 | 66.8 [49.71-88.07]     | 48.06 [36.03-64.14]    | 0 [0 to 0]             |
| Zambia                                | Female | 19.3 [14.49-25.55]        | 49.59 [37.49-65.25]        | 156.94 | 100.24 [76.12-130.42]  | 81.64 [62.31-107.12]   | 0 [0 to 0]             |
| Zimbabwe                              | Female | 29.88 [22.72-38.42]       | 58.56 [44.51-75.27]        | 95.98  | 110.4 [84.37-142]      | 97.74 [74.9-126.64]    | 0 [0 to 0]             |

ASIR: age-standardized incidence; EAPCs: estimated annual percentage changes, CI: confidence interval; UI: Uncertainty interval.

## Supplementary Table S4. Age distribution of incidence (per 100,000) for hand osteoarthritis in different countries in 2019.

Supplementary Table S4. Age distribution of incidence (per 100,000) for osteoarthritis-hand in different countries in 2019.

| country             | sex    | <5 | 5 to 9 | 10 to 14 | 15 to 19 | 20 to 24 | 25 to 29 | 30 to 34 | 35 to 39 | 40 to 44 | 45 to 49 | 50 to 54 | 55 to 59 | 60 to 64 | 65 to 69 | 70 to 74 | 75 to 79 | 80 to 84 | 85 to 89 | 90 to 94 | 95+    |
|---------------------|--------|----|--------|----------|----------|----------|----------|----------|----------|----------|----------|----------|----------|----------|----------|----------|----------|----------|----------|----------|--------|
| Afghanistan         | Male   | 0  | 0      | 0        | 0        | 0        | 0        | 13.23    | 39.99    | 67.53    | 89.71    | 97.52    | 90.43    | 74.27    | 58.1     | 47.85    | 48.18    | 51.44    | 57.42    | 66.95    | 80.68  |
| Afghanistan         | Female | 0  | 0      | 0        | 0        | 0        | 0        | 19.49    | 68.7     | 143.36   | 223.28   | 259.91   | 238.92   | 185.34   | 132.9    | 98.16    | 86.22    | 87.37    | 100.92   | 122.47   | 147.21 |
| Albania             | Male   | 0  | 0      | 0        | 0        | 0        | 0        | 15.41    | 53.02    | 101.71   | 147.09   | 173.29   | 171.44   | 140.88   | 104.54   | 82.34    | 77.11    | 74.78    | 76.32    | 84.47    | 98.65  |
| Albania             | Female | 0  | 0      | 0        | 0        | 0        | 0        | 16.31    | 56.34    | 110.27   | 165.54   | 205.19   | 212.5    | 184.66   | 146.16   | 117.36   | 108.03   | 106.04   | 113.45   | 131.59   | 155.62 |
| Algeria             | Male   | 0  | 0      | 0        | 0        | 0        | 0        | 13.23    | 39.99    | 67.53    | 89.71    | 97.52    | 90.43    | 74.27    | 58.1     | 47.85    | 48.18    | 51.44    | 57.42    | 66.95    | 80.68  |
| Algeria             | Female | 0  | 0      | 0        | 0        | 0        | 0        | 19.49    | 68.7     | 143.36   | 223.28   | 259.91   | 238.92   | 185.34   | 132.9    | 98.16    | 86.22    | 87.37    | 100.92   | 122.47   | 147.21 |
| American Samoa      | Male   | 0  | 0      | 0        | 0        | 0        | 0        | 4.36     | 10.65    | 14.87    | 22.35    | 32.17    | 39.38    | 40.35    | 37.6     | 36.39    | 40.75    | 45.47    | 52.85    | 63.7     | 79.31  |
| American Samoa      | Female | 0  | 0      | 0        | 0        | 0        | 0        | 7.73     | 22.12    | 35.76    | 50.64    | 63.5     | 68.03    | 63.37    | 56.62    | 54.66    | 62.3     | 70.48    | 83.47    | 104.52   | 131.83 |
| Andorra             | Male   | 0  | 0      | 0        | 0        | 0        | 0        | 122.97   | 358.34   | 589.86   | 919.3    | 1267.93  | 1130.56  | 632.57   | 287.42   | 138.44   | 83.62    | 64.98    | 59.61    | 63.32    | 73.99  |
| Andorra             | Female | 0  | 0      | 0        | 0        | 0        | 0        | 52.68    | 171.66   | 338.66   | 551.11   | 691.52   | 638.6    | 445.89   | 271.49   | 173.11   | 128.06   | 108.63   | 105.53   | 113.91   | 129.92 |
| Angola              | Male   | 0  | 0      | 0        | 0        | 0        | 0        | 28.81    | 100.47   | 179.18   | 219.94   | 215.43   | 182.85   | 136.22   | 98.79    | 79.04    | 76.57    | 76.51    | 79.01    | 86.75    | 100.22 |
| Angola              | Female | 0  | 0      | 0        | 0        | 0        | 0        | 37.57    | 140.34   | 267.59   | 343.87   | 351.39   | 311.02   | 238.73   | 176.47   | 138.2    | 122.79   | 119.35   | 126.6    | 141.38   | 162.55 |
| Antigua and Barbuda | Male   | 0  | 0      | 0        | 0        | 0        | 0        | 9.64     | 30.84    | 54.33    | 75.84    | 89.95    | 89.88    | 76.32    | 61.7     | 54.81    | 59.52    | 65.62    | 73.19    | 84.05    | 100.02 |
| Antigua and Barbuda | Female | 0  | 0      | 0        | 0        | 0        | 0        | 15.17    | 54.74    | 110.24   | 163.85   | 192.97   | 189.52   | 159.44   | 124.96   | 104.56   | 102.52   | 105.99   | 119.89   | 141.44   | 165.86 |
| Argentina           | Male   | 0  | 0      | 0        | 0        | 0        | 0        | 28.21    | 89.98    | 163.3    | 241.06   | 310.76   | 332.12   | 274.99   | 189.13   | 125.51   | 95.53    | 82       | 77.84    | 82.59    | 93.46  |
| Argentina           | Female | 0  | 0      | 0        | 0        | 0        | 0        | 67.37    | 270.3    | 610.21   | 940.34   | 1040.86  | 828.82   | 486.5    | 253.62   | 148.16   | 110.62   | 99.69    | 104.1    | 117.8    | 136.04 |
| Armenia             | Male   | 0  | 0      | 0        | 0        | 0        | 0        | 22.44    | 79.13    | 150.54   | 206.35   | 231.16   | 224.19   | 188.63   | 144.76   | 108.49   | 90.96    | 81.68    | 79.72    | 86.4     | 100.81 |
| Armenia             | Female | 0  | 0      | 0        | 0        | 0        | 0        | 33.29    | 135.15   | 304.33   | 468.78   | 541.1    | 504.41   | 383.85   | 254.29   | 167.89   | 127.79   | 114.46   | 119.59   | 136.6    | 159.85 |
| Australia           | Male   | 0  | 0      | 0        | 0        | 0        | 0        | 28.21    | 89.98    | 163.3    | 241.06   | 310.76   | 332.12   | 274.99   | 189.13   | 125.51   | 95.53    | 82       | 77.84    | 82.59    | 93.46  |
| Australia           | Female | 0  | 0      | 0        | 0        | 0        | 0        | 64.77    | 271.28   | 655.49   | 1060.91  | 1188.98  | 920.98   | 512.04   | 253.67   | 145.18   | 107.42   | 96.24    | 100.48   | 112.89   | 130.19 |
| Austria             | Male   | 0  | 0      | 0        | 0        | 0        | 0        | 110.01   | 319.3    | 527.48   | 810.36   | 1119.99  | 1031.47  | 606.59   | 289.78   | 143.73   | 88.61    | 68.43    | 61.8     | 64.74    | 74.17  |
| Austria             | Female | 0  | 0      | 0        | 0        | 0        | 0        | 52.68    | 171.66   | 338.66   | 551.11   | 691.52   | 638.6    | 445.89   | 271.49   | 173.11   | 128.06   | 108.63   | 105.53   | 113.91   | 129.92 |
| Azerbaijan          | Male   | 0  | 0      | 0        | 0        | 0        | 0        | 19.93    | 69.26    | 129.63   | 177.74   | 201.92   | 199.27   | 169.93   | 132.8    | 102.62   | 87.66    | 78.78    | 77.62    | 86.32    | 103.09 |
| Azerbaijan          | Female | 0  | 0      | 0        | 0        | 0        | 0        | 40.23    | 166.78   | 384.2    | 595.1    | 682.08   | 616.4    | 441.36   | 274.88   | 173.56   | 127.56   | 112.19   | 116.21   | 131.79   | 152.57 |
| Bahamas             | Male   | 0  | 0      | 0        | 0        | 0        | 0        | 9.64     | 30.84    | 54.33    | 75.84    | 89.95    | 89.88    | 76.32    | 61.7     | 54.81    | 59.52    | 65.62    | 73.19    | 84.05    | 100.02 |
| Bahamas             | Female | 0  | 0      | 0        | 0        | 0        | 0        | 15.17    | 54.74    | 110.24   | 163.85   | 192.97   | 189.52   | 159.44   | 124.96   | 104.56   | 102.52   | 105.99   | 119.89   | 141.44   | 165.86 |
| Bahrain             | Male   | 0  | 0      | 0        | 0        | 0        | 0        | 13.23    | 39.99    | 67.53    | 89.71    | 97.52    | 90.43    | 74.27    | 58.1     | 47.85    | 48.18    | 51.44    | 57.42    | 66.95    | 80.68  |

|                                  |        |   |   |   |   |   |   |       |        |        |        |         |        |        |        |        |        |        |        |        |        |
|----------------------------------|--------|---|---|---|---|---|---|-------|--------|--------|--------|---------|--------|--------|--------|--------|--------|--------|--------|--------|--------|
| Bahrain                          | Female | 0 | 0 | 0 | 0 | 0 | 0 | 19.49 | 68.7   | 143.36 | 223.28 | 259.91  | 238.92 | 185.34 | 132.9  | 98.16  | 86.22  | 87.37  | 100.92 | 122.47 | 147.21 |
| Bangladesh                       | Male   | 0 | 0 | 0 | 0 | 0 | 0 | 10.3  | 32.23  | 56.19  | 78.75  | 94.37   | 96.7   | 84.7   | 69.74  | 62.26  | 66.26  | 70.58  | 75.56  | 84.16  | 99.57  |
| Bangladesh                       | Female | 0 | 0 | 0 | 0 | 0 | 0 | 16.31 | 57.17  | 111.43 | 161.42 | 191.83  | 195.03 | 170.6  | 138.37 | 116.81 | 114.17 | 116.75 | 126.39 | 142.86 | 165.84 |
| Barbados                         | Male   | 0 | 0 | 0 | 0 | 0 | 0 | 9.64  | 30.84  | 54.33  | 75.84  | 89.95   | 89.88  | 76.32  | 61.7   | 54.81  | 59.52  | 65.62  | 73.19  | 84.05  | 100.02 |
| Barbados                         | Female | 0 | 0 | 0 | 0 | 0 | 0 | 15.17 | 54.74  | 110.24 | 163.85 | 192.97  | 189.52 | 159.44 | 124.96 | 104.56 | 102.52 | 105.99 | 119.89 | 141.44 | 165.86 |
| Belarus                          | Male   | 0 | 0 | 0 | 0 | 0 | 0 | 31.46 | 105    | 190.52 | 254.31 | 275.2   | 252.28 | 197.24 | 140.34 | 99.62  | 82     | 75.4   | 77.3   | 85.72  | 99.94  |
| Belarus                          | Female | 0 | 0 | 0 | 0 | 0 | 0 | 44.02 | 164.39 | 334.35 | 480.97 | 546.03  | 509.01 | 387.03 | 258.05 | 169.54 | 128.51 | 114.26 | 118.43 | 135.14 | 156.66 |
| Belgium                          | Male   | 0 | 0 | 0 | 0 | 0 | 0 | 82.53 | 231.88 | 374.83 | 573.57 | 801.51  | 802.69 | 536.04 | 279.81 | 145.94 | 91.46  | 71.43  | 65.8   | 70.45  | 82.36  |
| Belgium                          | Female | 0 | 0 | 0 | 0 | 0 | 0 | 52.68 | 171.66 | 338.66 | 551.11 | 691.52  | 638.6  | 445.89 | 271.49 | 173.11 | 128.06 | 108.63 | 105.53 | 113.91 | 129.92 |
| Belize                           | Male   | 0 | 0 | 0 | 0 | 0 | 0 | 9.64  | 30.84  | 54.33  | 75.84  | 89.95   | 89.88  | 76.32  | 61.7   | 54.81  | 59.52  | 65.62  | 73.19  | 84.05  | 100.02 |
| Belize                           | Female | 0 | 0 | 0 | 0 | 0 | 0 | 15.17 | 54.74  | 110.24 | 163.85 | 192.97  | 189.52 | 159.44 | 124.96 | 104.56 | 102.52 | 105.99 | 119.89 | 141.44 | 165.86 |
| Benin                            | Male   | 0 | 0 | 0 | 0 | 0 | 0 | 28.81 | 100.47 | 179.18 | 219.94 | 215.43  | 182.85 | 136.22 | 98.79  | 79.04  | 76.57  | 76.51  | 79.01  | 86.75  | 100.22 |
| Benin                            | Female | 0 | 0 | 0 | 0 | 0 | 0 | 37.57 | 140.34 | 267.59 | 343.87 | 351.39  | 311.02 | 238.73 | 176.47 | 138.2  | 122.79 | 119.35 | 126.6  | 141.38 | 162.55 |
| Bermuda                          | Male   | 0 | 0 | 0 | 0 | 0 | 0 | 9.64  | 30.84  | 54.33  | 75.84  | 89.95   | 89.88  | 76.32  | 61.7   | 54.81  | 59.52  | 65.62  | 73.19  | 84.05  | 100.02 |
| Bermuda                          | Female | 0 | 0 | 0 | 0 | 0 | 0 | 15.17 | 54.74  | 110.24 | 163.85 | 192.97  | 189.52 | 159.44 | 124.96 | 104.56 | 102.52 | 105.99 | 119.89 | 141.44 | 165.86 |
| Bhutan                           | Male   | 0 | 0 | 0 | 0 | 0 | 0 | 10.3  | 32.23  | 56.19  | 78.75  | 94.37   | 96.7   | 84.7   | 69.74  | 62.26  | 66.26  | 70.58  | 75.56  | 84.16  | 99.57  |
| Bhutan                           | Female | 0 | 0 | 0 | 0 | 0 | 0 | 16.31 | 57.17  | 111.43 | 161.42 | 191.83  | 195.03 | 170.6  | 138.37 | 116.81 | 114.17 | 116.75 | 126.39 | 142.86 | 165.84 |
| Bolivia (Plurinational State of) | Male   | 0 | 0 | 0 | 0 | 0 | 0 | 10.95 | 36.11  | 67.23  | 96.89  | 113.42  | 109.51 | 90.34  | 71.57  | 61.3   | 62.28  | 64.9   | 71.09  | 84.17  | 103.94 |
| Bolivia (Plurinational State of) | Female | 0 | 0 | 0 | 0 | 0 | 0 | 21.87 | 82.82  | 181.28 | 283.45 | 331.74  | 305.64 | 234.26 | 169.6  | 129.27 | 112.91 | 108.99 | 118.83 | 140.65 | 168.52 |
| Bosnia and Herzegovina           | Male   | 0 | 0 | 0 | 0 | 0 | 0 | 15.41 | 53.02  | 101.71 | 147.09 | 173.29  | 171.44 | 140.88 | 104.54 | 82.34  | 77.11  | 74.78  | 76.32  | 84.47  | 98.65  |
| Bosnia and Herzegovina           | Female | 0 | 0 | 0 | 0 | 0 | 0 | 16.31 | 56.34  | 110.27 | 165.54 | 205.19  | 212.5  | 184.66 | 146.16 | 117.36 | 108.03 | 106.04 | 113.45 | 131.59 | 155.62 |
| Botswana                         | Male   | 0 | 0 | 0 | 0 | 0 | 0 | 49.38 | 164.05 | 267    | 295.79 | 263.29  | 205.58 | 142.41 | 97.55  | 76.13  | 73.35  | 74.27  | 77.94  | 85.3   | 97.85  |
| Botswana                         | Female | 0 | 0 | 0 | 0 | 0 | 0 | 55.57 | 195.99 | 335.88 | 383.13 | 355.75  | 299.25 | 226.68 | 167.8  | 131.69 | 118.01 | 114.99 | 123.73 | 139.65 | 161.55 |
| Brazil                           | Male   | 0 | 0 | 0 | 0 | 0 | 0 | 10.48 | 33.16  | 58.49  | 80.62  | 94.59   | 96.53  | 86.7   | 76.49  | 74.68  | 85.87  | 95.7   | 107.14 | 123.07 | 143.23 |
| Brazil                           | Female | 0 | 0 | 0 | 0 | 0 | 0 | 15.89 | 58.09  | 118.54 | 171.76 | 197.35  | 198.13 | 178    | 155.41 | 143.57 | 149.73 | 158.75 | 173.77 | 196.3  | 225.64 |
| Brunei Darussalam                | Male   | 0 | 0 | 0 | 0 | 0 | 0 | 14.15 | 42.89  | 77.43  | 124.64 | 180.63  | 220.76 | 213.1  | 168.41 | 121.21 | 92.91  | 77.85  | 73.03  | 78.46  | 91.37  |
| Brunei Darussalam                | Female | 0 | 0 | 0 | 0 | 0 | 0 | 75.79 | 329.86 | 785.05 | 1218.5 | 1293.48 | 970.21 | 540.33 | 263.33 | 140.06 | 96.18  | 85.35  | 92.21  | 107.9  | 127.52 |
| Bulgaria                         | Male   | 0 | 0 | 0 | 0 | 0 | 0 | 15.41 | 53.02  | 101.71 | 147.09 | 173.29  | 171.44 | 140.88 | 104.54 | 82.34  | 77.11  | 74.78  | 76.32  | 84.47  | 98.65  |
| Bulgaria                         | Female | 0 | 0 | 0 | 0 | 0 | 0 | 16.31 | 56.34  | 110.27 | 165.54 | 205.19  | 212.5  | 184.66 | 146.16 | 117.36 | 108.03 | 106.04 | 113.45 | 131.59 | 155.62 |
| Burkina Faso                     | Male   | 0 | 0 | 0 | 0 | 0 | 0 | 28.81 | 100.47 | 179.18 | 219.94 | 215.43  | 182.85 | 136.22 | 98.79  | 79.04  | 76.57  | 76.51  | 79.01  | 86.75  | 100.22 |

|                          |        |   |   |   |   |   |   |        |        |        |         |         |         |        |        |        |        |        |        |        |        |
|--------------------------|--------|---|---|---|---|---|---|--------|--------|--------|---------|---------|---------|--------|--------|--------|--------|--------|--------|--------|--------|
| Burkina Faso             | Female | 0 | 0 | 0 | 0 | 0 | 0 | 37.57  | 140.34 | 267.59 | 343.87  | 351.39  | 311.02  | 238.73 | 176.47 | 138.2  | 122.79 | 119.35 | 126.6  | 141.38 | 162.55 |
| Burundi                  | Male   | 0 | 0 | 0 | 0 | 0 | 0 | 28.81  | 100.47 | 179.18 | 219.94  | 215.43  | 182.85  | 136.22 | 98.79  | 79.04  | 76.57  | 76.51  | 79.01  | 86.75  | 100.22 |
| Burundi                  | Female | 0 | 0 | 0 | 0 | 0 | 0 | 37.57  | 140.34 | 267.59 | 343.87  | 351.39  | 311.02  | 238.73 | 176.47 | 138.2  | 122.79 | 119.35 | 126.6  | 141.38 | 162.55 |
| Cabo Verde               | Male   | 0 | 0 | 0 | 0 | 0 | 0 | 28.81  | 100.47 | 179.18 | 219.94  | 215.43  | 182.85  | 136.22 | 98.79  | 79.04  | 76.57  | 76.51  | 79.01  | 86.75  | 100.22 |
| Cabo Verde               | Female | 0 | 0 | 0 | 0 | 0 | 0 | 37.57  | 140.34 | 267.59 | 343.87  | 351.39  | 311.02  | 238.73 | 176.47 | 138.2  | 122.79 | 119.35 | 126.6  | 141.38 | 162.55 |
| Cambodia                 | Male   | 0 | 0 | 0 | 0 | 0 | 0 | 1.91   | 4.29   | 5.37   | 6.75    | 8.71    | 10.32   | 10.91  | 11.3   | 12.27  | 16.11  | 20.37  | 27.04  | 37.19  | 52.19  |
| Cambodia                 | Female | 0 | 0 | 0 | 0 | 0 | 0 | 4.04   | 10.17  | 13.98  | 20      | 26.9    | 31.14   | 32.38  | 31.57  | 32.36  | 40.1   | 49.06  | 62.43  | 82.34  | 109.8  |
| Cameroon                 | Male   | 0 | 0 | 0 | 0 | 0 | 0 | 28.81  | 100.47 | 179.18 | 219.94  | 215.43  | 182.85  | 136.22 | 98.79  | 79.04  | 76.57  | 76.51  | 79.01  | 86.75  | 100.22 |
| Cameroon                 | Female | 0 | 0 | 0 | 0 | 0 | 0 | 37.57  | 140.34 | 267.59 | 343.87  | 351.39  | 311.02  | 238.73 | 176.47 | 138.2  | 122.79 | 119.35 | 126.6  | 141.38 | 162.55 |
| Canada                   | Male   | 0 | 0 | 0 | 0 | 0 | 0 | 83.35  | 197.72 | 291.19 | 476.33  | 704.77  | 757.55  | 515.3  | 238.82 | 118.49 | 81.45  | 69.13  | 65.9   | 70.63  | 81.87  |
| Canada                   | Female | 0 | 0 | 0 | 0 | 0 | 0 | 120.45 | 352.35 | 696.56 | 1216.94 | 1447.62 | 1055.06 | 491.98 | 190.46 | 97.47  | 75.62  | 74.51  | 84.34  | 98.26  | 115    |
| Central African Republic | Male   | 0 | 0 | 0 | 0 | 0 | 0 | 28.81  | 100.47 | 179.18 | 219.94  | 215.43  | 182.85  | 136.22 | 98.79  | 79.04  | 76.57  | 76.51  | 79.01  | 86.75  | 100.22 |
| Central African Republic | Female | 0 | 0 | 0 | 0 | 0 | 0 | 37.57  | 140.34 | 267.59 | 343.87  | 351.39  | 311.02  | 238.73 | 176.47 | 138.2  | 122.79 | 119.35 | 126.6  | 141.38 | 162.55 |
| Chad                     | Male   | 0 | 0 | 0 | 0 | 0 | 0 | 28.81  | 100.47 | 179.18 | 219.94  | 215.43  | 182.85  | 136.22 | 98.79  | 79.04  | 76.57  | 76.51  | 79.01  | 86.75  | 100.22 |
| Chad                     | Female | 0 | 0 | 0 | 0 | 0 | 0 | 37.57  | 140.34 | 267.59 | 343.87  | 351.39  | 311.02  | 238.73 | 176.47 | 138.2  | 122.79 | 119.35 | 126.6  | 141.38 | 162.55 |
| Chile                    | Male   | 0 | 0 | 0 | 0 | 0 | 0 | 28.21  | 89.98  | 163.3  | 241.06  | 310.76  | 332.12  | 274.99 | 189.13 | 125.51 | 95.53  | 82     | 77.84  | 82.59  | 93.46  |
| Chile                    | Female | 0 | 0 | 0 | 0 | 0 | 0 | 67.37  | 270.3  | 610.21 | 940.34  | 1040.86 | 828.82  | 486.5  | 253.62 | 148.16 | 110.62 | 99.69  | 104.1  | 117.8  | 136.04 |
| China                    | Male   | 0 | 0 | 0 | 0 | 0 | 0 | 12.75  | 42.66  | 82.42  | 129.87  | 177.17  | 208.23  | 198.53 | 162.86 | 131.59 | 117.69 | 110.32 | 110.46 | 117.67 | 131.18 |
| China                    | Female | 0 | 0 | 0 | 0 | 0 | 0 | 16.65  | 58.76  | 112.93 | 154.78  | 168.42  | 161.69  | 139.67 | 119.36 | 112.76 | 121.05 | 130.74 | 145.46 | 164.7  | 189.92 |
| Colombia                 | Male   | 0 | 0 | 0 | 0 | 0 | 0 | 10.8   | 37.46  | 73.64  | 108.58  | 126     | 119     | 96.28  | 74.93  | 63.16  | 63.51  | 65.71  | 71.53  | 83.61  | 102.71 |
| Colombia                 | Female | 0 | 0 | 0 | 0 | 0 | 0 | 13.91  | 51.29  | 111.96 | 178.35  | 215.15  | 206.04  | 167.22 | 129.49 | 104.94 | 98.92  | 100.33 | 112.98 | 137.22 | 165.48 |
| Comoros                  | Male   | 0 | 0 | 0 | 0 | 0 | 0 | 28.81  | 100.47 | 179.18 | 219.94  | 215.43  | 182.85  | 136.22 | 98.79  | 79.04  | 76.57  | 76.51  | 79.01  | 86.75  | 100.22 |
| Comoros                  | Female | 0 | 0 | 0 | 0 | 0 | 0 | 37.57  | 140.34 | 267.59 | 343.87  | 351.39  | 311.02  | 238.73 | 176.47 | 138.2  | 122.79 | 119.35 | 126.6  | 141.38 | 162.55 |
| Congo                    | Male   | 0 | 0 | 0 | 0 | 0 | 0 | 28.81  | 100.47 | 179.18 | 219.94  | 215.43  | 182.85  | 136.22 | 98.79  | 79.04  | 76.57  | 76.51  | 79.01  | 86.75  | 100.22 |
| Congo                    | Female | 0 | 0 | 0 | 0 | 0 | 0 | 37.57  | 140.34 | 267.59 | 343.87  | 351.39  | 311.02  | 238.73 | 176.47 | 138.2  | 122.79 | 119.35 | 126.6  | 141.38 | 162.55 |
| Costa Rica               | Male   | 0 | 0 | 0 | 0 | 0 | 0 | 10.8   | 37.46  | 73.64  | 108.58  | 126     | 119     | 96.28  | 74.93  | 63.16  | 63.51  | 65.71  | 71.53  | 83.61  | 102.71 |
| Costa Rica               | Female | 0 | 0 | 0 | 0 | 0 | 0 | 13.91  | 51.29  | 111.96 | 178.35  | 215.15  | 206.04  | 167.22 | 129.49 | 104.94 | 98.92  | 100.33 | 112.98 | 137.22 | 165.48 |
| Côte d'Ivoire            | Male   | 0 | 0 | 0 | 0 | 0 | 0 | 28.81  | 100.47 | 179.18 | 219.94  | 215.43  | 182.85  | 136.22 | 98.79  | 79.04  | 76.57  | 76.51  | 79.01  | 86.75  | 100.22 |
| Côte d'Ivoire            | Female | 0 | 0 | 0 | 0 | 0 | 0 | 37.57  | 140.34 | 267.59 | 343.87  | 351.39  | 311.02  | 238.73 | 176.47 | 138.2  | 122.79 | 119.35 | 126.6  | 141.38 | 162.55 |
| Croatia                  | Male   | 0 | 0 | 0 | 0 | 0 | 0 | 15.41  | 53.02  | 101.71 | 147.09  | 173.29  | 171.44  | 140.88 | 104.54 | 82.34  | 77.11  | 74.78  | 76.32  | 84.47  | 98.65  |

|                                       |        |   |   |   |   |   |   |       |        |        |        |        |        |        |        |        |        |        |        |        |        |
|---------------------------------------|--------|---|---|---|---|---|---|-------|--------|--------|--------|--------|--------|--------|--------|--------|--------|--------|--------|--------|--------|
| Croatia                               | Female | 0 | 0 | 0 | 0 | 0 | 0 | 16.31 | 56.34  | 110.27 | 165.54 | 205.19 | 212.5  | 184.66 | 146.16 | 117.36 | 108.03 | 106.04 | 113.45 | 131.59 | 155.62 |
| Cuba                                  | Male   | 0 | 0 | 0 | 0 | 0 | 0 | 9.64  | 30.84  | 54.33  | 75.84  | 89.95  | 89.88  | 76.32  | 61.7   | 54.81  | 59.52  | 65.62  | 73.19  | 84.05  | 100.02 |
| Cuba                                  | Female | 0 | 0 | 0 | 0 | 0 | 0 | 15.17 | 54.74  | 110.24 | 163.85 | 192.97 | 189.52 | 159.44 | 124.96 | 104.56 | 102.52 | 105.99 | 119.89 | 141.44 | 165.86 |
| Cyprus                                | Male   | 0 | 0 | 0 | 0 | 0 | 0 | 96.36 | 273.88 | 443.54 | 680.24 | 957.53 | 923.86 | 576.32 | 285.2  | 144.96 | 91.1   | 70.33  | 63.75  | 67.65  | 78.18  |
| Cyprus                                | Female | 0 | 0 | 0 | 0 | 0 | 0 | 52.68 | 171.66 | 338.66 | 551.11 | 691.52 | 638.6  | 445.89 | 271.49 | 173.11 | 128.06 | 108.63 | 105.53 | 113.91 | 129.92 |
| Czechia                               | Male   | 0 | 0 | 0 | 0 | 0 | 0 | 15.41 | 53.02  | 101.71 | 147.09 | 173.29 | 171.44 | 140.88 | 104.54 | 82.34  | 77.11  | 74.78  | 76.32  | 84.47  | 98.65  |
| Czechia                               | Female | 0 | 0 | 0 | 0 | 0 | 0 | 16.31 | 56.34  | 110.27 | 165.54 | 205.19 | 212.5  | 184.66 | 146.16 | 117.36 | 108.03 | 106.04 | 113.45 | 131.59 | 155.62 |
| Democratic People's Republic of Korea | Male   | 0 | 0 | 0 | 0 | 0 | 0 | 12.04 | 37.39  | 67.59  | 109.27 | 167.86 | 212.48 | 195.79 | 139.72 | 94.9   | 76.98  | 69.93  | 68.86  | 75.05  | 87.97  |
| Democratic People's Republic of Korea | Female | 0 | 0 | 0 | 0 | 0 | 0 | 16.47 | 56.38  | 105.66 | 144.64 | 158.52 | 148.37 | 121.15 | 94.77  | 81.04  | 83.01  | 88.08  | 99.19  | 117.35 | 140.3  |
| Democratic Republic of the Congo      | Male   | 0 | 0 | 0 | 0 | 0 | 0 | 28.81 | 100.47 | 179.18 | 219.94 | 215.43 | 182.85 | 136.22 | 98.79  | 79.04  | 76.57  | 76.51  | 79.01  | 86.75  | 100.22 |
| Democratic Republic of the Congo      | Female | 0 | 0 | 0 | 0 | 0 | 0 | 37.57 | 140.34 | 267.59 | 343.87 | 351.39 | 311.02 | 238.73 | 176.47 | 138.2  | 122.79 | 119.35 | 126.6  | 141.38 | 162.55 |
| Denmark                               | Male   | 0 | 0 | 0 | 0 | 0 | 0 | 69.65 | 191.48 | 304.64 | 464.28 | 656.52 | 675.61 | 473.65 | 264.17 | 143.54 | 92.59  | 73.88  | 68.26  | 72.37  | 84.69  |
| Denmark                               | Female | 0 | 0 | 0 | 0 | 0 | 0 | 70.72 | 238.01 | 480.7  | 784.26 | 965.43 | 833.45 | 524.75 | 292.4  | 176.52 | 125.82 | 104.93 | 101.5  | 108.43 | 122.37 |
| Djibouti                              | Male   | 0 | 0 | 0 | 0 | 0 | 0 | 28.81 | 100.47 | 179.18 | 219.94 | 215.43 | 182.85 | 136.22 | 98.79  | 79.04  | 76.57  | 76.51  | 79.01  | 86.75  | 100.22 |
| Djibouti                              | Female | 0 | 0 | 0 | 0 | 0 | 0 | 37.57 | 140.34 | 267.59 | 343.87 | 351.39 | 311.02 | 238.73 | 176.47 | 138.2  | 122.79 | 119.35 | 126.6  | 141.38 | 162.55 |
| Dominica                              | Male   | 0 | 0 | 0 | 0 | 0 | 0 | 9.64  | 30.84  | 54.33  | 75.84  | 89.95  | 89.88  | 76.32  | 61.7   | 54.81  | 59.52  | 65.62  | 73.19  | 84.05  | 100.02 |
| Dominica                              | Female | 0 | 0 | 0 | 0 | 0 | 0 | 15.17 | 54.74  | 110.24 | 163.85 | 192.97 | 189.52 | 159.44 | 124.96 | 104.56 | 102.52 | 105.99 | 119.89 | 141.44 | 165.86 |
| Dominican Republic                    | Male   | 0 | 0 | 0 | 0 | 0 | 0 | 9.64  | 30.84  | 54.33  | 75.84  | 89.95  | 89.88  | 76.32  | 61.7   | 54.81  | 59.52  | 65.62  | 73.19  | 84.05  | 100.02 |
| Dominican Republic                    | Female | 0 | 0 | 0 | 0 | 0 | 0 | 15.17 | 54.74  | 110.24 | 163.85 | 192.97 | 189.52 | 159.44 | 124.96 | 104.56 | 102.52 | 105.99 | 119.89 | 141.44 | 165.86 |
| Ecuador                               | Male   | 0 | 0 | 0 | 0 | 0 | 0 | 15.3  | 47.86  | 89.31  | 131.81 | 151.56 | 139.47 | 106.56 | 78.01  | 64.52  | 63     | 64.85  | 71.74  | 84.69  | 103.51 |
| Ecuador                               | Female | 0 | 0 | 0 | 0 | 0 | 0 | 43.74 | 143.52 | 313.36 | 545.17 | 649.55 | 519.13 | 316    | 192    | 135.33 | 113.22 | 106.59 | 114.48 | 131.92 | 155.99 |
| Egypt                                 | Male   | 0 | 0 | 0 | 0 | 0 | 0 | 13.23 | 39.99  | 67.53  | 89.71  | 97.52  | 90.43  | 74.27  | 58.1   | 47.85  | 48.18  | 51.44  | 57.42  | 66.95  | 80.68  |
| Egypt                                 | Female | 0 | 0 | 0 | 0 | 0 | 0 | 19.49 | 68.7   | 143.36 | 223.28 | 259.91 | 238.92 | 185.34 | 132.9  | 98.16  | 86.22  | 87.37  | 100.92 | 122.47 | 147.21 |
| El Salvador                           | Male   | 0 | 0 | 0 | 0 | 0 | 0 | 10.8  | 37.46  | 73.64  | 108.58 | 126    | 119    | 96.28  | 74.93  | 63.16  | 63.51  | 65.71  | 71.53  | 83.61  | 102.71 |
| El Salvador                           | Female | 0 | 0 | 0 | 0 | 0 | 0 | 13.91 | 51.29  | 111.96 | 178.35 | 215.15 | 206.04 | 167.22 | 129.49 | 104.94 | 98.92  | 100.33 | 112.98 | 137.22 | 165.48 |
| Equatorial Guinea                     | Male   | 0 | 0 | 0 | 0 | 0 | 0 | 28.81 | 100.47 | 179.18 | 219.94 | 215.43 | 182.85 | 136.22 | 98.79  | 79.04  | 76.57  | 76.51  | 79.01  | 86.75  | 100.22 |
| Equatorial Guinea                     | Female | 0 | 0 | 0 | 0 | 0 | 0 | 37.57 | 140.34 | 267.59 | 343.87 | 351.39 | 311.02 | 238.73 | 176.47 | 138.2  | 122.79 | 119.35 | 126.6  | 141.38 | 162.55 |
| Eritrea                               | Male   | 0 | 0 | 0 | 0 | 0 | 0 | 28.81 | 100.47 | 179.18 | 219.94 | 215.43 | 182.85 | 136.22 | 98.79  | 79.04  | 76.57  | 76.51  | 79.01  | 86.75  | 100.22 |
| Eritrea                               | Female | 0 | 0 | 0 | 0 | 0 | 0 | 37.57 | 140.34 | 267.59 | 343.87 | 351.39 | 311.02 | 238.73 | 176.47 | 138.2  | 122.79 | 119.35 | 126.6  | 141.38 | 162.55 |
| Estonia                               | Male   | 0 | 0 | 0 | 0 | 0 | 0 | 31.46 | 105    | 190.52 | 254.31 | 275.2  | 252.28 | 197.24 | 140.34 | 99.62  | 82     | 75.4   | 77.3   | 85.72  | 99.94  |

|           |        |   |   |   |   |   |   |        |        |        |         |         |         |        |        |        |        |        |        |        |        |
|-----------|--------|---|---|---|---|---|---|--------|--------|--------|---------|---------|---------|--------|--------|--------|--------|--------|--------|--------|--------|
| Estonia   | Female | 0 | 0 | 0 | 0 | 0 | 0 | 44.02  | 164.39 | 334.35 | 480.97  | 546.03  | 509.01  | 387.03 | 258.05 | 169.54 | 128.51 | 114.26 | 118.43 | 135.14 | 156.66 |
| Eswatini  | Male   | 0 | 0 | 0 | 0 | 0 | 0 | 49.38  | 164.05 | 267    | 295.79  | 263.29  | 205.58  | 142.41 | 97.55  | 76.13  | 73.35  | 74.27  | 77.94  | 85.3   | 97.85  |
| Eswatini  | Female | 0 | 0 | 0 | 0 | 0 | 0 | 55.57  | 195.99 | 335.88 | 383.13  | 355.75  | 299.25  | 226.68 | 167.8  | 131.69 | 118.01 | 114.99 | 123.73 | 139.65 | 161.55 |
| Ethiopia  | Male   | 0 | 0 | 0 | 0 | 0 | 0 | 26.21  | 97.44  | 184.04 | 230.17  | 226.79  | 200.14  | 160.41 | 128.29 | 112.49 | 112.8  | 114.94 | 119.9  | 129.05 | 143.74 |
| Ethiopia  | Female | 0 | 0 | 0 | 0 | 0 | 0 | 33.11  | 132.58 | 270.09 | 358.41  | 369.18  | 334.56  | 275.93 | 225.16 | 191.76 | 180.79 | 177.96 | 186.89 | 206.64 | 236.58 |
| Fiji      | Male   | 0 | 0 | 0 | 0 | 0 | 0 | 4.36   | 10.65  | 14.87  | 22.35   | 32.17   | 39.38   | 40.35  | 37.6   | 36.39  | 40.75  | 45.47  | 52.85  | 63.7   | 79.31  |
| Fiji      | Female | 0 | 0 | 0 | 0 | 0 | 0 | 7.73   | 22.12  | 35.76  | 50.64   | 63.5    | 68.03   | 63.37  | 56.62  | 54.66  | 62.3   | 70.48  | 83.47  | 104.52 | 131.83 |
| Finland   | Male   | 0 | 0 | 0 | 0 | 0 | 0 | 17.03  | 43.94  | 65.81  | 101.39  | 149.64  | 176.99  | 160.51 | 119.89 | 84.49  | 68.42  | 61.92  | 62.87  | 72.32  | 90.4   |
| Finland   | Female | 0 | 0 | 0 | 0 | 0 | 0 | 51.19  | 167.23 | 328.76 | 531.83  | 671.1   | 626.85  | 441.1  | 268.74 | 171.61 | 127.98 | 108.53 | 105.16 | 113.17 | 128.34 |
| France    | Male   | 0 | 0 | 0 | 0 | 0 | 0 | 39.21  | 105.07 | 164.35 | 248.83  | 352.12  | 393.49  | 318.92 | 204.46 | 124.55 | 87.65  | 73.28  | 69.82  | 75.41  | 88.72  |
| France    | Female | 0 | 0 | 0 | 0 | 0 | 0 | 52.68  | 171.66 | 338.66 | 551.11  | 691.52  | 638.6   | 445.89 | 271.49 | 173.11 | 128.06 | 108.63 | 105.53 | 113.91 | 129.92 |
| Gabon     | Male   | 0 | 0 | 0 | 0 | 0 | 0 | 28.81  | 100.47 | 179.18 | 219.94  | 215.43  | 182.85  | 136.22 | 98.79  | 79.04  | 76.57  | 76.51  | 79.01  | 86.75  | 100.22 |
| Gabon     | Female | 0 | 0 | 0 | 0 | 0 | 0 | 37.57  | 140.34 | 267.59 | 343.87  | 351.39  | 311.02  | 238.73 | 176.47 | 138.2  | 122.79 | 119.35 | 126.6  | 141.38 | 162.55 |
| Gambia    | Male   | 0 | 0 | 0 | 0 | 0 | 0 | 28.81  | 100.47 | 179.18 | 219.94  | 215.43  | 182.85  | 136.22 | 98.79  | 79.04  | 76.57  | 76.51  | 79.01  | 86.75  | 100.22 |
| Gambia    | Female | 0 | 0 | 0 | 0 | 0 | 0 | 37.57  | 140.34 | 267.59 | 343.87  | 351.39  | 311.02  | 238.73 | 176.47 | 138.2  | 122.79 | 119.35 | 126.6  | 141.38 | 162.55 |
| Germany   | Male   | 0 | 0 | 0 | 0 | 0 | 0 | 19.18  | 49.74  | 74.93  | 114.37  | 167.86  | 197.41  | 177.59 | 131.94 | 92.41  | 73.86  | 65.48  | 64.86  | 72.96  | 89.08  |
| Germany   | Female | 0 | 0 | 0 | 0 | 0 | 0 | 41.57  | 131.89 | 254.31 | 406.24  | 518.11  | 506.1   | 379.26 | 246.34 | 164.74 | 126.07 | 108.22 | 105.91 | 115.88 | 133.55 |
| Ghana     | Male   | 0 | 0 | 0 | 0 | 0 | 0 | 28.81  | 100.47 | 179.18 | 219.94  | 215.43  | 182.85  | 136.22 | 98.79  | 79.04  | 76.57  | 76.51  | 79.01  | 86.75  | 100.22 |
| Ghana     | Female | 0 | 0 | 0 | 0 | 0 | 0 | 37.57  | 140.34 | 267.59 | 343.87  | 351.39  | 311.02  | 238.73 | 176.47 | 138.2  | 122.79 | 119.35 | 126.6  | 141.38 | 162.55 |
| Greece    | Male   | 0 | 0 | 0 | 0 | 0 | 0 | 13.45  | 34.01  | 50.63  | 79.71   | 117.65  | 140.88  | 132.34 | 101.77 | 73.84  | 62.67  | 58.35  | 59.65  | 69.54  | 86.85  |
| Greece    | Female | 0 | 0 | 0 | 0 | 0 | 0 | 25.04  | 77.39  | 143.02 | 226.06  | 296.21  | 305.41  | 251.34 | 183.85 | 135.22 | 112.26 | 101.86 | 103.94 | 117.61 | 138.86 |
| Greenland | Male   | 0 | 0 | 0 | 0 | 0 | 0 | 83.35  | 197.72 | 291.19 | 476.33  | 704.77  | 757.55  | 515.3  | 238.82 | 118.49 | 81.45  | 69.13  | 65.9   | 70.63  | 81.87  |
| Greenland | Female | 0 | 0 | 0 | 0 | 0 | 0 | 120.45 | 352.35 | 696.56 | 1216.94 | 1447.62 | 1055.06 | 491.98 | 190.46 | 97.47  | 75.62  | 74.51  | 84.34  | 98.26  | 115    |
| Grenada   | Male   | 0 | 0 | 0 | 0 | 0 | 0 | 9.64   | 30.84  | 54.33  | 75.84   | 89.95   | 89.88   | 76.32  | 61.7   | 54.81  | 59.52  | 65.62  | 73.19  | 84.05  | 100.02 |
| Grenada   | Female | 0 | 0 | 0 | 0 | 0 | 0 | 15.17  | 54.74  | 110.24 | 163.85  | 192.97  | 189.52  | 159.44 | 124.96 | 104.56 | 102.52 | 105.99 | 119.89 | 141.44 | 165.86 |
| Guam      | Male   | 0 | 0 | 0 | 0 | 0 | 0 | 4.36   | 10.65  | 14.87  | 22.35   | 32.17   | 39.38   | 40.35  | 37.6   | 36.39  | 40.75  | 45.47  | 52.85  | 63.7   | 79.31  |
| Guam      | Female | 0 | 0 | 0 | 0 | 0 | 0 | 7.73   | 22.12  | 35.76  | 50.64   | 63.5    | 68.03   | 63.37  | 56.62  | 54.66  | 62.3   | 70.48  | 83.47  | 104.52 | 131.83 |
| Guatemala | Male   | 0 | 0 | 0 | 0 | 0 | 0 | 10.8   | 37.46  | 73.64  | 108.58  | 126     | 119     | 96.28  | 74.93  | 63.16  | 63.51  | 65.71  | 71.53  | 83.61  | 102.71 |
| Guatemala | Female | 0 | 0 | 0 | 0 | 0 | 0 | 13.91  | 51.29  | 111.96 | 178.35  | 215.15  | 206.04  | 167.22 | 129.49 | 104.94 | 98.92  | 100.33 | 112.98 | 137.22 | 165.48 |
| Guinea    | Male   | 0 | 0 | 0 | 0 | 0 | 0 | 28.81  | 100.47 | 179.18 | 219.94  | 215.43  | 182.85  | 136.22 | 98.79  | 79.04  | 76.57  | 76.51  | 79.01  | 86.75  | 100.22 |



| Country                    | Gender | 2000 | 2001 | 2002 | 2003 | 2004 | 2005 | 2006   | 2007   | 2008   | 2009   | 2010    | 2011    | 2012   | 2013   | 2014   | 2015   | 2016   | 2017   | 2018   | 2019   | 2020 |
|----------------------------|--------|------|------|------|------|------|------|--------|--------|--------|--------|---------|---------|--------|--------|--------|--------|--------|--------|--------|--------|------|
| Guinea                     | Female | 0    | 0    | 0    | 0    | 0    | 0    | 37.57  | 140.34 | 267.59 | 343.87 | 351.39  | 311.02  | 238.73 | 176.47 | 138.2  | 122.79 | 119.35 | 126.6  | 141.38 | 162.55 |      |
| Guinea-Bissau              | Male   | 0    | 0    | 0    | 0    | 0    | 0    | 28.81  | 100.47 | 179.18 | 219.94 | 215.43  | 182.85  | 136.22 | 98.79  | 79.04  | 76.57  | 76.51  | 79.01  | 86.75  | 100.22 |      |
| Guinea-Bissau              | Female | 0    | 0    | 0    | 0    | 0    | 0    | 37.57  | 140.34 | 267.59 | 343.87 | 351.39  | 311.02  | 238.73 | 176.47 | 138.2  | 122.79 | 119.35 | 126.6  | 141.38 | 162.55 |      |
| Guyana                     | Male   | 0    | 0    | 0    | 0    | 0    | 0    | 9.64   | 30.84  | 54.33  | 75.84  | 89.95   | 89.88   | 76.32  | 61.7   | 54.81  | 59.52  | 65.62  | 73.19  | 84.05  | 100.02 |      |
| Guyana                     | Female | 0    | 0    | 0    | 0    | 0    | 0    | 15.17  | 54.74  | 110.24 | 163.85 | 192.97  | 189.52  | 159.44 | 124.96 | 104.56 | 102.52 | 105.99 | 119.89 | 141.44 | 165.86 |      |
| Haiti                      | Male   | 0    | 0    | 0    | 0    | 0    | 0    | 9.64   | 30.84  | 54.33  | 75.84  | 89.95   | 89.88   | 76.32  | 61.7   | 54.81  | 59.52  | 65.62  | 73.19  | 84.05  | 100.02 |      |
| Haiti                      | Female | 0    | 0    | 0    | 0    | 0    | 0    | 15.17  | 54.74  | 110.24 | 163.85 | 192.97  | 189.52  | 159.44 | 124.96 | 104.56 | 102.52 | 105.99 | 119.89 | 141.44 | 165.86 |      |
| Honduras                   | Male   | 0    | 0    | 0    | 0    | 0    | 0    | 10.8   | 37.46  | 73.64  | 108.58 | 126     | 119     | 96.28  | 74.93  | 63.16  | 63.51  | 65.71  | 71.53  | 83.61  | 102.71 |      |
| Honduras                   | Female | 0    | 0    | 0    | 0    | 0    | 0    | 13.91  | 51.29  | 111.96 | 178.35 | 215.15  | 206.04  | 167.22 | 129.49 | 104.94 | 98.92  | 100.33 | 112.98 | 137.22 | 165.48 |      |
| Hungary                    | Male   | 0    | 0    | 0    | 0    | 0    | 0    | 15.41  | 53.02  | 101.71 | 147.09 | 173.29  | 171.44  | 140.88 | 104.54 | 82.34  | 77.11  | 74.78  | 76.32  | 84.47  | 98.65  |      |
| Hungary                    | Female | 0    | 0    | 0    | 0    | 0    | 0    | 16.31  | 56.34  | 110.27 | 165.54 | 205.19  | 212.5   | 184.66 | 146.16 | 117.36 | 108.03 | 106.04 | 113.45 | 131.59 | 155.62 |      |
| Iceland                    | Male   | 0    | 0    | 0    | 0    | 0    | 0    | 115.57 | 285.15 | 394.68 | 689.79 | 1283.07 | 1323.37 | 742.22 | 316.13 | 146.96 | 88.86  | 67.22  | 60.43  | 64.2   | 75.57  |      |
| Iceland                    | Female | 0    | 0    | 0    | 0    | 0    | 0    | 112.82 | 381.6  | 674.8  | 1108.1 | 1521.19 | 1264.66 | 667.72 | 318.25 | 173.3  | 117.18 | 94.23  | 89.31  | 96.48  | 110.11 |      |
| India                      | Male   | 0    | 0    | 0    | 0    | 0    | 0    | 11.13  | 34.93  | 60.97  | 83.99  | 99.31   | 102.63  | 93.61  | 84.03  | 82.44  | 92.44  | 100.51 | 110.31 | 124.02 | 142.61 |      |
| India                      | Female | 0    | 0    | 0    | 0    | 0    | 0    | 16.59  | 59.73  | 119.43 | 172.22 | 200.57  | 205.07  | 186.79 | 165.59 | 156.9  | 162.77 | 169.99 | 184.31 | 205.92 | 235.88 |      |
| Indonesia                  | Male   | 0    | 0    | 0    | 0    | 0    | 0    | 2.63   | 5.71   | 7.03   | 8.91   | 11.51   | 12.89   | 13.23  | 14.45  | 16.92  | 23.6   | 30.73  | 40.03  | 52.48  | 69.89  |      |
| Indonesia                  | Female | 0    | 0    | 0    | 0    | 0    | 0    | 4.82   | 12.16  | 16.8   | 22.89  | 30.38   | 35.56   | 37.21  | 37.92  | 41.9   | 55.72  | 70.17  | 88.49  | 111.91 | 140.17 |      |
| Iran (Islamic Republic of) | Male   | 0    | 0    | 0    | 0    | 0    | 0    | 15.74  | 52.41  | 92.14  | 118.33 | 126.26  | 117.91  | 97.98  | 79.94  | 72.04  | 77.86  | 83.87  | 91.4   | 102.52 | 119.23 |      |
| Iran (Islamic Republic of) | Female | 0    | 0    | 0    | 0    | 0    | 0    | 28.82  | 119.31 | 269.51 | 400.23 | 435.22  | 380.16  | 286.47 | 210.87 | 166.18 | 148.52 | 144.69 | 155.67 | 176.78 | 203.30 |      |
| Irap                       | Male   | 0    | 0    | 0    | 0    | 0    | 0    | 13.23  | 39.99  | 67.53  | 89.71  | 97.52   | 90.43   | 74.27  | 58.1   | 47.85  | 48.18  | 51.44  | 57.42  | 66.95  | 80.68  |      |
| Irap                       | Female | 0    | 0    | 0    | 0    | 0    | 0    | 19.49  | 68.7   | 143.36 | 223.28 | 259.91  | 238.92  | 185.34 | 132.9  | 98.16  | 86.22  | 87.37  | 100.92 | 122.47 | 147.21 |      |
| Ireland                    | Male   | 0    | 0    | 0    | 0    | 0    | 0    | 48.22  | 130.26 | 204.24 | 307.1  | 435.53  | 476.09  | 370.14 | 226.87 | 131.55 | 89.41  | 72.78  | 68.3   | 73.15  | 86.4   |      |
| Ireland                    | Female | 0    | 0    | 0    | 0    | 0    | 0    | 52.68  | 171.66 | 338.66 | 551.11 | 691.52  | 638.6   | 445.89 | 271.49 | 173.11 | 128.06 | 108.63 | 105.53 | 113.91 | 129.92 |      |
| Israel                     | Male   | 0    | 0    | 0    | 0    | 0    | 0    | 71.91  | 199.14 | 318.61 | 482.35 | 681.33  | 705.82  | 492.45 | 268.31 | 144.22 | 92.96  | 72.98  | 66.82  | 71.54  | 84.9   |      |
| Israel                     | Female | 0    | 0    | 0    | 0    | 0    | 0    | 69.57  | 234.09 | 476.05 | 781.98 | 964.55  | 833.57  | 527.79 | 295.17 | 177.02 | 127.35 | 105.81 | 101.32 | 109.87 | 124.24 |      |
| Italy                      | Male   | 0    | 0    | 0    | 0    | 0    | 0    | 27.48  | 92.8   | 171.35 | 244.72 | 304.2   | 322.08  | 280.23 | 216.81 | 163.09 | 133.31 | 117.52 | 113.62 | 118.35 | 131.12 |      |
| Italy                      | Female | 0    | 0    | 0    | 0    | 0    | 0    | 37.27  | 146.32 | 320.77 | 494.58 | 579.2   | 544.32  | 427.93 | 314.49 | 235.25 | 191.88 | 168.32 | 162.55 | 171.09 | 188.34 |      |
| Jamaica                    | Male   | 0    | 0    | 0    | 0    | 0    | 0    | 9.64   | 30.84  | 54.33  | 75.84  | 89.95   | 89.88   | 76.32  | 61.7   | 54.81  | 59.52  | 65.62  | 73.19  | 84.05  | 100.02 |      |
| Jamaica                    | Female | 0    | 0    | 0    | 0    | 0    | 0    | 15.17  | 54.74  | 110.24 | 163.85 | 192.97  | 189.52  | 159.44 | 124.96 | 104.56 | 102.52 | 105.99 | 119.89 | 141.44 | 165.86 |      |
| Japan                      | Male   | 0    | 0    | 0    | 0    | 0    | 0    | 12.57  | 41.62  | 80.18  | 124.3  | 167.13  | 198.14  | 198.58 | 175.35 | 149.05 | 132.59 | 119.53 | 115.19 | 120.88 | 135.06 |      |

|                                  |        |   |   |   |   |   |   |       |        |        |        |        |        |        |        |        |        |        |        |        |        |
|----------------------------------|--------|---|---|---|---|---|---|-------|--------|--------|--------|--------|--------|--------|--------|--------|--------|--------|--------|--------|--------|
| Japan                            | Female | 0 | 0 | 0 | 0 | 0 | 0 | 52.48 | 248.2  | 623.62 | 951.41 | 1005.7 | 821.13 | 548.08 | 336.78 | 219.23 | 168.16 | 147.91 | 148.94 | 164.11 | 188.54 |
| Jordan                           | Male   | 0 | 0 | 0 | 0 | 0 | 0 | 13.23 | 39.99  | 67.53  | 89.71  | 97.52  | 90.43  | 74.27  | 58.1   | 47.85  | 48.18  | 51.44  | 57.42  | 66.95  | 80.68  |
| Jordan                           | Female | 0 | 0 | 0 | 0 | 0 | 0 | 19.49 | 68.7   | 143.36 | 223.28 | 259.91 | 238.92 | 185.34 | 132.9  | 98.16  | 86.22  | 87.37  | 100.92 | 122.47 | 147.21 |
| Kazakhstan                       | Male   | 0 | 0 | 0 | 0 | 0 | 0 | 22.44 | 79.13  | 150.54 | 206.35 | 231.16 | 224.19 | 188.63 | 144.76 | 108.49 | 90.96  | 81.68  | 79.72  | 86.4   | 100.81 |
| Kazakhstan                       | Female | 0 | 0 | 0 | 0 | 0 | 0 | 33.29 | 135.15 | 304.33 | 468.78 | 541.1  | 504.41 | 383.85 | 254.29 | 167.89 | 127.79 | 114.46 | 119.59 | 136.6  | 159.85 |
| Kenya                            | Male   | 0 | 0 | 0 | 0 | 0 | 0 | 26.21 | 97.44  | 184.04 | 230.17 | 226.79 | 200.14 | 160.41 | 128.29 | 112.49 | 112.8  | 114.94 | 119.9  | 129.05 | 143.74 |
| Kenya                            | Female | 0 | 0 | 0 | 0 | 0 | 0 | 33.11 | 132.58 | 270.09 | 358.41 | 369.18 | 334.56 | 275.93 | 225.16 | 191.76 | 180.79 | 177.96 | 186.89 | 206.64 | 236.58 |
| Kuwait                           | Male   | 0 | 0 | 0 | 0 | 0 | 0 | 13.23 | 39.99  | 67.53  | 89.71  | 97.52  | 90.43  | 74.27  | 58.1   | 47.85  | 48.18  | 51.44  | 57.42  | 66.95  | 80.68  |
| Kuwait                           | Female | 0 | 0 | 0 | 0 | 0 | 0 | 19.49 | 68.7   | 143.36 | 223.28 | 259.91 | 238.92 | 185.34 | 132.9  | 98.16  | 86.22  | 87.37  | 100.92 | 122.47 | 147.21 |
| Kyrgyzstan                       | Male   | 0 | 0 | 0 | 0 | 0 | 0 | 22.44 | 79.13  | 150.54 | 206.35 | 231.16 | 224.19 | 188.63 | 144.76 | 108.49 | 90.96  | 81.68  | 79.72  | 86.4   | 100.81 |
| Kyrgyzstan                       | Female | 0 | 0 | 0 | 0 | 0 | 0 | 33.29 | 135.15 | 304.33 | 468.78 | 541.1  | 504.41 | 383.85 | 254.29 | 167.89 | 127.79 | 114.46 | 119.59 | 136.6  | 159.85 |
| Lao People's Democratic Republic | Male   | 0 | 0 | 0 | 0 | 0 | 0 | 1.91  | 4.29   | 5.37   | 6.75   | 8.71   | 10.32  | 10.91  | 11.3   | 12.27  | 16.11  | 20.37  | 27.04  | 37.19  | 52.19  |
| Lao People's Democratic Republic | Female | 0 | 0 | 0 | 0 | 0 | 0 | 4.04  | 10.17  | 13.98  | 20     | 26.9   | 31.14  | 32.38  | 31.57  | 32.36  | 40.1   | 49.06  | 62.43  | 82.34  | 109.8  |
| Latvia                           | Male   | 0 | 0 | 0 | 0 | 0 | 0 | 31.46 | 105    | 190.52 | 254.31 | 275.2  | 252.28 | 197.24 | 140.34 | 99.62  | 82     | 75.4   | 77.3   | 85.72  | 99.94  |
| Latvia                           | Female | 0 | 0 | 0 | 0 | 0 | 0 | 44.02 | 164.39 | 334.35 | 480.97 | 546.03 | 509.01 | 387.03 | 258.05 | 169.54 | 128.51 | 114.26 | 118.43 | 135.14 | 156.66 |
| Lebanon                          | Male   | 0 | 0 | 0 | 0 | 0 | 0 | 13.23 | 39.99  | 67.53  | 89.71  | 97.52  | 90.43  | 74.27  | 58.1   | 47.85  | 48.18  | 51.44  | 57.42  | 66.95  | 80.68  |
| Lebanon                          | Female | 0 | 0 | 0 | 0 | 0 | 0 | 19.49 | 68.7   | 143.36 | 223.28 | 259.91 | 238.92 | 185.34 | 132.9  | 98.16  | 86.22  | 87.37  | 100.92 | 122.47 | 147.21 |
| Lesotho                          | Male   | 0 | 0 | 0 | 0 | 0 | 0 | 49.38 | 164.05 | 267    | 295.79 | 263.29 | 205.58 | 142.41 | 97.55  | 76.13  | 73.35  | 74.27  | 77.94  | 85.3   | 97.85  |
| Lesotho                          | Female | 0 | 0 | 0 | 0 | 0 | 0 | 55.57 | 195.99 | 335.88 | 383.13 | 355.75 | 299.25 | 226.68 | 167.8  | 131.69 | 118.01 | 114.99 | 123.73 | 139.65 | 161.55 |
| Liberia                          | Male   | 0 | 0 | 0 | 0 | 0 | 0 | 28.81 | 100.47 | 179.18 | 219.94 | 215.43 | 182.85 | 136.22 | 98.79  | 79.04  | 76.57  | 76.51  | 79.01  | 86.75  | 100.22 |
| Liberia                          | Female | 0 | 0 | 0 | 0 | 0 | 0 | 37.57 | 140.34 | 267.59 | 343.87 | 351.39 | 311.02 | 238.73 | 176.47 | 138.2  | 122.79 | 119.35 | 126.6  | 141.38 | 162.55 |
| Libya                            | Male   | 0 | 0 | 0 | 0 | 0 | 0 | 13.23 | 39.99  | 67.53  | 89.71  | 97.52  | 90.43  | 74.27  | 58.1   | 47.85  | 48.18  | 51.44  | 57.42  | 66.95  | 80.68  |
| Libya                            | Female | 0 | 0 | 0 | 0 | 0 | 0 | 19.49 | 68.7   | 143.36 | 223.28 | 259.91 | 238.92 | 185.34 | 132.9  | 98.16  | 86.22  | 87.37  | 100.92 | 122.47 | 147.21 |
| Lithuania                        | Male   | 0 | 0 | 0 | 0 | 0 | 0 | 16.81 | 52.78  | 89.83  | 121.07 | 139.3  | 138.49 | 118.88 | 93.46  | 74.34  | 67.53  | 65.76  | 70.24  | 80.43  | 95.42  |
| Lithuania                        | Female | 0 | 0 | 0 | 0 | 0 | 0 | 27.82 | 96.7   | 185.87 | 266.63 | 312.98 | 313.06 | 265.23 | 199.24 | 143.99 | 116.31 | 107.53 | 115.42 | 135.57 | 161.51 |
| Luxembourg                       | Male   | 0 | 0 | 0 | 0 | 0 | 0 | 48.22 | 130.26 | 204.24 | 307.1  | 435.53 | 476.09 | 370.14 | 226.87 | 131.55 | 89.41  | 72.78  | 68.3   | 73.15  | 86.4   |
| Luxembourg                       | Female | 0 | 0 | 0 | 0 | 0 | 0 | 52.68 | 171.66 | 338.66 | 551.11 | 691.52 | 638.6  | 445.89 | 271.49 | 173.11 | 128.06 | 108.63 | 105.53 | 113.91 | 129.92 |
| Madagascar                       | Male   | 0 | 0 | 0 | 0 | 0 | 0 | 28.81 | 100.47 | 179.18 | 219.94 | 215.43 | 182.85 | 136.22 | 98.79  | 79.04  | 76.57  | 76.51  | 79.01  | 86.75  | 100.22 |
| Madagascar                       | Female | 0 | 0 | 0 | 0 | 0 | 0 | 37.57 | 140.34 | 267.59 | 343.87 | 351.39 | 311.02 | 238.73 | 176.47 | 138.2  | 122.79 | 119.35 | 126.6  | 141.38 | 162.55 |
| Malawi                           | Male   | 0 | 0 | 0 | 0 | 0 | 0 | 28.81 | 100.47 | 179.18 | 219.94 | 215.43 | 182.85 | 136.22 | 98.79  | 79.04  | 76.57  | 76.51  | 79.01  | 86.75  | 100.22 |

|                                  |        |   |   |   |   |   |   |       |        |        |        |        |        |        |        |        |        |        |        |        |        |
|----------------------------------|--------|---|---|---|---|---|---|-------|--------|--------|--------|--------|--------|--------|--------|--------|--------|--------|--------|--------|--------|
| Malawi                           | Female | 0 | 0 | 0 | 0 | 0 | 0 | 37.57 | 140.34 | 267.59 | 343.87 | 351.39 | 311.02 | 238.73 | 176.47 | 138.2  | 122.79 | 119.35 | 126.6  | 141.38 | 162.55 |
| Malaysia                         | Male   | 0 | 0 | 0 | 0 | 0 | 0 | 1.91  | 4.29   | 5.37   | 6.75   | 8.71   | 10.32  | 10.91  | 11.3   | 12.27  | 16.11  | 20.37  | 27.04  | 37.19  | 52.19  |
| Malaysia                         | Female | 0 | 0 | 0 | 0 | 0 | 0 | 4.04  | 10.17  | 13.98  | 20     | 26.9   | 31.14  | 32.38  | 31.57  | 32.36  | 40.1   | 49.06  | 62.43  | 82.34  | 109.8  |
| Maldives                         | Male   | 0 | 0 | 0 | 0 | 0 | 0 | 1.91  | 4.29   | 5.37   | 6.75   | 8.71   | 10.32  | 10.91  | 11.3   | 12.27  | 16.11  | 20.37  | 27.04  | 37.19  | 52.19  |
| Maldives                         | Female | 0 | 0 | 0 | 0 | 0 | 0 | 4.04  | 10.17  | 13.98  | 20     | 26.9   | 31.14  | 32.38  | 31.57  | 32.36  | 40.1   | 49.06  | 62.43  | 82.34  | 109.8  |
| Mali                             | Male   | 0 | 0 | 0 | 0 | 0 | 0 | 28.81 | 100.47 | 179.18 | 219.94 | 215.43 | 182.85 | 136.22 | 98.79  | 79.04  | 76.57  | 76.51  | 79.01  | 86.75  | 100.22 |
| Mali                             | Female | 0 | 0 | 0 | 0 | 0 | 0 | 37.57 | 140.34 | 267.59 | 343.87 | 351.39 | 311.02 | 238.73 | 176.47 | 138.2  | 122.79 | 119.35 | 126.6  | 141.38 | 162.55 |
| Malta                            | Male   | 0 | 0 | 0 | 0 | 0 | 0 | 48.22 | 130.26 | 204.24 | 307.1  | 435.53 | 476.09 | 370.14 | 226.87 | 131.55 | 89.41  | 72.78  | 68.3   | 73.15  | 86.4   |
| Malta                            | Female | 0 | 0 | 0 | 0 | 0 | 0 | 52.68 | 171.66 | 338.66 | 551.11 | 691.52 | 638.6  | 445.89 | 271.49 | 173.11 | 128.06 | 108.63 | 105.53 | 113.91 | 129.92 |
| Marshall Islands                 | Male   | 0 | 0 | 0 | 0 | 0 | 0 | 4.36  | 10.65  | 14.87  | 22.35  | 32.17  | 39.38  | 40.35  | 37.6   | 36.39  | 40.75  | 45.47  | 52.85  | 63.7   | 79.31  |
| Marshall Islands                 | Female | 0 | 0 | 0 | 0 | 0 | 0 | 7.73  | 22.12  | 35.76  | 50.64  | 63.5   | 68.03  | 63.37  | 56.62  | 54.66  | 62.3   | 70.48  | 83.47  | 104.52 | 131.83 |
| Mauritania                       | Male   | 0 | 0 | 0 | 0 | 0 | 0 | 28.81 | 100.47 | 179.18 | 219.94 | 215.43 | 182.85 | 136.22 | 98.79  | 79.04  | 76.57  | 76.51  | 79.01  | 86.75  | 100.22 |
| Mauritania                       | Female | 0 | 0 | 0 | 0 | 0 | 0 | 37.57 | 140.34 | 267.59 | 343.87 | 351.39 | 311.02 | 238.73 | 176.47 | 138.2  | 122.79 | 119.35 | 126.6  | 141.38 | 162.55 |
| Mauritius                        | Male   | 0 | 0 | 0 | 0 | 0 | 0 | 1.91  | 4.29   | 5.37   | 6.75   | 8.71   | 10.32  | 10.91  | 11.3   | 12.27  | 16.11  | 20.37  | 27.04  | 37.19  | 52.19  |
| Mauritius                        | Female | 0 | 0 | 0 | 0 | 0 | 0 | 4.04  | 10.17  | 13.98  | 20     | 26.9   | 31.14  | 32.38  | 31.57  | 32.36  | 40.1   | 49.06  | 62.43  | 82.34  | 109.8  |
| Mexico                           | Male   | 0 | 0 | 0 | 0 | 0 | 0 | 28.58 | 128.09 | 317.72 | 487.27 | 490.31 | 366.17 | 234.81 | 156.14 | 120.97 | 111.71 | 109.57 | 113.81 | 125.01 | 143.07 |
| Mexico                           | Female | 0 | 0 | 0 | 0 | 0 | 0 | 28.8  | 134.87 | 360.94 | 599.05 | 650.02 | 516.73 | 346.54 | 237.39 | 184.98 | 168.14 | 164.08 | 173.25 | 195.67 | 226.35 |
| Micronesia (Federated States of) | Male   | 0 | 0 | 0 | 0 | 0 | 0 | 4.36  | 10.65  | 14.87  | 22.35  | 32.17  | 39.38  | 40.35  | 37.6   | 36.39  | 40.75  | 45.47  | 52.85  | 63.7   | 79.31  |
| Micronesia (Federated States of) | Female | 0 | 0 | 0 | 0 | 0 | 0 | 7.73  | 22.12  | 35.76  | 50.64  | 63.5   | 68.03  | 63.37  | 56.62  | 54.66  | 62.3   | 70.48  | 83.47  | 104.52 | 131.83 |
| Mongolia                         | Male   | 0 | 0 | 0 | 0 | 0 | 0 | 22.44 | 79.13  | 150.54 | 206.35 | 231.16 | 224.19 | 188.63 | 144.76 | 108.49 | 90.96  | 81.68  | 79.72  | 86.4   | 100.81 |
| Mongolia                         | Female | 0 | 0 | 0 | 0 | 0 | 0 | 33.29 | 135.15 | 304.33 | 468.78 | 541.1  | 504.41 | 383.85 | 254.29 | 167.89 | 127.79 | 114.46 | 119.59 | 136.6  | 159.85 |
| Montenegro                       | Male   | 0 | 0 | 0 | 0 | 0 | 0 | 15.41 | 53.02  | 101.71 | 147.09 | 173.29 | 171.44 | 140.88 | 104.54 | 82.34  | 77.11  | 74.78  | 76.32  | 84.47  | 98.65  |
| Montenegro                       | Female | 0 | 0 | 0 | 0 | 0 | 0 | 16.31 | 56.34  | 110.27 | 165.54 | 205.19 | 212.5  | 184.66 | 146.16 | 117.36 | 108.03 | 106.04 | 113.45 | 131.59 | 155.62 |
| Morocco                          | Male   | 0 | 0 | 0 | 0 | 0 | 0 | 13.23 | 39.99  | 67.53  | 89.71  | 97.52  | 90.43  | 74.27  | 58.1   | 47.85  | 48.18  | 51.44  | 57.42  | 66.95  | 80.68  |
| Morocco                          | Female | 0 | 0 | 0 | 0 | 0 | 0 | 19.49 | 68.7   | 143.36 | 223.28 | 259.91 | 238.92 | 185.34 | 132.9  | 98.16  | 86.22  | 87.37  | 100.92 | 122.47 | 147.21 |
| Mozambique                       | Male   | 0 | 0 | 0 | 0 | 0 | 0 | 28.81 | 100.47 | 179.18 | 219.94 | 215.43 | 182.85 | 136.22 | 98.79  | 79.04  | 76.57  | 76.51  | 79.01  | 86.75  | 100.22 |
| Mozambique                       | Female | 0 | 0 | 0 | 0 | 0 | 0 | 37.57 | 140.34 | 267.59 | 343.87 | 351.39 | 311.02 | 238.73 | 176.47 | 138.2  | 122.79 | 119.35 | 126.6  | 141.38 | 162.55 |
| Myanmar                          | Male   | 0 | 0 | 0 | 0 | 0 | 0 | 1.91  | 4.29   | 5.37   | 6.75   | 8.71   | 10.32  | 10.91  | 11.3   | 12.27  | 16.11  | 20.37  | 27.04  | 37.19  | 52.19  |
| Myanmar                          | Female | 0 | 0 | 0 | 0 | 0 | 0 | 4.04  | 10.17  | 13.98  | 20     | 26.9   | 31.14  | 32.38  | 31.57  | 32.36  | 40.1   | 49.06  | 62.43  | 82.34  | 109.8  |
| Namibia                          | Male   | 0 | 0 | 0 | 0 | 0 | 0 | 49.38 | 164.05 | 267    | 295.79 | 263.29 | 205.58 | 142.41 | 97.55  | 76.13  | 73.35  | 74.27  | 77.94  | 85.3   | 97.85  |

| Country                  | Gender | 2010 | 2011 | 2012 | 2013 | 2014 | 2015 | 2016  | 2017   | 2018   | 2019    | 2020    | 2021   | 2022   | 2023   | 2024   | 2025   | 2026   | 2027   | 2028   | 2029   | 2030 |
|--------------------------|--------|------|------|------|------|------|------|-------|--------|--------|---------|---------|--------|--------|--------|--------|--------|--------|--------|--------|--------|------|
| Namibia                  | Female | 0    | 0    | 0    | 0    | 0    | 0    | 55.57 | 195.99 | 335.88 | 383.13  | 355.75  | 299.25 | 226.68 | 167.8  | 131.69 | 118.01 | 114.99 | 123.73 | 139.65 | 161.55 |      |
| Nepal                    | Male   | 0    | 0    | 0    | 0    | 0    | 0    | 10.3  | 32.23  | 56.19  | 78.75   | 94.37   | 96.7   | 84.7   | 69.74  | 62.26  | 66.26  | 70.58  | 75.56  | 84.16  | 99.57  |      |
| Nepal                    | Female | 0    | 0    | 0    | 0    | 0    | 0    | 16.31 | 57.17  | 111.43 | 161.42  | 191.83  | 195.03 | 170.6  | 138.37 | 116.81 | 114.17 | 116.75 | 126.39 | 142.86 | 165.84 |      |
| Netherlands              | Male   | 0    | 0    | 0    | 0    | 0    | 0    | 36.02 | 95.73  | 145.28 | 213.17  | 295.24  | 326.79 | 270.26 | 180.01 | 113.65 | 83.97  | 72.02  | 69.6   | 74.95  | 88.42  |      |
| Netherlands              | Female | 0    | 0    | 0    | 0    | 0    | 0    | 38.96 | 123.32 | 234.18 | 369.41  | 468.25  | 454.21 | 341.72 | 227.98 | 157.36 | 124.13 | 109.02 | 108.72 | 119.82 | 138.05 |      |
| New Zealand              | Male   | 0    | 0    | 0    | 0    | 0    | 0    | 24.78 | 90.63  | 182.4  | 266.44  | 319.45  | 326.56 | 283.86 | 224.17 | 173.61 | 145.92 | 129.43 | 123.98 | 127.57 | 139.94 |      |
| New Zealand              | Female | 0    | 0    | 0    | 0    | 0    | 0    | 55    | 263.59 | 681.97 | 1068.45 | 1146.46 | 917.82 | 583.63 | 349.34 | 227.7  | 177.85 | 159.21 | 155.95 | 165.22 | 186.35 |      |
| Nicaragua                | Male   | 0    | 0    | 0    | 0    | 0    | 0    | 10.8  | 37.46  | 73.64  | 108.58  | 126     | 119    | 96.28  | 74.93  | 63.16  | 63.51  | 65.71  | 71.53  | 83.61  | 102.71 |      |
| Nicaragua                | Female | 0    | 0    | 0    | 0    | 0    | 0    | 13.91 | 51.29  | 111.96 | 178.35  | 215.15  | 206.04 | 167.22 | 129.49 | 104.94 | 98.92  | 100.33 | 112.98 | 137.22 | 165.48 |      |
| Niger                    | Male   | 0    | 0    | 0    | 0    | 0    | 0    | 28.81 | 100.47 | 179.18 | 219.94  | 215.43  | 182.85 | 136.22 | 98.79  | 79.04  | 76.57  | 76.51  | 79.01  | 86.75  | 100.22 |      |
| Niger                    | Female | 0    | 0    | 0    | 0    | 0    | 0    | 37.57 | 140.34 | 267.59 | 343.87  | 351.39  | 311.02 | 238.73 | 176.47 | 138.2  | 122.79 | 119.35 | 126.6  | 141.38 | 162.55 |      |
| Nigeria                  | Male   | 0    | 0    | 0    | 0    | 0    | 0    | 26.21 | 97.44  | 184.04 | 230.17  | 226.79  | 200.14 | 160.41 | 128.29 | 112.49 | 112.8  | 114.94 | 119.9  | 129.05 | 143.74 |      |
| Nigeria                  | Female | 0    | 0    | 0    | 0    | 0    | 0    | 33.11 | 132.58 | 270.09 | 358.41  | 369.18  | 334.56 | 275.93 | 225.16 | 191.76 | 180.79 | 177.96 | 186.89 | 206.64 | 236.58 |      |
| North Macedonia          | Male   | 0    | 0    | 0    | 0    | 0    | 0    | 15.41 | 53.02  | 101.71 | 147.09  | 173.29  | 171.44 | 140.88 | 104.54 | 82.34  | 77.11  | 74.78  | 76.32  | 84.47  | 98.65  |      |
| North Macedonia          | Female | 0    | 0    | 0    | 0    | 0    | 0    | 16.31 | 56.34  | 110.27 | 165.54  | 205.19  | 212.5  | 184.66 | 146.16 | 117.36 | 108.03 | 106.04 | 113.45 | 131.59 | 155.62 |      |
| Northern Mariana Islands | Male   | 0    | 0    | 0    | 0    | 0    | 0    | 4.36  | 10.65  | 14.87  | 22.35   | 32.17   | 39.38  | 40.35  | 37.6   | 36.39  | 40.75  | 45.47  | 52.85  | 63.7   | 79.31  |      |
| Northern Mariana Islands | Female | 0    | 0    | 0    | 0    | 0    | 0    | 7.73  | 22.12  | 35.76  | 50.64   | 63.5    | 68.03  | 63.37  | 56.62  | 54.66  | 62.3   | 70.48  | 83.47  | 104.52 | 131.83 |      |
| Norway                   | Male   | 0    | 0    | 0    | 0    | 0    | 0    | 40.54 | 142.56 | 274.72 | 397.95  | 488.15  | 502.46 | 410.03 | 286.8  | 195.85 | 146    | 121.17 | 112.31 | 114.99 | 126.2  |      |
| Norway                   | Female | 0    | 0    | 0    | 0    | 0    | 0    | 62.41 | 267.81 | 634.43 | 972.69  | 1075.11 | 912.91 | 623.84 | 395.15 | 263.51 | 199.41 | 165.72 | 154.12 | 158.49 | 172.84 |      |
| Oman                     | Male   | 0    | 0    | 0    | 0    | 0    | 0    | 13.23 | 39.99  | 67.53  | 89.71   | 97.52   | 90.43  | 74.27  | 58.1   | 47.85  | 48.18  | 51.44  | 57.42  | 66.95  | 80.68  |      |
| Oman                     | Female | 0    | 0    | 0    | 0    | 0    | 0    | 19.49 | 68.7   | 143.36 | 223.28  | 259.91  | 238.92 | 185.34 | 132.9  | 98.16  | 86.22  | 87.37  | 100.92 | 122.47 | 147.21 |      |
| Pakistan                 | Male   | 0    | 0    | 0    | 0    | 0    | 0    | 11.13 | 34.93  | 60.97  | 83.99   | 99.31   | 102.63 | 93.61  | 84.03  | 82.44  | 92.44  | 100.51 | 110.31 | 124.02 | 142.61 |      |
| Pakistan                 | Female | 0    | 0    | 0    | 0    | 0    | 0    | 16.59 | 59.73  | 119.43 | 172.22  | 200.57  | 205.07 | 186.79 | 165.59 | 156.9  | 162.77 | 169.99 | 184.31 | 205.92 | 235.88 |      |
| Palestine                | Male   | 0    | 0    | 0    | 0    | 0    | 0    | 13.23 | 39.99  | 67.53  | 89.71   | 97.52   | 90.43  | 74.27  | 58.1   | 47.85  | 48.18  | 51.44  | 57.42  | 66.95  | 80.68  |      |
| Palestine                | Female | 0    | 0    | 0    | 0    | 0    | 0    | 19.49 | 68.7   | 143.36 | 223.28  | 259.91  | 238.92 | 185.34 | 132.9  | 98.16  | 86.22  | 87.37  | 100.92 | 122.47 | 147.21 |      |
| Panama                   | Male   | 0    | 0    | 0    | 0    | 0    | 0    | 10.8  | 37.46  | 73.64  | 108.58  | 126     | 119    | 96.28  | 74.93  | 63.16  | 63.51  | 65.71  | 71.53  | 83.61  | 102.71 |      |
| Panama                   | Female | 0    | 0    | 0    | 0    | 0    | 0    | 13.91 | 51.29  | 111.96 | 178.35  | 215.15  | 206.04 | 167.22 | 129.49 | 104.94 | 98.92  | 100.33 | 112.98 | 137.22 | 165.48 |      |
| Papua New Guinea         | Male   | 0    | 0    | 0    | 0    | 0    | 0    | 4.36  | 10.65  | 14.87  | 22.35   | 32.17   | 39.38  | 40.35  | 37.6   | 36.39  | 40.75  | 45.47  | 52.85  | 63.7   | 79.31  |      |
| Papua New Guinea         | Female | 0    | 0    | 0    | 0    | 0    | 0    | 7.73  | 22.12  | 35.76  | 50.64   | 63.5    | 68.03  | 63.37  | 56.62  | 54.66  | 62.3   | 70.48  | 83.47  | 104.52 | 131.83 |      |
| Paraguay                 | Male   | 0    | 0    | 0    | 0    | 0    | 0    | 9.64  | 30.84  | 54.33  | 75.84   | 89.95   | 89.88  | 76.32  | 61.7   | 54.81  | 59.52  | 65.62  | 73.19  | 84.05  | 100.02 |      |

| Country                          | Sex    | 2000 | 2001 | 2002 | 2003 | 2004 | 2005 | 2006 | 2007  | 2008   | 2009   | 2010    | 2011    | 2012    | 2013   | 2014   | 2015   | 2016   | 2017   | 2018   | 2019   | 2020   |
|----------------------------------|--------|------|------|------|------|------|------|------|-------|--------|--------|---------|---------|---------|--------|--------|--------|--------|--------|--------|--------|--------|
| Paraguay                         | Female | 0    | 0    | 0    | 0    | 0    | 0    | 0    | 15.17 | 54.74  | 110.24 | 163.85  | 192.97  | 189.52  | 159.44 | 124.96 | 104.56 | 102.52 | 105.99 | 119.89 | 141.44 | 165.86 |
| Peru                             | Male   | 0    | 0    | 0    | 0    | 0    | 0    | 0    | 9.25  | 30.22  | 55.73  | 81.73   | 97.25   | 94.82   | 79.99  | 65.36  | 56.88  | 57.74  | 61.15  | 68.5   | 81.85  | 102.35 |
| Peru                             | Female | 0    | 0    | 0    | 0    | 0    | 0    | 0    | 15.39 | 55.57  | 117.4  | 183.53  | 220.15  | 213.15  | 175.68 | 136.07 | 108.78 | 100.51 | 101.37 | 113.28 | 135.05 | 164.01 |
| Philippines                      | Male   | 0    | 0    | 0    | 0    | 0    | 0    | 0    | 2.63  | 5.71   | 7.03   | 8.91    | 11.51   | 12.89   | 13.23  | 14.45  | 16.92  | 23.6   | 30.73  | 40.03  | 52.48  | 69.89  |
| Philippines                      | Female | 0    | 0    | 0    | 0    | 0    | 0    | 0    | 4.82  | 12.16  | 16.8   | 22.89   | 30.38   | 35.56   | 37.21  | 37.92  | 41.9   | 55.72  | 70.17  | 88.49  | 111.91 | 140.17 |
| Poland                           | Male   | 0    | 0    | 0    | 0    | 0    | 0    | 0    | 15.81 | 55.74  | 109.54 | 156.11  | 178.19  | 176.44  | 153.94 | 128.02 | 113.4  | 113.08 | 113.5  | 117.37 | 125.84 | 141.79 |
| Poland                           | Female | 0    | 0    | 0    | 0    | 0    | 0    | 0    | 16.38 | 59.49  | 120.63 | 176.4   | 210.68  | 218.96  | 201    | 175.97 | 158.08 | 157.31 | 159.41 | 168.49 | 187.9  | 214.76 |
| Portugal                         | Male   | 0    | 0    | 0    | 0    | 0    | 0    | 0    | 32.73 | 86.64  | 132.6  | 199.57  | 286.34  | 327.12  | 274.67 | 184.38 | 117.26 | 85.59  | 72.09  | 68.21  | 73.68  | 86.89  |
| Portugal                         | Female | 0    | 0    | 0    | 0    | 0    | 0    | 0    | 68.09 | 228.94 | 464.35 | 758.21  | 931.14  | 810.78  | 520.86 | 292.66 | 175.66 | 126.65 | 105.26 | 100.85 | 109.54 | 126.13 |
| Puerto Rico                      | Male   | 0    | 0    | 0    | 0    | 0    | 0    | 0    | 9.64  | 30.84  | 54.33  | 75.84   | 89.95   | 89.88   | 76.32  | 61.7   | 54.81  | 59.52  | 65.62  | 73.19  | 84.05  | 100.02 |
| Puerto Rico                      | Female | 0    | 0    | 0    | 0    | 0    | 0    | 0    | 15.17 | 54.74  | 110.24 | 163.85  | 192.97  | 189.52  | 159.44 | 124.96 | 104.56 | 102.52 | 105.99 | 119.89 | 141.44 | 165.86 |
| Qatar                            | Male   | 0    | 0    | 0    | 0    | 0    | 0    | 0    | 13.23 | 39.99  | 67.53  | 89.71   | 97.52   | 90.43   | 74.27  | 58.1   | 47.85  | 48.18  | 51.44  | 57.42  | 66.95  | 80.68  |
| Qatar                            | Female | 0    | 0    | 0    | 0    | 0    | 0    | 0    | 19.49 | 68.7   | 143.36 | 223.28  | 259.91  | 238.92  | 185.34 | 132.9  | 98.16  | 86.22  | 87.37  | 100.92 | 122.47 | 147.21 |
| Republic of Korea                | Male   | 0    | 0    | 0    | 0    | 0    | 0    | 0    | 15.59 | 48.7   | 90.12  | 145.81  | 209.38  | 251.16  | 237.99 | 183.95 | 127.61 | 94.58  | 78.2   | 73.15  | 78.02  | 90.38  |
| Republic of Korea                | Female | 0    | 0    | 0    | 0    | 0    | 0    | 0    | 93.1  | 409.36 | 997.06 | 1542.7  | 1575.62 | 1100.14 | 563.16 | 258.82 | 132.98 | 90.13  | 79.43  | 85.59  | 99.97  | 118.05 |
| Republic of Moldova              | Male   | 0    | 0    | 0    | 0    | 0    | 0    | 0    | 31.46 | 105    | 190.52 | 254.31  | 275.2   | 252.28  | 197.24 | 140.34 | 99.62  | 82     | 75.4   | 77.3   | 85.72  | 99.94  |
| Republic of Moldova              | Female | 0    | 0    | 0    | 0    | 0    | 0    | 0    | 44.02 | 164.39 | 334.35 | 480.97  | 546.03  | 509.01  | 387.03 | 258.05 | 169.54 | 128.51 | 114.26 | 118.43 | 135.14 | 156.66 |
| Romania                          | Male   | 0    | 0    | 0    | 0    | 0    | 0    | 0    | 15.41 | 53.02  | 101.71 | 147.09  | 173.29  | 171.44  | 140.88 | 104.54 | 82.34  | 77.11  | 74.78  | 76.32  | 84.47  | 98.65  |
| Romania                          | Female | 0    | 0    | 0    | 0    | 0    | 0    | 0    | 16.31 | 56.34  | 110.27 | 165.54  | 205.19  | 212.5   | 184.66 | 146.16 | 117.36 | 108.03 | 106.04 | 113.45 | 131.59 | 155.62 |
| Russian Federation               | Male   | 0    | 0    | 0    | 0    | 0    | 0    | 0    | 68.06 | 317.61 | 717.11 | 932.85  | 835.05  | 602.01  | 383.29 | 243.61 | 168.74 | 132.22 | 115.5  | 111.61 | 116.25 | 128.38 |
| Russian Federation               | Female | 0    | 0    | 0    | 0    | 0    | 0    | 0    | 73.26 | 361.38 | 903.42 | 1307.87 | 1283.71 | 977.22  | 625.51 | 384.12 | 253.31 | 191.71 | 163.55 | 156.28 | 165.4  | 184.94 |
| Rwanda                           | Male   | 0    | 0    | 0    | 0    | 0    | 0    | 0    | 28.81 | 100.47 | 179.18 | 219.94  | 215.43  | 182.85  | 136.22 | 98.79  | 79.04  | 76.57  | 76.51  | 79.01  | 86.75  | 100.22 |
| Rwanda                           | Female | 0    | 0    | 0    | 0    | 0    | 0    | 0    | 37.57 | 140.34 | 267.59 | 343.87  | 351.39  | 311.02  | 238.73 | 176.47 | 138.2  | 122.79 | 119.35 | 126.6  | 141.38 | 162.55 |
| Saint Lucia                      | Male   | 0    | 0    | 0    | 0    | 0    | 0    | 0    | 9.64  | 30.84  | 54.33  | 75.84   | 89.95   | 89.88   | 76.32  | 61.7   | 54.81  | 59.52  | 65.62  | 73.19  | 84.05  | 100.02 |
| Saint Lucia                      | Female | 0    | 0    | 0    | 0    | 0    | 0    | 0    | 15.17 | 54.74  | 110.24 | 163.85  | 192.97  | 189.52  | 159.44 | 124.96 | 104.56 | 102.52 | 105.99 | 119.89 | 141.44 | 165.86 |
| Saint Vincent and the Grenadines | Male   | 0    | 0    | 0    | 0    | 0    | 0    | 0    | 9.64  | 30.84  | 54.33  | 75.84   | 89.95   | 89.88   | 76.32  | 61.7   | 54.81  | 59.52  | 65.62  | 73.19  | 84.05  | 100.02 |
| Saint Vincent and the Grenadines | Female | 0    | 0    | 0    | 0    | 0    | 0    | 0    | 15.17 | 54.74  | 110.24 | 163.85  | 192.97  | 189.52  | 159.44 | 124.96 | 104.56 | 102.52 | 105.99 | 119.89 | 141.44 | 165.86 |
| Samoa                            | Male   | 0    | 0    | 0    | 0    | 0    | 0    | 0    | 4.36  | 10.65  | 14.87  | 22.35   | 32.17   | 39.38   | 40.35  | 37.6   | 36.39  | 40.75  | 45.47  | 52.85  | 63.7   | 79.31  |
| Samoa                            | Female | 0    | 0    | 0    | 0    | 0    | 0    | 0    | 7.73  | 22.12  | 35.76  | 50.64   | 63.5    | 68.03   | 63.37  | 56.62  | 54.66  | 62.3   | 70.48  | 83.47  | 104.52 | 131.83 |
| Sao Tome and Principe            | Male   | 0    | 0    | 0    | 0    | 0    | 0    | 0    | 28.81 | 100.47 | 179.18 | 219.94  | 215.43  | 182.85  | 136.22 | 98.79  | 79.04  | 76.57  | 76.51  | 79.01  | 86.75  | 100.22 |

|                       |        |   |   |   |   |   |   |       |        |        |         |         |         |        |        |        |        |        |        |        |        |
|-----------------------|--------|---|---|---|---|---|---|-------|--------|--------|---------|---------|---------|--------|--------|--------|--------|--------|--------|--------|--------|
| Sao Tome and Principe | Female | 0 | 0 | 0 | 0 | 0 | 0 | 37.57 | 140.34 | 267.59 | 343.87  | 351.39  | 311.02  | 238.73 | 176.47 | 138.2  | 122.79 | 119.35 | 126.6  | 141.38 | 162.55 |
| Saudi Arabia          | Male   | 0 | 0 | 0 | 0 | 0 | 0 | 39.47 | 142.83 | 280.38 | 356.91  | 318.18  | 227.59  | 142.82 | 90.11  | 65.91  | 60.45  | 60.03  | 63.2   | 70.32  | 81.07  |
| Saudi Arabia          | Female | 0 | 0 | 0 | 0 | 0 | 0 | 40.22 | 154.42 | 357.09 | 566.59  | 607.03  | 467.09  | 290.75 | 175.5  | 116.34 | 93.79  | 90.63  | 101.5  | 119.86 | 140.53 |
| Senegal               | Male   | 0 | 0 | 0 | 0 | 0 | 0 | 28.81 | 100.47 | 179.18 | 219.94  | 215.43  | 182.85  | 136.22 | 98.79  | 79.04  | 76.57  | 76.51  | 79.01  | 86.75  | 100.22 |
| Senegal               | Female | 0 | 0 | 0 | 0 | 0 | 0 | 37.57 | 140.34 | 267.59 | 343.87  | 351.39  | 311.02  | 238.73 | 176.47 | 138.2  | 122.79 | 119.35 | 126.6  | 141.38 | 162.55 |
| Serbia                | Male   | 0 | 0 | 0 | 0 | 0 | 0 | 15.41 | 53.02  | 101.71 | 147.09  | 173.29  | 171.44  | 140.88 | 104.54 | 82.34  | 77.11  | 74.78  | 76.32  | 84.47  | 98.65  |
| Serbia                | Female | 0 | 0 | 0 | 0 | 0 | 0 | 16.31 | 56.34  | 110.27 | 165.54  | 205.19  | 212.5   | 184.66 | 146.16 | 117.36 | 108.03 | 106.04 | 113.45 | 131.59 | 155.62 |
| Seychelles            | Male   | 0 | 0 | 0 | 0 | 0 | 0 | 1.91  | 4.29   | 5.37   | 6.75    | 8.71    | 10.32   | 10.91  | 11.3   | 12.27  | 16.11  | 20.37  | 27.04  | 37.19  | 52.19  |
| Seychelles            | Female | 0 | 0 | 0 | 0 | 0 | 0 | 4.04  | 10.17  | 13.98  | 20      | 26.9    | 31.14   | 32.38  | 31.57  | 32.36  | 40.1   | 49.06  | 62.43  | 82.34  | 109.8  |
| Sierra Leone          | Male   | 0 | 0 | 0 | 0 | 0 | 0 | 28.81 | 100.47 | 179.18 | 219.94  | 215.43  | 182.85  | 136.22 | 98.79  | 79.04  | 76.57  | 76.51  | 79.01  | 86.75  | 100.22 |
| Sierra Leone          | Female | 0 | 0 | 0 | 0 | 0 | 0 | 37.57 | 140.34 | 267.59 | 343.87  | 351.39  | 311.02  | 238.73 | 176.47 | 138.2  | 122.79 | 119.35 | 126.6  | 141.38 | 162.55 |
| Singapore             | Male   | 0 | 0 | 0 | 0 | 0 | 0 | 14.15 | 42.89  | 77.43  | 124.64  | 180.63  | 220.76  | 213.1  | 168.41 | 121.21 | 92.91  | 77.85  | 73.03  | 78.46  | 91.37  |
| Singapore             | Female | 0 | 0 | 0 | 0 | 0 | 0 | 75.36 | 326.83 | 782.08 | 1209.69 | 1286.55 | 971.01  | 541.29 | 262.75 | 138.85 | 95.89  | 84.63  | 90.81  | 105.78 | 123.81 |
| Slovakia              | Male   | 0 | 0 | 0 | 0 | 0 | 0 | 15.41 | 53.02  | 101.71 | 147.09  | 173.29  | 171.44  | 140.88 | 104.54 | 82.34  | 77.11  | 74.78  | 76.32  | 84.47  | 98.65  |
| Slovakia              | Female | 0 | 0 | 0 | 0 | 0 | 0 | 16.31 | 56.34  | 110.27 | 165.54  | 205.19  | 212.5   | 184.66 | 146.16 | 117.36 | 108.03 | 106.04 | 113.45 | 131.59 | 155.62 |
| Slovenia              | Male   | 0 | 0 | 0 | 0 | 0 | 0 | 15.41 | 53.02  | 101.71 | 147.09  | 173.29  | 171.44  | 140.88 | 104.54 | 82.34  | 77.11  | 74.78  | 76.32  | 84.47  | 98.65  |
| Slovenia              | Female | 0 | 0 | 0 | 0 | 0 | 0 | 16.31 | 56.34  | 110.27 | 165.54  | 205.19  | 212.5   | 184.66 | 146.16 | 117.36 | 108.03 | 106.04 | 113.45 | 131.59 | 155.62 |
| Solomon Islands       | Male   | 0 | 0 | 0 | 0 | 0 | 0 | 4.36  | 10.65  | 14.87  | 22.35   | 32.17   | 39.38   | 40.35  | 37.6   | 36.39  | 40.75  | 45.47  | 52.85  | 63.7   | 79.31  |
| Solomon Islands       | Female | 0 | 0 | 0 | 0 | 0 | 0 | 7.73  | 22.12  | 35.76  | 50.64   | 63.5    | 68.03   | 63.37  | 56.62  | 54.66  | 62.3   | 70.48  | 83.47  | 104.52 | 131.83 |
| Somalia               | Male   | 0 | 0 | 0 | 0 | 0 | 0 | 28.81 | 100.47 | 179.18 | 219.94  | 215.43  | 182.85  | 136.22 | 98.79  | 79.04  | 76.57  | 76.51  | 79.01  | 86.75  | 100.22 |
| Somalia               | Female | 0 | 0 | 0 | 0 | 0 | 0 | 37.57 | 140.34 | 267.59 | 343.87  | 351.39  | 311.02  | 238.73 | 176.47 | 138.2  | 122.79 | 119.35 | 126.6  | 141.38 | 162.55 |
| South Africa          | Male   | 0 | 0 | 0 | 0 | 0 | 0 | 40.6  | 150.74 | 271.06 | 313.02  | 280.77  | 228.61  | 173.92 | 131.89 | 110.76 | 109.97 | 112.23 | 118.64 | 129.33 | 146.01 |
| South Africa          | Female | 0 | 0 | 0 | 0 | 0 | 0 | 45.29 | 176.88 | 334.6  | 407.58  | 387.27  | 331.86  | 266.59 | 216.74 | 186.18 | 176.08 | 174.25 | 183.25 | 201.92 | 227.07 |
| South Sudan           | Male   | 0 | 0 | 0 | 0 | 0 | 0 | 28.81 | 100.47 | 179.18 | 219.94  | 215.43  | 182.85  | 136.22 | 98.79  | 79.04  | 76.57  | 76.51  | 79.01  | 86.75  | 100.22 |
| South Sudan           | Female | 0 | 0 | 0 | 0 | 0 | 0 | 37.57 | 140.34 | 267.59 | 343.87  | 351.39  | 311.02  | 238.73 | 176.47 | 138.2  | 122.79 | 119.35 | 126.6  | 141.38 | 162.55 |
| Spain                 | Male   | 0 | 0 | 0 | 0 | 0 | 0 | 36.38 | 101.59 | 168.72 | 274.83  | 422.11  | 476.44  | 370.63 | 228.36 | 134.64 | 92.73  | 75.51  | 70.18  | 74.41  | 86.98  |
| Spain                 | Female | 0 | 0 | 0 | 0 | 0 | 0 | 56.67 | 198.47 | 455.18 | 881.55  | 1194.82 | 1009.22 | 572.28 | 288.49 | 170.08 | 123.58 | 102.22 | 97.14  | 105.68 | 121.37 |
| Sri Lanka             | Male   | 0 | 0 | 0 | 0 | 0 | 0 | 1.91  | 4.29   | 5.37   | 6.75    | 8.71    | 10.32   | 10.91  | 11.3   | 12.27  | 16.11  | 20.37  | 27.04  | 37.19  | 52.19  |
| Sri Lanka             | Female | 0 | 0 | 0 | 0 | 0 | 0 | 4.04  | 10.17  | 13.98  | 20      | 26.9    | 31.14   | 32.38  | 31.57  | 32.36  | 40.1   | 49.06  | 62.43  | 82.34  | 109.8  |
| Sudan                 | Male   | 0 | 0 | 0 | 0 | 0 | 0 | 13.23 | 39.99  | 67.53  | 89.71   | 97.52   | 90.43   | 74.27  | 58.1   | 47.85  | 48.18  | 51.44  | 57.42  | 66.95  | 80.68  |

| Country              | Gender | 2000 | 2001 | 2002 | 2003 | 2004 | 2005 | 2006  | 2007   | 2008   | 2009   | 2010   | 2011   | 2012   | 2013   | 2014   | 2015   | 2016   | 2017   | 2018   | 2019   | 2020 |
|----------------------|--------|------|------|------|------|------|------|-------|--------|--------|--------|--------|--------|--------|--------|--------|--------|--------|--------|--------|--------|------|
| Sudan                | Female | 0    | 0    | 0    | 0    | 0    | 0    | 19.49 | 68.7   | 143.36 | 223.28 | 259.91 | 238.92 | 185.34 | 132.9  | 98.16  | 86.22  | 87.37  | 100.92 | 122.47 | 147.21 |      |
| Suriname             | Male   | 0    | 0    | 0    | 0    | 0    | 0    | 9.64  | 30.84  | 54.33  | 75.84  | 89.95  | 89.88  | 76.32  | 61.7   | 54.81  | 59.52  | 65.62  | 73.19  | 84.05  | 100.02 |      |
| Suriname             | Female | 0    | 0    | 0    | 0    | 0    | 0    | 15.17 | 54.74  | 110.24 | 163.85 | 192.97 | 189.52 | 159.44 | 124.96 | 104.56 | 102.52 | 105.99 | 119.89 | 141.44 | 165.86 |      |
| Sweden               | Male   | 0    | 0    | 0    | 0    | 0    | 0    | 20.76 | 66.66  | 120.47 | 173.81 | 221.35 | 243.1  | 221.17 | 177.02 | 138.73 | 120.46 | 110.67 | 108.9  | 116.05 | 129.26 |      |
| Sweden               | Female | 0    | 0    | 0    | 0    | 0    | 0    | 24.46 | 89.82  | 184.69 | 274.7  | 332.71 | 340.11 | 292.87 | 235.71 | 193.03 | 171.71 | 159.99 | 160.2  | 172.2  | 193.51 |      |
| Switzerland          | Male   | 0    | 0    | 0    | 0    | 0    | 0    | 48.22 | 130.26 | 204.24 | 307.1  | 435.53 | 476.09 | 370.14 | 226.87 | 131.55 | 89.41  | 72.78  | 68.3   | 73.15  | 86.4   |      |
| Switzerland          | Female | 0    | 0    | 0    | 0    | 0    | 0    | 52.68 | 171.66 | 338.66 | 551.11 | 691.52 | 638.6  | 445.89 | 271.49 | 173.11 | 128.06 | 108.63 | 105.53 | 113.91 | 129.92 |      |
| Syrian Arab Republic | Male   | 0    | 0    | 0    | 0    | 0    | 0    | 13.23 | 39.99  | 67.53  | 89.71  | 97.52  | 90.43  | 74.27  | 58.1   | 47.85  | 48.18  | 51.44  | 57.42  | 66.95  | 80.68  |      |
| Syrian Arab Republic | Female | 0    | 0    | 0    | 0    | 0    | 0    | 19.49 | 68.7   | 143.36 | 223.28 | 259.91 | 238.92 | 185.34 | 132.9  | 98.16  | 86.22  | 87.37  | 100.92 | 122.47 | 147.21 |      |
| Tajikistan           | Male   | 0    | 0    | 0    | 0    | 0    | 0    | 22.44 | 79.13  | 150.54 | 206.35 | 231.16 | 224.19 | 188.63 | 144.76 | 108.49 | 90.96  | 81.68  | 79.72  | 86.4   | 100.81 |      |
| Tajikistan           | Female | 0    | 0    | 0    | 0    | 0    | 0    | 33.29 | 135.15 | 304.33 | 468.78 | 541.1  | 504.41 | 383.85 | 254.29 | 167.89 | 127.79 | 114.46 | 119.59 | 136.6  | 159.85 |      |
| Thailand             | Male   | 0    | 0    | 0    | 0    | 0    | 0    | 1.91  | 4.29   | 5.37   | 6.75   | 8.71   | 10.32  | 10.91  | 11.3   | 12.27  | 16.11  | 20.37  | 27.04  | 37.19  | 52.19  |      |
| Thailand             | Female | 0    | 0    | 0    | 0    | 0    | 0    | 4.04  | 10.17  | 13.98  | 20     | 26.9   | 31.14  | 32.38  | 31.57  | 32.36  | 40.1   | 49.06  | 62.43  | 82.34  | 109.8  |      |
| Timor-Leste          | Male   | 0    | 0    | 0    | 0    | 0    | 0    | 1.91  | 4.29   | 5.37   | 6.75   | 8.71   | 10.32  | 10.91  | 11.3   | 12.27  | 16.11  | 20.37  | 27.04  | 37.19  | 52.19  |      |
| Timor-Leste          | Female | 0    | 0    | 0    | 0    | 0    | 0    | 4.04  | 10.17  | 13.98  | 20     | 26.9   | 31.14  | 32.38  | 31.57  | 32.36  | 40.1   | 49.06  | 62.43  | 82.34  | 109.8  |      |
| Togo                 | Male   | 0    | 0    | 0    | 0    | 0    | 0    | 28.81 | 100.47 | 179.18 | 219.94 | 215.43 | 182.85 | 136.22 | 98.79  | 79.04  | 76.57  | 76.51  | 79.01  | 86.75  | 100.22 |      |
| Togo                 | Female | 0    | 0    | 0    | 0    | 0    | 0    | 37.57 | 140.34 | 267.59 | 343.87 | 351.39 | 311.02 | 238.73 | 176.47 | 138.2  | 122.79 | 119.35 | 126.6  | 141.38 | 162.55 |      |
| Tonga                | Male   | 0    | 0    | 0    | 0    | 0    | 0    | 4.36  | 10.65  | 14.87  | 22.35  | 32.17  | 39.38  | 40.35  | 37.6   | 36.39  | 40.75  | 45.47  | 52.85  | 63.7   | 79.31  |      |
| Tonga                | Female | 0    | 0    | 0    | 0    | 0    | 0    | 7.73  | 22.12  | 35.76  | 50.64  | 63.5   | 68.03  | 63.37  | 56.62  | 54.66  | 62.3   | 70.48  | 83.47  | 104.52 | 131.83 |      |
| Trinidad and Tobago  | Male   | 0    | 0    | 0    | 0    | 0    | 0    | 9.64  | 30.84  | 54.33  | 75.84  | 89.95  | 89.88  | 76.32  | 61.7   | 54.81  | 59.52  | 65.62  | 73.19  | 84.05  | 100.02 |      |
| Trinidad and Tobago  | Female | 0    | 0    | 0    | 0    | 0    | 0    | 15.17 | 54.74  | 110.24 | 163.85 | 192.97 | 189.52 | 159.44 | 124.96 | 104.56 | 102.52 | 105.99 | 119.89 | 141.44 | 165.86 |      |
| Tunisia              | Male   | 0    | 0    | 0    | 0    | 0    | 0    | 13.23 | 39.99  | 67.53  | 89.71  | 97.52  | 90.43  | 74.27  | 58.1   | 47.85  | 48.18  | 51.44  | 57.42  | 66.95  | 80.68  |      |
| Tunisia              | Female | 0    | 0    | 0    | 0    | 0    | 0    | 19.49 | 68.7   | 143.36 | 223.28 | 259.91 | 238.92 | 185.34 | 132.9  | 98.16  | 86.22  | 87.37  | 100.92 | 122.47 | 147.21 |      |
| Turkey               | Male   | 0    | 0    | 0    | 0    | 0    | 0    | 3.2   | 8.27   | 12.73  | 18.32  | 22.51  | 24.13  | 23.32  | 20.67  | 19.06  | 22.03  | 26.74  | 35.84  | 48.71  | 66.39  |      |
| Turkey               | Female | 0    | 0    | 0    | 0    | 0    | 0    | 5.66  | 17.13  | 33.34  | 55.29  | 71.59  | 74.6   | 67     | 56.57  | 49.46  | 51.82  | 58.58  | 73.81  | 99.66  | 133.66 |      |
| Turkmenistan         | Male   | 0    | 0    | 0    | 0    | 0    | 0    | 25.52 | 90.91  | 175.28 | 240.8  | 264.11 | 248.43 | 204.19 | 154.43 | 114.31 | 93.24  | 81.6   | 79.64  | 87.39  | 101.63 |      |
| Turkmenistan         | Female | 0    | 0    | 0    | 0    | 0    | 0    | 21.49 | 81.14  | 172.8  | 265.51 | 321.68 | 322.17 | 268.83 | 199.06 | 142.23 | 114.37 | 106.37 | 115.2  | 135.54 | 162.14 |      |
| Uganda               | Male   | 0    | 0    | 0    | 0    | 0    | 0    | 28.81 | 100.47 | 179.18 | 219.94 | 215.43 | 182.85 | 136.22 | 98.79  | 79.04  | 76.57  | 76.51  | 79.01  | 86.75  | 100.22 |      |
| Uganda               | Female | 0    | 0    | 0    | 0    | 0    | 0    | 37.57 | 140.34 | 267.59 | 343.87 | 351.39 | 311.02 | 238.73 | 176.47 | 138.2  | 122.79 | 119.35 | 126.6  | 141.38 | 162.55 |      |
| Ukraine              | Male   | 0    | 0    | 0    | 0    | 0    | 0    | 20.51 | 71.44  | 134.1  | 178.59 | 193.63 | 188.18 | 164.24 | 135.6  | 115.4  | 110.52 | 108.37 | 113.21 | 125.38 | 142.24 |      |

|                              |        |   |   |   |   |   |   |        |        |        |         |         |         |        |        |        |        |        |        |        |        |
|------------------------------|--------|---|---|---|---|---|---|--------|--------|--------|---------|---------|---------|--------|--------|--------|--------|--------|--------|--------|--------|
| Ukraine                      | Female | 0 | 0 | 0 | 0 | 0 | 0 | 31.23  | 124.67 | 267.76 | 387.62  | 435.29  | 419.43  | 350.76 | 274.97 | 218.5  | 188.16 | 173.1  | 174.93 | 191.11 | 217.42 |
| United Arab Emirates         | Male   | 0 | 0 | 0 | 0 | 0 | 0 | 13.23  | 39.99  | 67.53  | 89.71   | 97.52   | 90.43   | 74.27  | 58.1   | 47.85  | 48.18  | 51.44  | 57.42  | 66.95  | 80.68  |
| United Arab Emirates         | Female | 0 | 0 | 0 | 0 | 0 | 0 | 19.49  | 68.7   | 143.36 | 223.28  | 259.91  | 238.92  | 185.34 | 132.9  | 98.16  | 86.22  | 87.37  | 100.92 | 122.47 | 147.21 |
| United Kingdom               | Male   | 0 | 0 | 0 | 0 | 0 | 0 | 37.43  | 121.68 | 221    | 320.5   | 401.56  | 416.39  | 342.51 | 243.7  | 169.76 | 131.25 | 113.04 | 106.66 | 109.63 | 121.54 |
| United Kingdom               | Female | 0 | 0 | 0 | 0 | 0 | 0 | 42.26  | 161.53 | 346.26 | 532.15  | 624.72  | 581.07  | 444.06 | 313.58 | 228.17 | 184.55 | 162.32 | 155.74 | 163.32 | 179.3  |
| United Republic of Tanzania  | Male   | 0 | 0 | 0 | 0 | 0 | 0 | 28.81  | 100.47 | 179.18 | 219.94  | 215.43  | 182.85  | 136.22 | 98.79  | 79.04  | 76.57  | 76.51  | 79.01  | 86.75  | 100.22 |
| United Republic of Tanzania  | Female | 0 | 0 | 0 | 0 | 0 | 0 | 37.57  | 140.34 | 267.59 | 343.87  | 351.39  | 311.02  | 238.73 | 176.47 | 138.2  | 122.79 | 119.35 | 126.6  | 141.38 | 162.55 |
| United States of America     | Male   | 0 | 0 | 0 | 0 | 0 | 0 | 99.88  | 226.82 | 327.44 | 555.06  | 862.96  | 973.04  | 708.33 | 368.52 | 197.23 | 133.92 | 109.99 | 102.53 | 104.9  | 115.14 |
| United States of America     | Female | 0 | 0 | 0 | 0 | 0 | 0 | 147.26 | 395.34 | 738.69 | 1367.86 | 1794.59 | 1456.74 | 772.01 | 334.32 | 173.86 | 125.8  | 112.78 | 115.78 | 127.54 | 145.44 |
| United States Virgin Islands | Male   | 0 | 0 | 0 | 0 | 0 | 0 | 9.64   | 30.84  | 54.33  | 75.84   | 89.95   | 89.88   | 76.32  | 61.7   | 54.81  | 59.52  | 65.62  | 73.19  | 84.05  | 100.02 |
| United States Virgin Islands | Female | 0 | 0 | 0 | 0 | 0 | 0 | 15.17  | 54.74  | 110.24 | 163.85  | 192.97  | 189.52  | 159.44 | 124.96 | 104.56 | 102.52 | 105.99 | 119.89 | 141.44 | 165.86 |
| Uruguay                      | Male   | 0 | 0 | 0 | 0 | 0 | 0 | 28.21  | 89.98  | 163.3  | 241.06  | 310.76  | 332.12  | 274.99 | 189.13 | 125.51 | 95.53  | 82     | 77.84  | 82.59  | 93.46  |
| Uruguay                      | Female | 0 | 0 | 0 | 0 | 0 | 0 | 67.37  | 270.3  | 610.21 | 940.34  | 1040.86 | 828.82  | 486.5  | 253.62 | 148.16 | 110.62 | 99.69  | 104.1  | 117.8  | 136.04 |
| Uzbekistan                   | Male   | 0 | 0 | 0 | 0 | 0 | 0 | 22.44  | 79.13  | 150.54 | 206.35  | 231.16  | 224.19  | 188.63 | 144.76 | 108.49 | 90.96  | 81.68  | 79.72  | 86.4   | 100.81 |
| Uzbekistan                   | Female | 0 | 0 | 0 | 0 | 0 | 0 | 33.29  | 135.15 | 304.33 | 468.78  | 541.1   | 504.41  | 383.85 | 254.29 | 167.89 | 127.79 | 114.46 | 119.59 | 136.6  | 159.85 |
| Vanuatu                      | Male   | 0 | 0 | 0 | 0 | 0 | 0 | 4.36   | 10.65  | 14.87  | 22.35   | 32.17   | 39.38   | 40.35  | 37.6   | 36.39  | 40.75  | 45.47  | 52.85  | 63.7   | 79.31  |
| Vanuatu                      | Female | 0 | 0 | 0 | 0 | 0 | 0 | 7.73   | 22.12  | 35.76  | 50.64   | 63.5    | 68.03   | 63.37  | 56.62  | 54.66  | 62.3   | 70.48  | 83.47  | 104.52 | 131.83 |
| Venezuela                    | Male   | 0 | 0 | 0 | 0 | 0 | 0 | 3.79   | 11.03  | 19.8   | 31.93   | 41.55   | 44.12   | 40.74  | 35.61  | 33.08  | 36.15  | 41.12  | 51.15  | 66.35  | 87.94  |
| Venezuela                    | Female | 0 | 0 | 0 | 0 | 0 | 0 | 6.34   | 21.49  | 43.93  | 71.2    | 91.65   | 97.04   | 88.44  | 75.45  | 67.57  | 71.31  | 78.33  | 94.02  | 120.82 | 155.41 |
| Viet Nam                     | Male   | 0 | 0 | 0 | 0 | 0 | 0 | 1.91   | 4.29   | 5.37   | 6.75    | 8.71    | 10.32   | 10.91  | 11.3   | 12.27  | 16.11  | 20.37  | 27.04  | 37.19  | 52.19  |
| Viet Nam                     | Female | 0 | 0 | 0 | 0 | 0 | 0 | 4.04   | 10.17  | 13.98  | 20      | 26.9    | 31.14   | 32.38  | 31.57  | 32.36  | 40.1   | 49.06  | 62.43  | 82.34  | 109.8  |
| Yemen                        | Male   | 0 | 0 | 0 | 0 | 0 | 0 | 13.23  | 39.99  | 67.53  | 89.71   | 97.52   | 90.43   | 74.27  | 58.1   | 47.85  | 48.18  | 51.44  | 57.42  | 66.95  | 80.68  |
| Yemen                        | Female | 0 | 0 | 0 | 0 | 0 | 0 | 19.49  | 68.7   | 143.36 | 223.28  | 259.91  | 238.92  | 185.34 | 132.9  | 98.16  | 86.22  | 87.37  | 100.92 | 122.47 | 147.21 |
| Zambia                       | Male   | 0 | 0 | 0 | 0 | 0 | 0 | 28.81  | 100.47 | 179.18 | 219.94  | 215.43  | 182.85  | 136.22 | 98.79  | 79.04  | 76.57  | 76.51  | 79.01  | 86.75  | 100.22 |
| Zambia                       | Female | 0 | 0 | 0 | 0 | 0 | 0 | 37.57  | 140.34 | 267.59 | 343.87  | 351.39  | 311.02  | 238.73 | 176.47 | 138.2  | 122.79 | 119.35 | 126.6  | 141.38 | 162.55 |
| Zimbabwe                     | Male   | 0 | 0 | 0 | 0 | 0 | 0 | 49.38  | 164.05 | 267    | 295.79  | 263.29  | 205.58  | 142.41 | 97.55  | 76.13  | 73.35  | 74.27  | 77.94  | 85.3   | 97.85  |
| Zimbabwe                     | Female | 0 | 0 | 0 | 0 | 0 | 0 | 55.57  | 195.99 | 335.88 | 383.13  | 355.75  | 299.25  | 226.68 | 167.8  | 131.69 | 118.01 | 114.99 | 123.73 | 139.65 | 161.55 |



Supplementary Table S5. The DALYs and age-standardized DALYs rate of hand osteoarthritis in 1990 and 2019, and its temporal trends from 1990 to 2019.

Supplementary Table S5. The DALYs cases and age-standardized DALYs rate of hand osteoarthritis in 1990 and 2019, and its temporal trends from 1990 to 2019.

| Nation                          | Sex  | DALYs cases No. (95% UI) |                        | change absolute<br>number (%) | DALYs per 100,000 No. (95% UI) |                       | 1990-2019 EAPC No. (95% CI) |
|---------------------------------|------|--------------------------|------------------------|-------------------------------|--------------------------------|-----------------------|-----------------------------|
|                                 |      | 1990                     | 2019                   |                               | 1990                           | 2019                  |                             |
| Afghanistan                     | Both | 20.55 [9.96-43.75]       | 38.79 [19.03-80.26]    | 88.76                         | 28.06 [13.85-59.57]            | 28.79 [14.25-60.53]   | 0.11 [0.09 to 0.13]         |
| Albania                         | Both | 6.7 [3.3-14.21]          | 13.36 [6.51-27.9]      | 99.4                          | 31.65 [15.46-66.8]             | 31.66 [15.37-66.95]   | 0 [0 to 0.01]               |
| Algeria                         | Both | 36.84 [17.8-77.78]       | 101.54 [49.68-213.09]  | 175.62                        | 29.16 [14.26-61.47]            | 28.77 [14.12-60.19]   | -0.06 [-0.07 to -0.05]      |
| American Samoa                  | Both | 0.02 [0.01-0.04]         | 0.04 [0.02-0.09]       | 100                           | 8.79 [4.2-18.47]               | 8.84 [4.27-18.42]     | 0.03 [0.02 to 0.03]         |
| Andorra                         | Both | 0.8 [0.4-1.66]           | 1.96 [0.98-4.13]       | 145                           | 139.66 [70.47-292.77]          | 139.19 [69.86-293.69] | 0.78 [0.51 to 1.04]         |
| Angola                          | Both | 21.78 [10.66-45.22]      | 65.5 [31.91-136.27]    | 200.73                        | 51.79 [25.79-107.57]           | 52.94 [26.08-109.49]  | 0.08 [0.08 to 0.08]         |
| Antigua and Barbuda             | Both | 0.13 [0.06-0.27]         | 0.25 [0.12-0.53]       | 92.31                         | 24.92 [12.25-52.16]            | 24.31 [11.78-49.85]   | -0.09 [-0.09 to -0.08]      |
| Argentina                       | Both | 339.7 [170.03-709.92]    | 549.78 [271.8-1141.54] | 61.84                         | 105.2 [52.72-219.98]           | 104.86 [52.01-218.47] | -0.01 [-0.02 to 0]          |
| Armenia                         | Both | 17.87 [8.77-37.88]       | 26.76 [13.14-56]       | 49.75                         | 64.58 [31.46-135.8]            | 64.49 [31.75-134.35]  | -0.01 [-0.02 to -0.01]      |
| Australia                       | Both | 200.41 [99.71-422.66]    | 418.93 [208.25-870.93] | 109.04                        | 105.22 [52.6-221.89]           | 109.07 [54.94-227.69] | -0.29 [-0.45 to -0.13]      |
| Austria                         | Both | 136.34 [68.36-289.68]    | 202.84 [100.85-433.78] | 48.78                         | 124.42 [62.77-259.45]          | 127.1 [63.29-267.09]  | 0.78 [0.55 to 1.01]         |
| Azerbaijan                      | Both | 37.99 [18.65-80.11]      | 73.22 [36.08-155.08]   | 92.73                         | 74.99 [37.03-155.63]           | 72.32 [35.63-150.62]  | 0.2 [0.01 to 0.4]           |
| Bahamas                         | Both | 0.39 [0.19-0.82]         | 1 [0.48-2.11]          | 156.41                        | 24.98 [12.3-52.15]             | 24.67 [11.96-51.66]   | -0.06 [-0.06 to -0.05]      |
| Bahrain                         | Both | 0.56 [0.27-1.19]         | 3.38 [1.63-7.05]       | 503.57                        | 27.86 [13.58-59.15]            | 26.26 [12.91-55.22]   | -0.21 [-0.24 to -0.18]      |
| Bangladesh                      | Both | 110.97 [53.87-234.67]    | 320.32 [153.99-659.36] | 188.65                        | 23.6 [11.59-48.95]             | 24.23 [11.77-49.91]   | 0.1 [0.08 to 0.12]          |
| Barbados                        | Both | 0.69 [0.34-1.42]         | 1.19 [0.58-2.44]       | 72.46                         | 25.19 [12.43-52.05]            | 24.59 [12.09-50.75]   | -0.08 [-0.08 to -0.07]      |
| Belarus                         | Both | 93.93 [46.32-198.23]     | 112.13 [55.77-236.31]  | 19.38                         | 72.32 [35.9-151.65]            | 71.86 [35.94-149.68]  | -0.01 [-0.02 to 0]          |
| Belgium                         | Both | 156.69 [77.47-332.17]    | 218.39 [108.37-459.93] | 39.38                         | 107.88 [53.33-226.03]          | 108.04 [53.65-225]    | 0.4 [0.27 to 0.52]          |
| Belize                          | Both | 0.22 [0.11-0.46]         | 0.68 [0.33-1.42]       | 209.09                        | 23.97 [11.65-50.35]            | 23.76 [11.62-48.74]   | -0.03 [-0.04 to -0.02]      |
| Benin                           | Both | 10.56 [5.16-21.9]        | 27.43 [13.31-56.63]    | 159.75                        | 52.05 [25.64-108.32]           | 52.64 [25.71-109.36]  | 0.04 [0.03 to 0.05]         |
| Bermuda                         | Both | 0.16 [0.08-0.33]         | 0.31 [0.15-0.64]       | 93.75                         | 25.05 [12.33-51.9]             | 24.66 [12.1-51.44]    | -0.05 [-0.06 to -0.05]      |
| Bhutan                          | Both | 0.61 [0.3-1.28]          | 1.38 [0.68-2.88]       | 126.23                        | 24.81 [12.19-51.5]             | 24.3 [11.97-50.79]    | -0.06 [-0.08 to -0.04]      |
| Bolivia(Plurinational State of) | Both | 11.7 [5.7-24.49]         | 32.18 [15.69-65.63]    | 175.04                        | 35.98 [17.54-75.45]            | 35.68 [17.43-73.72]   | -0.02 [-0.03 to -0.02]      |
| Bosnia and Herzegovina          | Both | 13.38 [6.52-28.33]       | 18.29 [8.95-38.3]      | 36.7                          | 31.71 [15.47-66.91]            | 31.43 [15.29-65.52]   | -0.03 [-0.04 to -0.03]      |
| Botswana                        | Both | 3.87 [1.92-8.11]         | 9.75 [4.82-20.12]      | 151.94                        | 64.28 [31.98-133.7]            | 63.74 [31.7-131.63]   | -0.02 [-0.02 to -0.01]      |

|                                       |      |                           |                           |        |                       |                       |                        |
|---------------------------------------|------|---------------------------|---------------------------|--------|-----------------------|-----------------------|------------------------|
| Brazil                                | Both | 235.12 [113.52-483.84]    | 638.3 [309.39-1314.76]    | 171.48 | 26.2 [12.71-53.84]    | 26.64 [12.95-54.83]   | 0.05 [0.04 to 0.05]    |
| Brunei Darussalam                     | Both | 1.11 [0.56-2.35]          | 3.81 [1.92-7.91]          | 243.24 | 107.52 [54.52-223.8]  | 111.05 [55.79-230.76] | 0.11 [0.1 to 0.13]     |
| Bulgaria                              | Both | 38.98 [18.9-82.05]        | 43.04 [21.16-90.94]       | 10.42  | 31.52 [15.26-66.87]   | 31.67 [15.69-66.64]   | 0.01 [0.01 to 0.02]    |
| Burkina Faso                          | Both | 23.64 [11.59-48.72]       | 52.03 [25.42-107.31]      | 120.09 | 52.06 [25.6-107.96]   | 53.06 [26.11-109.74]  | 0.07 [0.06 to 0.08]    |
| Burundi                               | Both | 12.55 [6.15-25.97]        | 25.41 [12.38-52.87]       | 102.47 | 52.72 [25.93-109.28]  | 51.32 [25.17-107.19]  | -0.1 [-0.1 to -0.09]   |
| Cabo Verde                            | Both | 1.17 [0.58-2.44]          | 2.36 [1.16-4.91]          | 101.71 | 54.1 [26.3-112.76]    | 53.39 [26.29-111.65]  | -0.05 [-0.06 to -0.03] |
| Cambodia                              | Both | 1.7 [0.76-3.67]           | 4.63 [2.06-9.94]          | 172.35 | 3.9 [1.77-8.2]        | 3.96 [1.8-8.35]       | 0.06 [0.05 to 0.07]    |
| Cameroon                              | Both | 24.5 [11.98-50.52]        | 67.04 [32.59-138.7]       | 173.63 | 51.8 [25.64-107.6]    | 52.1 [25.79-108.9]    | 0.03 [0.02 to 0.03]    |
| Canada                                | Both | 472.01 [235.32-985.73]    | 942.23 [470.28-1979.45]   | 99.62  | 149.82 [74.64-311.37] | 148.46 [74-310.61]    | -0.03 [-0.04 to -0.03] |
| Central African Republic              | Both | 6.45 [3.18-13.46]         | 12.44 [6.14-25.88]        | 92.87  | 52.37 [26.16-108.76]  | 52.8 [26.2-109.12]    | 0.03 [0.03 to 0.03]    |
| Chad                                  | Both | 14.86 [7.26-31.1]         | 30.57 [14.92-63.74]       | 105.72 | 52.26 [25.49-108.79]  | 50.84 [24.93-106.09]  | -0.11 [-0.11 to -0.1]  |
| Chile                                 | Both | 106 [52.44-222.64]        | 249.66 [124.32-521.11]    | 135.53 | 104.35 [51.71-218.24] | 103.87 [51.52-215.21] | -0.02 [-0.02 to -0.01] |
| China                                 | Both | 2222.54 [1081.57-4697.46] | 6230.67 [3040.33-12983.9] | 180.34 | 26.08 [12.91-54.45]   | 30.12 [14.75-62.79]   | -0.14 [-0.5 to 0.22]   |
| Colombia                              | Both | 48.74 [23.36-103]         | 147.76 [71.05-311.44]     | 203.16 | 27.23 [13.19-58.02]   | 27.74 [13.35-58.42]   | 0.08 [0.07 to 0.08]    |
| Comoros                               | Both | 1.18 [0.58-2.43]          | 2.67 [1.31-5.54]          | 126.27 | 52.13 [25.63-107.66]  | 52.87 [26.04-109.48]  | 0.05 [0.04 to 0.06]    |
| Congo                                 | Both | 5.85 [2.87-12.2]          | 15.12 [7.37-30.95]        | 158.46 | 52.95 [26.07-110.86]  | 52.06 [25.73-107.7]   | -0.06 [-0.07 to -0.06] |
| Costa Rica                            | Both | 4.77 [2.3-9.96]           | 14.38 [6.97-30.43]        | 201.47 | 27.27 [13.23-56.86]   | 27.58 [13.37-58.23]   | 0.04 [0.04 to 0.04]    |
| Cote d'Ivoire                         | Both | 22.49 [10.92-46.62]       | 60.5 [29.4-125.48]        | 169.01 | 50.45 [24.83-104.57]  | 51.27 [25.12-106.08]  | 0.04 [0.03 to 0.06]    |
| Croatia                               | Both | 22.13 [10.62-46.08]       | 25.57 [12.71-53.5]        | 15.54  | 34.3 [16.55-70.93]    | 31.42 [15.63-66.05]   | -0.34 [-0.42 to -0.25] |
| Cuba                                  | Both | 24.37 [11.92-51.16]       | 45.52 [22.24-94.77]       | 86.79  | 23.97 [11.72-50.34]   | 24.21 [11.77-50.45]   | 0.03 [0.03 to 0.03]    |
| Cyprus                                | Both | 9.61 [4.75-20.26]         | 22.15 [10.98-47.13]       | 130.49 | 117.54 [58.2-247.37]  | 117.57 [58.46-247.33] | 0.5 [0.34 to 0.66]     |
| Czechia                               | Both | 42.42 [20.6-89.41]        | 61.05 [30.21-127.17]      | 43.92  | 31.5 [15.36-66.87]    | 31.24 [15.41-66.64]   | -0.03 [-0.04 to -0.03] |
| Democratic People's Republic of Korea | Both | 45.18 [21.89-95.44]       | 88.77 [43.26-186.19]      | 96.48  | 27.29 [13.25-57.44]   | 27.27 [13.29-57.28]   | 0 [0 to 0]             |
| Democratic Republic of the Congo      | Both | 87.51 [43.09-180.45]      | 203.02 [100.21-426.58]    | 132    | 51.84 [25.55-106.35]  | 52.72 [26.18-110.37]  | 0.06 [0.04 to 0.07]    |
| Denmark                               | Both | 98.12 [49.36-206.1]       | 120.92 [59.53-257.08]     | 23.24  | 131.62 [66.17-275.08] | 117.35 [57.9-246.68]  | -0.06 [-0.16 to 0.04]  |
| Djibouti                              | Both | 0.82 [0.4-1.69]           | 3.48 [1.68-7.16]          | 324.39 | 51.91 [25.55-107.28]  | 51.14 [25.09-106.37]  | -0.06 [-0.06 to -0.05] |
| Dominica                              | Both | 0.17 [0.08-0.35]          | 0.21 [0.1-0.44]           | 23.53  | 25.24 [12.37-52.64]   | 23.8 [11.62-50.07]    | -0.24 [-0.25 to -0.22] |
| Dominican Republic                    | Both | 9.06 [4.44-18.84]         | 22.72 [11.15-46.56]       | 150.77 | 24.1 [11.89-49.78]    | 24.2 [11.86-49.43]    | 0 [-0.01 to 0]         |

|                            |      |                         |                           |        |                       |                      |                        |
|----------------------------|------|-------------------------|---------------------------|--------|-----------------------|----------------------|------------------------|
| Ecuador                    | Both | 27.18 [13.45-57.54]     | 89.56 [44.84-185.32]      | 229.51 | 49.99 [24.49-105.18]  | 58.25 [29.14-120.27] | 0.72 [0.58 to 0.85]    |
| Egypt                      | Both | 88.21 [42.87-186.1]     | 190.25 [92.42-400.66]     | 115.68 | 29.11 [14.36-61.08]   | 27.9 [13.71-59.19]   | -0.15 [-0.15 to -0.15] |
| El Salvador                | Both | 8.16 [3.9-17.23]        | 16.42 [8.01-34.71]        | 101.23 | 27.54 [13.18-58.03]   | 27.96 [13.6-59.22]   | 0.06 [0.06 to 0.06]    |
| Equatorial Guinea          | Both | 1.08 [0.54-2.25]        | 2.79 [1.36-5.83]          | 158.33 | 52.5 [26.04-109.36]   | 53.39 [26.44-111.39] | 0.05 [0.04 to 0.07]    |
| Eritrea                    | Both | 5.77 [2.83-11.91]       | 15.65 [7.67-32.66]        | 171.23 | 53.68 [26.52-111.76]  | 53.44 [26.59-110.27] | -0.01 [-0.01 to 0]     |
| Estonia                    | Both | 14.72 [7.23-30.8]       | 16.99 [8.38-35.81]        | 15.42  | 72.33 [35.79-150.17]  | 71.17 [34.94-148.99] | -0.04 [-0.05 to -0.04] |
| Eswatini                   | Both | 2.05 [1.02-4.25]        | 3.96 [1.99-8.18]          | 93.17  | 64.42 [32.21-133.37]  | 64.17 [32.17-132.73] | -0.01 [-0.02 to -0.01] |
| Ethiopia                   | Both | 111.29 [55.2-233.19]    | 236.78 [117.39-497.34]    | 112.76 | 53.72 [26.66-111.79]  | 54.18 [26.84-113.45] | 0.05 [0.03 to 0.07]    |
| Fiji                       | Both | 0.32 [0.15-0.69]        | 0.67 [0.31-1.43]          | 109.38 | 8.87 [4.25-18.71]     | 8.93 [4.27-18.88]    | 0.01 [0 to 0.02]       |
| Finland                    | Both | 45.61 [22.79-95.73]     | 68.02 [33.68-141.28]      | 49.13  | 66.13 [33-138.53]     | 62.76 [30.89-130.99] | -0.19 [-0.2 to -0.18]  |
| France                     | Both | 628.88 [312.08-1332.56] | 959.18 [477.35-2013.12]   | 52.52  | 80.4 [39.99-168.03]   | 79.81 [39.96-168.54] | -0.01 [-0.01 to 0]     |
| Gabon                      | Both | 3 [1.49-6.25]           | 5.89 [2.88-12.23]         | 96.33  | 53.04 [26.36-111.4]   | 52.43 [26.13-108.76] | -0.05 [-0.05 to -0.04] |
| Gambia                     | Both | 1.91 [0.93-3.98]        | 5.21 [2.58-10.72]         | 172.77 | 51.29 [25.34-107.47]  | 52.04 [25.9-106.96]  | 0.06 [0.05 to 0.06]    |
| Germany                    | Both | 688.58 [340.18-1445.93] | 915 [458.59-1889.13]      | 32.88  | 56.4 [27.68-118.26]   | 53.64 [27.05-110.65] | -0.18 [-0.19 to -0.17] |
| Ghana                      | Both | 34.82 [17.07-73.04]     | 92.08 [44.9-192.72]       | 164.45 | 52.31 [25.89-108.88]  | 53.38 [26.43-111.01] | 0.07 [0.06 to 0.08]    |
| Greece                     | Both | 50.72 [25-104.4]        | 71.1 [35.61-146.07]       | 40.18  | 33.97 [16.89-69.76]   | 33.82 [16.8-69.61]   | 0.85 [0.49 to 1.2]     |
| Greenland                  | Both | 0.53 [0.27-1.11]        | 1.06 [0.52-2.22]          | 100    | 142.97 [71.16-296.24] | 141.6 [70.74-293.47] | -0.03 [-0.05 to -0.01] |
| Grenada                    | Both | 0.17 [0.08-0.35]        | 0.28 [0.13-0.58]          | 64.71  | 25 [12.26-51.74]      | 24.18 [11.85-50.41]  | -0.1 [-0.12 to -0.08]  |
| Guam                       | Both | 0.07 [0.03-0.14]        | 0.17 [0.08-0.36]          | 142.86 | 8.89 [4.3-18.49]      | 8.95 [4.31-18.63]    | 0.03 [0.01 to 0.04]    |
| Guatemala                  | Both | 10.15 [4.94-21.25]      | 30.54 [14.95-63.27]       | 200.89 | 26.89 [13.03-55.91]   | 27.53 [13.43-57.55]  | 0.08 [0.08 to 0.09]    |
| Guinea                     | Both | 17.49 [8.51-36.44]      | 29.69 [14.52-61.79]       | 69.75  | 51.81 [25.28-107.09]  | 51.75 [25.58-107.68] | -0.01 [-0.02 to -0.01] |
| Guinea-Bissau              | Both | 2.19 [1.07-4.52]        | 4.09 [1.98-8.4]           | 86.76  | 52.09 [25.73-107.84]  | 52.93 [25.95-109.02] | 0.05 [0.04 to 0.05]    |
| Guyana                     | Both | 0.92 [0.45-1.92]        | 1.55 [0.76-3.26]          | 68.48  | 23.92 [11.83-48.99]   | 24.07 [11.82-49.86]  | 0.02 [0.01 to 0.03]    |
| Haiti                      | Both | 7.89 [3.84-16.44]       | 17.32 [8.35-36.45]        | 119.52 | 24.12 [11.79-50]      | 24.07 [11.8-49.81]   | 0 [-0.01 to 0]         |
| Honduras                   | Both | 5.67 [2.71-11.98]       | 16.86 [8.13-35.05]        | 197.35 | 27.19 [13.01-57.96]   | 27.34 [13.24-56.93]  | 0.01 [0 to 0.02]       |
| Hungary                    | Both | 45.47 [22.37-95.61]     | 57.18 [27.87-121.65]      | 25.75  | 31.47 [15.45-66.29]   | 31.59 [15.5-66.84]   | 0.02 [0.02 to 0.03]    |
| Iceland                    | Both | 4.91 [2.47-10.17]       | 9.3 [4.61-19.22]          | 89.41  | 182.36 [91.56-374.93] | 179.59 [88.5-373.71] | 0 [-1.02 to 1.03]      |
| India                      | Both | 1180.67 [572.5-2496.49] | 3024.43 [1495.86-6330.35] | 156.16 | 25.73 [12.81-53.82]   | 26.41 [13.17-55.04]  | 0.1 [0.1 to 0.11]      |
| Indonesia                  | Both | 43.54 [19.62-92.92]     | 98.59 [45.2-210.13]       | 126.44 | 4.52 [2.12-9.39]      | 4.57 [2.09-9.42]     | 0.04 [0.04 to 0.04]    |
| Iran (Islamic Republic of) | Both | 121.23 [59.78-257.02]   | 353.65 [174.48-741.52]    | 191.72 | 44.69 [21.99-93.74]   | 46.17 [22.73-96.78]  | 0.14 [0 to 0.28]       |

|                                  |      |                         |                           |        |                       |                       |                        |
|----------------------------------|------|-------------------------|---------------------------|--------|-----------------------|-----------------------|------------------------|
| Iraq                             | Both | 22.81 [11.04-48.77]     | 70.7 [34.37-148.45]       | 209.95 | 28.89 [14.15-61.7]    | 29.07 [14.2-60.89]    | 0.02 [0.02 to 0.03]    |
| Ireland                          | Both | 33.3 [16.6-70.47]       | 60.5 [30.03-127.46]       | 81.68  | 85.08 [42.38-179.18]  | 84.5 [41.9-177.88]    | -0.02 [-0.02 to -0.02] |
| Israel                           | Both | 55.99 [27.67-118.49]    | 130.56 [64.6-274.97]      | 133.18 | 120.05 [59.55-254.15] | 119.73 [59.09-252.38] | -0.54 [-0.79 to -0.29] |
| Italy                            | Both | 619.36 [304.82-1289.48] | 905.54 [453.32-1885.97]   | 46.21  | 72.37 [35.76-151.35]  | 71.95 [35.69-151.16]  | 0.22 [-0.02 to 0.46]   |
| Jamaica                          | Both | 4.21 [2.06-8.64]        | 7.24 [3.58-15.18]         | 71.97  | 24.51 [11.96-50.33]   | 24.07 [11.9-50.43]    | -0.06 [-0.07 to -0.05] |
| Japan                            | Both | 1353 [660.28-2811.59]   | 2727.85 [1346.35-5696.49] | 101.61 | 79 [38.66-164.18]     | 93.39 [46.08-197.07]  | 1.69 [1.29 to 2.09]    |
| Jordan                           | Both | 4.11 [2-8.7]            | 20.53 [9.96-42.87]        | 399.51 | 28.79 [13.94-60.52]   | 28.44 [13.82-60.14]   | -0.03 [-0.03 to -0.02] |
| Kazakhstan                       | Both | 84.27 [41.61-177.76]    | 116.03 [57.29-245.98]     | 37.69  | 66.26 [32.57-139.28]  | 65.11 [31.91-137.41]  | -0.06 [-0.06 to -0.05] |
| Kenya                            | Both | 46.47 [23.19-97.32]     | 130.06 [64.55-271.11]     | 179.88 | 54.36 [27.03-113.22]  | 55.04 [27.34-115.33]  | 0.05 [0.05 to 0.06]    |
| Kuwait                           | Both | 1.86 [0.89-3.84]        | 8.7 [4.2-17.98]           | 367.74 | 26.48 [12.91-56.63]   | 26.92 [13.18-57.2]    | 0.09 [0.05 to 0.13]    |
| Kyrgyzstan                       | Both | 19.9 [9.8-41.68]        | 31.06 [15.25-65.31]       | 56.08  | 65.83 [32.38-137.57]  | 64.81 [31.95-136.44]  | -0.04 [-0.05 to -0.03] |
| Lao People's Democratic Republic | Both | 0.75 [0.34-1.59]        | 1.63 [0.72-3.44]          | 117.33 | 3.81 [1.73-7.95]      | 3.75 [1.7-7.88]       | -0.03 [-0.04 to -0.02] |
| Latvia                           | Both | 25.66 [12.75-53.75]     | 25.95 [12.82-54.58]       | 1.13   | 72.04 [35.84-150.28]  | 71.49 [35.1-150.86]   | -0.02 [-0.02 to -0.01] |
| Lebanon                          | Both | 6.83 [3.33-14.69]       | 15.47 [7.62-32.67]        | 126.5  | 29.13 [14.23-62.36]   | 29.97 [14.79-63.21]   | 0.1 [0.09 to 0.11]     |
| Lesotho                          | Both | 6.54 [3.24-13.52]       | 8.55 [4.26-17.77]         | 30.73  | 64.56 [32.13-132.54]  | 64.07 [32.18-132.47]  | -0.02 [-0.03 to -0.02] |
| Liberia                          | Both | 5.66 [2.77-11.77]       | 11.62 [5.72-23.61]        | 105.3  | 50.37 [24.82-105.01]  | 50.83 [25.12-104.06]  | 0.04 [0.03 to 0.04]    |
| Libya                            | Both | 5.44 [2.67-11.54]       | 15.74 [7.72-33.53]        | 189.34 | 28.33 [13.98-59.57]   | 28.65 [14.09-60.84]   | 0.06 [0.05 to 0.06]    |
| Lithuania                        | Both | 18.56 [9.24-39.24]      | 22.02 [11.02-45.6]        | 18.64  | 41.18 [20.51-87.34]   | 41.19 [20.4-85.6]     | 0.24 [0.09 to 0.39]    |
| Luxembourg                       | Both | 4.55 [2.26-9.6]         | 8.05 [4-17.07]            | 76.92  | 85.76 [42.65-178.95]  | 83.96 [41.47-177.29]  | -0.07 [-0.07 to -0.07] |
| Madagascar                       | Both | 27.4 [13.48-57.12]      | 63.45 [31.05-131.69]      | 131.57 | 51.5 [25.48-107.07]   | 52.27 [25.71-108.35]  | 0.06 [0.05 to 0.06]    |
| Malawi                           | Both | 21.1 [10.23-44.08]      | 40.45 [19.91-83.91]       | 91.71  | 52.21 [25.83-108.7]   | 52.99 [26.19-109.8]   | 0.07 [0.06 to 0.08]    |
| Malaysia                         | Both | 3.4 [1.52-7.33]         | 9.78 [4.33-20.79]         | 187.65 | 3.7 [1.68-7.68]       | 3.66 [1.64-7.68]      | -0.05 [-0.07 to -0.04] |
| Maldives                         | Both | 0.03 [0.01-0.06]        | 0.11 [0.05-0.24]          | 266.67 | 3.33 [1.49-6.98]      | 3.52 [1.61-7.46]      | 0.25 [0.21 to 0.28]    |
| Mali                             | Both | 22.29 [10.92-46.57]     | 46.99 [22.8-98.5]         | 110.81 | 51.7 [25.35-108.14]   | 51.5 [25.21-107]      | -0.01 [-0.01 to 0]     |
| Malta                            | Both | 3.65 [1.81-7.73]        | 7.05 [3.49-14.77]         | 93.15  | 85.68 [42.52-181.42]  | 84.55 [41.78-177.66]  | -0.04 [-0.05 to -0.04] |
| Marshall Islands                 | Both | 0.01 [0.01-0.03]        | 0.03 [0.01-0.06]          | 200    | 8.92 [4.26-18.8]      | 8.65 [4.13-18.1]      | -0.11 [-0.13 to -0.11] |
| Mauritania                       | Both | 5.36 [2.63-11.2]        | 11.38 [5.59-23.81]        | 112.31 | 52.6 [25.98-108.98]   | 52.14 [25.85-109.12]  | -0.03 [-0.04 to -0.02] |
| Mauritius                        | Both | 0.28 [0.12-0.59]        | 0.66 [0.3-1.4]            | 135.71 | 3.86 [1.73-8.07]      | 3.8 [1.73-8.04]       | -0.06 [-0.07 to -0.05] |
| Mexico                           | Both | 310.69 [154.58-647.26]  | 1017.07 [506.01-2096.82]  | 227.36 | 70.54 [34.94-147.12]  | 84.34 [42.02-174.2]   | 0.86 [0.68 to 1.03]    |
| Micronesia (Federated States of) | Both | 0.04 [0.02-0.08]        | 0.06 [0.03-0.13]          | 50     | 8.92 [4.22-18.64]     | 8.99 [4.35-18.55]     | 0.03 [0.02 to 0.04]    |

|                          |      |                        |                          |        |                       |                      |                        |
|--------------------------|------|------------------------|--------------------------|--------|-----------------------|----------------------|------------------------|
| Mongolia                 | Both | 6.65 [3.27-14.02]      | 16.21 [7.98-33.7]        | 143.76 | 63.66 [31.35-133.97]  | 64.81 [31.65-135.56] | 0.07 [0.06 to 0.08]    |
| Montenegro               | Both | 2 [0.97-4.25]          | 3.05 [1.49-6.33]         | 52.5   | 31.69 [15.5-66.8]     | 31.54 [15.51-66.15]  | -0.02 [-0.02 to -0.02] |
| Morocco                  | Both | 40.82 [20.18-86.74]    | 95.3 [46.49-200.24]      | 133.46 | 29.28 [14.59-61.7]    | 29.08 [14.31-61.08]  | -0.04 [-0.05 to -0.03] |
| Mozambique               | Both | 33.16 [16.15-68.96]    | 61.6 [30.18-127.98]      | 85.77  | 51.87 [25.46-107.3]   | 52.75 [26.44-108.4]  | 0.07 [0.06 to 0.07]    |
| Myanmar                  | Both | 8.47 [3.78-17.8]       | 17.98 [7.88-38.64]       | 112.28 | 3.8 [1.71-8.06]       | 3.9 [1.75-8.21]      | 0.1 [0.09 to 0.1]      |
| Namibia                  | Both | 4.7 [2.35-9.7]         | 9.58 [4.77-19.91]        | 103.83 | 63.89 [31.66-131.74]  | 64.17 [31.75-131.99] | 0.02 [0.01 to 0.02]    |
| Nepal                    | Both | 23 [11.16-49.49]       | 55.84 [27.31-117.46]     | 142.78 | 24.09 [11.78-50.78]   | 24.78 [11.93-51.92]  | 0.09 [0.08 to 0.1]     |
| Netherlands              | Both | 122.89 [62.74-248.82]  | 188.09 [94.14-400.61]    | 53.06  | 64.03 [32.49-130.19]  | 60.04 [29.79-127.79] | -0.37 [-0.59 to -0.15] |
| New Zealand              | Both | 42.66 [21.23-87.79]    | 82.15 [40.81-170.3]      | 92.57  | 112.55 [55.93-235.14] | 112.58 [56.1-236.6]  | 0 [0 to 0]             |
| Nicaragua                | Both | 4.26 [2.06-8.98]       | 12.62 [6.14-26.94]       | 196.24 | 27.51 [13.26-57.7]    | 27.72 [13.46-59.17]  | 0.03 [0.02 to 0.03]    |
| Niger                    | Both | 15.5 [7.56-32.24]      | 43.78 [21.52-91.53]      | 182.45 | 51.53 [25.48-107.54]  | 52.36 [26.02-109.38] | 0.06 [0.06 to 0.07]    |
| Nigeria                  | Both | 242.52 [120.15-511.65] | 520.75 [258.2-1091.99]   | 114.72 | 53.73 [26.61-112.09]  | 55.05 [27.36-115.11] | 0.1 [0.07 to 0.13]     |
| North Macedonia          | Both | 5.98 [2.89-12.57]      | 10.05 [4.93-21.35]       | 68.06  | 31.42 [15.36-65.66]   | 31.36 [15.38-66.77]  | 0 [0 to 0]             |
| Northern Mariana Islands | Both | 0.02 [0.01-0.03]       | 0.05 [0.02-0.1]          | 150    | 8.41 [4.04-17.45]     | 8.79 [4.2-18.6]      | 0.15 [0.13 to 0.17]    |
| Norway                   | Both | 74.64 [37.41-155.65]   | 105.16 [52.8-218.55]     | 40.89  | 122.01 [61.19-252.8]  | 119.7 [59.91-249.15] | 0.13 [0.03 to 0.23]    |
| Oman                     | Both | 2 [0.97-4.23]          | 5.74 [2.77-12.1]         | 187    | 28.11 [14.04-58.8]    | 27.28 [13.2-57.78]   | -0.14 [-0.16 to -0.11] |
| Pakistan                 | Both | 146.58 [71.91-309.05]  | 295.74 [143.63-625.43]   | 101.76 | 25.68 [12.59-54.13]   | 26.2 [12.8-55.13]    | 0.07 [0.07 to 0.07]    |
| Palestine                | Both | 2.63 [1.29-5.63]       | 7.43 [3.56-15.7]         | 182.51 | 30.11 [14.72-63.88]   | 29.26 [14.33-61.86]  | -0.11 [-0.12 to -0.09] |
| Panama                   | Both | 4.07 [1.98-8.48]       | 11.36 [5.53-23.89]       | 179.12 | 27.1 [13.17-56.66]    | 27.25 [13.24-57.43]  | 0.02 [0.02 to 0.02]    |
| Papua New Guinea         | Both | 1.6 [0.75-3.34]        | 4.15 [1.94-8.77]         | 159.38 | 8.73 [4.2-18.22]      | 8.64 [4.2-17.89]     | -0.03 [-0.04 to -0.03] |
| Paraguay                 | Both | 5.4 [2.64-11.44]       | 13.6 [6.67-28.14]        | 151.85 | 24.21 [11.95-50.99]   | 24.16 [11.91-49.9]   | -0.01 [-0.01 to -0.01] |
| Peru                     | Both | 31.31 [15.25-65.88]    | 84.11 [41.78-174.9]      | 168.64 | 25.91 [12.83-54.45]   | 26.06 [12.95-54.36]  | 0.22 [0.09 to 0.34]    |
| Philippines              | Both | 13.28 [5.99-28.31]     | 35.62 [16.19-75.45]      | 168.22 | 4.52 [2.09-9.37]      | 4.64 [2.15-9.51]     | 0.11 [0.1 to 0.11]     |
| Poland                   | Both | 146.77 [73.2-306.84]   | 227.98 [113.79-477.52]   | 55.33  | 33.97 [16.97-71.14]   | 34.13 [16.93-71.64]  | 0.02 [0.01 to 0.02]    |
| Portugal                 | Both | 126.84 [62.98-265.35]  | 195.5 [97.28-409.13]     | 54.13  | 93.12 [46.07-194.14]  | 92.43 [45.55-191.6]  | 0.17 [0.1 to 0.23]     |
| Puerto Rico              | Both | 8.79 [4.3-18.35]       | 16.15 [7.95-33.53]       | 83.73  | 24.5 [11.98-51.19]    | 24.56 [11.98-51.54]  | 0.01 [0 to 0.01]       |
| Qatar                    | Both | 0.39 [0.19-0.82]       | 3.43 [1.62-7.07]         | 779.49 | 25.73 [12.6-53.71]    | 22.78 [11.21-47.38]  | -0.45 [-0.46 to -0.43] |
| Republic of Korea        | Both | 451.52 [229.29-934.61] | 1228.65 [612.73-2565.18] | 172.11 | 143.48 [72.48-293.95] | 135.2 [68.07-281.23] | 0.44 [0.21 to 0.66]    |
| Republic of Moldova      | Both | 31.61 [15.68-66.67]    | 40.56 [20.11-84.75]      | 28.31  | 71.01 [35.15-148.23]  | 70.96 [35.12-147.66] | -0.01 [-0.01 to 0]     |
| Romania                  | Both | 88.75 [42.97-186.69]   | 111.58 [55.05-238.17]    | 25.72  | 31.59 [15.42-67.15]   | 31.75 [15.54-67.4]   | 0.02 [0.02 to 0.03]    |

|                                  |      |                           |                           |        |                       |                       |                        |
|----------------------------------|------|---------------------------|---------------------------|--------|-----------------------|-----------------------|------------------------|
| Russian Federation               | Both | 3520.51 [1779.42-7196.48] | 4085.65 [2052.95-8520.28] | 16.05  | 195.22 [98.83-399.42] | 178 [89.5-370.48]     | -1.11 [-1.42 to -0.8]  |
| Rwanda                           | Both | 15.7 [7.76-32.55]         | 34.46 [16.74-72.55]       | 119.49 | 52.85 [26.31-109.76]  | 53.54 [26.15-111.61]  | 0.06 [0.05 to 0.07]    |
| Saint Lucia                      | Both | 0.21 [0.1-0.44]           | 0.53 [0.26-1.08]          | 152.38 | 24.7 [12.19-51.38]    | 24.05 [11.77-49.19]   | -0.09 [-0.09 to -0.08] |
| Saint Vincent and the Grenadines | Both | 0.17 [0.09-0.36]          | 0.32 [0.16-0.67]          | 88.24  | 24.77 [12.22-51.59]   | 23.54 [11.47-48.86]   | -0.17 [-0.18 to -0.17] |
| Samoa                            | Both | 0.08 [0.04-0.16]          | 0.13 [0.06-0.27]          | 62.5   | 8.96 [4.28-18.81]     | 8.86 [4.22-18.46]     | -0.04 [-0.05 to -0.04] |
| Sao Tome and Principe            | Both | 0.34 [0.17-0.71]          | 0.6 [0.29-1.25]           | 76.47  | 52.62 [25.81-109.16]  | 52.24 [25.75-108.66]  | -0.02 [-0.03 to -0.02] |
| Saudi Arabia                     | Both | 46.01 [22.91-93.46]       | 162.07 [81.04-326.56]     | 252.25 | 70.25 [35.42-145.38]  | 69.58 [35.23-144.03]  | -0.71 [-0.98 to -0.44] |
| Senegal                          | Both | 17.29 [8.45-35.93]        | 41.26 [20.27-86.42]       | 138.64 | 51.64 [25.49-107.5]   | 52.23 [25.59-109.1]   | 0.04 [0.03 to 0.04]    |
| Serbia                           | Both | 36.69 [17.86-78.02]       | 47.37 [23.25-101.1]       | 29.11  | 31.55 [15.49-66.6]    | 31.38 [15.26-66.5]    | -0.01 [-0.01 to -0.01] |
| Seychelles                       | Both | 0.02 [0.01-0.05]          | 0.04 [0.02-0.09]          | 100    | 3.91 [1.75-8.18]      | 3.76 [1.73-7.85]      | -0.15 [-0.17 to -0.13] |
| Sierra Leone                     | Both | 9.98 [4.92-20.6]          | 19.64 [9.53-40.57]        | 96.79  | 51.46 [25.5-107.12]   | 51.72 [25.41-107.09]  | 0.02 [0.01 to 0.03]    |
| Singapore                        | Both | 26.44 [13.26-55.04]       | 87.98 [43.87-184.93]      | 232.75 | 113.41 [56.64-235.67] | 108.11 [53.74-226.75] | 0.14 [0.04 to 0.23]    |
| Slovakia                         | Both | 18.61 [9.2-39.57]         | 28.38 [13.89-59.36]       | 52.5   | 31.6 [15.58-66.9]     | 31.63 [15.38-66.77]   | 0 [0 to 0.01]          |
| Slovenia                         | Both | 7.69 [3.76-16.31]         | 12.57 [6.17-26.25]        | 63.46  | 31.53 [15.49-66.62]   | 31.43 [15.42-65.34]   | -0.02 [-0.03 to -0.02] |
| Solomon Islands                  | Both | 0.11 [0.05-0.24]          | 0.27 [0.13-0.56]          | 145.45 | 8.55 [4.07-17.93]     | 8.76 [4.22-18.03]     | 0.08 [0.08 to 0.09]    |
| Somalia                          | Both | 14.64 [7.11-30.37]        | 38.06 [18.67-79.15]       | 159.97 | 52.34 [25.99-109.01]  | 53.43 [26.58-111.58]  | 0.08 [0.07 to 0.09]    |
| South Africa                     | Both | 142.96 [70.83-298.74]     | 309.78 [154.39-643.76]    | 116.69 | 66.72 [33.34-138.51]  | 66.45 [33.21-137.17]  | -0.01 [-0.02 to -0.01] |
| South Sudan                      | Both | 12.22 [5.97-25.12]        | 21.67 [10.49-44.18]       | 77.33  | 49.59 [24.21-101.98]  | 50.3 [24.83-103.29]   | 0.05 [0.04 to 0.06]    |
| Spain                            | Both | 425.82 [212.66-896.15]    | 918.21 [369.86-2242.03]   | 115.63 | 80.83 [40.11-168.71]  | 106.59 [42.69-258.3]  | 1.88 [1.46 to 2.29]    |
| Sri Lanka                        | Both | 3.93 [1.7-8.18]           | 9.73 [4.31-20.95]         | 147.58 | 3.66 [1.61-7.54]      | 3.85 [1.74-8.23]      | 0.18 [0.16 to 0.19]    |
| Sudan                            | Both | 26.84 [13.03-56.77]       | 55.27 [26.89-115.97]      | 105.92 | 28.52 [14.08-60.57]   | 28.05 [13.96-58.8]    | -0.07 [-0.08 to -0.06] |
| Suriname                         | Both | 0.64 [0.31-1.32]          | 1.49 [0.73-3.1]           | 132.81 | 24.2 [11.82-50.01]    | 24.28 [11.8-49.85]    | 0.01 [0.01 to 0.01]    |
| Sweden                           | Both | 65.68 [32.45-137.46]      | 87.37 [42.86-181.4]       | 33.02  | 47.54 [23.29-99.49]   | 46.94 [22.94-97.96]   | -0.26 [-0.67 to 0.15]  |
| Switzerland                      | Both | 82.99 [41.12-173.46]      | 133.01 [66.09-280.32]     | 60.27  | 85.17 [42.08-178.31]  | 84.61 [41.98-176.3]   | -0.03 [-0.03 to -0.03] |
| Syrian Arab Republic             | Both | 15.51 [7.61-33.12]        | 38.22 [18.65-80.45]       | 146.42 | 28.54 [14.06-60.35]   | 28.49 [13.98-60.85]   | 0 [-0.02 to 0.01]      |
| Tajikistan                       | Both | 18.09 [8.81-37.66]        | 34.66 [16.94-72.99]       | 91.6   | 64.27 [31.41-134.27]  | 62.85 [30.67-132.68]  | -0.08 [-0.1 to -0.06]  |
| Thailand                         | Both | 13.28 [5.9-28.31]         | 39.7 [17.57-84.74]        | 198.95 | 3.76 [1.7-7.94]       | 3.84 [1.7-8.17]       | 0.12 [0.1 to 0.14]     |
| Timor-Leste                      | Both | 0.1 [0.05-0.22]           | 0.29 [0.13-0.61]          | 190    | 3.64 [1.65-7.6]       | 3.65 [1.65-7.5]       | 0.06 [0.02 to 0.09]    |
| Togo                             | Both | 6.98 [3.41-14.52]         | 21.45 [10.41-44.45]       | 207.31 | 52.48 [25.9-109.68]   | 53.63 [26.56-112.04]  | 0.08 [0.07 to 0.09]    |
| Tonga                            | Both | 0.05 [0.02-0.1]           | 0.07 [0.03-0.15]          | 40     | 9.01 [4.28-18.54]     | 9.03 [4.37-18.99]     | 0.01 [0.01 to 0.02]    |

|                              |      |                            |                            |        |                       |                       |                        |
|------------------------------|------|----------------------------|----------------------------|--------|-----------------------|-----------------------|------------------------|
| Trinidad and Tobago          | Both | 2.02 [0.98-4.15]           | 4.49 [2.23-9.27]           | 122.28 | 24.26 [11.83-49.45]   | 24.03 [11.99-49.36]   | -0.02 [-0.03 to -0.02] |
| Tunisia                      | Both | 14.85 [7.19-31.42]         | 38 [18.58-81.41]           | 155.89 | 28.92 [14-61.11]      | 29.34 [14.46-62.68]   | 0.05 [0.04 to 0.06]    |
| Turkey                       | Both | 29.29 [13.97-61.66]        | 72.72 [34.39-156.02]       | 148.28 | 8.14 [3.89-17.21]     | 8.15 [3.88-17.3]      | -0.13 [-0.29 to 0.04]  |
| Turkmenistan                 | Both | 8.67 [4.23-18.05]          | 20.08 [9.8-42.5]           | 131.6  | 45.09 [22.19-94.11]   | 49.05 [24.19-102.49]  | 0.33 [0.23 to 0.42]    |
| Uganda                       | Both | 34.78 [17.03-72.36]        | 80.25 [38.96-166.34]       | 130.74 | 51.72 [25.63-107.46]  | 53.14 [25.79-110.09]  | 0.1 [0.09 to 0.11]     |
| Ukraine                      | Both | 409.21 [198.68-863.45]     | 431.09 [213.58-907.19]     | 5.35   | 57.7 [28.15-122.06]   | 57.95 [28.58-121.6]   | 0.28 [0.11 to 0.44]    |
| United Arab Emirates         | Both | 1.45 [0.7-2.98]            | 14.48 [6.74-29.51]         | 898.62 | 25.8 [12.65-54.58]    | 23.57 [11.55-48.82]   | -0.32 [-0.34 to -0.3]  |
| United Kingdom               | Both | 662.83 [326.59-1388.88]    | 925.13 [457.84-1923.4]     | 39.57  | 78.54 [38.47-164.91]  | 81.32 [40.18-170.64]  | -0.03 [-0.38 to 0.32]  |
| United Republic of Tanzania  | Both | 58.74 [28.5-120.95]        | 137.48 [66.82-282.15]      | 134.05 | 51.9 [25.33-106.31]   | 52.3 [25.62-108.12]   | 0.03 [0.02 to 0.03]    |
| United States of America     | Both | 4868.46 [2494.56-10176.54] | 9300.81 [4667.04-19649.24] | 91.04  | 163.53 [83.73-342.46] | 176.31 [89.12-366.47] | 0.27 [0.03 to 0.52]    |
| United States Virgin Islands | Both | 0.22 [0.11-0.46]           | 0.44 [0.22-0.92]           | 100    | 24.66 [12.12-51.52]   | 24.72 [11.98-50.98]   | 0 [0 to 0.01]          |
| Uruguay                      | Both | 39.94 [19.57-83.72]        | 52.71 [26.01-110.46]       | 31.97  | 105.55 [51.95-220.29] | 105.68 [52.12-223.91] | 0.01 [0.01 to 0.02]    |
| Uzbekistan                   | Both | 73.71 [36.18-154.56]       | 146.61 [72.6-307.34]       | 98.9   | 65.17 [31.79-136.78]  | 64.17 [31.44-134.29]  | -0.04 [-0.05 to -0.04] |
| Vanuatu                      | Both | 0.06 [0.03-0.12]           | 0.15 [0.07-0.31]           | 150    | 8.57 [4.12-17.84]     | 8.69 [4.17-18.22]     | 0.07 [0.05 to 0.08]    |
| Venezuela                    | Both | 10.87 [5.21-23.61]         | 33.42 [15.96-71.69]        | 207.45 | 11.27 [5.41-24.4]     | 11.32 [5.44-24.07]    | -0.02 [-0.04 to 0]     |
| (Bolivarian Republic of)     |      |                            |                            |        |                       |                       |                        |
| VietNam                      | Both | 15.54 [6.89-32.29]         | 36.84 [16.73-76.75]        | 137.07 | 4 [1.79-8.33]         | 3.96 [1.83-8.18]      | -0.04 [-0.04 to -0.03] |
| Yemen                        | Both | 14.76 [7.19-31.4]          | 40.54 [19.72-85.46]        | 174.66 | 29.55 [14.29-61.83]   | 29.12 [14.03-61.72]   | -0.04 [-0.05 to -0.02] |
| Zambia                       | Both | 15.55 [7.59-31.81]         | 37.79 [18.36-78.63]        | 143.02 | 51.13 [25.05-105.41]  | 52.13 [25.93-109.08]  | 0.09 [0.08 to 0.1]     |
| Zimbabwe                     | Both | 27.64 [13.64-57.13]        | 48.62 [24.2-101.6]         | 75.9   | 63.83 [31.25-130.67]  | 64.33 [32.01-132.59]  | 0.04 [0.04 to 0.04]    |
| Afghanistan                  | Male | 6.59 [3.22-14.02]          | 11.87 [5.63-24.32]         | 80.12  | 17.58 [8.62-37.16]    | 17.37 [8.43-36.42]    | -0.03 [-0.04 to -0.03] |
| Albania                      | Male | 3.04 [1.48-6.46]           | 5.82 [2.88-12.46]          | 91.45  | 28.8 [14.13-61.44]    | 28.94 [14.15-61.48]   | 0.02 [0.02 to 0.03]    |
| Algeria                      | Male | 11.01 [5.33-23.28]         | 32.05 [15.41-67.11]        | 191.1  | 17.89 [8.66-37.3]     | 17.85 [8.65-37.31]    | -0.01 [-0.01 to 0]     |
| American Samoa               | Male | 0.01 [0-0.02]              | 0.01 [0.01-0.03]           | 0      | 6.09 [2.79-12.63]     | 6.06 [2.77-12.52]     | -0.01 [-0.02 to 0]     |
| Andorra                      | Male | 0.52 [0.26-1.1]            | 1.27 [0.63-2.67]           | 144.23 | 176.2 [88.63-371.92]  | 176.07 [88.18-371.89] | 1.18 [0.79 to 1.57]    |
| Angola                       | Male | 8.72 [4.31-17.87]          | 23.43 [11.5-48.39]         | 168.69 | 40.46 [19.86-83.09]   | 40.53 [19.88-82.98]   | 0.01 [0 to 0.01]       |
| Antigua and Barbuda          | Male | 0.04 [0.02-0.07]           | 0.08 [0.04-0.17]           | 100    | 15.88 [7.68-33.41]    | 15.81 [7.55-33.04]    | -0.02 [-0.02 to -0.01] |
| Argentina                    | Male | 73.62 [35.53-157.14]       | 119.33 [57.96-254.48]      | 62.09  | 50.52 [24.47-107.75]  | 50.51 [24.5-107.54]   | 0 [0 to 0]             |
| Armenia                      | Male | 4.91 [2.39-10.33]          | 7.21 [3.5-15.21]           | 46.84  | 40.05 [19.7-83.48]    | 40.3 [19.7-84.5]      | 0.02 [0.02 to 0.03]    |

|                                 |      |                      |                           |        |                       |                       |                        |
|---------------------------------|------|----------------------|---------------------------|--------|-----------------------|-----------------------|------------------------|
| Australia                       | Male | 44.3 [21.65-94.08]   | 91.97 [44.92-193.44]      | 107.61 | 49.93 [24.44-105.85]  | 49.93 [24.2-104.95]   | 0 [-0.01 to 0]         |
| Austria                         | Male | 70.94 [35.62-148.54] | 115.91 [57.75-248.42]     | 63.39  | 156.72 [78.56-327.29] | 157.07 [78.73-331.61] | 1.15 [0.78 to 1.53]    |
| Azerbaijan                      | Male | 7.69 [3.77-16.14]    | 16.37 [8.03-34.69]        | 112.87 | 35.57 [17.45-74.75]   | 35.45 [17.53-75.16]   | 0.35 [0.12 to 0.59]    |
| Bahamas                         | Male | 0.11 [0.05-0.24]     | 0.29 [0.14-0.63]          | 163.64 | 15.9 [7.59-33.49]     | 15.85 [7.68-33.62]    | -0.02 [-0.02 to -0.01] |
| Bahrain                         | Male | 0.22 [0.1-0.47]      | 1.56 [0.74-3.27]          | 609.09 | 17.73 [8.6-37.55]     | 17.6 [8.66-36.95]     | -0.03 [-0.04 to -0.02] |
| Bangladesh                      | Male | 43.16 [20.94-92.12]  | 113.73 [54.96-243.67]     | 163.51 | 16.67 [8.27-35.15]    | 16.73 [8.15-35.75]    | 0.02 [0.02 to 0.03]    |
| Barbados                        | Male | 0.18 [0.09-0.38]     | 0.35 [0.17-0.72]          | 94.44  | 15.96 [7.6-33.79]     | 15.87 [7.48-33.1]     | -0.02 [-0.02 to -0.01] |
| Belarus                         | Male | 23.82 [11.71-50.28]  | 29.44 [14.49-62.17]       | 23.59  | 47.77 [23.59-99.57]   | 47.92 [23.59-100.14]  | 0.01 [0 to 0.02]       |
| Belgium                         | Male | 75.3 [37.43-156.31]  | 110.37 [54.86-228.56]     | 46.57  | 117.32 [58.46-243.85] | 117.18 [58.44-244.81] | 0.72 [0.48 to 0.96]    |
| Belize                          | Male | 0.07 [0.04-0.16]     | 0.23 [0.11-0.48]          | 228.57 | 15.96 [7.49-33.79]    | 15.86 [7.63-33.01]    | -0.01 [-0.02 to -0.01] |
| Benin                           | Male | 3.95 [1.93-8.1]      | 10.26 [5.03-20.79]        | 159.75 | 40.58 [19.94-83.73]   | 40.86 [20.15-83.08]   | 0.02 [0.02 to 0.02]    |
| Bermuda                         | Male | 0.04 [0.02-0.1]      | 0.09 [0.04-0.19]          | 125    | 15.94 [7.71-33.97]    | 15.85 [7.64-33.36]    | -0.01 [-0.02 to -0.01] |
| Bhutan                          | Male | 0.21 [0.1-0.45]      | 0.49 [0.23-1.05]          | 133.33 | 16.73 [8.14-34.83]    | 16.69 [7.98-34.82]    | 0 [0 to 0.01]          |
| Bolivia(Plurinational State of) | Male | 2.96 [1.42-6.23]     | 8.35 [4.01-17.23]         | 182.09 | 19.19 [9.25-39.78]    | 19.23 [9.3-39.55]     | 0.01 [0.01 to 0.02]    |
| Bosnia and Herzegovina          | Male | 5.47 [2.66-11.35]    | 7.54 [3.7-15.82]          | 37.84  | 28.72 [13.88-59.41]   | 28.61 [14.08-59.62]   | -0.02 [-0.03 to -0.02] |
| Botswana                        | Male | 1.52 [0.75-3.18]     | 3.83 [1.89-7.97]          | 151.97 | 54.81 [27.04-115.23]  | 54.26 [26.6-113.18]   | -0.02 [-0.03 to -0.02] |
| Brazil                          | Male | 73.12 [35.35-151.32] | 188.65 [90.94-388.45]     | 158    | 17.2 [8.35-34.97]     | 17.32 [8.37-35.45]    | 0.01 [0.01 to 0.02]    |
| Brunei Darussalam               | Male | 0.15 [0.07-0.32]     | 0.47 [0.23-0.98]          | 213.33 | 29.42 [14.46-61.06]   | 29.5 [14.68-61.24]    | 0.02 [0.01 to 0.02]    |
| Bulgaria                        | Male | 16.49 [8.16-34.22]   | 16.98 [8.34-35.52]        | 2.97   | 28.65 [14.12-59.17]   | 28.77 [14.26-59.83]   | 0.01 [0.01 to 0.01]    |
| Burkina Faso                    | Male | 8.73 [4.26-17.73]    | 18.47 [8.92-37.53]        | 111.57 | 40.45 [19.85-82.09]   | 40.85 [19.89-82.92]   | 0.04 [0.03 to 0.04]    |
| Burundi                         | Male | 4.43 [2.19-9.04]     | 10.68 [5.23-21.82]        | 141.08 | 40.54 [19.86-83.07]   | 40.43 [19.74-82.93]   | 0 [-0.01 to 0]         |
| Cabo Verde                      | Male | 0.37 [0.18-0.77]     | 0.83 [0.41-1.72]          | 124.32 | 41.05 [20.13-83.83]   | 40.92 [20.01-84.16]   | -0.01 [-0.02 to -0.01] |
| Cambodia                        | Male | 0.37 [0.16-0.83]     | 0.99 [0.41-2.18]          | 167.57 | 1.97 [0.84-4.37]      | 1.98 [0.83-4.2]       | 0.01 [0 to 0.01]       |
| Cameroon                        | Male | 9.46 [4.62-19.39]    | 25.98 [12.86-52.4]        | 174.63 | 40.44 [19.89-83.37]   | 40.59 [19.96-83.31]   | 0.02 [0.01 to 0.03]    |
| Canada                          | Male | 148.8 [73.02-310.85] | 310.34 [154.73-649.01]    | 108.56 | 102.66 [50.44-213.99] | 102.59 [51.25-214.68] | 0 [-0.01 to 0]         |
| Central African Republic        | Male | 2.34 [1.16-4.78]     | 4.58 [2.25-9.41]          | 95.73  | 40.1 [19.63-81.88]    | 40.25 [19.81-82.55]   | 0.02 [0.01 to 0.02]    |
| Chad                            | Male | 5.58 [2.73-11.56]    | 13.1 [6.42-27.03]         | 134.77 | 40.7 [20.01-84.69]    | 40.64 [20.14-84.09]   | 0 [-0.01 to 0]         |
| Chile                           | Male | 23.28 [11.26-49.35]  | 55.44 [26.95-116.05]      | 138.14 | 50.41 [24.37-106.5]   | 50.31 [24.44-105.65]  | 0 [-0.01 to 0]         |
| China                           | Male | 1062 [517.1-2258.51] | 2995.58 [1446.69-6308.99] | 182.07 | 25.56 [12.64-53.7]    | 29.95 [14.62-63.73]   | -0.93 [-1.57 to -0.28] |
| Colombia                        | Male | 18.26 [8.89-38.43]   | 50.77 [24.87-106.22]      | 178.04 | 20.78 [10.13-43.17]   | 20.89 [10.19-43.67]   | 0.02 [0.02 to 0.03]    |



|                                       |      |                       |                        |        |                       |                      |                        |
|---------------------------------------|------|-----------------------|------------------------|--------|-----------------------|----------------------|------------------------|
| Comoros                               | Male | 0.45 [0.22-0.93]      | 0.97 [0.48-1.96]       | 115.56 | 40.61 [19.8-83.34]    | 40.74 [19.94-82.65]  | 0.01 [0.01 to 0.02]    |
| Congo                                 | Male | 2.03 [1-4.14]         | 5.97 [2.92-12.09]      | 194.09 | 40.45 [19.97-82.99]   | 40.67 [19.86-83.45]  | 0.02 [0.02 to 0.02]    |
| Costa Rica                            | Male | 1.79 [0.86-3.67]      | 5.02 [2.46-10.66]      | 180.45 | 20.86 [10.12-43.05]   | 20.8 [10.25-43.97]   | -0.01 [-0.02 to -0.01] |
| Cote d'Ivoire                         | Male | 9.83 [4.8-20.2]       | 25.98 [12.63-53.63]    | 164.29 | 40.3 [19.7-82.9]      | 40.67 [19.91-83.52]  | 0.02 [0.02 to 0.03]    |
| Croatia                               | Male | 8.79 [4.17-18.35]     | 10.18 [5.11-21.46]     | 15.81  | 32.14 [15.35-67.02]   | 28.57 [14.2-59.75]   | -0.45 [-0.58 to -0.32] |
| Cuba                                  | Male | 7.96 [3.75-16.74]     | 13.98 [6.73-29.98]     | 75.63  | 15.87 [7.51-33.38]    | 15.78 [7.52-33.65]   | -0.02 [-0.02 to -0.01] |
| Cyprus                                | Male | 5.29 [2.63-11.2]      | 12.34 [6.15-26.05]     | 133.27 | 137.07 [68.15-289.71] | 136.99 [68.54-289.4] | 0.85 [0.57 to 1.13]    |
| Czechia                               | Male | 16.21 [7.96-34.09]    | 24.95 [12.25-52.67]    | 53.92  | 28.49 [14.03-59.96]   | 28.41 [13.98-59.8]   | -0.02 [-0.02 to -0.01] |
| Democratic People's Republic of Korea | Male | 17.25 [8.3-35.91]     | 36.76 [17.96-77.92]    | 113.1  | 27.15 [13.41-56.6]    | 27.17 [13.29-56.78]  | 0 [0 to 0]             |
| Democratic Republic of the Congo      | Male | 31.48 [15.31-64.36]   | 74.47 [36.76-152.79]   | 136.56 | 40.22 [19.79-81.99]   | 40.41 [19.98-84.62]  | 0.03 [0.02 to 0.03]    |
| Denmark                               | Male | 37.35 [18.24-77.5]    | 48.27 [23.48-102.29]   | 29.24  | 111.57 [54.63-231.31] | 98.22 [47.87-207.43] | 0.29 [0.08 to 0.5]     |
| Djibouti                              | Male | 0.35 [0.17-0.7]       | 1.55 [0.75-3.17]       | 342.86 | 40.87 [19.89-83.89]   | 40.83 [19.85-82.97]  | 0 [-0.01 to 0]         |
| Dominica                              | Male | 0.04 [0.02-0.09]      | 0.07 [0.03-0.15]       | 75     | 15.87 [7.64-33.07]    | 15.7 [7.52-32.99]    | -0.04 [-0.04 to -0.03] |
| Dominican Republic                    | Male | 2.96 [1.42-6.34]      | 7.24 [3.44-15.33]      | 144.59 | 15.89 [7.61-34.11]    | 15.87 [7.55-33.47]   | -0.01 [-0.01 to 0]     |
| Ecuador                               | Male | 6.15 [2.96-13.03]     | 18.46 [9.01-37.7]      | 200.16 | 22.94 [11.12-48.84]   | 25 [12.18-51.27]     | 0.42 [0.33 to 0.52]    |
| Egypt                                 | Male | 27.63 [13.23-58.17]   | 65.16 [31.44-136.35]   | 135.83 | 17.99 [8.74-38.03]    | 17.86 [8.7-37.42]    | 0 [-0.01 to 0]         |
| El Salvador                           | Male | 2.87 [1.4-6.09]       | 5.12 [2.52-10.51]      | 78.4   | 20.75 [10.13-43.76]   | 20.65 [10.14-42.55]  | -0.02 [-0.03 to -0.02] |
| Equatorial Guinea                     | Male | 0.37 [0.18-0.77]      | 0.93 [0.45-1.92]       | 151.35 | 40.08 [19.65-81.83]   | 40.52 [19.94-83.36]  | 0.04 [0.04 to 0.05]    |
| Eritrea                               | Male | 1.96 [0.96-4.01]      | 5.47 [2.69-11.14]      | 179.08 | 40.33 [19.83-82.86]   | 40.21 [20.01-81.12]  | 0 [-0.01 to 0]         |
| Estonia                               | Male | 3.68 [1.82-7.68]      | 4.52 [2.22-9.44]       | 22.83  | 47.53 [23.62-98.37]   | 48.02 [23.6-99.57]   | 0.04 [0.04 to 0.05]    |
| Eswatini                              | Male | 0.81 [0.4-1.69]       | 1.44 [0.73-3.01]       | 77.78  | 54.86 [27.26-115.09]  | 54 [27.22-114.24]    | -0.06 [-0.07 to -0.05] |
| Ethiopia                              | Male | 46.7 [23.07-96.65]    | 96.86 [47.68-200.42]   | 107.41 | 42.66 [21.2-88.54]    | 43.01 [21.24-90.49]  | 0.04 [0.03 to 0.04]    |
| Fiji                                  | Male | 0.11 [0.05-0.23]      | 0.21 [0.1-0.46]        | 90.91  | 6.09 [2.77-12.61]     | 6.04 [2.77-12.79]    | -0.03 [-0.04 to -0.02] |
| Finland                               | Male | 7.03 [3.5-14.92]      | 12.48 [6.19-26.24]     | 77.52  | 24.76 [12.31-52.38]   | 24.86 [12.21-52.76]  | 0.01 [0 to 0.02]       |
| France                                | Male | 191.06 [94.17-398.59] | 306.61 [152.61-644.78] | 60.48  | 56.22 [27.68-117.2]   | 56.35 [28.15-118.24] | 0.06 [0.04 to 0.08]    |
| Gabon                                 | Male | 1.05 [0.52-2.17]      | 2.21 [1.08-4.57]       | 110.48 | 40.54 [20.39-84.15]   | 40.51 [19.95-83]     | 0 [-0.01 to 0]         |
| Gambia                                | Male | 0.84 [0.41-1.71]      | 2.04 [1-4.2]           | 142.86 | 40.9 [20.24-84.16]    | 40.91 [20.31-83.6]   | -0.01 [-0.01 to -0.01] |
| Germany                               | Male | 137.73 [69.15-288.58] | 219.97 [107.94-461.95] | 59.71  | 27.9 [13.9-58.16]     | 27.85 [13.69-58.78]  | -0.01 [-0.01 to 0]     |

|                                  |      |                        |                          |        |                       |                       |                        |
|----------------------------------|------|------------------------|--------------------------|--------|-----------------------|-----------------------|------------------------|
| Ghana                            | Male | 13.38 [6.54-27.88]     | 32.09 [15.67-65.97]      | 139.84 | 40.8 [20.01-84.02]    | 40.83 [20.16-84.15]   | 0 [0 to 0]             |
| Greece                           | Male | 13.78 [6.71-29.5]      | 19.36 [9.53-40.69]       | 40.49  | 19.94 [9.77-42.91]    | 19.91 [9.78-42.05]    | 1.31 [0.77 to 1.86]    |
| Greenland                        | Male | 0.2 [0.1-0.41]         | 0.41 [0.2-0.86]          | 105    | 100.81 [50.06-210.87] | 101.47 [50.42-210.61] | 0.03 [0.02 to 0.03]    |
| Grenada                          | Male | 0.05 [0.02-0.1]        | 0.09 [0.04-0.19]         | 80     | 15.84 [7.57-33.02]    | 15.72 [7.59-33.05]    | -0.03 [-0.03 to -0.02] |
| Guam                             | Male | 0.02 [0.01-0.05]       | 0.06 [0.03-0.12]         | 200    | 6.19 [2.82-12.92]     | 6.17 [2.88-12.72]     | -0.01 [-0.02 to 0]     |
| Guatemala                        | Male | 3.9 [1.89-8.19]        | 10.33 [5.1-21.47]        | 164.87 | 20.72 [10.09-43.1]    | 20.63 [10.21-43.14]   | -0.02 [-0.02 to -0.01] |
| Guinea                           | Male | 6.89 [3.38-14]         | 11.77 [5.67-24.41]       | 70.83  | 40.8 [20.2-83.19]     | 40.81 [20.04-85.09]   | 0 [0 to 0]             |
| Guinea-Bissau                    | Male | 0.82 [0.4-1.7]         | 1.48 [0.72-3.02]         | 80.49  | 40.52 [19.88-83.26]   | 40.76 [19.92-83.23]   | 0.02 [0.01 to 0.02]    |
| Guyana                           | Male | 0.29 [0.14-0.62]       | 0.48 [0.23-1.01]         | 65.52  | 15.65 [7.51-33.41]    | 15.58 [7.37-32.89]    | -0.01 [-0.01 to 0]     |
| Haiti                            | Male | 2.53 [1.21-5.44]       | 5.34 [2.52-11.25]        | 111.07 | 15.73 [7.63-33.59]    | 15.71 [7.5-32.99]     | -0.01 [-0.01 to 0]     |
| Honduras                         | Male | 2.14 [1.04-4.51]       | 6.06 [2.95-12.57]        | 183.18 | 20.81 [10.22-43.47]   | 20.77 [10.08-43.15]   | -0.01 [-0.01 to 0]     |
| Hungary                          | Male | 17.36 [8.51-36.66]     | 21.57 [10.54-45.66]      | 24.25  | 28.47 [13.99-59.39]   | 28.59 [14.06-61.01]   | 0.03 [0.02 to 0.03]    |
| Iceland                          | Male | 2.18 [1.1-4.53]        | 4.05 [1.98-8.52]         | 85.78  | 171.06 [85.66-355.24] | 160.01 [78.32-335.5]  | -0.26 [-1.38 to 0.88]  |
| India                            | Male | 430.52 [207.21-903.67] | 1014.07 [488.97-2113.32] | 135.55 | 17.92 [8.78-37.19]    | 18.01 [8.81-37.14]    | 0.02 [0.02 to 0.02]    |
| Indonesia                        | Male | 12.15 [5.06-26.66]     | 27.42 [11.39-59.78]      | 125.68 | 2.58 [1.12-5.64]      | 2.59 [1.11-5.58]      | 0.01 [0.01 to 0.02]    |
| Iran (Islamic Republic of)       | Male | 33.35 [16.12-71.15]    | 91.08 [44.08-191.41]     | 173.1  | 23.16 [11.32-48.45]   | 23.66 [11.5-49.32]    | 0.04 [-0.06 to 0.13]   |
| Iraq                             | Male | 6.94 [3.4-14.62]       | 21.77 [10.58-45.14]      | 213.69 | 17.56 [8.57-37.35]    | 17.68 [8.72-36.08]    | 0.02 [0.01 to 0.03]    |
| Ireland                          | Male | 12.4 [6.19-26.32]      | 23.47 [11.64-49.57]      | 89.27  | 68.24 [34.07-144.91]  | 68.1 [33.97-143.32]   | 0 [0 to 0]             |
| Israel                           | Male | 22.08 [10.9-46.18]     | 52.27 [25.54-110.07]     | 136.73 | 102.53 [50.75-215.34] | 102.37 [50.15-214.7]  | -0.67 [-0.97 to -0.36] |
| Italy                            | Male | 202.97 [99.9-426.89]   | 292.73 [143.06-614.72]   | 44.22  | 54.07 [26.46-114.96]  | 51.38 [25.27-109.94]  | 0.13 [-0.16 to 0.42]   |
| Jamaica                          | Male | 1.28 [0.61-2.72]       | 2.28 [1.1-4.72]          | 78.12  | 15.98 [7.57-34.16]    | 15.8 [7.55-32.62]     | -0.03 [-0.04 to -0.03] |
| Japan                            | Male | 222.22 [107.85-474.19] | 411.14 [203.39-868.5]    | 85.01  | 29.37 [14.31-62.08]   | 29.52 [14.4-62.16]    | -0.09 [-0.14 to -0.05] |
| Jordan                           | Male | 1.34 [0.65-2.82]       | 6.99 [3.37-14.51]        | 421.64 | 17.87 [8.83-37.84]    | 17.86 [8.79-37.54]    | 0 [-0.01 to 0]         |
| Kazakhstan                       | Male | 20.42 [9.99-42.95]     | 30.42 [14.91-63.28]      | 48.97  | 40.13 [19.63-83.95]   | 40.11 [19.77-84.24]   | -0.01 [-0.01 to 0]     |
| Kenya                            | Male | 18.08 [8.8-37.33]      | 49.79 [24.32-103.56]     | 175.39 | 42.7 [21.18-89.11]    | 42.77 [21.24-89.51]   | 0.02 [0.01 to 0.03]    |
| Kuwait                           | Male | 0.84 [0.39-1.76]       | 3.41 [1.6-7.21]          | 305.95 | 17.88 [8.72-37.88]    | 17.78 [8.56-37.42]    | -0.01 [-0.02 to -0.01] |
| Kyrgyzstan                       | Male | 4.99 [2.41-10.53]      | 8.69 [4.24-18.2]         | 74.15  | 40.27 [19.66-84.91]   | 40.58 [19.83-85.45]   | 0.02 [0.02 to 0.03]    |
| Lao People's Democratic Republic | Male | 0.19 [0.08-0.4]        | 0.42 [0.17-0.93]         | 121.05 | 1.98 [0.86-4.2]       | 1.98 [0.83-4.38]      | 0 [-0.01 to 0.01]      |
| Latvia                           | Male | 6.39 [3.09-13.31]      | 6.65 [3.27-13.89]        | 4.07   | 47.32 [23.09-98.64]   | 47.89 [23.34-99.65]   | 0.04 [0.04 to 0.05]    |
| Lebanon                          | Male | 2.08 [1.01-4.47]       | 4.13 [2.03-8.6]          | 98.56  | 17.79 [8.71-37.89]    | 17.7 [8.68-36.76]     | -0.03 [-0.03 to -0.02] |

|                                  |      |                       |                       |        |                      |                      |                        |
|----------------------------------|------|-----------------------|-----------------------|--------|----------------------|----------------------|------------------------|
| Lesotho                          | Male | 2.56 [1.28-5.35]      | 3.16 [1.55-6.58]      | 23.44  | 55.03 [27.28-114.57] | 54.24 [26.87-114.52] | -0.05 [-0.06 to -0.05] |
| Liberia                          | Male | 2.44 [1.21-5.04]      | 4.86 [2.37-9.65]      | 99.18  | 40.35 [20.05-83.58]  | 40.27 [19.71-81.3]   | -0.01 [-0.01 to 0]     |
| Libya                            | Male | 1.88 [0.91-3.91]      | 5.07 [2.46-10.66]     | 169.68 | 17.86 [8.76-36.97]   | 17.72 [8.77-37.54]   | -0.03 [-0.03 to -0.03] |
| Lithuania                        | Male | 4.38 [2.17-9.1]       | 5.09 [2.5-10.62]      | 16.21  | 24.56 [12.24-50.76]  | 24.82 [12.19-51.95]  | 0.25 [0.11 to 0.38]    |
| Luxembourg                       | Male | 1.56 [0.78-3.31]      | 3.13 [1.55-6.61]      | 100.64 | 67.98 [33.87-143.24] | 67.86 [33.82-143.01] | 0 [-0.01 to 0]         |
| Madagascar                       | Male | 10.93 [5.28-22.48]    | 24.62 [11.98-50.84]   | 125.25 | 40.57 [19.77-84.06]  | 40.8 [19.82-82.77]   | 0.02 [0.02 to 0.03]    |
| Malawi                           | Male | 7.81 [3.8-15.96]      | 14.46 [7.12-29.65]    | 85.15  | 40.41 [19.76-83.27]  | 40.51 [20.07-83.56]  | 0.02 [0.01 to 0.03]    |
| Malaysia                         | Male | 0.9 [0.37-1.99]       | 2.66 [1.09-5.75]      | 195.56 | 1.97 [0.84-4.28]     | 1.98 [0.82-4.25]     | 0.02 [0.01 to 0.03]    |
| Maldives                         | Male | 0.01 [0-0.02]         | 0.04 [0.02-0.08]      | 300    | 1.99 [0.83-4.37]     | 2 [0.86-4.34]        | 0.02 [0.01 to 0.03]    |
| Mali                             | Male | 8.78 [4.28-18.32]     | 19.34 [9.45-39.31]    | 120.27 | 40.57 [19.86-84.34]  | 40.9 [19.8-83.25]    | 0.04 [0.03 to 0.04]    |
| Malta                            | Male | 1.31 [0.64-2.78]      | 2.69 [1.34-5.67]      | 105.34 | 68.13 [33.47-143.96] | 68.15 [33.74-145.63] | 0 [0 to 0]             |
| Marshall Islands                 | Male | 0 [0-0.01]            | 0.01 [0-0.02]         | Inf    | 6.12 [2.84-13]       | 6.06 [2.72-12.7]     | -0.03 [-0.03 to -0.02] |
| Mauritania                       | Male | 2.02 [0.99-4.15]      | 4.47 [2.22-9.19]      | 121.29 | 40.94 [20.39-83.91]  | 41.08 [20.36-84.55]  | 0.01 [0.01 to 0.01]    |
| Mauritius                        | Male | 0.07 [0.03-0.14]      | 0.16 [0.07-0.34]      | 128.57 | 1.97 [0.85-4.18]     | 1.96 [0.87-4.26]     | -0.02 [-0.03 to -0.01] |
| Mexico                           | Male | 133.78 [66.27-275.15] | 422.35 [211.03-866.2] | 215.7  | 62.57 [31.06-130.04] | 74.67 [37.21-153.47] | 0.85 [0.67 to 1.02]    |
| Micronesia (Federated States of) | Male | 0.01 [0.01-0.03]      | 0.02 [0.01-0.04]      | 100    | 6.13 [2.85-12.73]    | 6.12 [2.79-12.58]    | 0 [-0.01 to 0]         |
| Mongolia                         | Male | 1.97 [0.95-4.18]      | 4.59 [2.23-9.54]      | 132.99 | 40.26 [19.49-84.26]  | 40.25 [19.89-84.34]  | 0 [-0.01 to 0]         |
| Montenegro                       | Male | 0.81 [0.4-1.71]       | 1.27 [0.62-2.68]      | 56.79  | 28.73 [13.99-60.19]  | 28.77 [14.01-60.1]   | 0 [0 to 0]             |
| Morocco                          | Male | 12.42 [6.04-25.96]    | 29.15 [14.15-61.08]   | 134.7  | 17.89 [8.83-37.45]   | 17.81 [8.8-37.59]    | -0.02 [-0.02 to -0.01] |
| Mozambique                       | Male | 12.39 [6.11-25.68]    | 21.63 [10.51-44.71]   | 74.58  | 40.18 [19.67-82.6]   | 40.14 [19.43-82.83]  | 0 [-0.01 to 0.01]      |
| Myanmar                          | Male | 2.07 [0.86-4.68]      | 4.03 [1.65-9]         | 94.69  | 1.97 [0.84-4.3]      | 1.98 [0.84-4.37]     | 0.02 [0.02 to 0.03]    |
| Namibia                          | Male | 1.89 [0.93-4.01]      | 3.63 [1.77-7.55]      | 92.06  | 54.78 [26.75-115.43] | 54.58 [27.13-113.92] | -0.01 [-0.02 to -0.01] |
| Nepal                            | Male | 8.15 [3.88-17.18]     | 17.79 [8.51-37.34]    | 118.28 | 16.52 [7.98-34.37]   | 16.62 [8.06-34.58]   | 0.03 [0.02 to 0.03]    |
| Netherlands                      | Male | 39.84 [19.97-80.33]   | 72.31 [35.59-154.84]  | 81.5   | 46.97 [23.49-94.88]  | 48.56 [23.84-104.26] | -0.08 [-0.22 to 0.06]  |
| New Zealand                      | Male | 9.22 [4.58-19.3]      | 18.33 [9.05-38.29]    | 98.81  | 52.86 [26.25-110.97] | 53.01 [26.21-110.92] | 0.02 [0.01 to 0.02]    |
| Nicaragua                        | Male | 1.53 [0.74-3.21]      | 4.32 [2.11-9.11]      | 182.35 | 20.79 [10.22-43.48]  | 20.77 [10.26-43.47]  | -0.01 [-0.01 to -0.01] |
| Niger                            | Male | 6.55 [3.21-13.53]     | 16.72 [8.21-34.58]    | 155.27 | 40.84 [20.01-84.55]  | 40.98 [20.11-84.03]  | 0.02 [0.01 to 0.02]    |
| Nigeria                          | Male | 106.28 [51.84-221.48] | 191.59 [93.92-398.22] | 80.27  | 42.85 [21.28-89.94]  | 43.07 [21.37-90.23]  | 0.02 [0.02 to 0.03]    |
| North Macedonia                  | Male | 2.64 [1.28-5.59]      | 4.46 [2.19-9.46]      | 68.94  | 28.81 [14.03-60.68]  | 28.73 [14.26-61.19]  | 0 [0 to 0.01]          |
| Northern Mariana Islands         | Male | 0.01 [0-0.02]         | 0.02 [0.01-0.04]      | 100    | 6.16 [2.8-12.75]     | 6.12 [2.8-12.72]     | -0.01 [-0.02 to -0.01] |

|                                  |      |                          |                          |        |                       |                       |                        |
|----------------------------------|------|--------------------------|--------------------------|--------|-----------------------|-----------------------|------------------------|
| Norway                           | Male | 21.56 [10.7-45.01]       | 33.55 [16.65-69.81]      | 55.61  | 78.62 [39.02-166.05]  | 78.96 [39.43-165.64]  | 0.16 [0.09 to 0.24]    |
| Oman                             | Male | 0.78 [0.37-1.65]         | 2.52 [1.15-5.34]         | 223.08 | 17.73 [8.82-37.51]    | 17.73 [8.59-37.33]    | -0.01 [-0.01 to 0]     |
| Pakistan                         | Male | 56.94 [27.56-119.68]     | 106.61 [51.13-226.52]    | 87.23  | 18.26 [8.86-38.1]     | 18.2 [8.84-37.97]     | -0.01 [-0.01 to 0]     |
| Palestine                        | Male | 0.7 [0.34-1.46]          | 2.27 [1.09-4.81]         | 224.29 | 17.77 [8.7-36.9]      | 17.62 [8.6-37.71]     | -0.03 [-0.04 to -0.03] |
| Panama                           | Male | 1.59 [0.79-3.32]         | 4.24 [2.08-8.87]         | 166.67 | 20.9 [10.31-43.58]    | 20.81 [10.13-43.69]   | -0.01 [-0.02 to -0.01] |
| Papua New Guinea                 | Male | 0.57 [0.26-1.2]          | 1.51 [0.65-3.18]         | 164.91 | 6.08 [2.79-12.57]     | 6.1 [2.82-12.45]      | 0 [0 to 0.01]          |
| Paraguay                         | Male | 1.71 [0.83-3.67]         | 4.32 [2.08-9.07]         | 152.63 | 15.87 [7.62-34.23]    | 15.84 [7.67-33.45]    | -0.01 [-0.01 to 0]     |
| Peru                             | Male | 9.88 [4.76-20.74]        | 25.8 [12.61-54.76]       | 161.13 | 16.6 [8.04-34.73]     | 16.58 [8.09-34.91]    | 0.18 [0.06 to 0.29]    |
| Philippines                      | Male | 3.73 [1.58-8.17]         | 9.5 [3.97-20.86]         | 154.69 | 2.59 [1.14-5.58]      | 2.6 [1.11-5.59]       | 0.02 [0.01 to 0.02]    |
| Poland                           | Male | 55.72 [27.13-117.31]     | 88.68 [43.21-184.16]     | 59.15  | 30.58 [14.92-63.32]   | 30.83 [14.97-63.47]   | 0.03 [0.02 to 0.03]    |
| Portugal                         | Male | 27.79 [13.43-57.43]      | 43.89 [21.46-92.82]      | 57.93  | 46.2 [22.5-95.97]     | 46.41 [22.69-98.77]   | -0.34 [-0.46 to -0.22] |
| Puerto Rico                      | Male | 2.63 [1.26-5.5]          | 4.57 [2.2-9.66]          | 73.76  | 15.83 [7.63-33.12]    | 15.73 [7.53-33.26]    | -0.02 [-0.03 to -0.02] |
| Qatar                            | Male | 0.22 [0.1-0.46]          | 2.11 [0.98-4.43]         | 859.09 | 17.72 [8.66-38.08]    | 17.59 [8.65-36.42]    | -0.03 [-0.04 to -0.02] |
| Republic of Korea                | Male | 44.57 [21.89-95.14]      | 144.72 [71.29-306]       | 224.7  | 33.91 [16.62-71.41]   | 34.17 [16.92-71.77]   | 0.07 [-0.19 to 0.34]   |
| Republic of Moldova              | Male | 8.87 [4.28-18.74]        | 11.46 [5.6-23.83]        | 29.2   | 47.7 [23.23-99.94]    | 48.04 [23.54-99.3]    | 0.02 [0.02 to 0.03]    |
| Romania                          | Male | 36.45 [17.83-77.31]      | 44.2 [21.85-92.84]       | 21.26  | 28.61 [14.06-60.48]   | 28.82 [14.25-59.97]   | 0.03 [0.03 to 0.04]    |
| Russian Federation               | Male | 1082.58 [541.38-2229.66] | 1330.48 [668.14-2776.22] | 22.9   | 157.18 [78.86-324.27] | 145.11 [73.18-301.91] | -1.63 [-2.14 to -1.12] |
| Rwanda                           | Male | 5.44 [2.67-11.2]         | 11.5 [5.61-23.55]        | 111.4  | 40.43 [19.98-83.33]   | 40.51 [19.78-83.78]   | 0.02 [0.01 to 0.03]    |
| Saint Lucia                      | Male | 0.06 [0.03-0.13]         | 0.16 [0.08-0.35]         | 166.67 | 15.79 [7.61-33.51]    | 15.74 [7.5-33.41]     | -0.01 [-0.02 to -0.01] |
| Saint Vincent and the Grenadines | Male | 0.05 [0.02-0.1]          | 0.11 [0.05-0.23]         | 120    | 15.86 [7.68-33.6]     | 15.76 [7.65-32.73]    | -0.02 [-0.02 to -0.02] |
| Samoa                            | Male | 0.03 [0.01-0.05]         | 0.04 [0.02-0.09]         | 33.33  | 6.13 [2.77-12.66]     | 6.13 [2.75-12.78]     | 0 [0 to 0.01]          |
| Sao Tome and Principe            | Male | 0.13 [0.06-0.26]         | 0.23 [0.11-0.47]         | 76.92  | 40.87 [20.08-83.68]   | 40.72 [19.92-83.66]   | -0.01 [-0.01 to -0.01] |
| Saudi Arabia                     | Male | 23.64 [11.53-48.09]      | 84.84 [41.5-171.31]      | 258.88 | 57.88 [28.57-117.35]  | 57.57 [28.75-118.08]  | -0.83 [-1.15 to -0.51] |
| Senegal                          | Male | 6.88 [3.37-14.18]        | 15.63 [7.71-32.47]       | 127.18 | 40.64 [19.98-83.92]   | 40.77 [20.1-84.14]    | 0.01 [0 to 0.01]       |
| Serbia                           | Male | 15.62 [7.6-32.88]        | 19.83 [9.7-41.94]        | 26.95  | 28.75 [13.98-60.32]   | 28.65 [14.05-60.57]   | -0.01 [-0.01 to 0]     |
| Seychelles                       | Male | 0 [0-0.01]               | 0.01 [0-0.02]            | Inf    | 1.98 [0.86-4.35]      | 1.97 [0.85-4.26]      | -0.01 [-0.02 to 0]     |
| Sierra Leone                     | Male | 4.05 [1.98-8.26]         | 7.94 [3.87-16.35]        | 96.05  | 40.6 [20.01-83.51]    | 40.73 [19.79-84.27]   | 0.02 [0.01 to 0.02]    |
| Singapore                        | Male | 3.13 [1.56-6.5]          | 12.09 [5.96-25.67]       | 286.26 | 29.95 [14.84-62.74]   | 30.21 [15.03-63.43]   | 0.04 [0.03 to 0.04]    |
| Slovakia                         | Male | 7.26 [3.54-15.32]        | 11.25 [5.57-23.76]       | 54.96  | 28.56 [14.02-59.89]   | 28.61 [14.2-60.47]    | 0.01 [0 to 0.01]       |
| Slovenia                         | Male | 2.87 [1.41-6.04]         | 5.18 [2.53-10.73]        | 80.49  | 28.37 [13.88-59.96]   | 28.65 [14-58.72]      | 0.02 [0.01 to 0.02]    |

|                              |      |                          |                          |         |                      |                      |                        |
|------------------------------|------|--------------------------|--------------------------|---------|----------------------|----------------------|------------------------|
| Solomon Islands              | Male | 0.04 [0.02-0.09]         | 0.09 [0.04-0.2]          | 125     | 6.17 [2.82-12.54]    | 6.13 [2.82-12.68]    | -0.03 [-0.03 to -0.03] |
| Somalia                      | Male | 5.54 [2.71-11.24]        | 13.29 [6.43-27.18]       | 139.89  | 40.62 [19.82-83.41]  | 40.55 [19.76-83.35]  | -0.01 [-0.01 to -0.01] |
| South Africa                 | Male | 53.81 [26.83-110.92]     | 116.11 [57.6-239.25]     | 115.78  | 56.83 [28.43-116.04] | 56.56 [28.32-115.82] | -0.02 [-0.02 to -0.02] |
| South Sudan                  | Male | 5.62 [2.72-11.48]        | 9.01 [4.35-18.19]        | 60.32   | 40.12 [19.29-81.68]  | 40.08 [19.79-81.97]  | 0 [0 to 0.01]          |
| Spain                        | Male | 116.25 [56.96-241.22]    | 245.72 [103.6-559.37]    | 111.37  | 49.64 [24.31-103.36] | 62.27 [26.18-142.49] | 1.86 [1.42 to 2.3]     |
| Sri Lanka                    | Male | 1.07 [0.43-2.35]         | 2.23 [0.92-5.07]         | 108.41  | 1.97 [0.83-4.26]     | 1.97 [0.82-4.41]     | -0.02 [-0.03 to -0.01] |
| Sudan                        | Male | 8.85 [4.31-18.37]        | 18.88 [9.14-39.12]       | 113.33  | 17.85 [8.75-37.06]   | 17.81 [8.78-36.61]   | -0.01 [-0.01 to 0]     |
| Suriname                     | Male | 0.2 [0.1-0.43]           | 0.45 [0.22-0.97]         | 125     | 15.86 [7.51-33.82]   | 15.72 [7.57-33.28]   | -0.03 [-0.04 to -0.03] |
| Sweden                       | Male | 24.1 [11.86-50.18]       | 34.39 [16.73-71.84]      | 42.7    | 38.95 [18.97-81.46]  | 38.7 [18.89-80.88]   | -0.27 [-0.74 to 0.2]   |
| Switzerland                  | Male | 28.88 [14.35-61.31]      | 50.53 [24.99-107.07]     | 74.97   | 67.57 [33.45-143.82] | 68.17 [33.59-144.12] | 0.03 [0.03 to 0.03]    |
| Syrian Arab Republic         | Male | 5.1 [2.49-10.77]         | 12.07 [5.89-25.44]       | 136.67  | 17.91 [8.87-37.55]   | 17.75 [8.77-37.13]   | -0.02 [-0.03 to -0.01] |
| Tajikistan                   | Male | 5.17 [2.52-10.67]        | 10.83 [5.2-22.59]        | 109.48  | 40.44 [19.94-84.66]  | 40.35 [19.92-84.4]   | 0 [-0.01 to 0]         |
| Thailand                     | Male | 3.32 [1.34-7.51]         | 9.38 [3.94-20.67]        | 182.53  | 1.99 [0.84-4.43]     | 1.99 [0.85-4.3]      | 0.03 [0.02 to 0.05]    |
| Timor-Leste                  | Male | 0.03 [0.01-0.07]         | 0.08 [0.03-0.17]         | 166.67  | 1.98 [0.85-4.33]     | 1.96 [0.84-4.32]     | 0.01 [-0.02 to 0.03]   |
| Togo                         | Male | 2.58 [1.27-5.31]         | 7.48 [3.61-15]           | 189.92  | 40.72 [20.16-84.27]  | 40.84 [19.94-83.51]  | 0.01 [0 to 0.01]       |
| Tonga                        | Male | 0.02 [0.01-0.03]         | 0.02 [0.01-0.05]         | 0       | 6.17 [2.8-12.59]     | 6.15 [2.79-12.89]    | -0.01 [-0.01 to 0]     |
| Trinidad and Tobago          | Male | 0.63 [0.31-1.35]         | 1.42 [0.69-3.04]         | 125.4   | 15.81 [7.73-33.4]    | 15.74 [7.65-33.51]   | -0.02 [-0.02 to -0.01] |
| Tunisia                      | Male | 4.73 [2.29-10]           | 11.28 [5.45-23.55]       | 138.48  | 17.87 [8.63-37.46]   | 17.77 [8.64-36.9]    | -0.03 [-0.03 to -0.02] |
| Turkey                       | Male | 7.49 [3.28-16.07]        | 18.19 [7.93-39.87]       | 142.86  | 4.29 [1.87-9.29]     | 4.28 [1.88-9.4]      | -0.23 [-0.51 to 0.04]  |
| Turkmenistan                 | Male | 3.89 [1.88-8.05]         | 8.64 [4.22-18.69]        | 122.11  | 46.38 [22.66-96.01]  | 46.04 [22.5-98.52]   | -0.03 [-0.04 to -0.02] |
| Uganda                       | Male | 13.4 [6.47-27.29]        | 28.1 [13.71-57.34]       | 109.7   | 40.3 [19.64-81.84]   | 40.5 [19.71-82.11]   | 0.03 [0.02 to 0.03]    |
| Ukraine                      | Male | 91.8 [44.63-190.85]      | 100.74 [49.25-210.74]    | 9.74    | 34.63 [17.13-71.24]  | 35.24 [17.28-73.19]  | 0.32 [0.16 to 0.48]    |
| United Arab Emirates         | Male | 0.81 [0.37-1.7]          | 9.06 [4.18-19.39]        | 1018.52 | 17.74 [8.67-37.59]   | 17.63 [8.61-36.88]   | -0.02 [-0.02 to -0.01] |
| United Kingdom               | Male | 256.86 [124.85-543.19]   | 352.69 [172.61-739.77]   | 37.31   | 69.56 [33.72-147.23] | 65.71 [32.13-138.57] | -0.41 [-0.59 to -0.22] |
| United Republic of Tanzania  | Male | 22.5 [11-46.26]          | 52.09 [25.49-104.64]     | 131.51  | 40.49 [19.82-82.61]  | 40.73 [19.88-83.16]  | 0.03 [0.02 to 0.03]    |
| United States of America     | Male | 1671.27 [840.12-3498.74] | 3031.1 [1524.19-6316.37] | 81.37   | 126.3 [63.21-265.95] | 122.87 [61.52-257.8] | 0.05 [-0.4 to 0.5]     |
| United States Virgin Islands | Male | 0.07 [0.03-0.14]         | 0.13 [0.06-0.27]         | 85.71   | 15.88 [7.56-33.79]   | 15.79 [7.48-33.25]   | -0.03 [-0.03 to -0.03] |
| Uruguay                      | Male | 8.56 [4.12-18.06]        | 10.99 [5.38-23.63]       | 28.39   | 50.57 [24.35-107.38] | 50.42 [24.55-107.97] | 0 [-0.01 to 0]         |
| Uzbekistan                   | Male | 19.98 [9.6-41.5]         | 42.86 [20.46-89.7]       | 114.51  | 40.53 [19.75-84.9]   | 40.37 [19.71-84.49]  | -0.01 [-0.01 to 0]     |
| Vanuatu                      | Male | 0.02 [0.01-0.05]         | 0.05 [0.02-0.11]         | 150     | 6.15 [2.79-12.85]    | 6.13 [2.79-12.77]    | 0 [-0.01 to 0.01]      |

|                                       |        |                        |                        |        |                       |                       |                        |
|---------------------------------------|--------|------------------------|------------------------|--------|-----------------------|-----------------------|------------------------|
| Venezuela<br>(Bolivarian Republic of) | Male   | 3.26 [1.49-7.15]       | 9.8 [4.43-21.25]       | 200.61 | 7.09 [3.28-15.32]     | 7.08 [3.27-15.45]     | -0.08 [-0.12 to -0.04] |
| VietNam                               | Male   | 3.25 [1.32-7.2]        | 8.19 [3.37-18.17]      | 152    | 1.99 [0.82-4.25]      | 1.98 [0.85-4.29]      | -0.01 [-0.02 to 0]     |
| Yemen                                 | Male   | 4.54 [2.2-9.41]        | 12.51 [5.94-26.07]     | 175.55 | 17.83 [8.8-37.29]     | 17.83 [8.66-37.41]    | 0 [0 to 0.01]          |
| Zambia                                | Male   | 6.38 [3.07-13.05]      | 14.71 [7.21-29.89]     | 130.56 | 40.54 [19.56-82.08]   | 40.52 [19.73-82.82]   | 0 [0 to 0.01]          |
| Zimbabwe                              | Male   | 11.89 [5.83-25.24]     | 18.26 [9.09-38.38]     | 53.57  | 55.14 [26.92-116.66]  | 54.74 [27.08-114.84]  | -0.02 [-0.02 to -0.01] |
| Afghanistan                           | Female | 13.96 [6.79-29.5]      | 26.92 [13.32-56.32]    | 92.84  | 39.37 [19.24-82.2]    | 28.79 [14.25-60.53]   | -0.01 [-0.02 to -0.01] |
| Albania                               | Female | 3.65 [1.76-7.78]       | 7.54 [3.71-16.11]      | 106.58 | 34.08 [16.48-72.33]   | 31.66 [15.37-66.95]   | 0.01 [0 to 0.01]       |
| Algeria                               | Female | 25.83 [12.47-53.74]    | 69.5 [33.94-145.91]    | 169.07 | 40.36 [19.66-83.83]   | 28.77 [14.12-60.19]   | -0.01 [-0.01 to -0.01] |
| American Samoa                        | Female | 0.01 [0.01-0.03]       | 0.03 [0.01-0.06]       | 200    | 11.54 [5.47-24.49]    | 8.84 [4.27-18.42]     | -0.04 [-0.04 to -0.03] |
| Andorra                               | Female | 0.27 [0.14-0.56]       | 0.69 [0.34-1.45]       | 155.56 | 100.32 [49.82-207.99] | 139.19 [69.86-293.69] | -0.01 [-0.01 to 0]     |
| Angola                                | Female | 13.06 [6.46-27.29]     | 42.06 [20.72-87.84]    | 222.05 | 62.73 [31.28-129.77]  | 52.94 [26.08-109.49]  | 0.01 [0.01 to 0.02]    |
| Antigua and Barbuda                   | Female | 0.09 [0.05-0.19]       | 0.18 [0.09-0.36]       | 100    | 32.05 [15.71-67.69]   | 24.31 [11.78-49.85]   | -0.02 [-0.02 to -0.02] |
| Argentina                             | Female | 266.09 [132.48-551.56] | 430.45 [215.28-892.48] | 61.77  | 150.85 [75.56-313.54] | 104.86 [52.01-218.47] | 0 [0 to 0]             |
| Armenia                               | Female | 12.96 [6.37-27.41]     | 19.55 [9.68-41.1]      | 50.85  | 82.91 [40.78-174.87]  | 64.49 [31.75-134.35]  | 0 [0 to 0]             |
| Australia                             | Female | 156.11 [77.91-329.54]  | 326.96 [163.84-686.27] | 109.44 | 154.61 [77.44-325.82] | 109.07 [54.94-227.69] | -0.34 [-0.55 to -0.13] |
| Austria                               | Female | 65.4 [32.32-135.85]    | 86.93 [43.08-182.89]   | 32.92  | 99.91 [49.76-207.43]  | 127.1 [63.29-267.09]  | 0.01 [0.01 to 0.01]    |
| Azerbaijan                            | Female | 30.3 [15.03-63.57]     | 56.85 [28.2-119.41]    | 87.62  | 102.6 [50.7-214.48]   | 72.32 [35.63-150.62]  | 0.3 [0.1 to 0.51]      |
| Bahamas                               | Female | 0.28 [0.14-0.58]       | 0.7 [0.34-1.48]        | 150    | 32.03 [15.94-67.42]   | 24.67 [11.96-51.66]   | -0.01 [-0.01 to -0.01] |
| Bahrain                               | Female | 0.34 [0.17-0.72]       | 1.82 [0.88-3.87]       | 435.29 | 39.91 [19.37-83.95]   | 26.26 [12.91-55.22]   | -0.02 [-0.02 to -0.02] |
| Bangladesh                            | Female | 67.81 [32.88-142.34]   | 206.59 [100.75-431.25] | 204.66 | 32.12 [15.78-66.98]   | 24.23 [11.77-49.91]   | 0.02 [0.01 to 0.02]    |
| Barbados                              | Female | 0.5 [0.25-1.04]        | 0.84 [0.42-1.75]       | 68     | 32.08 [15.76-67.45]   | 24.59 [12.09-50.75]   | -0.02 [-0.02 to -0.01] |
| Belarus                               | Female | 70.11 [34.69-149.35]   | 82.69 [41.18-174.47]   | 17.94  | 87.32 [43.48-185.29]  | 71.86 [35.94-149.68]  | 0.02 [0.01 to 0.02]    |
| Belgium                               | Female | 81.39 [40.28-170.53]   | 108.02 [53.4-223.96]   | 32.72  | 99.92 [49.38-207.72]  | 108.04 [53.65-225]    | -0.01 [-0.02 to -0.01] |
| Belize                                | Female | 0.15 [0.07-0.3]        | 0.45 [0.22-0.94]       | 200    | 32.08 [15.88-66.71]   | 23.76 [11.62-48.74]   | -0.02 [-0.02 to -0.02] |
| Benin                                 | Female | 6.61 [3.23-13.74]      | 17.18 [8.42-35.15]     | 159.91 | 62.57 [30.79-131.17]  | 52.64 [25.71-109.36]  | 0.02 [0.01 to 0.02]    |
| Bermuda                               | Female | 0.11 [0.06-0.23]       | 0.22 [0.11-0.46]       | 100    | 32.17 [16-67.53]      | 24.66 [12.1-51.44]    | 0 [0 to 0]             |
| Bhutan                                | Female | 0.4 [0.2-0.84]         | 0.89 [0.44-1.86]       | 122.5  | 32.18 [15.78-66.24]   | 24.3 [11.97-50.79]    | 0.02 [0.02 to 0.02]    |
| Bolivia(Plurinational State of)       | Female | 8.75 [4.27-18.32]      | 23.84 [11.62-48.5]     | 172.46 | 50.63 [24.82-105.76]  | 35.68 [17.43-73.72]   | 0.01 [0.01 to 0.01]    |
| Bosnia and Herzegovina                | Female | 7.9 [3.82-16.97]       | 10.76 [5.28-22.63]     | 36.2   | 33.85 [16.45-72.09]   | 31.43 [15.29-65.52]   | -0.02 [-0.02 to -0.01] |

|                                       |        |                          |                        |        |                       |                       |                        |
|---------------------------------------|--------|--------------------------|------------------------|--------|-----------------------|-----------------------|------------------------|
| Botswana                              | Female | 2.36 [1.17-4.93]         | 5.92 [2.92-12.15]      | 150.85 | 71.56 [35.88-148.71]  | 63.74 [31.7-131.63]   | -0.04 [-0.04 to -0.04] |
| Brazil                                | Female | 162 [78.45-336.34]       | 449.65 [218.43-930.17] | 177.56 | 34.01 [16.58-69.63]   | 26.64 [12.95-54.83]   | 0.02 [0.02 to 0.02]    |
| Brunei Darussalam                     | Female | 0.96 [0.48-2.02]         | 3.34 [1.68-7]          | 247.92 | 183.9 [92.33-380.54]  | 111.05 [55.79-230.76] | 0.02 [0.02 to 0.02]    |
| Bulgaria                              | Female | 22.5 [11.03-47.3]        | 26.05 [12.8-55.28]     | 15.78  | 33.9 [16.55-70.94]    | 31.67 [15.69-66.64]   | -0.01 [-0.01 to 0]     |
| Burkina Faso                          | Female | 14.92 [7.37-30.84]       | 33.56 [16.34-69.23]    | 124.93 | 62.51 [30.65-128.99]  | 53.06 [26.11-109.74]  | 0.03 [0.03 to 0.04]    |
| Burundi                               | Female | 8.12 [4.03-16.91]        | 14.73 [7.26-30.49]     | 81.4   | 62.7 [31.16-130.78]   | 51.32 [25.17-107.19]  | 0.02 [0.02 to 0.03]    |
| Cabo Verde                            | Female | 0.8 [0.39-1.67]          | 1.53 [0.76-3.27]       | 91.25  | 63.5 [31.18-132.5]    | 53.39 [26.29-111.65]  | -0.01 [-0.02 to -0.01] |
| Cambodia                              | Female | 1.32 [0.58-2.83]         | 3.64 [1.6-7.92]        | 175.76 | 5.31 [2.4-11.16]      | 3.96 [1.8-8.35]       | 0.02 [0.02 to 0.03]    |
| Cameroon                              | Female | 15.04 [7.41-31.11]       | 41.07 [20.23-86.05]    | 173.07 | 62.56 [31-130.73]     | 52.1 [25.79-108.9]    | 0.01 [0.01 to 0.02]    |
| Canada                                | Female | 323.2 [159.39-673.8]     | 631.89 [315.93-1330.6] | 95.51  | 191.22 [94.28-398.84] | 148.46 [74-310.61]    | -0.01 [-0.01 to 0]     |
| Central African Republic              | Female | 4.11 [2.04-8.56]         | 7.86 [3.91-16.35]      | 91.24  | 62.27 [30.98-129.08]  | 52.8 [26.2-109.12]    | 0.02 [0.02 to 0.02]    |
| Chad                                  | Female | 9.29 [4.57-19.28]        | 17.46 [8.59-36.52]     | 87.94  | 62.82 [30.88-129.43]  | 50.84 [24.93-106.09]  | -0.01 [-0.01 to 0]     |
| Chile                                 | Female | 82.72 [41.19-171.66]     | 194.23 [96.81-410.43]  | 134.8  | 150.08 [74.84-310.83] | 103.87 [51.52-215.21] | 0 [0 to 0.01]          |
| China                                 | Female | 1160.55 [567.01-2398.61] | 3235.09 [1582.55-6848] | 178.75 | 26.79 [13.22-55.21]   | 30.12 [14.75-62.79]   | 0.56 [0.33 to 0.79]    |
| Colombia                              | Female | 30.48 [14.51-65]         | 96.99 [46.79-204.19]   | 218.21 | 33.3 [16.17-70.35]    | 27.74 [13.35-58.42]   | 0.03 [0.02 to 0.03]    |
| Comoros                               | Female | 0.73 [0.35-1.5]          | 1.7 [0.83-3.52]        | 132.88 | 62.92 [30.9-130.89]   | 52.87 [26.04-109.48]  | 0.02 [0.02 to 0.02]    |
| Congo                                 | Female | 3.82 [1.88-8.07]         | 9.14 [4.45-18.93]      | 139.27 | 62.57 [30.73-131.17]  | 52.06 [25.73-107.7]   | 0.01 [0 to 0.01]       |
| Costa Rica                            | Female | 2.99 [1.44-6.29]         | 9.36 [4.47-19.96]      | 213.04 | 33.34 [15.94-70.06]   | 27.58 [13.37-58.23]   | 0.01 [0 to 0.01]       |
| Cote d'Ivoire                         | Female | 12.66 [6.24-26.27]       | 34.51 [17.01-72.66]    | 172.59 | 62.01 [30.71-130]     | 51.27 [25.12-106.08]  | 0.03 [0.02 to 0.04]    |
| Croatia                               | Female | 13.33 [6.49-27.63]       | 15.38 [7.57-32.4]      | 15.38  | 35.64 [17.16-73.15]   | 31.42 [15.63-66.05]   | -0.22 [-0.28 to -0.16] |
| Cuba                                  | Female | 16.41 [8.09-34.13]       | 31.54 [15.6-65.45]     | 92.2   | 31.83 [15.67-66.39]   | 24.21 [11.77-50.45]   | 0 [-0.01 to 0]         |
| Cyprus                                | Female | 4.32 [2.15-8.96]         | 9.81 [4.87-20.54]      | 127.08 | 99.79 [49.23-207.86]  | 117.57 [58.46-247.33] | 0 [0 to 0.01]          |
| Czechia                               | Female | 26.22 [12.82-55.38]      | 36.1 [18.1-75.41]      | 37.68  | 33.55 [16.36-71.49]   | 31.24 [15.41-66.64]   | -0.01 [-0.01 to 0]     |
| Democratic People's Republic of Korea | Female | 27.93 [13.38-59.36]      | 52.01 [25.55-108.27]   | 86.22  | 27.92 [13.62-59.49]   | 27.27 [13.29-57.28]   | 0 [0 to 0]             |
| Democratic Republic of the Congo      | Female | 56.03 [27.78-115.94]     | 128.56 [63.22-269.76]  | 129.45 | 62.04 [30.82-127.95]  | 52.72 [26.18-110.37]  | 0.03 [0.03 to 0.03]    |
| Denmark                               | Female | 60.77 [30.71-125.25]     | 72.65 [35.59-153.7]    | 19.55  | 148.79 [74.9-307.66]  | 117.35 [57.9-246.68]  | -0.26 [-0.33 to -0.19] |
| Djibouti                              | Female | 0.48 [0.24-0.98]         | 1.94 [0.94-3.96]       | 304.17 | 63.02 [31.21-129.92]  | 51.14 [25.09-106.37]  | 0.01 [0.01 to 0.01]    |
| Dominica                              | Female | 0.13 [0.06-0.26]         | 0.14 [0.07-0.3]        | 7.69   | 32.01 [15.7-67.28]    | 23.8 [11.62-50.07]    | -0.02 [-0.02 to -0.02] |

|                    |        |                         |                          |        |                       |                      |                        |
|--------------------|--------|-------------------------|--------------------------|--------|-----------------------|----------------------|------------------------|
| Dominican Republic | Female | 6.1 [3.02-12.8]         | 15.48 [7.67-31.99]       | 153.77 | 32.11 [15.92-66.66]   | 24.2 [11.86-49.43]   | -0.02 [-0.02 to -0.01] |
| Ecuador            | Female | 21.03 [10.34-43.69]     | 71.09 [35.89-146.41]     | 238.04 | 76.54 [37.83-159.22]  | 58.25 [29.14-120.27] | 0.72 [0.57 to 0.87]    |
| Egypt              | Female | 60.58 [29.4-127.65]     | 125.09 [60.99-265.23]    | 106.49 | 40.24 [19.89-84.49]   | 27.9 [13.71-59.19]   | -0.01 [-0.01 to -0.01] |
| El Salvador        | Female | 5.29 [2.56-11.09]       | 11.3 [5.53-23.73]        | 113.61 | 33.41 [16.06-70.45]   | 27.96 [13.6-59.22]   | -0.01 [-0.01 to 0]     |
| Equatorial Guinea  | Female | 0.71 [0.36-1.49]        | 1.86 [0.91-3.91]         | 161.97 | 61.96 [31.02-130.04]  | 53.39 [26.44-111.39] | 0.04 [0.03 to 0.04]    |
| Eritrea            | Female | 3.81 [1.87-7.91]        | 10.18 [5.06-21.41]       | 167.19 | 62.57 [31.26-129.36]  | 53.44 [26.59-110.27] | 0.02 [0.01 to 0.02]    |
| Estonia            | Female | 11.03 [5.47-23.18]      | 12.47 [6.21-26.77]       | 13.06  | 87.36 [43.51-182.34]  | 71.17 [34.94-148.99] | 0.02 [0.02 to 0.02]    |
| Eswatini           | Female | 1.24 [0.62-2.57]        | 2.51 [1.26-5.16]         | 102.42 | 71.54 [35.92-147.77]  | 64.17 [32.17-132.73] | -0.05 [-0.05 to -0.04] |
| Ethiopia           | Female | 64.59 [32.14-134.33]    | 139.92 [69.47-292.43]    | 116.63 | 65.24 [32.56-135.91]  | 54.18 [26.84-113.45] | 0.05 [0.04 to 0.05]    |
| Fiji               | Female | 0.21 [0.1-0.45]         | 0.45 [0.22-0.97]         | 114.29 | 11.52 [5.52-24.15]    | 8.93 [4.27-18.88]    | -0.02 [-0.03 to -0.02] |
| Finland            | Female | 38.58 [19.35-80.18]     | 55.54 [27.47-116.11]     | 43.96  | 97.09 [48.4-204.62]   | 62.76 [30.89-130.99] | -0.02 [-0.04 to 0.01]  |
| France             | Female | 437.81 [217.7-920.62]   | 652.58 [322.67-1367.3]   | 49.06  | 100.09 [50.29-209.68] | 79.81 [39.96-168.54] | 0.01 [0.01 to 0.01]    |
| Gabon              | Female | 1.95 [0.96-4.09]        | 3.68 [1.81-7.68]         | 88.72  | 62.68 [30.95-130.85]  | 52.43 [26.13-108.76] | 0 [0 to 0]             |
| Gambia             | Female | 1.07 [0.53-2.26]        | 3.17 [1.58-6.57]         | 196.26 | 62.77 [30.94-132.02]  | 52.04 [25.9-106.96]  | -0.01 [-0.01 to -0.01] |
| Germany            | Female | 550.85 [272.54-1163.13] | 695.02 [351.69-1449.63]  | 26.17  | 77.5 [38.02-163.71]   | 53.64 [27.05-110.65] | -0.02 [-0.03 to -0.02] |
| Ghana              | Female | 21.44 [10.53-45.17]     | 59.99 [29.41-126.76]     | 179.8  | 62.84 [31.05-131.43]  | 53.38 [26.43-111.01] | 0.01 [0 to 0.01]       |
| Greece             | Female | 36.93 [18.31-76.01]     | 51.74 [25.85-106.31]     | 40.1   | 46.23 [22.87-95.25]   | 33.82 [16.8-69.61]   | 0.7 [0.42 to 0.99]     |
| Greenland          | Female | 0.34 [0.17-0.7]         | 0.65 [0.32-1.37]         | 91.18  | 187.32 [93.48-390.62] | 141.6 [70.74-293.47] | 0.03 [0.02 to 0.03]    |
| Grenada            | Female | 0.13 [0.06-0.26]        | 0.19 [0.09-0.39]         | 46.15  | 31.97 [15.78-66.68]   | 24.18 [11.85-50.41]  | -0.02 [-0.02 to -0.01] |
| Guam               | Female | 0.04 [0.02-0.1]         | 0.11 [0.05-0.24]         | 175    | 11.63 [5.69-24.32]    | 8.95 [4.31-18.63]    | 0 [-0.01 to 0]         |
| Guatemala          | Female | 6.25 [3.05-13.06]       | 20.2 [9.81-43.09]        | 223.2  | 33.09 [16.17-68.75]   | 27.53 [13.43-57.55]  | 0 [0 to 0]             |
| Guinea             | Female | 10.6 [5.19-22.11]       | 17.92 [8.88-36.94]       | 69.06  | 62.81 [30.59-130.59]  | 51.75 [25.58-107.68] | 0 [0 to 0.01]          |
| Guinea-Bissau      | Female | 1.36 [0.67-2.83]        | 2.61 [1.27-5.43]         | 91.91  | 62.65 [30.91-130.14]  | 52.93 [25.95-109.02] | 0 [0 to 0.01]          |
| Guyana             | Female | 0.62 [0.31-1.31]        | 1.07 [0.53-2.25]         | 72.58  | 31.51 [15.65-65.47]   | 24.07 [11.82-49.86]  | 0 [0 to 0]             |
| Haiti              | Female | 5.36 [2.63-11.13]       | 11.98 [5.84-24.94]       | 123.51 | 31.72 [15.58-66.02]   | 24.07 [11.8-49.81]   | -0.02 [-0.02 to -0.01] |
| Honduras           | Female | 3.53 [1.7-7.49]         | 10.81 [5.2-22.7]         | 206.23 | 33.31 [15.95-70.17]   | 27.34 [13.24-56.93]  | -0.01 [-0.01 to -0.01] |
| Hungary            | Female | 28.11 [13.76-59.44]     | 35.6 [17.6-74.12]        | 26.65  | 33.52 [16.32-70.98]   | 31.59 [15.5-66.84]   | 0.02 [0.02 to 0.02]    |
| Iceland            | Female | 2.72 [1.36-5.56]        | 5.25 [2.61-10.94]        | 93.01  | 192.82 [95.1-386.55]  | 179.59 [88.5-373.71] | 0.23 [-0.7 to 1.16]    |
| India              | Female | 750.15 [371.59-1581.53] | 2010.36 [996.11-4157.97] | 167.99 | 34.09 [17.08-70.87]   | 26.41 [13.17-55.04]  | 0.03 [0.03 to 0.03]    |
| Indonesia          | Female | 31.39 [14.02-67.57]     | 71.17 [32.09-151.71]     | 126.73 | 6.26 [2.9-13.28]      | 4.57 [2.09-9.42]     | 0.03 [0.03 to 0.03]    |



|                                  |        |                          |                          |        |                       |                       |                        |
|----------------------------------|--------|--------------------------|--------------------------|--------|-----------------------|-----------------------|------------------------|
| Iran (Islamic Republic of)       | Female | 87.88 [43.06-187.01]     | 262.57 [129.32-550.33]   | 198.78 | 67.58 [33.44-141.4]   | 46.17 [22.73-96.78]   | 0.06 [-0.11 to 0.23]   |
| Iraq                             | Female | 15.87 [7.68-33.78]       | 48.93 [23.7-104.46]      | 208.32 | 39.74 [19.51-84.51]   | 29.07 [14.2-60.89]    | 0.02 [0.02 to 0.03]    |
| Ireland                          | Female | 20.9 [10.4-43.95]        | 37.03 [18.19-77.83]      | 77.18  | 99.97 [49.77-208.95]  | 84.5 [41.9-177.88]    | 0 [0 to 0]             |
| Israel                           | Female | 33.91 [16.87-71.26]      | 78.29 [38.9-163.06]      | 130.88 | 135.16 [67.74-284.32] | 119.73 [59.09-252.38] | -0.44 [-0.65 to -0.24] |
| Italy                            | Female | 416.39 [207.58-864.85]   | 612.81 [310.23-1266.39]  | 47.17  | 87.16 [43.31-181.81]  | 71.95 [35.69-151.16]  | 0.32 [0.1 to 0.54]     |
| Jamaica                          | Female | 2.93 [1.43-6.1]          | 4.95 [2.47-10.33]        | 68.94  | 32.03 [15.65-66.91]   | 24.07 [11.9-50.43]    | -0.02 [-0.03 to -0.02] |
| Japan                            | Female | 1130.77 [553.15-2339.74] | 2316.7 [1153.02-4892.98] | 104.88 | 119.8 [58.43-247.75]  | 93.39 [46.08-197.07]  | 2.13 [1.67 to 2.6]     |
| Jordan                           | Female | 2.77 [1.34-5.85]         | 13.54 [6.51-28.84]       | 388.81 | 40.15 [19.47-84.61]   | 28.44 [13.82-60.14]   | 0.02 [0.01 to 0.02]    |
| Kazakhstan                       | Female | 63.84 [31.61-135.11]     | 85.61 [42.94-180.91]     | 34.1   | 82.52 [40.76-174.97]  | 65.11 [31.91-137.41]  | -0.01 [-0.01 to 0]     |
| Kenya                            | Female | 28.39 [14.2-59.09]       | 80.27 [39.82-167.09]     | 182.74 | 65.5 [32.79-135.8]    | 55.04 [27.34-115.33]  | 0.02 [0.02 to 0.03]    |
| Kuwait                           | Female | 1.02 [0.49-2.15]         | 5.3 [2.57-10.78]         | 419.61 | 40.32 [19.74-85.67]   | 26.92 [13.18-57.2]    | 0 [0 to 0.01]          |
| Kyrgyzstan                       | Female | 14.91 [7.32-31.51]       | 22.37 [11.15-47.11]      | 50.03  | 83.01 [40.8-173.82]   | 64.81 [31.95-136.44]  | 0.02 [0.01 to 0.02]    |
| Lao People's Democratic Republic | Female | 0.56 [0.25-1.19]         | 1.21 [0.54-2.56]         | 116.07 | 5.34 [2.4-11.22]      | 3.75 [1.7-7.88]       | 0.02 [0.01 to 0.03]    |
| Latvia                           | Female | 19.27 [9.59-40.63]       | 19.3 [9.56-41.01]        | 0.16   | 86.99 [43.77-183.15]  | 71.49 [35.1-150.86]   | 0.02 [0.02 to 0.03]    |
| Lebanon                          | Female | 4.75 [2.31-10.18]        | 11.34 [5.49-23.62]       | 138.74 | 40.17 [19.53-85.38]   | 29.97 [14.79-63.21]   | -0.02 [-0.02 to -0.01] |
| Lesotho                          | Female | 3.99 [1.99-8.28]         | 5.39 [2.71-11.2]         | 35.09  | 71.58 [35.81-148.2]   | 64.07 [32.18-132.47]  | -0.06 [-0.06 to -0.05] |
| Liberia                          | Female | 3.22 [1.57-6.7]          | 6.75 [3.36-13.88]        | 109.63 | 61.91 [30.63-128.64]  | 50.83 [25.12-104.06]  | 0.01 [0.01 to 0.01]    |
| Libya                            | Female | 3.56 [1.74-7.47]         | 10.67 [5.23-22.56]       | 199.72 | 40.28 [19.83-85.23]   | 28.65 [14.09-60.84]   | -0.03 [-0.03 to -0.02] |
| Lithuania                        | Female | 14.18 [7.1-29.85]        | 16.94 [8.37-34.9]        | 19.46  | 52.03 [26.13-108.85]  | 41.19 [20.4-85.6]     | 0.26 [0.11 to 0.42]    |
| Luxembourg                       | Female | 2.99 [1.48-6.29]         | 4.93 [2.44-10.32]        | 64.88  | 99.92 [49.94-204.73]  | 83.96 [41.47-177.29]  | -0.01 [-0.01 to -0.01] |
| Madagascar                       | Female | 16.48 [8.2-34.38]        | 38.83 [19.04-80.64]      | 135.62 | 62.73 [31.06-129.84]  | 52.27 [25.71-108.35]  | 0.02 [0.01 to 0.02]    |
| Malawi                           | Female | 13.29 [6.48-27.92]       | 25.99 [12.72-54.39]      | 95.56  | 62.55 [30.64-131.37]  | 52.99 [26.19-109.8]   | 0.02 [0.02 to 0.03]    |
| Malaysia                         | Female | 2.5 [1.11-5.37]          | 7.12 [3.14-15.35]        | 184.8  | 5.33 [2.4-11.32]      | 3.66 [1.64-7.68]      | 0 [0 to 0.01]          |
| Maldives                         | Female | 0.02 [0.01-0.04]         | 0.08 [0.03-0.16]         | 300    | 5.35 [2.46-11.48]     | 3.52 [1.61-7.46]      | 0.03 [0.02 to 0.04]    |
| Mali                             | Female | 13.51 [6.58-28.25]       | 27.65 [13.68-57.55]      | 104.66 | 62.54 [30.9-130.65]   | 51.5 [25.21-107]      | 0.03 [0.02 to 0.03]    |
| Malta                            | Female | 2.34 [1.16-4.87]         | 4.36 [2.15-9.08]         | 86.32  | 100.01 [49.61-207.73] | 84.55 [41.78-177.66]  | 0 [0 to 0]             |
| Marshall Islands                 | Female | 0.01 [0-0.02]            | 0.02 [0.01-0.04]         | 100    | 11.53 [5.49-24.38]    | 8.65 [4.13-18.1]      | -0.03 [-0.04 to -0.03] |
| Mauritania                       | Female | 3.34 [1.66-7.04]         | 6.91 [3.39-14.32]        | 106.89 | 63.1 [31.53-131.86]   | 52.14 [25.85-109.12]  | 0.01 [0.01 to 0.01]    |
| Mauritius                        | Female | 0.21 [0.09-0.45]         | 0.5 [0.23-1.09]          | 138.1  | 5.33 [2.39-11.45]     | 3.8 [1.73-8.04]       | -0.02 [-0.03 to -0.01] |
| Mexico                           | Female | 176.91 [87.29-367.89]    | 594.72 [298.04-1232.19]  | 236.17 | 77.97 [38.34-162.07]  | 84.34 [42.02-174.2]   | 0.84 [0.67 to 1.02]    |

|                                  |        |                        |                          |        |                       |                      |                        |
|----------------------------------|--------|------------------------|--------------------------|--------|-----------------------|----------------------|------------------------|
| Micronesia (Federated States of) | Female | 0.03 [0.01-0.06]       | 0.04 [0.02-0.09]         | 33.33  | 11.58 [5.55-24.53]    | 8.99 [4.35-18.55]    | -0.03 [-0.03 to -0.02] |
| Mongolia                         | Female | 4.68 [2.32-9.89]       | 11.61 [5.76-24.31]       | 148.08 | 83.13 [41.22-175.63]  | 64.81 [31.65-135.56] | 0.01 [0.01 to 0.02]    |
| Montenegro                       | Female | 1.18 [0.58-2.51]       | 1.78 [0.87-3.75]         | 50.85  | 33.91 [16.71-71.77]   | 31.54 [15.51-66.15]  | -0.01 [-0.02 to -0.01] |
| Morocco                          | Female | 28.4 [13.94-58.75]     | 66.15 [31.97-138.71]     | 132.92 | 40.26 [19.83-84.44]   | 29.08 [14.31-61.08]  | -0.01 [-0.02 to -0.01] |
| Mozambique                       | Female | 20.77 [10.15-42.88]    | 39.98 [19.77-83.26]      | 92.49  | 62.25 [30.64-127.83]  | 52.75 [26.44-108.4]  | 0.02 [0.01 to 0.03]    |
| Myanmar                          | Female | 6.4 [2.84-13.44]       | 13.95 [6.05-30.05]       | 117.97 | 5.34 [2.43-11.25]     | 3.9 [1.75-8.21]      | 0.01 [0 to 0.02]       |
| Namibia                          | Female | 2.81 [1.4-5.79]        | 5.95 [2.99-12.36]        | 111.74 | 71.39 [35.81-146.52]  | 64.17 [31.75-131.99] | -0.01 [-0.01 to 0]     |
| Nepal                            | Female | 14.85 [7.23-30.99]     | 38.05 [18.59-80.22]      | 156.23 | 31.95 [15.72-66.66]   | 24.78 [11.93-51.92]  | 0.02 [0.02 to 0.02]    |
| Netherlands                      | Female | 83.06 [42.61-168.24]   | 115.78 [58.46-243.83]    | 39.39  | 77.86 [39.7-159.6]    | 60.04 [29.79-127.79] | -0.45 [-0.71 to -0.18] |
| New Zealand                      | Female | 33.44 [16.66-68.5]     | 63.82 [31.65-131.46]     | 90.85  | 165.09 [82.75-346.54] | 112.58 [56.1-236.6]  | 0.02 [0.01 to 0.03]    |
| Nicaragua                        | Female | 2.73 [1.33-5.81]       | 8.31 [4.01-17.59]        | 204.4  | 33.32 [16.25-70.12]   | 27.72 [13.46-59.17]  | 0.01 [0 to 0.01]       |
| Niger                            | Female | 8.95 [4.41-18.68]      | 27.06 [13.32-57.04]      | 202.35 | 62.95 [31.16-132.19]  | 52.36 [26.02-109.38] | 0.01 [0.01 to 0.01]    |
| Nigeria                          | Female | 136.24 [67.66-284.81]  | 329.16 [162.69-687.25]   | 141.6  | 65.48 [32.72-136.48]  | 55.05 [27.36-115.11] | 0.02 [0.02 to 0.02]    |
| North Macedonia                  | Female | 3.34 [1.62-7.05]       | 5.59 [2.73-11.83]        | 67.37  | 33.73 [16.46-71.09]   | 31.36 [15.38-66.77]  | 0 [-0.01 to 0]         |
| Northern Mariana Islands         | Female | 0.01 [0-0.02]          | 0.03 [0.01-0.07]         | 200    | 11.61 [5.59-24.58]    | 8.79 [4.2-18.6]      | -0.02 [-0.03 to -0.02] |
| Norway                           | Female | 53.07 [26.72-110.62]   | 71.61 [36.14-149.09]     | 34.93  | 159.57 [80.1-328.78]  | 119.7 [59.91-249.15] | 0.22 [0.11 to 0.34]    |
| Oman                             | Female | 1.22 [0.6-2.56]        | 3.22 [1.57-6.78]         | 163.93 | 40.03 [19.68-84.81]   | 27.28 [13.2-57.78]   | 0 [-0.01 to 0]         |
| Pakistan                         | Female | 89.64 [44.91-190.93]   | 189.12 [93.63-397.16]    | 110.98 | 34.74 [17.29-72.52]   | 26.2 [12.8-55.13]    | -0.01 [-0.01 to 0]     |
| Palestine                        | Female | 1.93 [0.95-4.11]       | 5.16 [2.51-10.85]        | 167.36 | 40.11 [19.73-85.32]   | 29.26 [14.33-61.86]  | -0.01 [-0.02 to -0.01] |
| Panama                           | Female | 2.47 [1.21-5.24]       | 7.13 [3.51-14.92]        | 188.66 | 33.41 [16.35-70.72]   | 27.25 [13.24-57.43]  | 0 [-0.01 to 0]         |
| Papua New Guinea                 | Female | 1.03 [0.48-2.16]       | 2.64 [1.26-5.69]         | 156.31 | 11.49 [5.44-23.9]     | 8.64 [4.2-17.89]     | 0 [-0.01 to 0.01]      |
| Paraguay                         | Female | 3.69 [1.81-7.71]       | 9.29 [4.55-19.09]        | 151.76 | 31.85 [15.68-66.65]   | 24.16 [11.91-49.9]   | 0 [-0.01 to 0]         |
| Peru                             | Female | 21.43 [10.56-45.06]    | 58.31 [28.93-123.92]     | 172.1  | 34.84 [17.24-73.14]   | 26.06 [12.95-54.36]  | 0.21 [0.08 to 0.35]    |
| Philippines                      | Female | 9.54 [4.33-20.14]      | 26.12 [11.97-55.51]      | 173.79 | 6.31 [2.91-13.39]     | 4.64 [2.15-9.51]     | 0.02 [0.01 to 0.02]    |
| Poland                           | Female | 91.05 [46.11-192.63]   | 139.3 [70.08-290.99]     | 52.99  | 36.22 [18.2-76.27]    | 34.13 [16.93-71.64]  | 0.03 [0.03 to 0.04]    |
| Portugal                         | Female | 99.05 [49.49-204.85]   | 151.61 [75.67-315.96]    | 53.06  | 130.66 [65.31-268.66] | 92.43 [45.55-191.6]  | 0.36 [0.24 to 0.47]    |
| Puerto Rico                      | Female | 6.16 [3.04-12.94]      | 11.58 [5.75-24.07]       | 87.99  | 31.93 [15.73-66.92]   | 24.56 [11.98-51.54]  | -0.01 [-0.02 to -0.01] |
| Qatar                            | Female | 0.17 [0.08-0.36]       | 1.32 [0.64-2.76]         | 676.47 | 39.83 [19.4-83.7]     | 22.78 [11.21-47.38]  | -0.03 [-0.04 to -0.02] |
| Republic of Korea                | Female | 406.95 [205.63-841.82] | 1083.93 [540.63-2270.21] | 166.35 | 226.2 [114.28-468.34] | 135.2 [68.07-281.23] | 0.73 [0.46 to 0.99]    |
| Republic of Moldova              | Female | 22.75 [11.27-48.26]    | 29.1 [14.42-61.43]       | 27.91  | 87.04 [43.19-183.49]  | 70.96 [35.12-147.66] | 0.01 [0.01 to 0.01]    |

|                                  |        |                           |                           |        |                        |                       |                        |
|----------------------------------|--------|---------------------------|---------------------------|--------|------------------------|-----------------------|------------------------|
| Romania                          | Female | 52.3 [25.67-111.32]       | 67.38 [33.14-143.22]      | 28.83  | 33.91 [16.77-72.38]    | 31.75 [15.54-67.4]    | 0.01 [0.01 to 0.02]    |
| Russian Federation               | Female | 2437.93 [1225.85-4981.64] | 2755.17 [1373.98-5734.23] | 13.01  | 216.83 [109.97-440.63] | 178 [89.5-370.48]     | -0.8 [-1.01 to -0.59]  |
| Rwanda                           | Female | 10.27 [5.07-21.23]        | 22.96 [11.18-48.4]        | 123.56 | 62.63 [30.84-130.22]   | 53.54 [26.15-111.61]  | 0.03 [0.02 to 0.04]    |
| Saint Lucia                      | Female | 0.15 [0.07-0.32]          | 0.36 [0.18-0.75]          | 140    | 31.69 [15.68-66.96]    | 24.05 [11.77-49.19]   | 0 [-0.01 to 0]         |
| Saint Vincent and the Grenadines | Female | 0.12 [0.06-0.26]          | 0.21 [0.1-0.44]           | 75     | 31.91 [15.92-66.56]    | 23.54 [11.47-48.86]   | -0.01 [-0.01 to -0.01] |
| Samoa                            | Female | 0.05 [0.02-0.11]          | 0.09 [0.04-0.18]          | 80     | 11.6 [5.57-24.72]      | 8.86 [4.22-18.46]     | -0.02 [-0.03 to -0.02] |
| Sao Tome and Principe            | Female | 0.21 [0.11-0.44]          | 0.37 [0.18-0.77]          | 76.19  | 63.11 [31.5-130.36]    | 52.24 [25.75-108.66]  | -0.01 [-0.01 to 0]     |
| Saudi Arabia                     | Female | 22.36 [11.38-46.06]       | 77.24 [38.07-155.91]      | 245.44 | 87.51 [44.19-180.92]   | 69.58 [35.23-144.03]  | -0.53 [-0.75 to -0.32] |
| Senegal                          | Female | 10.4 [5.07-21.72]         | 25.63 [12.57-53.24]       | 146.44 | 62.78 [30.93-130.49]   | 52.23 [25.59-109.1]   | 0 [0 to 0]             |
| Serbia                           | Female | 21.07 [10.21-45.03]       | 27.54 [13.45-58.28]       | 30.71  | 33.81 [16.39-72.29]    | 31.38 [15.26-66.5]    | -0.01 [-0.02 to -0.01] |
| Seychelles                       | Female | 0.02 [0.01-0.04]          | 0.03 [0.01-0.07]          | 50     | 5.39 [2.39-11.61]      | 3.76 [1.73-7.85]      | -0.04 [-0.05 to -0.03] |
| Sierra Leone                     | Female | 5.93 [2.93-12.26]         | 11.7 [5.75-24.34]         | 97.3   | 62.84 [31.11-131.98]   | 51.72 [25.41-107.09]  | 0 [0 to 0.01]          |
| Singapore                        | Female | 23.31 [11.65-48.94]       | 75.89 [37.87-159.57]      | 225.57 | 185.48 [93.37-388.65]  | 108.11 [53.74-226.75] | 0.4 [0.28 to 0.52]     |
| Slovakia                         | Female | 11.35 [5.61-24.2]         | 17.14 [8.37-36.4]         | 51.01  | 33.78 [16.67-72.2]     | 31.63 [15.38-66.77]   | 0.01 [0 to 0.01]       |
| Slovenia                         | Female | 4.82 [2.34-10.31]         | 7.39 [3.66-15.64]         | 53.32  | 33.57 [16.28-71.82]    | 31.43 [15.42-65.34]   | 0.01 [0.01 to 0.02]    |
| Solomon Islands                  | Female | 0.07 [0.03-0.15]          | 0.18 [0.08-0.37]          | 157.14 | 11.57 [5.45-23.87]     | 8.76 [4.22-18.03]     | -0.02 [-0.02 to -0.02] |
| Somalia                          | Female | 9.1 [4.49-18.8]           | 24.78 [12.21-51.92]       | 172.31 | 62.54 [30.95-129.96]   | 53.43 [26.58-111.58]  | 0.01 [0.01 to 0.01]    |
| South Africa                     | Female | 89.15 [44.97-187.21]      | 193.67 [97.47-404.66]     | 117.24 | 73.95 [37.31-154.62]   | 66.45 [33.21-137.17]  | -0.02 [-0.03 to -0.02] |
| South Sudan                      | Female | 6.59 [3.26-13.56]         | 12.66 [6.13-25.83]        | 92.11  | 61.5 [30.74-126.61]    | 50.3 [24.83-103.29]   | 0.01 [0.01 to 0.02]    |
| Spain                            | Female | 309.57 [154.34-653.57]    | 672.49 [267.12-1708.76]   | 117.23 | 106.6 [53.38-220.6]    | 106.59 [42.69-258.3]  | 1.97 [1.56 to 2.38]    |
| Sri Lanka                        | Female | 2.86 [1.26-5.99]          | 7.5 [3.34-16.25]          | 162.24 | 5.35 [2.38-11.05]      | 3.85 [1.74-8.23]      | -0.02 [-0.03 to -0.01] |
| Sudan                            | Female | 18 [8.77-38.16]           | 36.4 [17.72-76.49]        | 102.22 | 40.23 [19.68-85.12]    | 28.05 [13.96-58.8]    | 0 [-0.01 to 0]         |
| Suriname                         | Female | 0.44 [0.22-0.9]           | 1.04 [0.51-2.15]          | 136.36 | 31.83 [15.72-66.15]    | 24.28 [11.8-49.85]    | -0.03 [-0.04 to -0.03] |
| Sweden                           | Female | 41.58 [20.33-87.43]       | 52.98 [26.27-112.07]      | 27.42  | 54.88 [26.76-115.8]    | 46.94 [22.94-97.96]   | -0.2 [-0.57 to 0.17]   |
| Switzerland                      | Female | 54.11 [27.01-112.14]      | 82.48 [40.8-173.25]       | 52.43  | 99.64 [49.23-207.65]   | 84.61 [41.98-176.3]   | 0.01 [0.01 to 0.01]    |
| Syrian Arab Republic             | Female | 10.41 [5.12-22.03]        | 26.15 [12.7-55.19]        | 151.2  | 40.23 [19.9-84.49]     | 28.49 [13.98-60.85]   | -0.01 [-0.02 to -0.01] |
| Tajikistan                       | Female | 12.92 [6.35-27.09]        | 23.83 [11.75-50.56]       | 84.44  | 83.33 [40.95-174.57]   | 62.85 [30.67-132.68]  | -0.01 [-0.01 to -0.01] |
| Thailand                         | Female | 9.96 [4.42-21.29]         | 30.32 [13.57-65.42]       | 204.42 | 5.24 [2.35-11.31]      | 3.84 [1.7-8.17]       | 0.15 [0.13 to 0.18]    |
| Timor-Leste                      | Female | 0.08 [0.03-0.16]          | 0.21 [0.1-0.45]           | 162.5  | 5.32 [2.39-10.96]      | 3.65 [1.65-7.5]       | 0.03 [0.01 to 0.05]    |
| Togo                             | Female | 4.4 [2.16-9.24]           | 13.98 [6.84-29.39]        | 217.73 | 62.92 [31-131.46]      | 53.63 [26.56-112.04]  | 0.01 [0.01 to 0.01]    |

|                                       |        |                           |                            |        |                       |                       |                        |
|---------------------------------------|--------|---------------------------|----------------------------|--------|-----------------------|-----------------------|------------------------|
| Tonga                                 | Female | 0.03 [0.02-0.07]          | 0.05 [0.02-0.1]            | 66.67  | 11.62 [5.51-24.18]    | 9.03 [4.37-18.99]     | -0.01 [-0.02 to -0.01] |
| Trinidad and Tobago                   | Female | 1.39 [0.67-2.86]          | 3.07 [1.52-6.36]           | 120.86 | 31.82 [15.46-65.62]   | 24.03 [11.99-49.36]   | 0 [0 to 0]             |
| Tunisia                               | Female | 10.12 [4.9-21.22]         | 26.72 [12.95-56.98]        | 164.03 | 40.48 [19.71-84.55]   | 29.34 [14.46-62.68]   | -0.01 [-0.01 to -0.01] |
| Turkey                                | Female | 21.8 [10.47-46.22]        | 54.53 [25.77-118.33]       | 150.14 | 11.6 [5.57-24.64]     | 8.15 [3.88-17.3]      | -0.12 [-0.26 to 0.02]  |
| Turkmenistan                          | Female | 4.79 [2.34-9.99]          | 11.44 [5.63-24.16]         | 138.83 | 43.73 [21.54-91.14]   | 49.05 [24.19-102.49]  | 0.61 [0.43 to 0.78]    |
| Uganda                                | Female | 21.38 [10.55-44.88]       | 52.16 [25.74-109.16]       | 143.97 | 62.39 [30.98-130.37]  | 53.14 [25.79-110.09]  | 0.03 [0.03 to 0.04]    |
| Ukraine                               | Female | 317.41 [154.91-663.15]    | 330.35 [161.51-690.09]     | 4.08   | 71.36 [34.66-152.97]  | 57.95 [28.58-121.6]   | 0.31 [0.15 to 0.48]    |
| United Arab Emirates                  | Female | 0.64 [0.31-1.32]          | 5.42 [2.56-11.44]          | 746.88 | 39.87 [19.35-83.6]    | 23.57 [11.55-48.82]   | -0.02 [-0.02 to -0.01] |
| United Kingdom                        | Female | 405.97 [200.13-843.91]    | 572.44 [287.07-1189.65]    | 41.01  | 85.76 [42.41-178.14]  | 81.32 [40.18-170.64]  | 0.27 [-0.19 to 0.74]   |
| United Republic of Tanzania           | Female | 36.24 [17.78-74.56]       | 85.39 [41.87-178.08]       | 135.62 | 62.46 [30.65-128.29]  | 52.3 [25.62-108.12]   | 0.02 [0.02 to 0.03]    |
| United States of America              | Female | 3197.19 [1643.14-6641.13] | 6269.71 [3133.83-13118.81] | 96.1   | 195.17 [100.48-406.6] | 176.31 [89.12-366.47] | 0.44 [0.28 to 0.6]     |
| United States Virgin Islands          | Female | 0.15 [0.07-0.32]          | 0.32 [0.15-0.66]           | 113.33 | 32.09 [15.92-66.77]   | 24.72 [11.98-50.98]   | -0.01 [-0.02 to -0.01] |
| Uruguay                               | Female | 31.37 [15.57-65.02]       | 41.72 [20.66-87.37]        | 32.99  | 151.13 [75.22-314.78] | 105.68 [52.12-223.91] | 0 [-0.01 to 0]         |
| Uzbekistan                            | Female | 53.73 [26.49-112.63]      | 103.76 [52.04-219.18]      | 93.11  | 83.14 [41.18-174.13]  | 64.17 [31.44-134.29]  | -0.01 [-0.01 to 0]     |
| Vanuatu                               | Female | 0.03 [0.02-0.07]          | 0.09 [0.05-0.2]            | 200    | 11.56 [5.47-24.36]    | 8.69 [4.17-18.22]     | -0.02 [-0.02 to -0.02] |
| Venezuela<br>(Bolivarian Republic of) | Female | 7.61 [3.73-16.11]         | 23.62 [11.46-50.07]        | 210.38 | 14.99 [7.39-32.02]    | 11.32 [5.44-24.07]    | -0.01 [-0.02 to 0]     |
| VietNam                               | Female | 12.29 [5.53-25.45]        | 28.65 [12.6-58.69]         | 133.12 | 5.39 [2.44-11.16]     | 3.96 [1.83-8.18]      | 0.01 [0 to 0.01]       |
| Yemen                                 | Female | 10.23 [4.89-21.15]        | 28.03 [13.61-59.08]        | 174    | 40.03 [19.44-83.6]    | 29.12 [14.03-61.72]   | 0.01 [0.01 to 0.01]    |
| Zambia                                | Female | 9.17 [4.54-18.86]         | 23.07 [11.33-49.05]        | 151.58 | 62.66 [31.12-129.49]  | 52.13 [25.93-109.08]  | 0.01 [0.01 to 0.02]    |
| Zimbabwe                              | Female | 15.75 [7.81-32.32]        | 30.36 [15.13-62.9]         | 92.76  | 71.66 [35.71-146.85]  | 64.33 [32.01-132.59]  | -0.02 [-0.03 to -0.02] |

Supplementary Table S6. Age distribution of DALYs rate (per 100,000) for hand osteoarthritis in different countries in 2019.

Supplementary Table S6. Age distribution of DALYs rate (per 100,000) for Osteoarthritis-hand in different countries in 2019.

| country             | sex    | <5 | 5 to 9 | 10 to 14 | 15 to 19 | 20 to 24 | 25 to 29 | 30 to 34 | 35 to 39 | 40 to 44 | 45 to 49 | 50 to 54 | 55 to 59 | 60 to 64 | 65 to 69 | 70 to 74 | 75 to 79 | 80 to 84 | 85 to 89 | 90 to 94 | 95+    |
|---------------------|--------|----|--------|----------|----------|----------|----------|----------|----------|----------|----------|----------|----------|----------|----------|----------|----------|----------|----------|----------|--------|
| Afghanistan         | Male   | 0  | 0      | 0        | 0        | 0        | 0        | 0.78     | 5.08     | 13.72    | 26.35    | 41.39    | 55.68    | 68.1     | 77.34    | 83.56    | 89.74    | 95.46    | 101.62   | 108.83   | 116.2  |
| Afghanistan         | Female | 0  | 0      | 0        | 0        | 0        | 0        | 1.14     | 7.82     | 24.24    | 53.76    | 92.3     | 130.6    | 162.57   | 184.06   | 197.31   | 207.02   | 216.17   | 225.52   | 236.84   | 249.89 |
| Albania             | Male   | 0  | 0      | 0        | 0        | 0        | 0        | 0.91     | 6.33     | 18.95    | 39.68    | 65.64    | 93.33    | 117.59   | 135.34   | 147.8    | 156.76   | 166.5    | 174.57   | 184.76   | 194.65 |
| Albania             | Female | 0  | 0      | 0        | 0        | 0        | 0        | 0.97     | 6.74     | 20.15    | 42.69    | 73.19    | 106.19   | 137.78   | 162.34   | 181.26   | 196.54   | 210.28   | 223.79   | 238.62   | 255.33 |
| Algeria             | Male   | 0  | 0      | 0        | 0        | 0        | 0        | 0.78     | 5.15     | 14.21    | 26.99    | 42.75    | 57.02    | 70.17    | 79.46    | 86.07    | 92.17    | 97.72    | 103.67   | 112.23   | 119.81 |
| Algeria             | Female | 0  | 0      | 0        | 0        | 0        | 0        | 1.15     | 8.09     | 24.76    | 54.95    | 94.35    | 134.15   | 166.63   | 189.27   | 203.22   | 213.77   | 222.19   | 232.35   | 244.44   | 258.51 |
| American Samoa      | Male   | 0  | 0      | 0        | 0        | 0        | 0        | 0.26     | 1.62     | 3.74     | 6.6      | 10.96    | 16.65    | 22.87    | 28.25    | 33.34    | 38.41    | 44.56    | 50.91    | 59.13    | 68.21  |
| American Samoa      | Female | 0  | 0      | 0        | 0        | 0        | 0        | 0.46     | 2.98     | 7.53     | 14.63    | 23.36    | 33.62    | 43.56    | 52.28    | 59.31    | 67.15    | 75.19    | 84.95    | 96.57    | 111.06 |
| Andorra             | Male   | 0  | 0      | 0        | 0        | 0        | 0        | 7.05     | 47.5     | 126.05   | 248.01   | 427.07   | 627.56   | 761.24   | 821.04   | 841.85   | 844.72   | 842.66   | 839.48   | 839.19   | 835.54 |
| Andorra             | Female | 0  | 0      | 0        | 0        | 0        | 0        | 3.03     | 21.04    | 61.42    | 133.55   | 235.61   | 342.97   | 428.06   | 478.77   | 506.77   | 521.84   | 528.22   | 528.86   | 530.06   | 531.29 |
| Angola              | Male   | 0  | 0      | 0        | 0        | 0        | 0        | 1.7      | 11.9     | 35.11    | 68.65    | 103.21   | 134.77   | 158.68   | 174.4    | 185.38   | 194.64   | 203.39   | 212.49   | 221.7    | 231.77 |
| Angola              | Female | 0  | 0      | 0        | 0        | 0        | 0        | 2.14     | 15.9     | 49.06    | 99.59    | 155.57   | 208.42   | 250.71   | 280.2    | 300.44   | 314.87   | 328.64   | 342.04   | 356.3    | 371.3  |
| Antigua and Barbuda | Male   | 0  | 0      | 0        | 0        | 0        | 0        | 0.57     | 3.94     | 10.89    | 21.68    | 35.26    | 49.41    | 62.32    | 71.81    | 79.54    | 87.3     | 95.39    | 104.77   | 115.68   | 126.98 |
| Antigua and Barbuda | Female | 0  | 0      | 0        | 0        | 0        | 0        | 0.89     | 6.37     | 19.64    | 41.96    | 70.93    | 101.17   | 128      | 149.12   | 164.55   | 178.08   | 192.52   | 206.46   | 223.49   | 242.26 |
| Argentina           | Male   | 0  | 0      | 0        | 0        | 0        | 0        | 1.66     | 11.12    | 31.94    | 65.68    | 110.42   | 162.33   | 210.68   | 243.86   | 265.34   | 277.52   | 286.8    | 294.24   | 303.31   | 310.39 |
| Argentina           | Female | 0  | 0      | 0        | 0        | 0        | 0        | 3.91     | 29.82    | 99.32    | 227.01   | 390.08   | 541.88   | 640.04   | 687.92   | 711.26   | 721.95   | 728.04   | 730.9    | 736.14   | 739.51 |
| Armenia             | Male   | 0  | 0      | 0        | 0        | 0        | 0        | 1.32     | 9.41     | 28.4     | 58.23    | 93.65    | 130.08   | 161.82   | 186.17   | 202.83   | 214.72   | 225.36   | 233.66   | 242.5    | 250.81 |
| Armenia             | Female | 0  | 0      | 0        | 0        | 0        | 0        | 1.96     | 14.84    | 50.13    | 113.71   | 196.35   | 279.45   | 348.06   | 393.63   | 420.77   | 438.08   | 449.19   | 459.48   | 471.67   | 484.27 |
| Australia           | Male   | 0  | 0      | 0        | 0        | 0        | 0        | 1.65     | 11.23    | 31.8     | 65.13    | 109.47   | 161.16   | 209.07   | 241.3    | 260.72   | 272.32   | 281.53   | 288.14   | 293.21   | 298.18 |
| Australia           | Female | 0  | 0      | 0        | 0        | 0        | 0        | 3.72     | 29.29    | 101.89   | 243.07   | 428.22   | 600.08   | 708.71   | 756.29   | 773.13   | 777.15   | 776.35   | 770.43   | 763.96   | 753.51 |
| Austria             | Male   | 0  | 0      | 0        | 0        | 0        | 0        | 6.25     | 42.59    | 112.24   | 220.64   | 376.61   | 553.52   | 678.78   | 734.89   | 755.1    | 761.1    | 762.65   | 761.21   | 761.96   | 759.68 |
| Austria             | Female | 0  | 0      | 0        | 0        | 0        | 0        | 3.03     | 20.99    | 61.39    | 133.38   | 235.13   | 342.26   | 425.94   | 476.84   | 504.38   | 520.32   | 529.83   | 534      | 538.26   | 544.3  |
| Azerbaijan          | Male   | 0  | 0      | 0        | 0        | 0        | 0        | 1.18     | 8.39     | 24.71    | 50.52    | 81.3     | 113.35   | 141.62   | 164.23   | 179.42   | 191.99   | 201.38   | 210.81   | 218.94   | 227.92 |
| Azerbaijan          | Female | 0  | 0      | 0        | 0        | 0        | 0        | 2.36     | 18.29    | 62       | 142.68   | 247.42   | 350.4    | 431.65   | 482.01   | 511.08   | 528.15   | 539.35   | 547.42   | 559.09   | 569.65 |
| Bahamas             | Male   | 0  | 0      | 0        | 0        | 0        | 0        | 0.57     | 3.92     | 10.9     | 21.65    | 35.13    | 49.77    | 62.26    | 71.75    | 79.93    | 87.75    | 96.25    | 105.32   | 116.04   | 128.25 |
| Bahamas             | Female | 0  | 0      | 0        | 0        | 0        | 0        | 0.89     | 6.36     | 19.53    | 42.22    | 70.84    | 101.26   | 128.65   | 149.27   | 165.73   | 178.76   | 193.17   | 207.35   | 224.25   | 243.81 |
| Bahrain             | Male   | 0  | 0      | 0        | 0        | 0        | 0        | 0.78     | 5.25     | 14.19    | 27.18    | 42.06    | 57       | 68.84    | 77.58    | 83.93    | 89.64    | 95.69    | 101.71   | 108.81   | 117.24 |

| Country                          | Sex    | 2000 | 2001 | 2002 | 2003 | 2004 | 2005 | 2006 | 2007 | 2008  | 2009   | 2010   | 2011   | 2012   | 2013   | 2014   | 2015   | 2016   | 2017   | 2018   | 2019   | 2020   |
|----------------------------------|--------|------|------|------|------|------|------|------|------|-------|--------|--------|--------|--------|--------|--------|--------|--------|--------|--------|--------|--------|
| Bahrain                          | Female | 0    | 0    | 0    | 0    | 0    | 0    | 0    | 1.14 | 8.09  | 24.58  | 54.63  | 93.85  | 132.87 | 164.38 | 185.48 | 200.25 | 209.79 | 218.51 | 227.93 | 239.99 | 254.35 |
| Bangladesh                       | Male   | 0    | 0    | 0    | 0    | 0    | 0    | 0    | 0.61 | 3.98  | 11.39  | 22.45  | 36.33  | 51.59  | 65.86  | 76.91  | 85.54  | 94.04  | 103.36 | 112.32 | 123.62 | 134.69 |
| Bangladesh                       | Female | 0    | 0    | 0    | 0    | 0    | 0    | 0    | 0.97 | 6.59  | 20.26  | 42.29  | 70.5   | 100.72 | 128.74 | 150.91 | 167.57 | 183.66 | 198.46 | 213.57 | 231.35 | 251.05 |
| Barbados                         | Male   | 0    | 0    | 0    | 0    | 0    | 0    | 0    | 0.57 | 3.94  | 10.93  | 21.73  | 34.96  | 49.44  | 62.34  | 72.53  | 80.46  | 88.2   | 95.68  | 105.55 | 116.4  | 128.63 |
| Barbados                         | Female | 0    | 0    | 0    | 0    | 0    | 0    | 0    | 0.89 | 6.35  | 19.47  | 42.08  | 70.8   | 101.42 | 128.26 | 149.18 | 164.87 | 179.16 | 192.56 | 206.99 | 225.37 | 243.93 |
| Belarus                          | Male   | 0    | 0    | 0    | 0    | 0    | 0    | 0    | 1.87 | 12.96 | 37.22  | 74.34  | 116.93 | 158.69 | 192.11 | 215.15 | 229.85 | 240.6  | 249.63 | 258.7  | 267.17 | 275.67 |
| Belarus                          | Female | 0    | 0    | 0    | 0    | 0    | 0    | 0    | 2.57 | 18.74 | 59.05  | 125.6  | 209.62 | 293.63 | 362.28 | 408.87 | 437.09 | 454.27 | 464.22 | 475.34 | 489.33 | 502.8  |
| Belgium                          | Male   | 0    | 0    | 0    | 0    | 0    | 0    | 0    | 4.71 | 31.2  | 81.21  | 157.69 | 268.52 | 400.45 | 505.81 | 560.52 | 583.18 | 591.29 | 595.02 | 595.38 | 596.16 | 595.82 |
| Belgium                          | Female | 0    | 0    | 0    | 0    | 0    | 0    | 0    | 3.04 | 21.05 | 61.46  | 132.75 | 234.2  | 341.86 | 424.84 | 475.39 | 502.52 | 517.46 | 524.37 | 527.66 | 529.96 | 533.27 |
| Belize                           | Male   | 0    | 0    | 0    | 0    | 0    | 0    | 0    | 0.57 | 3.92  | 10.91  | 21.52  | 34.99  | 49.58  | 62.2   | 72.36  | 80.58  | 87.9   | 96.6   | 105.49 | 116.5  | 127.91 |
| Belize                           | Female | 0    | 0    | 0    | 0    | 0    | 0    | 0    | 0.89 | 6.27  | 19.43  | 42.14  | 70.92  | 100.84 | 127.83 | 149.4  | 164.8  | 179.25 | 192.38 | 206.18 | 224.33 | 243.4  |
| Benin                            | Male   | 0    | 0    | 0    | 0    | 0    | 0    | 0    | 1.71 | 12.13 | 35.52  | 68.88  | 104.57 | 136.08 | 160.39 | 176.04 | 186.34 | 195.73 | 203.94 | 211.99 | 221.38 | 231.11 |
| Benin                            | Female | 0    | 0    | 0    | 0    | 0    | 0    | 0    | 2.16 | 15.98 | 49.19  | 99.73  | 156.24 | 208.75 | 250.43 | 279.26 | 299.53 | 315.43 | 329.27 | 342.74 | 357.79 | 372.79 |
| Bermuda                          | Male   | 0    | 0    | 0    | 0    | 0    | 0    | 0    | 0.57 | 3.91  | 10.94  | 21.52  | 35.24  | 49.61  | 62.62  | 72.38  | 80.18  | 87     | 95.71  | 104.93 | 115.21 | 126.76 |
| Bermuda                          | Female | 0    | 0    | 0    | 0    | 0    | 0    | 0    | 0.89 | 6.37  | 19.61  | 42.27  | 71.13  | 102.19 | 129.14 | 150.5  | 166.63 | 180.58 | 193.82 | 207.57 | 224.41 | 242.77 |
| Bhutan                           | Male   | 0    | 0    | 0    | 0    | 0    | 0    | 0    | 0.61 | 4.09  | 11.22  | 22.46  | 36.62  | 51.64  | 65.44  | 76.28  | 85.47  | 93.96  | 102.67 | 111.92 | 122.72 | 134.13 |
| Bhutan                           | Female | 0    | 0    | 0    | 0    | 0    | 0    | 0    | 0.97 | 6.75  | 20.44  | 42.63  | 70.69  | 100.53 | 129.3  | 151.4  | 168.68 | 183.12 | 197.66 | 211.51 | 228.68 | 246.89 |
| Bolivia (Plurinational State of) | Male   | 0    | 0    | 0    | 0    | 0    | 0    | 0    | 0.64 | 4.4   | 12.84  | 26.61  | 43.79  | 61.5   | 76.65  | 88.25  | 97.09  | 104.49 | 113.18 | 121.24 | 131.23 | 143.36 |
| Bolivia (Plurinational State of) | Female | 0    | 0    | 0    | 0    | 0    | 0    | 0    | 1.28 | 9.32  | 30.4   | 68.2   | 118.29 | 169.05 | 210.65 | 238.23 | 258.81 | 273.92 | 286.42 | 298.07 | 311.98 | 330.73 |
| Bosnia and Herzegovina           | Male   | 0    | 0    | 0    | 0    | 0    | 0    | 0    | 0.91 | 6.37  | 19.09  | 39.24  | 65.5   | 92.37  | 116.37 | 133.1  | 145.23 | 153.86 | 163.57 | 172.55 | 182.74 | 193.11 |
| Bosnia and Herzegovina           | Female | 0    | 0    | 0    | 0    | 0    | 0    | 0    | 0.97 | 6.73  | 20.18  | 42.71  | 72.35  | 105.78 | 135.8  | 159.92 | 177.83 | 192.7  | 205.91 | 219.59 | 234.42 | 251.39 |
| Botswana                         | Male   | 0    | 0    | 0    | 0    | 0    | 0    | 0    | 2.86 | 19.9  | 56.02  | 102.13 | 146.04 | 181.33 | 207.15 | 222.52 | 231.81 | 239.58 | 245.83 | 252.31 | 259.85 | 268.53 |
| Botswana                         | Female | 0    | 0    | 0    | 0    | 0    | 0    | 0    | 3.13 | 22.69 | 65.69  | 124.1  | 182.49 | 233.32 | 272.34 | 299.15 | 318.68 | 333.04 | 346.04 | 357.16 | 370.59 | 385.5  |
| Brazil                           | Male   | 0    | 0    | 0    | 0    | 0    | 0    | 0    | 0.62 | 4.15  | 11.66  | 23.13  | 37.33  | 52.4   | 66.48  | 78.22  | 88.34  | 99.21  | 111.6  | 124.78 | 140.15 | 156.67 |
| Brazil                           | Female | 0    | 0    | 0    | 0    | 0    | 0    | 0    | 0.94 | 6.67  | 20.77  | 44.53  | 74.34  | 105.19 | 134.41 | 159.05 | 179.92 | 199.68 | 219.95 | 240.46 | 263.39 | 288.74 |
| Brunei Darussalam                | Male   | 0    | 0    | 0    | 0    | 0    | 0    | 0    | 0.84 | 5.66  | 15.35  | 31.74  | 56.4   | 88.2   | 121.92 | 149.02 | 169.03 | 181.28 | 190.97 | 198.6  | 208.44 | 217.87 |
| Brunei Darussalam                | Female | 0    | 0    | 0    | 0    | 0    | 0    | 0    | 4.41 | 35.23 | 124.04 | 290.27 | 497.52 | 676.98 | 785.71 | 832.82 | 850.81 | 855.69 | 854.13 | 851.16 | 853.45 | 855.41 |
| Bulgaria                         | Male   | 0    | 0    | 0    | 0    | 0    | 0    | 0    | 0.91 | 6.33  | 19.16  | 39.5   | 65.47  | 92.65  | 116.64 | 134.11 | 145.88 | 156.13 | 165.26 | 174.72 | 183.77 | 194.15 |

|                          |        |   |   |   |   |   |   |      |       |        |        |        |        |        |        |        |        |        |        |        |        |
|--------------------------|--------|---|---|---|---|---|---|------|-------|--------|--------|--------|--------|--------|--------|--------|--------|--------|--------|--------|--------|
| Bulgaria                 | Female | 0 | 0 | 0 | 0 | 0 | 0 | 0.97 | 6.68  | 20.06  | 42.55  | 72.46  | 106.17 | 136.95 | 161.27 | 179.55 | 194.75 | 208.38 | 221.98 | 237.2  | 253.63 |
| Burkina Faso             | Male   | 0 | 0 | 0 | 0 | 0 | 0 | 1.7  | 12.11 | 35.6   | 69.09  | 104.16 | 135.8  | 160.31 | 176.13 | 186.61 | 195.49 | 204.3  | 212.33 | 222.14 | 231.71 |
| Burkina Faso             | Female | 0 | 0 | 0 | 0 | 0 | 0 | 2.16 | 16.04 | 49.2   | 99.93  | 156.04 | 208.71 | 250.83 | 280.58 | 300.6  | 315.96 | 329.59 | 342.71 | 358.35 | 372.47 |
| Burundi                  | Male   | 0 | 0 | 0 | 0 | 0 | 0 | 1.69 | 11.97 | 34.55  | 67.53  | 102.59 | 134.57 | 157.94 | 175.49 | 186.56 | 194.8  | 203.58 | 212.22 | 222.01 | 231.06 |
| Burundi                  | Female | 0 | 0 | 0 | 0 | 0 | 0 | 2.16 | 16    | 48.85  | 99.93  | 155.65 | 208.08 | 250.7  | 279.15 | 301.04 | 316.93 | 330.55 | 344.31 | 360.07 | 376.25 |
| Cabo Verde               | Male   | 0 | 0 | 0 | 0 | 0 | 0 | 1.71 | 12.16 | 35.69  | 69.19  | 104.32 | 136.27 | 160.11 | 176.55 | 186.8  | 195.95 | 205.15 | 212.74 | 222.56 | 231.19 |
| Cabo Verde               | Female | 0 | 0 | 0 | 0 | 0 | 0 | 2.18 | 16    | 49.49  | 100.12 | 156.8  | 209.25 | 252.16 | 281.1  | 300.83 | 316.65 | 330.53 | 342.66 | 358.23 | 372.24 |
| Cambodia                 | Male   | 0 | 0 | 0 | 0 | 0 | 0 | 0.11 | 0.68  | 1.5    | 2.5    | 3.8    | 5.21   | 6.85   | 8.48   | 10.11  | 12.07  | 14.49  | 17.54  | 22.22  | 27.99  |
| Cambodia                 | Female | 0 | 0 | 0 | 0 | 0 | 0 | 0.24 | 1.5   | 3.52   | 6      | 9.96   | 14.48  | 19.52  | 24.14  | 28.58  | 33.47  | 39.21  | 46.42  | 55.94  | 68.18  |
| Cameroon                 | Male   | 0 | 0 | 0 | 0 | 0 | 0 | 1.71 | 12.21 | 34.91  | 68.51  | 103.98 | 135.39 | 158.94 | 174.85 | 185.56 | 194.11 | 202.93 | 210.89 | 220.08 | 229.75 |
| Cameroon                 | Female | 0 | 0 | 0 | 0 | 0 | 0 | 2.16 | 15.97 | 48.8   | 99.79  | 155.22 | 207.61 | 250    | 278.73 | 298.96 | 314.34 | 328.79 | 341.19 | 356.77 | 372.32 |
| Canada                   | Male   | 0 | 0 | 0 | 0 | 0 | 0 | 4.77 | 29.56 | 69.18  | 130.81 | 227.19 | 347.29 | 449.93 | 500.28 | 518.38 | 524.39 | 523.3  | 520.6  | 519.38 | 516.22 |
| Canada                   | Female | 0 | 0 | 0 | 0 | 0 | 0 | 6.75 | 46.02 | 128.11 | 282    | 505.97 | 710.15 | 825.67 | 866.13 | 874.95 | 874.11 | 868.03 | 857.44 | 847.36 | 831.76 |
| Central African Republic | Male   | 0 | 0 | 0 | 0 | 0 | 0 | 1.69 | 11.96 | 34.84  | 67.98  | 102.7  | 133.57 | 157.36 | 173.08 | 184.17 | 193.46 | 203.21 | 211.08 | 220.76 | 230.6  |
| Central African Republic | Female | 0 | 0 | 0 | 0 | 0 | 0 | 2.19 | 16.01 | 48.68  | 98.9   | 154.53 | 207.17 | 248.92 | 278.37 | 298.85 | 312.83 | 327.59 | 340.41 | 355.69 | 370.99 |
| Chad                     | Male   | 0 | 0 | 0 | 0 | 0 | 0 | 1.7  | 11.93 | 35.31  | 68.75  | 103.75 | 135.19 | 159.35 | 175.21 | 186.25 | 194.26 | 203.44 | 211.26 | 220.08 | 230.21 |
| Chad                     | Female | 0 | 0 | 0 | 0 | 0 | 0 | 2.18 | 15.86 | 49.13  | 100.1  | 155.51 | 207.91 | 250.17 | 278.09 | 298.09 | 313.68 | 327.62 | 340.48 | 355.96 | 370.9  |
| Chile                    | Male   | 0 | 0 | 0 | 0 | 0 | 0 | 1.67 | 11.4  | 32.34  | 65.13  | 110.65 | 161.77 | 209.51 | 243.25 | 263.18 | 274.81 | 284.74 | 291.82 | 300.39 | 307.79 |
| Chile                    | Female | 0 | 0 | 0 | 0 | 0 | 0 | 3.9  | 29.81 | 99.58  | 227.09 | 389.36 | 539.84 | 637.93 | 686.39 | 707.56 | 716.7  | 722.19 | 722.33 | 723.1  | 722.41 |
| China                    | Male   | 0 | 0 | 0 | 0 | 0 | 0 | 0.75 | 5.25  | 15.42  | 32.88  | 57.89  | 89.62  | 122.24 | 148.72 | 168.48 | 184.31 | 199.25 | 212.64 | 226.21 | 238.19 |
| China                    | Female | 0 | 0 | 0 | 0 | 0 | 0 | 0.99 | 6.96  | 20.94  | 43.37  | 69.54  | 96.03  | 119.32 | 137.04 | 152.35 | 166.6  | 181.78 | 197.22 | 214.55 | 232.8  |
| Colombia                 | Male   | 0 | 0 | 0 | 0 | 0 | 0 | 0.64 | 4.58  | 13.79  | 28.61  | 47.88  | 67.79  | 84.07  | 95.99  | 105.21 | 113.16 | 121.72 | 129.98 | 139.74 | 151.16 |
| Colombia                 | Female | 0 | 0 | 0 | 0 | 0 | 0 | 0.82 | 5.84  | 18.8   | 42.38  | 74.66  | 108.83 | 136.9  | 159.08 | 175.16 | 188.4  | 200.47 | 212.71 | 228.26 | 245.49 |
| Comoros                  | Male   | 0 | 0 | 0 | 0 | 0 | 0 | 1.7  | 12.11 | 35.11  | 68.97  | 104.03 | 135.02 | 160.01 | 175.59 | 186.69 | 195.33 | 203.94 | 212.46 | 222.02 | 232.22 |
| Comoros                  | Female | 0 | 0 | 0 | 0 | 0 | 0 | 2.15 | 16.16 | 49.43  | 100.25 | 156.43 | 208.75 | 250.86 | 280.61 | 301.26 | 317.56 | 330.78 | 344.53 | 358.95 | 374.57 |
| Congo                    | Male   | 0 | 0 | 0 | 0 | 0 | 0 | 1.7  | 12.03 | 35.22  | 68.61  | 103.94 | 134.97 | 159.03 | 175.65 | 185.87 | 195.44 | 204.1  | 212.47 | 222.24 | 232    |
| Congo                    | Female | 0 | 0 | 0 | 0 | 0 | 0 | 2.13 | 15.87 | 48.9   | 99.11  | 154.71 | 207.04 | 248.59 | 278.22 | 298.85 | 314.48 | 327.59 | 340.9  | 355.92 | 371.68 |
| Costa Rica               | Male   | 0 | 0 | 0 | 0 | 0 | 0 | 0.64 | 4.46  | 13.42  | 28.59  | 48.02  | 67.47  | 83.38  | 95.62  | 105.01 | 112.85 | 121.2  | 129.27 | 139.28 | 150.41 |
| Costa Rica               | Female | 0 | 0 | 0 | 0 | 0 | 0 | 0.82 | 5.83  | 18.85  | 42.39  | 74.84  | 108.56 | 137.32 | 158.15 | 174.58 | 187.39 | 199.12 | 211.12 | 226.48 | 242.6  |
| Côte d'Ivoire            | Male   | 0 | 0 | 0 | 0 | 0 | 0 | 1.69 | 11.99 | 35.31  | 68.72  | 103.76 | 135.55 | 159.75 | 175.46 | 185.65 | 194.72 | 203.14 | 211.01 | 220.28 | 229.69 |

| Country                               | Gender | 2000 | 2001 | 2002 | 2003 | 2004 | 2005 | 2006 | 2007 | 2008  | 2009  | 2010   | 2011   | 2012   | 2013   | 2014   | 2015   | 2016   | 2017   | 2018   | 2019   | 2020   |
|---------------------------------------|--------|------|------|------|------|------|------|------|------|-------|-------|--------|--------|--------|--------|--------|--------|--------|--------|--------|--------|--------|
| Côte d'Ivoire                         | Female | 0    | 0    | 0    | 0    | 0    | 0    | 0    | 2.2  | 15.94 | 49.16 | 99.7   | 155.38 | 207.27 | 249.27 | 279.53 | 299.03 | 314.92 | 328.13 | 341.63 | 356.41 | 371.97 |
| Croatia                               | Male   | 0    | 0    | 0    | 0    | 0    | 0    | 0    | 0.91 | 6.4   | 19.11 | 39.34  | 65.23  | 92.67  | 116.24 | 133.04 | 144.81 | 154.02 | 162.41 | 170.85 | 179.51 | 188.32 |
| Croatia                               | Female | 0    | 0    | 0    | 0    | 0    | 0    | 0    | 0.97 | 6.71  | 20.23 | 42.54  | 72.61  | 105.84 | 136.59 | 160.35 | 178.2  | 192.41 | 204.12 | 214.63 | 226.54 | 241.18 |
| Cuba                                  | Male   | 0    | 0    | 0    | 0    | 0    | 0    | 0    | 0.57 | 3.95  | 10.73 | 21.66  | 35.2   | 49.27  | 61.93  | 71.87  | 79.83  | 87.23  | 95.37  | 104.06 | 113.89 | 124.58 |
| Cuba                                  | Female | 0    | 0    | 0    | 0    | 0    | 0    | 0    | 0.89 | 6.33  | 19.64 | 42.03  | 70.89  | 101.16 | 128.46 | 149.35 | 165.07 | 178.08 | 190.23 | 202.64 | 216.63 | 232.41 |
| Cyprus                                | Male   | 0    | 0    | 0    | 0    | 0    | 0    | 0    | 5.54 | 36.8  | 95.9  | 187.41 | 320.71 | 476.89 | 591.66 | 649.7  | 670.65 | 677.95 | 678.68 | 678.7  | 681.16 | 680.36 |
| Cyprus                                | Female | 0    | 0    | 0    | 0    | 0    | 0    | 0    | 3.06 | 20.85 | 61.35 | 133.72 | 234.74 | 342.48 | 425.87 | 475.6  | 503.07 | 518.35 | 526.55 | 530.14 | 535.97 | 538.99 |
| Czechia                               | Male   | 0    | 0    | 0    | 0    | 0    | 0    | 0    | 0.91 | 6.42  | 19.01 | 39.47  | 64.85  | 92.17  | 115.52 | 132.03 | 143.63 | 152.65 | 161.53 | 169.62 | 179.38 | 188.33 |
| Czechia                               | Female | 0    | 0    | 0    | 0    | 0    | 0    | 0    | 0.97 | 6.73  | 20.13 | 42.25  | 72.28  | 105.59 | 135.6  | 160.11 | 177.31 | 191.57 | 203.38 | 215.62 | 229.28 | 244.22 |
| Democratic People's Republic of Korea | Male   | 0    | 0    | 0    | 0    | 0    | 0    | 0    | 0.71 | 4.77  | 13.43 | 27.89  | 50.63  | 81.38  | 114.66 | 140    | 156.43 | 166.94 | 175.8  | 184.69 | 194.14 | 203.98 |
| Democratic People's Republic of Korea | Female | 0    | 0    | 0    | 0    | 0    | 0    | 0    | 0.98 | 6.73  | 20.13 | 40.64  | 65.43  | 89.84  | 110.35 | 125.78 | 137.58 | 147.35 | 158.01 | 169.71 | 184.1  | 200.66 |
| Democratic Republic of the Congo      | Male   | 0    | 0    | 0    | 0    | 0    | 0    | 0    | 1.71 | 11.86 | 35    | 68.46  | 103.64 | 134.36 | 157.48 | 173.84 | 183.98 | 194.17 | 203.28 | 212.6  | 222.07 | 230.9  |
| Democratic Republic of the Congo      | Female | 0    | 0    | 0    | 0    | 0    | 0    | 0    | 2.21 | 15.75 | 48.97 | 99.03  | 154.59 | 206.73 | 248.97 | 277.53 | 299.15 | 314.55 | 328.47 | 341.1  | 356.51 | 367.99 |
| Denmark                               | Male   | 0    | 0    | 0    | 0    | 0    | 0    | 0    | 4.08 | 26.21 | 67.07 | 129.27 | 219.32 | 330.65 | 421.27 | 472.03 | 496.83 | 507.39 | 514.03 | 518.53 | 522.86 | 525.25 |
| Denmark                               | Female | 0    | 0    | 0    | 0    | 0    | 0    | 0    | 3.97 | 28.58 | 85.59 | 187.34 | 330.13 | 476.55 | 580.96 | 635.98 | 664.22 | 678.27 | 684.65 | 687.84 | 687.95 | 687.04 |
| Djibouti                              | Male   | 0    | 0    | 0    | 0    | 0    | 0    | 0    | 1.7  | 12.11 | 35.18 | 68.8   | 104.1  | 136.06 | 160.02 | 176.35 | 187.09 | 196.04 | 204.21 | 212.49 | 221.45 | 231.8  |
| Djibouti                              | Female | 0    | 0    | 0    | 0    | 0    | 0    | 0    | 2.18 | 16.05 | 49.4  | 100.12 | 156.44 | 208.22 | 251.52 | 280.44 | 301.82 | 317.11 | 330.89 | 344.53 | 360.08 | 374.42 |
| Dominica                              | Male   | 0    | 0    | 0    | 0    | 0    | 0    | 0    | 0.57 | 3.94  | 10.95 | 21.55  | 34.89  | 49.04  | 61.47  | 71.43  | 79.32  | 86.59  | 94.87  | 103.85 | 114.71 | 126.05 |
| Dominica                              | Female | 0    | 0    | 0    | 0    | 0    | 0    | 0    | 0.89 | 6.26  | 19.47 | 42.28  | 70.76  | 101.33 | 127.87 | 148.79 | 164.71 | 178.19 | 192.03 | 206.32 | 223.18 | 243.75 |
| Dominican Republic                    | Male   | 0    | 0    | 0    | 0    | 0    | 0    | 0    | 0.57 | 3.9   | 10.9  | 21.64  | 35.07  | 49.38  | 62.25  | 72.48  | 80.48  | 88.1   | 96.64  | 105.64 | 116.38 | 127.73 |
| Dominican Republic                    | Female | 0    | 0    | 0    | 0    | 0    | 0    | 0    | 0.89 | 6.26  | 19.41 | 41.91  | 71.25  | 101.31 | 128.43 | 149.58 | 166.21 | 179.87 | 193.41 | 207.4  | 224.44 | 243.89 |
| Ecuador                               | Male   | 0    | 0    | 0    | 0    | 0    | 0    | 0    | 0.91 | 6.03  | 17.23 | 35.74  | 59.38  | 82.55  | 100.89 | 113.58 | 123.06 | 130.8  | 138.71 | 146.18 | 156.62 | 167.54 |
| Ecuador                               | Female | 0    | 0    | 0    | 0    | 0    | 0    | 0    | 2.56 | 17.65 | 53.3  | 123.7  | 222.47 | 317.12 | 379.71 | 412.56 | 431.81 | 444.55 | 455.38 | 463.64 | 474.06 | 487.65 |
| Egypt                                 | Male   | 0    | 0    | 0    | 0    | 0    | 0    | 0    | 0.78 | 5.18  | 14.01 | 27.11  | 42.65  | 57.39  | 69.76  | 79.29  | 86.12  | 92.02  | 98.49  | 104.91 | 112.59 | 120.57 |
| Egypt                                 | Female | 0    | 0    | 0    | 0    | 0    | 0    | 0    | 1.15 | 8.13  | 24.99 | 54.93  | 93.91  | 134.26 | 166.49 | 188.87 | 203.31 | 212.99 | 222.58 | 232.54 | 245.53 | 259.88 |
| El Salvador                           | Male   | 0    | 0    | 0    | 0    | 0    | 0    | 0    | 0.64 | 4.5   | 13.44 | 28.7   | 47.6   | 66.56  | 82.65  | 94.91  | 104.04 | 112.27 | 120.91 | 128.57 | 137.82 | 149.27 |



|                   |        |   |   |   |   |   |   |      |       |        |        |        |        |        |        |        |        |        |        |        |        |
|-------------------|--------|---|---|---|---|---|---|------|-------|--------|--------|--------|--------|--------|--------|--------|--------|--------|--------|--------|--------|
| El Salvador       | Female | 0 | 0 | 0 | 0 | 0 | 0 | 0.82 | 5.88  | 18.8   | 42.25  | 74.46  | 108.17 | 136.7  | 157.59 | 174.3  | 186.71 | 199.11 | 211.21 | 226.91 | 245.33 |
| Equatorial Guinea | Male   | 0 | 0 | 0 | 0 | 0 | 0 | 1.71 | 12.24 | 35.41  | 68.38  | 103.76 | 134.68 | 158.38 | 174.26 | 185.19 | 193.8  | 202.66 | 210.82 | 220.26 | 228.82 |
| Equatorial Guinea | Female | 0 | 0 | 0 | 0 | 0 | 0 | 2.15 | 15.94 | 48.69  | 99.16  | 154.75 | 207.36 | 249.7  | 278.32 | 298.42 | 312.93 | 325.28 | 337.9  | 351.84 | 366.63 |
| Eritrea           | Male   | 0 | 0 | 0 | 0 | 0 | 0 | 1.7  | 11.98 | 35.07  | 67.98  | 102.89 | 132.76 | 156.84 | 173.58 | 184.41 | 193.28 | 201.51 | 210.03 | 219.49 | 229.58 |
| Eritrea           | Female | 0 | 0 | 0 | 0 | 0 | 0 | 2.15 | 15.93 | 49.09  | 99.33  | 155.02 | 207.17 | 250.16 | 279.15 | 299.54 | 316.03 | 329.73 | 342.1  | 356.62 | 371.3  |
| Estonia           | Male   | 0 | 0 | 0 | 0 | 0 | 0 | 1.85 | 12.77 | 37.44  | 74.44  | 117.3  | 158.81 | 192.81 | 215.91 | 230.17 | 241.07 | 250.03 | 258.38 | 267.38 | 276.83 |
| Estonia           | Female | 0 | 0 | 0 | 0 | 0 | 0 | 2.52 | 18.68 | 59.14  | 126.26 | 209.71 | 293.29 | 361.76 | 409.59 | 438.46 | 454.76 | 466.62 | 477.11 | 489.63 | 503.58 |
| Eswatini          | Male   | 0 | 0 | 0 | 0 | 0 | 0 | 2.87 | 19.83 | 55.14  | 101.33 | 144.71 | 181.48 | 206.44 | 221.26 | 230.48 | 238.46 | 245.85 | 253.23 | 262.8  | 271.4  |
| Eswatini          | Female | 0 | 0 | 0 | 0 | 0 | 0 | 3.2  | 22.53 | 65.35  | 124.46 | 182.47 | 233.26 | 273.5  | 299.55 | 318.83 | 333.3  | 345.37 | 358.23 | 372.89 | 387.38 |
| Ethiopia          | Male   | 0 | 0 | 0 | 0 | 0 | 0 | 1.55 | 11.22 | 34.53  | 69.31  | 106.3  | 140.09 | 167.73 | 188.19 | 203.77 | 217.4  | 230.69 | 243.89 | 258.12 | 272.94 |
| Ethiopia          | Female | 0 | 0 | 0 | 0 | 0 | 0 | 1.95 | 14.58 | 47.11  | 99.54  | 158.36 | 214.33 | 260.85 | 296.51 | 324.46 | 347.17 | 367.91 | 388.4  | 410.38 | 432.49 |
| Fiji              | Male   | 0 | 0 | 0 | 0 | 0 | 0 | 0.26 | 1.6   | 3.72   | 6.61   | 11.07  | 16.54  | 22.65  | 28.47  | 32.95  | 38.17  | 43.93  | 50.65  | 58.71  | 68.12  |
| Fiji              | Female | 0 | 0 | 0 | 0 | 0 | 0 | 0.46 | 2.98  | 7.49   | 14.57  | 23.48  | 33.8   | 43.58  | 52.35  | 59.42  | 66.81  | 75.62  | 85.62  | 98.67  | 113.85 |
| Finland           | Male   | 0 | 0 | 0 | 0 | 0 | 0 | 1.02 | 6.22  | 15.11  | 28.73  | 49.17  | 75.66  | 102.52 | 122.99 | 136.64 | 145.4  | 152.67 | 159.61 | 167.39 | 175.81 |
| Finland           | Female | 0 | 0 | 0 | 0 | 0 | 0 | 2.98 | 20.49 | 59.59  | 129.34 | 226.83 | 331.69 | 413.8  | 463.03 | 491.45 | 506.18 | 515.03 | 519.7  | 525.63 | 532.17 |
| France            | Male   | 0 | 0 | 0 | 0 | 0 | 0 | 2.3  | 14.59 | 36.77  | 70.65  | 118.9  | 179.62 | 237.51 | 276.36 | 297.79 | 309.71 | 318.23 | 322.67 | 328.08 | 333.48 |
| France            | Female | 0 | 0 | 0 | 0 | 0 | 0 | 3.03 | 20.94 | 61.4   | 132.87 | 235.25 | 343.58 | 428.25 | 479.72 | 507.68 | 524.94 | 534.62 | 537.45 | 541    | 540.57 |
| Gabon             | Male   | 0 | 0 | 0 | 0 | 0 | 0 | 1.69 | 12.1  | 35.1   | 68.33  | 103.53 | 134.46 | 158.98 | 174.28 | 185.51 | 193.72 | 203.27 | 211.75 | 221.16 | 231.26 |
| Gabon             | Female | 0 | 0 | 0 | 0 | 0 | 0 | 2.17 | 15.82 | 48.79  | 98.85  | 154.47 | 206.76 | 249.52 | 279.51 | 299.87 | 315.92 | 329.02 | 342    | 357.23 | 372.81 |
| Gambia            | Male   | 0 | 0 | 0 | 0 | 0 | 0 | 1.71 | 12.24 | 35.21  | 68.95  | 104.71 | 136.07 | 159.96 | 177.06 | 187.17 | 195.38 | 205.25 | 212.93 | 221.8  | 231.75 |
| Gambia            | Female | 0 | 0 | 0 | 0 | 0 | 0 | 2.16 | 15.97 | 48.57  | 98.96  | 155.11 | 206.65 | 248.95 | 279.21 | 298.99 | 313.77 | 327.63 | 341.04 | 356.33 | 370.91 |
| Germany           | Male   | 0 | 0 | 0 | 0 | 0 | 0 | 1.12 | 7.13  | 17.37  | 32.44  | 55.18  | 84.72  | 114.65 | 137.33 | 152.31 | 162.61 | 170.93 | 177.84 | 185.68 | 193.36 |
| Germany           | Female | 0 | 0 | 0 | 0 | 0 | 0 | 2.4  | 16.35 | 47.17  | 99.92  | 175.07 | 258.03 | 326.45 | 371.01 | 397.24 | 412.59 | 422.95 | 429.32 | 435.38 | 443.51 |
| Ghana             | Male   | 0 | 0 | 0 | 0 | 0 | 0 | 1.69 | 12.06 | 35.14  | 69.14  | 104.42 | 135.94 | 159.61 | 175.84 | 187.26 | 195.45 | 204.62 | 212.63 | 222.41 | 232.26 |
| Ghana             | Female | 0 | 0 | 0 | 0 | 0 | 0 | 2.17 | 16.1  | 49.22  | 100.43 | 156.15 | 208.19 | 251.01 | 280.33 | 301.27 | 317.18 | 330.92 | 345.55 | 360.89 | 375.65 |
| Greece            | Male   | 0 | 0 | 0 | 0 | 0 | 0 | 0.8  | 4.89  | 11.74  | 22.46  | 38.51  | 59.16  | 80.67  | 99.09  | 110.65 | 119.46 | 127.12 | 133.78 | 141.79 | 151.13 |
| Greece            | Female | 0 | 0 | 0 | 0 | 0 | 0 | 1.46 | 9.8   | 27.29  | 57.02  | 99.54  | 148.04 | 191.71 | 223.39 | 245.51 | 260.78 | 272.84 | 282.6  | 294.05 | 307.43 |
| Greenland         | Male   | 0 | 0 | 0 | 0 | 0 | 0 | 4.74 | 29.73 | 69.05  | 130.26 | 225.22 | 344.2  | 444.72 | 495.06 | 511.13 | 514.09 | 514.14 | 512.93 | 511.45 | 505.93 |
| Greenland         | Female | 0 | 0 | 0 | 0 | 0 | 0 | 6.74 | 45.54 | 127.05 | 279.98 | 501.01 | 705.24 | 815.67 | 855.67 | 860.99 | 857.02 | 848.04 | 837.37 | 825.7  | 807.06 |
| Grenada           | Male   | 0 | 0 | 0 | 0 | 0 | 0 | 0.57 | 3.92  | 10.92  | 21.39  | 35.1   | 49.45  | 61.9   | 71.2   | 79.24  | 86.43  | 95.17  | 103.91 | 114.26 | 126.07 |

| Country                    | Sex    | 2000 | 2001 | 2002 | 2003 | 2004 | 2005 | 2006 | 2007  | 2008   | 2009   | 2010   | 2011   | 2012   | 2013   | 2014   | 2015   | 2016   | 2017   | 2018   | 2019   | 2020 |
|----------------------------|--------|------|------|------|------|------|------|------|-------|--------|--------|--------|--------|--------|--------|--------|--------|--------|--------|--------|--------|------|
| Grenada                    | Female | 0    | 0    | 0    | 0    | 0    | 0    | 0.89 | 6.38  | 19.68  | 41.9   | 70.39  | 101.35 | 127.45 | 148.6  | 164.76 | 177.72 | 191.64 | 205.72 | 222.65 | 242.12 |      |
| Guam                       | Male   | 0    | 0    | 0    | 0    | 0    | 0    | 0.26 | 1.61  | 3.73   | 6.75   | 10.99  | 16.79  | 23.17  | 29.06  | 34.19  | 39.27  | 45.4   | 52.15  | 59.82  | 69.25  |      |
| Guam                       | Female | 0    | 0    | 0    | 0    | 0    | 0    | 0.46 | 2.98  | 7.54   | 14.65  | 23.75  | 34.38  | 44.38  | 53.27  | 60.91  | 68.41  | 77.47  | 86.74  | 99.56  | 113.92 |      |
| Guatemala                  | Male   | 0    | 0    | 0    | 0    | 0    | 0    | 0.64 | 4.47  | 13.51  | 28.49  | 47.49  | 66.67  | 82.88  | 94.9   | 103.93 | 111.77 | 120.42 | 128.12 | 138.01 | 149.32 |      |
| Guatemala                  | Female | 0    | 0    | 0    | 0    | 0    | 0    | 0.82 | 5.82  | 18.57  | 42.39  | 73.72  | 107.9  | 135.67 | 156.48 | 173.2  | 185.18 | 197.12 | 209.27 | 224.98 | 241.81 |      |
| Guinea                     | Male   | 0    | 0    | 0    | 0    | 0    | 0    | 1.7  | 12.04 | 35.32  | 69.17  | 104.35 | 135.89 | 159.87 | 175.86 | 186.61 | 195.44 | 204.04 | 211.78 | 222.14 | 230.75 |      |
| Guinea                     | Female | 0    | 0    | 0    | 0    | 0    | 0    | 2.14 | 16.07 | 48.84  | 99.75  | 155.59 | 207.84 | 249.87 | 279.31 | 299.36 | 314.86 | 328.3  | 342.3  | 357.77 | 373.61 |      |
| Guinea-Bissau              | Male   | 0    | 0    | 0    | 0    | 0    | 0    | 1.71 | 12.06 | 35.3   | 68.66  | 104.14 | 135.75 | 159.72 | 175.63 | 186.51 | 195.49 | 203.96 | 212.26 | 222.31 | 231.75 |      |
| Guinea-Bissau              | Female | 0    | 0    | 0    | 0    | 0    | 0    | 2.19 | 16.16 | 48.9   | 99.43  | 155.33 | 208.18 | 250.46 | 279.16 | 298.78 | 314.67 | 329.3  | 342.22 | 357.75 | 373.32 |      |
| Guyana                     | Male   | 0    | 0    | 0    | 0    | 0    | 0    | 0.57 | 3.91  | 10.82  | 21.36  | 34.6   | 48.56  | 61.09  | 70.64  | 78.39  | 86.08  | 94.69  | 103.96 | 114.48 | 126.1  |      |
| Guyana                     | Female | 0    | 0    | 0    | 0    | 0    | 0    | 0.89 | 6.28  | 19.47  | 41.77  | 69.87  | 100.01 | 126.31 | 147.1  | 162.32 | 176.88 | 189.84 | 204.22 | 221.72 | 240.63 |      |
| Haiti                      | Male   | 0    | 0    | 0    | 0    | 0    | 0    | 0.57 | 3.9   | 10.84  | 21.46  | 34.63  | 48.95  | 61.86  | 71.46  | 79.44  | 87.04  | 95.48  | 104.7  | 114.58 | 126.4  |      |
| Haiti                      | Female | 0    | 0    | 0    | 0    | 0    | 0    | 0.89 | 6.26  | 19.47  | 41.36  | 70.21  | 99.81  | 126.97 | 147.54 | 163.34 | 176.18 | 190.39 | 204.55 | 222.15 | 241.73 |      |
| Honduras                   | Male   | 0    | 0    | 0    | 0    | 0    | 0    | 0.64 | 4.49  | 13.56  | 28.76  | 47.83  | 67.1   | 83.01  | 95.72  | 104.72 | 112.93 | 121.23 | 129.03 | 139.53 | 151.37 |      |
| Honduras                   | Female | 0    | 0    | 0    | 0    | 0    | 0    | 0.82 | 5.92  | 18.78  | 42.38  | 74.32  | 107.63 | 135.85 | 157.27 | 172.75 | 186.26 | 198.43 | 210.66 | 225.72 | 243.87 |      |
| Hungary                    | Male   | 0    | 0    | 0    | 0    | 0    | 0    | 0.91 | 6.41  | 19.02  | 39.51  | 65.5   | 92.45  | 116.01 | 133.25 | 144.46 | 154.12 | 162.67 | 171.84 | 180.87 | 190.3  |      |
| Hungary                    | Female | 0    | 0    | 0    | 0    | 0    | 0    | 0.97 | 6.62  | 20.26  | 42.56  | 72.41  | 105.55 | 136.75 | 160.67 | 178.99 | 192.77 | 205.53 | 217.93 | 231.15 | 247.55 |      |
| Iceland                    | Male   | 0    | 0    | 0    | 0    | 0    | 0    | 6.64 | 41.71 | 98.45  | 182.89 | 339.97 | 565.14 | 724.8  | 797.38 | 817.81 | 823.03 | 822.13 | 819.5  | 818.32 | 813.7  |      |
| Iceland                    | Female | 0    | 0    | 0    | 0    | 0    | 0    | 6.3  | 46.11 | 131.93 | 272.36 | 488.4  | 720.25 | 864.66 | 930.14 | 955.94 | 965.13 | 963.83 | 957.09 | 950.42 | 940.39 |      |
| India                      | Male   | 0    | 0    | 0    | 0    | 0    | 0    | 0.66 | 4.41  | 12.22  | 24.07  | 38.76  | 54.34  | 69.09  | 81.42  | 92.16  | 103.23 | 115.82 | 129.2  | 145.43 | 162.38 |      |
| India                      | Female | 0    | 0    | 0    | 0    | 0    | 0    | 0.98 | 6.88  | 21.1   | 44.74  | 74.06  | 105.18 | 134.21 | 158.41 | 179.53 | 199.06 | 219.95 | 241.12 | 265.72 | 292.1  |      |
| Indonesia                  | Male   | 0    | 0    | 0    | 0    | 0    | 0    | 0.15 | 0.93  | 2.01   | 3.33   | 4.84   | 6.86   | 8.85   | 10.8   | 12.96  | 15.73  | 19.53  | 24.3   | 30.63  | 38.69  |      |
| Indonesia                  | Female | 0    | 0    | 0    | 0    | 0    | 0    | 0.28 | 1.81  | 4.11   | 7.31   | 11.57  | 16.85  | 22.39  | 27.85  | 33.28  | 39.64  | 48.11  | 58.23  | 71.39  | 87.13  |      |
| Iran (Islamic Republic of) | Male   | 0    | 0    | 0    | 0    | 0    | 0    | 0.93 | 6.46  | 18.36  | 35.92  | 55.9   | 75.64  | 91.5   | 104.36 | 114.68 | 123.32 | 134.11 | 144.19 | 157.88 | 181.14 |      |
| Iran (Islamic Republic of) | Female | 0    | 0    | 0    | 0    | 0    | 0    | 1.7  | 12.89 | 43.5   | 98.17  | 167.09 | 232.74 | 281.32 | 316.02 | 340.42 | 357.38 | 372.12 | 384.44 | 405.11 | 435.68 |      |
| Irap                       | Male   | 0    | 0    | 0    | 0    | 0    | 0    | 0.78 | 5.08  | 13.93  | 26.89  | 42.22  | 56.8   | 68.97  | 78.48  | 85.41  | 91.27  | 97.67  | 103.74 | 110.99 | 119.08 |      |
| Irap                       | Female | 0    | 0    | 0    | 0    | 0    | 0    | 1.15 | 8.04  | 24.68  | 54.45  | 93.54  | 133.23 | 165.11 | 187.79 | 201.69 | 212.49 | 222.22 | 231.86 | 244.29 | 258.18 |      |
| Ireland                    | Male   | 0    | 0    | 0    | 0    | 0    | 0    | 2.81 | 17.93 | 45.52  | 86.82  | 146.96 | 221.43 | 288.99 | 332.32 | 354.13 | 364.56 | 371.97 | 376.73 | 384.84 | 390.41 |      |
| Ireland                    | Female | 0    | 0    | 0    | 0    | 0    | 0    | 3.06 | 20.93 | 61.52  | 133.19 | 234.8  | 342.69 | 426.16 | 475.52 | 502.97 | 518.64 | 529.27 | 534.91 | 540.82 | 548.35 |      |
| Israel                     | Male   | 0    | 0    | 0    | 0    | 0    | 0    | 4.13 | 27.2  | 69.95  | 134.86 | 228.87 | 344.66 | 438.47 | 493.24 | 518.06 | 528.9  | 534.32 | 538.56 | 542.94 | 547.1  |      |

|                                  |        |   |   |   |   |   |   |      |       |       |        |        |        |        |        |        |        |        |        |        |        |
|----------------------------------|--------|---|---|---|---|---|---|------|-------|-------|--------|--------|--------|--------|--------|--------|--------|--------|--------|--------|--------|
| Israel                           | Female | 0 | 0 | 0 | 0 | 0 | 0 | 4.02 | 28.13 | 85.06 | 186.26 | 330.04 | 476.95 | 580.12 | 636.93 | 665.29 | 679.03 | 685.68 | 687.93 | 692.76 | 694.42 |
| Italy                            | Male   | 0 | 0 | 0 | 0 | 0 | 0 | 1.62 | 11.3  | 33.07 | 67.51  | 112.1  | 162.17 | 208.78 | 244.87 | 270.42 | 288.58 | 301.67 | 312.88 | 324.61 | 336    |
| Italy                            | Female | 0 | 0 | 0 | 0 | 0 | 0 | 2.16 | 16.27 | 53.51 | 120.8  | 208.45 | 298.35 | 373.22 | 427.84 | 465.11 | 490.87 | 506.46 | 517.55 | 531.01 | 545.76 |
| Jamaica                          | Male   | 0 | 0 | 0 | 0 | 0 | 0 | 0.57 | 3.97  | 10.89 | 21.66  | 35.05  | 49.36  | 61.82  | 72.12  | 79.93  | 87.18  | 95.54  | 104.99 | 115.86 | 128    |
| Jamaica                          | Female | 0 | 0 | 0 | 0 | 0 | 0 | 0.89 | 6.4   | 19.47 | 41.98  | 70.49  | 101.3  | 127.98 | 148.81 | 164.35 | 178.31 | 192.8  | 207.15 | 224.3  | 244.33 |
| Japan                            | Male   | 0 | 0 | 0 | 0 | 0 | 0 | 0.74 | 5.14  | 15.1  | 32.07  | 55.86  | 85.59  | 117.29 | 145.72 | 169.13 | 188    | 204.3  | 217.94 | 232.96 | 247.54 |
| Japan                            | Female | 0 | 0 | 0 | 0 | 0 | 0 | 3.04 | 25.41 | 94.47 | 226.52 | 388.92 | 537.11 | 642.77 | 705.2  | 738.79 | 757.49 | 768.02 | 774.86 | 782.19 | 788.4  |
| Jordan                           | Male   | 0 | 0 | 0 | 0 | 0 | 0 | 0.78 | 5.15  | 14.15 | 27.27  | 42.33  | 57.25  | 70.13  | 79.15  | 86.57  | 91.99  | 97.81  | 104.35 | 111.75 | 120.03 |
| Jordan                           | Female | 0 | 0 | 0 | 0 | 0 | 0 | 1.15 | 8.01  | 24.92 | 54.7   | 94.15  | 134.12 | 166.46 | 189.71 | 204.1  | 214.68 | 223.59 | 233.18 | 246.53 | 260.88 |
| Kazakhstan                       | Male   | 0 | 0 | 0 | 0 | 0 | 0 | 1.32 | 9.47  | 28.32 | 58.04  | 93.75  | 129.13 | 160.77 | 184.96 | 201.34 | 213.72 | 223.9  | 232.93 | 241.7  | 249.63 |
| Kazakhstan                       | Female | 0 | 0 | 0 | 0 | 0 | 0 | 1.97 | 14.8  | 49.85 | 113.63 | 195.24 | 277.23 | 345.8  | 390    | 418.49 | 436.09 | 448.68 | 459.36 | 471.24 | 484.92 |
| Kenya                            | Male   | 0 | 0 | 0 | 0 | 0 | 0 | 1.55 | 11.27 | 34.52 | 69.33  | 106.08 | 139.51 | 166.88 | 186.72 | 201.82 | 214.99 | 228.35 | 241.41 | 256.09 | 270.72 |
| Kenya                            | Female | 0 | 0 | 0 | 0 | 0 | 0 | 1.95 | 14.54 | 46.89 | 99.03  | 157.64 | 213.33 | 260.28 | 296.24 | 323.83 | 347.02 | 368.7  | 389.41 | 411.81 | 434.35 |
| Kuwait                           | Male   | 0 | 0 | 0 | 0 | 0 | 0 | 0.78 | 5.21  | 13.89 | 27.07  | 42.45  | 57.33  | 69.46  | 79     | 85.73  | 91.03  | 97.73  | 104.19 | 111.63 | 119.09 |
| Kuwait                           | Female | 0 | 0 | 0 | 0 | 0 | 0 | 1.15 | 7.95  | 24.74 | 54.56  | 94.44  | 134.03 | 166.66 | 188.87 | 204.29 | 214.73 | 224.34 | 233.78 | 245.84 | 260.56 |
| Kyrgyzstan                       | Male   | 0 | 0 | 0 | 0 | 0 | 0 | 1.33 | 9.4   | 28.42 | 58.52  | 94.47  | 130.8  | 162.32 | 187.34 | 204.83 | 217.43 | 227.43 | 236.25 | 244.95 | 252.96 |
| Kyrgyzstan                       | Female | 0 | 0 | 0 | 0 | 0 | 0 | 1.96 | 14.9  | 49.68 | 114.15 | 195.75 | 279.7  | 349.62 | 395.57 | 423.6  | 442.32 | 453.78 | 465.1  | 478.48 | 492.03 |
| Lao People's Democratic Republic | Male   | 0 | 0 | 0 | 0 | 0 | 0 | 0.11 | 0.68  | 1.5   | 2.52   | 3.78   | 5.21   | 6.86   | 8.48   | 10.1   | 12.08  | 14.64  | 17.9   | 22.53  | 28.7   |
| Lao People's Democratic Republic | Female | 0 | 0 | 0 | 0 | 0 | 0 | 0.24 | 1.51  | 3.5   | 6.15   | 9.84   | 14.37  | 19.53  | 24.28  | 28.64  | 33.35  | 39.73  | 47.2   | 57.01  | 69.53  |
| Latvia                           | Male   | 0 | 0 | 0 | 0 | 0 | 0 | 1.85 | 12.91 | 37.15 | 74.11  | 117.08 | 158.65 | 192.22 | 214.91 | 229.7  | 240.42 | 249.81 | 258.06 | 267.42 | 275.15 |
| Latvia                           | Female | 0 | 0 | 0 | 0 | 0 | 0 | 2.55 | 18.82 | 59.58 | 125.42 | 209.37 | 292.65 | 361.39 | 407.6  | 435.83 | 453.59 | 464.99 | 473.95 | 487.76 | 501.79 |
| Lebanon                          | Male   | 0 | 0 | 0 | 0 | 0 | 0 | 0.78 | 5.19  | 14.1  | 27.1   | 42.51  | 57.05  | 68.96  | 78.25  | 85.01  | 90.73  | 96.8   | 102.9  | 110.36 | 118.26 |
| Lebanon                          | Female | 0 | 0 | 0 | 0 | 0 | 0 | 1.15 | 8.04  | 24.85 | 54.29  | 93.86  | 133.49 | 166.24 | 188.49 | 202.23 | 212.96 | 221.01 | 230.14 | 242.42 | 255.08 |
| Lesotho                          | Male   | 0 | 0 | 0 | 0 | 0 | 0 | 2.83 | 19.75 | 55.17 | 101.67 | 145.19 | 181.86 | 207.23 | 223.26 | 232.28 | 239.71 | 247.45 | 255.1  | 264.42 | 272.68 |
| Lesotho                          | Female | 0 | 0 | 0 | 0 | 0 | 0 | 3.2  | 22.62 | 65.26 | 123.96 | 181.69 | 233.22 | 272.01 | 299.28 | 318.51 | 333.18 | 345.95 | 357.49 | 371.38 | 386.44 |
| Liberia                          | Male   | 0 | 0 | 0 | 0 | 0 | 0 | 1.7  | 11.94 | 34.99 | 68.2   | 102.67 | 133.74 | 157.59 | 172.96 | 184.24 | 192.84 | 202.46 | 211.13 | 220.49 | 230.05 |
| Liberia                          | Female | 0 | 0 | 0 | 0 | 0 | 0 | 2.17 | 15.73 | 48.86 | 98.64  | 153.62 | 205.46 | 246.71 | 275.81 | 295.65 | 310.83 | 324.76 | 338.15 | 352.87 | 366.96 |
| Libya                            | Male   | 0 | 0 | 0 | 0 | 0 | 0 | 0.78 | 5.14  | 14.06 | 27.03  | 42.35  | 56.96  | 69.53  | 78.66  | 85.21  | 91.15  | 96.71  | 102.55 | 110.16 | 118.25 |

|                                  |        |   |   |   |   |   |   |      |       |       |        |        |        |        |        |        |        |        |        |        |        |
|----------------------------------|--------|---|---|---|---|---|---|------|-------|-------|--------|--------|--------|--------|--------|--------|--------|--------|--------|--------|--------|
| Libya                            | Female | 0 | 0 | 0 | 0 | 0 | 0 | 1.15 | 8.01  | 24.95 | 54.34  | 93.57  | 133.12 | 165.93 | 187.89 | 202.09 | 212.35 | 221.51 | 231.2  | 243.4  | 257.26 |
| Lithuania                        | Male   | 0 | 0 | 0 | 0 | 0 | 0 | 0.98 | 6.72  | 18.39 | 36.07  | 56.86  | 78.55  | 98.01  | 112.7  | 123.74 | 132.87 | 141.48 | 149.62 | 158.85 | 169.18 |
| Lithuania                        | Female | 0 | 0 | 0 | 0 | 0 | 0 | 1.64 | 11.43 | 34.41 | 71.35  | 117.76 | 167.44 | 212.43 | 246.35 | 270.33 | 286.72 | 298.46 | 310.16 | 325.75 | 340.9  |
| Luxembourg                       | Male   | 0 | 0 | 0 | 0 | 0 | 0 | 2.78 | 17.96 | 45.7  | 86.98  | 146.85 | 221.52 | 287.67 | 330.25 | 351.99 | 363.15 | 368.98 | 374.79 | 377.58 | 381.85 |
| Luxembourg                       | Female | 0 | 0 | 0 | 0 | 0 | 0 | 3.04 | 20.75 | 61.26 | 132.78 | 234.21 | 341.22 | 424.67 | 473.65 | 501.56 | 515.69 | 524.59 | 528.15 | 532.68 | 535.91 |
| Madagascar                       | Male   | 0 | 0 | 0 | 0 | 0 | 0 | 1.7  | 11.98 | 35.44 | 68.77  | 103.77 | 135.76 | 160.09 | 176.06 | 187.32 | 195.61 | 203.97 | 213.16 | 222.46 | 232.23 |
| Madagascar                       | Female | 0 | 0 | 0 | 0 | 0 | 0 | 2.17 | 16.04 | 49.45 | 99.74  | 155.62 | 207.77 | 250.38 | 279.26 | 300.02 | 315.81 | 330.02 | 343.54 | 358.67 | 373.53 |
| Malawi                           | Male   | 0 | 0 | 0 | 0 | 0 | 0 | 1.7  | 11.98 | 34.93 | 68.42  | 103.25 | 134.98 | 158.75 | 174.9  | 185.8  | 194.18 | 202.13 | 211.26 | 219.73 | 229.79 |
| Malawi                           | Female | 0 | 0 | 0 | 0 | 0 | 0 | 2.15 | 15.94 | 48.96 | 98.78  | 154.48 | 207.13 | 251.03 | 279.6  | 300.4  | 315.68 | 330.13 | 343.3  | 358.47 | 372.36 |
| Malaysia                         | Male   | 0 | 0 | 0 | 0 | 0 | 0 | 0.11 | 0.68  | 1.5   | 2.52   | 3.81   | 5.13   | 6.92   | 8.47   | 10.19  | 12.12  | 14.62  | 17.84  | 22.31  | 28.22  |
| Malaysia                         | Female | 0 | 0 | 0 | 0 | 0 | 0 | 0.24 | 1.5   | 3.49  | 6.08   | 10.06  | 14.51  | 19.58  | 24.04  | 28.61  | 33.35  | 39.4   | 46.58  | 56.37  | 68.41  |
| Maldives                         | Male   | 0 | 0 | 0 | 0 | 0 | 0 | 0.11 | 0.68  | 1.51  | 2.53   | 3.83   | 5.28   | 6.92   | 8.51   | 10.27  | 12.21  | 14.63  | 17.98  | 22.5   | 28.35  |
| Maldives                         | Female | 0 | 0 | 0 | 0 | 0 | 0 | 0.24 | 1.51  | 3.5   | 6.07   | 9.98   | 14.55  | 19.38  | 24.31  | 28.71  | 33.73  | 39.99  | 46.53  | 56.26  | 68.61  |
| Mali                             | Male   | 0 | 0 | 0 | 0 | 0 | 0 | 1.7  | 12.14 | 35.21 | 68.82  | 104.32 | 136.38 | 160.82 | 176.46 | 187.06 | 195.77 | 204.88 | 212.69 | 222.38 | 231.08 |
| Mali                             | Female | 0 | 0 | 0 | 0 | 0 | 0 | 2.2  | 15.95 | 48.94 | 99.89  | 155.6  | 207.93 | 250.61 | 279.26 | 299.79 | 314.75 | 328.94 | 341.26 | 355.52 | 371.07 |
| Malta                            | Male   | 0 | 0 | 0 | 0 | 0 | 0 | 2.77 | 18.1  | 45.46 | 86.92  | 147.03 | 221.92 | 288.98 | 332.57 | 354.24 | 365.42 | 371.39 | 377.22 | 383.75 | 389.77 |
| Malta                            | Female | 0 | 0 | 0 | 0 | 0 | 0 | 3.05 | 20.88 | 61.81 | 133.3  | 234.62 | 341.77 | 425.37 | 475.82 | 501.89 | 518.46 | 528.59 | 534.4  | 541.44 | 548.67 |
| Marshall Islands                 | Male   | 0 | 0 | 0 | 0 | 0 | 0 | 0.26 | 1.61  | 3.77  | 6.64   | 10.86  | 16.55  | 22.73  | 28.43  | 33.47  | 38.4   | 44.9   | 50.86  | 59.36  | 68.68  |
| Marshall Islands                 | Female | 0 | 0 | 0 | 0 | 0 | 0 | 0.46 | 2.93  | 7.5   | 14.36  | 23.66  | 33.48  | 43.39  | 51.89  | 59.53  | 66.96  | 75.64  | 85.71  | 97.8   | 112.74 |
| Mauritania                       | Male   | 0 | 0 | 0 | 0 | 0 | 0 | 1.69 | 12.16 | 35.49 | 69.09  | 104.9  | 136.36 | 161.2  | 177.2  | 188.5  | 197.18 | 205.99 | 214.21 | 223.9  | 233.76 |
| Mauritania                       | Female | 0 | 0 | 0 | 0 | 0 | 0 | 2.16 | 16.04 | 49.45 | 100.48 | 156.44 | 209.11 | 251.68 | 280.73 | 302.02 | 316.85 | 330.56 | 343.9  | 359.64 | 375.06 |
| Mauritius                        | Male   | 0 | 0 | 0 | 0 | 0 | 0 | 0.11 | 0.68  | 1.49  | 2.5    | 3.79   | 5.17   | 6.74   | 8.47   | 9.95   | 11.9   | 14.51  | 17.71  | 22.01  | 27.83  |
| Mauritius                        | Female | 0 | 0 | 0 | 0 | 0 | 0 | 0.24 | 1.5   | 3.47  | 6.09   | 10     | 14.52  | 19.15  | 23.85  | 28.17  | 33.34  | 39.49  | 46.8   | 55.85  | 68.17  |
| Mexico                           | Male   | 0 | 0 | 0 | 0 | 0 | 0 | 1.68 | 13.56 | 49.11 | 117    | 197.71 | 265.24 | 308.41 | 333.36 | 349.1  | 361.21 | 372.66 | 383.62 | 396.83 | 407.79 |
| Mexico                           | Female | 0 | 0 | 0 | 0 | 0 | 0 | 1.69 | 13.74 | 52.19 | 131.32 | 233.72 | 325.77 | 389.44 | 428.68 | 455.39 | 475.33 | 493.12 | 509.77 | 529.22 | 548.12 |
| Micronesia (Federated States of) | Male   | 0 | 0 | 0 | 0 | 0 | 0 | 0.26 | 1.62  | 3.76  | 6.63   | 11.16  | 16.68  | 22.94  | 28.52  | 33.94  | 38.88  | 45.07  | 51.57  | 59.96  | 69.64  |
| Micronesia (Federated States of) | Female | 0 | 0 | 0 | 0 | 0 | 0 | 0.46 | 3     | 7.53  | 14.54  | 23.59  | 33.83  | 43.72  | 52.29  | 60.02  | 67.7   | 76.51  | 86.35  | 98.65  | 113.6  |
| Mongolia                         | Male   | 0 | 0 | 0 | 0 | 0 | 0 | 1.32 | 9.35  | 28.45 | 58.12  | 93.4   | 129.25 | 161.47 | 185.81 | 202.91 | 215.76 | 226.07 | 234.03 | 242.15 | 251    |

|                          |        |   |   |   |   |   |   |      |       |        |        |        |        |        |        |        |        |        |        |        |        |
|--------------------------|--------|---|---|---|---|---|---|------|-------|--------|--------|--------|--------|--------|--------|--------|--------|--------|--------|--------|--------|
| Mongolia                 | Female | 0 | 0 | 0 | 0 | 0 | 0 | 1.96 | 14.86 | 50.01  | 113.87 | 196.03 | 281.13 | 350    | 395.64 | 423.96 | 442.64 | 452.76 | 464.45 | 476.83 | 488.57 |
| Montenegro               | Male   | 0 | 0 | 0 | 0 | 0 | 0 | 0.91 | 6.41  | 18.89  | 39.74  | 65.81  | 93.21  | 116.43 | 133.69 | 146.11 | 155.29 | 164.62 | 173.7  | 182.9  | 192.66 |
| Montenegro               | Female | 0 | 0 | 0 | 0 | 0 | 0 | 0.97 | 6.67  | 20.12  | 42.73  | 72.62  | 105.57 | 136.77 | 161.23 | 178.81 | 193.25 | 206.8  | 220.66 | 235.04 | 251.4  |
| Morocco                  | Male   | 0 | 0 | 0 | 0 | 0 | 0 | 0.78 | 5.22  | 14.04  | 27.23  | 42.26  | 57.28  | 69.72  | 79.02  | 85.85  | 91.95  | 97.46  | 104.74 | 111.97 | 119.67 |
| Morocco                  | Female | 0 | 0 | 0 | 0 | 0 | 0 | 1.14 | 8     | 24.83  | 54.79  | 93.53  | 133.43 | 166.34 | 188.31 | 203.15 | 214.05 | 223.4  | 233.08 | 244.97 | 258.56 |
| Mozambique               | Male   | 0 | 0 | 0 | 0 | 0 | 0 | 1.7  | 11.93 | 34.77  | 67.64  | 102.21 | 133.78 | 157.24 | 173.56 | 183.72 | 192.06 | 200.59 | 208.32 | 218.62 | 227.83 |
| Mozambique               | Female | 0 | 0 | 0 | 0 | 0 | 0 | 2.14 | 15.68 | 48.94  | 98.71  | 154.35 | 206.67 | 248.7  | 277.65 | 298.44 | 314.55 | 327.3  | 340.87 | 355.94 | 370.07 |
| Myanmar                  | Male   | 0 | 0 | 0 | 0 | 0 | 0 | 0.11 | 0.68  | 1.51   | 2.5    | 3.84   | 5.26   | 6.84   | 8.47   | 10.01  | 12.07  | 14.59  | 17.72  | 22.22  | 28.3   |
| Myanmar                  | Female | 0 | 0 | 0 | 0 | 0 | 0 | 0.24 | 1.5   | 3.55   | 6.08   | 9.87   | 14.62  | 19.56  | 24.11  | 28.67  | 32.93  | 39.38  | 46.24  | 55.62  | 67.9   |
| Namibia                  | Male   | 0 | 0 | 0 | 0 | 0 | 0 | 2.86 | 20.18 | 56.01  | 102.28 | 147.29 | 182.37 | 208.64 | 223.29 | 233.05 | 240.99 | 248.2  | 255.49 | 264.32 | 272.96 |
| Namibia                  | Female | 0 | 0 | 0 | 0 | 0 | 0 | 3.21 | 22.71 | 65.98  | 124.78 | 183.87 | 234.45 | 274.56 | 302.06 | 321.32 | 335.83 | 348.37 | 359.83 | 373.85 | 388.09 |
| Nepal                    | Male   | 0 | 0 | 0 | 0 | 0 | 0 | 0.61 | 4.11  | 11.21  | 22.26  | 36.34  | 50.98  | 65.24  | 76.51  | 85.2   | 93.36  | 102.76 | 111.89 | 122.89 | 133.93 |
| Nepal                    | Female | 0 | 0 | 0 | 0 | 0 | 0 | 0.97 | 6.75  | 20.36  | 42.49  | 70.73  | 100.51 | 128.1  | 150.18 | 166.91 | 181.82 | 196.41 | 210.13 | 229.51 | 247.32 |
| Netherlands              | Male   | 0 | 0 | 0 | 0 | 0 | 0 | 2.1  | 13.44 | 33.25  | 62.37  | 104.01 | 154.68 | 202.03 | 235.25 | 253.04 | 264.45 | 271.83 | 277.84 | 284.72 | 291.03 |
| Netherlands              | Female | 0 | 0 | 0 | 0 | 0 | 0 | 2.23 | 15.46 | 43.86  | 92.9   | 161.01 | 236.22 | 297.2  | 339.12 | 362.32 | 378.72 | 389.43 | 395.87 | 401.01 | 407.27 |
| New Zealand              | Male   | 0 | 0 | 0 | 0 | 0 | 0 | 1.46 | 10.44 | 32.58  | 69.78  | 117.45 | 168.8  | 216.05 | 252.79 | 278.79 | 297.75 | 312.17 | 323.52 | 336.48 | 345.62 |
| New Zealand              | Female | 0 | 0 | 0 | 0 | 0 | 0 | 3.15 | 26.37 | 100.18 | 245.58 | 427.58 | 594.38 | 707.59 | 769.81 | 803.51 | 818.14 | 824.08 | 823.15 | 822.22 | 819.02 |
| Nicaragua                | Male   | 0 | 0 | 0 | 0 | 0 | 0 | 0.64 | 4.5   | 13.46  | 28.72  | 47.69  | 66.93  | 83.47  | 95.35  | 104.85 | 113.17 | 121.69 | 129.34 | 139.84 | 151.12 |
| Nicaragua                | Female | 0 | 0 | 0 | 0 | 0 | 0 | 0.82 | 5.92  | 18.75  | 42.46  | 74.51  | 107.78 | 136.85 | 158    | 174.2  | 187.26 | 199.24 | 211.39 | 227.01 | 244.26 |
| Niger                    | Male   | 0 | 0 | 0 | 0 | 0 | 0 | 1.71 | 12.21 | 35.41  | 69.01  | 104.78 | 135.98 | 160.45 | 176.6  | 187.85 | 197.48 | 205.67 | 213.17 | 222.89 | 233.04 |
| Niger                    | Female | 0 | 0 | 0 | 0 | 0 | 0 | 2.15 | 15.9  | 49.13  | 100.22 | 155.82 | 208.61 | 251.24 | 280.06 | 300.82 | 316.27 | 330.07 | 343.81 | 358.3  | 372.9  |
| Nigeria                  | Male   | 0 | 0 | 0 | 0 | 0 | 0 | 1.55 | 11.28 | 34.66  | 69.7   | 106.84 | 140.67 | 168.01 | 187.81 | 203.05 | 216.52 | 230.64 | 244.33 | 259.54 | 274.38 |
| Nigeria                  | Female | 0 | 0 | 0 | 0 | 0 | 0 | 1.95 | 14.54 | 46.94  | 99.1   | 157.89 | 213.45 | 259.79 | 295.3  | 322.78 | 345.86 | 368.02 | 389.89 | 413.89 | 437.64 |
| North Macedonia          | Male   | 0 | 0 | 0 | 0 | 0 | 0 | 0.91 | 6.39  | 19.09  | 39.57  | 65.76  | 92.93  | 116.93 | 134    | 144.89 | 154.81 | 164.03 | 172.8  | 182.4  | 191.46 |
| North Macedonia          | Female | 0 | 0 | 0 | 0 | 0 | 0 | 0.97 | 6.79  | 20.13  | 42.79  | 72.8   | 105.84 | 136.17 | 160.25 | 178.12 | 192.33 | 205.29 | 218.75 | 233.63 | 250.09 |
| Northern Mariana Islands | Male   | 0 | 0 | 0 | 0 | 0 | 0 | 0.26 | 1.6   | 3.72   | 6.63   | 11.04  | 16.71  | 23.06  | 28.55  | 33.99  | 39.2   | 45     | 51.66  | 59.53  | 68.49  |
| Northern Mariana Islands | Female | 0 | 0 | 0 | 0 | 0 | 0 | 0.46 | 3.02  | 7.55   | 14.58  | 23.68  | 34.18  | 44.13  | 52.51  | 60.57  | 67.68  | 76.68  | 86.22  | 97.77  | 111.79 |
| Norway                   | Male   | 0 | 0 | 0 | 0 | 0 | 0 | 2.37 | 17.05 | 51.08  | 106.77 | 178.68 | 258.31 | 328.84 | 377.58 | 407.24 | 424.82 | 436.39 | 444.52 | 452.35 | 457.04 |
| Norway                   | Female | 0 | 0 | 0 | 0 | 0 | 0 | 3.58 | 28.38 | 99.19  | 231.28 | 397.93 | 556.84 | 672.83 | 742.54 | 782.23 | 803.35 | 813.06 | 813.06 | 811.06 | 806.22 |
| Oman                     | Male   | 0 | 0 | 0 | 0 | 0 | 0 | 0.78 | 5.23  | 14.06  | 27.19  | 42.72  | 57.36  | 69.6   | 78.28  | 85.08  | 90.26  | 95.98  | 102.79 | 109.79 | 118.52 |

| Country             | Gender | 2000 | 2001 | 2002 | 2003 | 2004 | 2005 | 2006 | 2007 | 2008  | 2009   | 2010   | 2011   | 2012   | 2013   | 2014    | 2015    | 2016   | 2017    | 2018    | 2019    | 2020    |
|---------------------|--------|------|------|------|------|------|------|------|------|-------|--------|--------|--------|--------|--------|---------|---------|--------|---------|---------|---------|---------|
| Oman                | Female | 0    | 0    | 0    | 0    | 0    | 0    | 0    | 1.15 | 8.13  | 24.77  | 54.79  | 94.19  | 133.94 | 166.28 | 187.42  | 201.69  | 211.73 | 220.21  | 230.13  | 242.01  | 256.07  |
| Pakistan            | Male   | 0    | 0    | 0    | 0    | 0    | 0    | 0    | 0.66 | 4.43  | 12.27  | 24.18  | 38.92  | 54.77  | 69.76  | 82.67   | 93.42   | 104.98 | 117.99  | 130.91  | 146.14  | 162.95  |
| Pakistan            | Female | 0    | 0    | 0    | 0    | 0    | 0    | 0    | 0.98 | 6.84  | 21.19  | 44.96  | 74.4   | 106.04 | 135.47 | 160.6   | 181.91  | 202.51 | 223.19  | 245.98  | 270.77  | 296.16  |
| Palestine           | Male   | 0    | 0    | 0    | 0    | 0    | 0    | 0    | 0.78 | 5.07  | 13.85  | 27.03  | 42.07  | 56.59  | 68.93  | 78.05   | 84.74   | 90.88  | 96.68   | 103.66  | 111.07  | 119.7   |
| Palestine           | Female | 0    | 0    | 0    | 0    | 0    | 0    | 0    | 1.15 | 8.04  | 24.85  | 54.46  | 93.54  | 133.23 | 165.71 | 187.92  | 202.15  | 212.76 | 221.69  | 232.76  | 245.06  | 259.17  |
| Panama              | Male   | 0    | 0    | 0    | 0    | 0    | 0    | 0    | 0.64 | 4.45  | 13.57  | 28.64  | 47.81  | 67.64  | 83.86  | 95.37   | 104.74  | 113.02 | 121.04  | 129.54  | 139.3   | 150.57  |
| Panama              | Female | 0    | 0    | 0    | 0    | 0    | 0    | 0    | 0.82 | 5.86  | 18.83  | 42.75  | 74.49  | 107.81 | 137.1  | 158.03  | 174.32  | 187.46 | 199.69  | 211.81  | 227.6   | 244.77  |
| Papua New Guinea    | Male   | 0    | 0    | 0    | 0    | 0    | 0    | 0    | 0.26 | 1.61  | 3.76   | 6.44   | 10.94  | 16.7   | 22.91  | 28.67   | 33.78   | 38.96  | 44.96   | 51.63   | 59.97   | 69.45   |
| Papua New Guinea    | Female | 0    | 0    | 0    | 0    | 0    | 0    | 0    | 0.46 | 2.97  | 7.58   | 14.45  | 23.61  | 33.74  | 43.89  | 52.18   | 59.65   | 67.13  | 75.83   | 84.81   | 96.84   | 111.31  |
| Paraguay            | Male   | 0    | 0    | 0    | 0    | 0    | 0    | 0    | 0.57 | 3.97  | 10.98  | 21.56  | 34.84  | 49.62  | 62.25  | 72.23   | 80.04   | 87.77  | 95.93   | 105.57  | 115.59  | 127.45  |
| Paraguay            | Female | 0    | 0    | 0    | 0    | 0    | 0    | 0    | 0.89 | 6.3   | 19.44  | 41.82  | 71.01  | 101.19 | 128.58 | 148.73  | 165.11  | 178.4  | 191.45  | 204.91  | 221.6   | 240.86  |
| Peru                | Male   | 0    | 0    | 0    | 0    | 0    | 0    | 0    | 0.55 | 3.85  | 10.76  | 22.22  | 36.68  | 52.42  | 66.04  | 76.5    | 84.7    | 91.79  | 100.04  | 108.36  | 118.14  | 130.54  |
| Peru                | Female | 0    | 0    | 0    | 0    | 0    | 0    | 0    | 0.91 | 6.48  | 20.27  | 44.81  | 77.95  | 112.74 | 142.4  | 165.32  | 181.86  | 195.48 | 208.04  | 220.01  | 234.8   | 253.32  |
| Philippines         | Male   | 0    | 0    | 0    | 0    | 0    | 0    | 0    | 0.15 | 0.93  | 2.01   | 3.31   | 4.86   | 6.82   | 8.83   | 10.82   | 13.05   | 15.87  | 19.78   | 24.65   | 31.09   | 39.25   |
| Philippines         | Female | 0    | 0    | 0    | 0    | 0    | 0    | 0    | 0.28 | 1.8   | 4.08   | 7.28   | 11.56  | 16.8   | 22.48  | 27.86   | 33.47   | 40.1   | 48.85   | 59.33   | 72.92   | 89.13   |
| Poland              | Male   | 0    | 0    | 0    | 0    | 0    | 0    | 0    | 0.94 | 6.62  | 20.07  | 42.02  | 69.12  | 96.83  | 121.97 | 141.83  | 158.16  | 172.73 | 187.02  | 200.74  | 215.45  | 229.65  |
| Poland              | Female | 0    | 0    | 0    | 0    | 0    | 0    | 0    | 0.97 | 6.9   | 21.42  | 46     | 77.1   | 111.34 | 143.86 | 171.97  | 195.33  | 216.5  | 236.65  | 256.07  | 277.52  | 300.31  |
| Portugal            | Male   | 0    | 0    | 0    | 0    | 0    | 0    | 0    | 1.94 | 12.14 | 30.02  | 57.11  | 96.19  | 145.92 | 194.32 | 227.75  | 247.7   | 259.32 | 267.68  | 274.21  | 282.33  | 290.29  |
| Portugal            | Female | 0    | 0    | 0    | 0    | 0    | 0    | 0    | 3.93 | 27.51 | 82.66  | 180.79 | 319.94 | 460.9  | 561.53 | 617.64  | 643.9   | 657.57 | 664.31  | 666.41  | 671.49  | 675.46  |
| Puerto Rico         | Male   | 0    | 0    | 0    | 0    | 0    | 0    | 0    | 0.57 | 3.9   | 10.81  | 21.59  | 35.06  | 49.16  | 62.02  | 71.28   | 79.27   | 86.89  | 95.45   | 104.22  | 114.57  | 125.62  |
| Puerto Rico         | Female | 0    | 0    | 0    | 0    | 0    | 0    | 0    | 0.89 | 6.35  | 19.71  | 42.01  | 70.9   | 100.91 | 127.97 | 148.89  | 164.56  | 178.05 | 191.68  | 205.49  | 222.09  | 240.15  |
| Qatar               | Male   | 0    | 0    | 0    | 0    | 0    | 0    | 0    | 0.78 | 5.23  | 14.08  | 27.16  | 42.44  | 56.75  | 68.71  | 77.27   | 84.28   | 89.89  | 95.44   | 101.62  | 108.68  | 116.49  |
| Qatar               | Female | 0    | 0    | 0    | 0    | 0    | 0    | 0    | 1.14 | 7.93  | 25.1   | 54.37  | 93.53  | 131.71 | 163.26 | 184.77  | 198.69  | 208.43 | 216.81  | 225.42  | 238.42  | 251.7   |
| Republic of Korea   | Male   | 0    | 0    | 0    | 0    | 0    | 0    | 0    | 0.92 | 6.17  | 17.38  | 36.69  | 65.78  | 103.27 | 142.26 | 174.24  | 195.77  | 209.05 | 217.84  | 225.41  | 234.55  | 243.52  |
| Republic of Korea   | Female | 0    | 0    | 0    | 0    | 0    | 0    | 0    | 5.4  | 43.78 | 155.3  | 366.47 | 626.27 | 843.99 | 966.23 | 1018.92 | 1033.18 | 1035.4 | 1028.89 | 1020.91 | 1013.39 | 1005.98 |
| Republic of Moldova | Male   | 0    | 0    | 0    | 0    | 0    | 0    | 0    | 1.86 | 12.9  | 37.23  | 74.31  | 117.48 | 158.9  | 192.43 | 215.56  | 230.61  | 242.06 | 251.21  | 259.18  | 268.26  | 277.22  |
| Republic of Moldova | Female | 0    | 0    | 0    | 0    | 0    | 0    | 0    | 2.6  | 18.66 | 59.13  | 125.67 | 208.96 | 292.14 | 361.59 | 407.77  | 435.84  | 453.72 | 464.67  | 475.92  | 490.38  | 504.93  |
| Romania             | Male   | 0    | 0    | 0    | 0    | 0    | 0    | 0    | 0.91 | 6.39  | 18.97  | 39.72  | 65.54  | 93.1   | 116.88 | 134.2   | 146.32  | 155.82 | 165.71  | 175     | 185.02  | 195.1   |
| Romania             | Female | 0    | 0    | 0    | 0    | 0    | 0    | 0    | 0.97 | 6.69  | 20.24  | 42.82  | 72.78  | 106.17 | 137.76 | 161.62  | 180.27  | 194.68 | 208.61  | 222.98  | 238.81  | 254.8   |
| Russian Federation  | Male   | 0    | 0    | 0    | 0    | 0    | 0    | 0    | 3.97 | 32.89 | 116.95 | 257.82 | 405.29 | 515.99 | 583.73 | 618.76  | 637.11  | 653.62 | 666.4   | 677.06  | 679.24  | 677.85  |

|                                     |        |   |   |   |   |   |   |      |       |        |        |        |        |        |        |        |        |        |        |        |        |
|-------------------------------------|--------|---|---|---|---|---|---|------|-------|--------|--------|--------|--------|--------|--------|--------|--------|--------|--------|--------|--------|
| Russian Federation                  | Female | 0 | 0 | 0 | 0 | 0 | 0 | 4.15 | 36.18 | 135.99 | 320.6  | 533.5  | 710.75 | 827.88 | 893.01 | 928.51 | 950.21 | 960.99 | 972.2  | 980.61 | 986.84 |
| Rwanda                              | Male   | 0 | 0 | 0 | 0 | 0 | 0 | 1.7  | 12.02 | 34.73  | 68.34  | 103.14 | 134.78 | 158.83 | 174.94 | 185.98 | 194.49 | 203.28 | 211.21 | 220.86 | 230.9  |
| Rwanda                              | Female | 0 | 0 | 0 | 0 | 0 | 0 | 2.18 | 15.93 | 49.07  | 99.58  | 155.28 | 208.1  | 249.88 | 279.17 | 300.48 | 316.3  | 329.04 | 342.46 | 358    | 372.58 |
| Saint Lucia                         | Male   | 0 | 0 | 0 | 0 | 0 | 0 | 0.57 | 3.94  | 10.93  | 21.54  | 34.76  | 49.51  | 61.83  | 71.79  | 79.26  | 86.7   | 95.08  | 103.76 | 114.46 | 125.97 |
| Saint Lucia                         | Female | 0 | 0 | 0 | 0 | 0 | 0 | 0.89 | 6.36  | 19.36  | 41.92  | 70.39  | 100.38 | 126.57 | 147.71 | 162.93 | 177.11 | 190.2  | 204.18 | 220.95 | 240.16 |
| Saint Vincent and the<br>Grenadines | Male   | 0 | 0 | 0 | 0 | 0 | 0 | 0.57 | 3.97  | 10.78  | 21.5   | 34.95  | 49.39  | 61.74  | 71.73  | 79.76  | 86.9   | 95.65  | 104.67 | 115.2  | 126.95 |
| Saint Vincent and the<br>Grenadines | Female | 0 | 0 | 0 | 0 | 0 | 0 | 0.89 | 6.39  | 19.52  | 42     | 70.51  | 101.02 | 127.83 | 147.83 | 164.45 | 177.21 | 190.47 | 205.53 | 223.07 | 242.9  |
| Samoa                               | Male   | 0 | 0 | 0 | 0 | 0 | 0 | 0.26 | 1.62  | 3.75   | 6.57   | 11.17  | 16.73  | 23.09  | 28.96  | 33.76  | 39.07  | 44.84  | 51.41  | 59.79  | 69.43  |
| Samoa                               | Female | 0 | 0 | 0 | 0 | 0 | 0 | 0.46 | 2.97  | 7.55   | 14.51  | 23.93  | 34.06  | 44.11  | 52.33  | 59.82  | 67.83  | 76.1   | 85.51  | 97.78  | 112.52 |
| Sao Tome and Principe               | Male   | 0 | 0 | 0 | 0 | 0 | 0 | 1.7  | 12.04 | 35.22  | 69.22  | 104.56 | 135.78 | 159.77 | 175.57 | 185.87 | 194.23 | 202.23 | 209.63 | 218.1  | 227.13 |
| Sao Tome and Principe               | Female | 0 | 0 | 0 | 0 | 0 | 0 | 2.19 | 16.12 | 49.39  | 100.16 | 156.66 | 208.84 | 250.78 | 279.46 | 299.82 | 314.47 | 327.76 | 341.04 | 355.36 | 369.55 |
| Saudi Arabia                        | Male   | 0 | 0 | 0 | 0 | 0 | 0 | 2.3  | 16.66 | 51.32  | 105.5  | 159.94 | 202.32 | 227.12 | 241.28 | 248.34 | 252.68 | 256.92 | 261.14 | 266.42 | 270.27 |
| Saudi Arabia                        | Female | 0 | 0 | 0 | 0 | 0 | 0 | 2.3  | 17.27 | 57.44  | 132.54 | 229.61 | 314.7  | 369.49 | 398.47 | 411.85 | 419.67 | 424.5  | 429.28 | 436.67 | 445.81 |
| Senegal                             | Male   | 0 | 0 | 0 | 0 | 0 | 0 | 1.69 | 12.08 | 35.52  | 69.07  | 104.35 | 135.94 | 159.45 | 175.58 | 186.08 | 194.45 | 203.95 | 211.62 | 219.9  | 230.1  |
| Senegal                             | Female | 0 | 0 | 0 | 0 | 0 | 0 | 2.21 | 15.98 | 49.21  | 99.53  | 156.18 | 208.1  | 249.84 | 278.85 | 298.72 | 314.57 | 327.21 | 341.37 | 354.98 | 370.57 |
| Serbia                              | Male   | 0 | 0 | 0 | 0 | 0 | 0 | 0.91 | 6.36  | 18.84  | 39.51  | 65.25  | 92.56  | 116.49 | 133.31 | 145.32 | 154.95 | 164.14 | 173.02 | 182.39 | 192.56 |
| Serbia                              | Female | 0 | 0 | 0 | 0 | 0 | 0 | 0.97 | 6.74  | 20.03  | 42.57  | 72.45  | 105.93 | 136.1  | 160.58 | 178.64 | 193.02 | 205.32 | 219.25 | 234.6  | 250.1  |
| Seychelles                          | Male   | 0 | 0 | 0 | 0 | 0 | 0 | 0.11 | 0.68  | 1.51   | 2.48   | 3.82   | 5.27   | 6.81   | 8.4    | 10.05  | 11.81  | 14.48  | 17.52  | 22.01  | 28.11  |
| Seychelles                          | Female | 0 | 0 | 0 | 0 | 0 | 0 | 0.24 | 1.49  | 3.52   | 6.14   | 10.04  | 14.51  | 19.38  | 24.34  | 28.29  | 33.09  | 39.27  | 46.67  | 56.41  | 68.44  |
| Sierra Leone                        | Male   | 0 | 0 | 0 | 0 | 0 | 0 | 1.7  | 11.95 | 35.29  | 68.43  | 103.97 | 135.57 | 159.53 | 175.78 | 186.24 | 195.83 | 204.59 | 212.38 | 221.98 | 231.78 |
| Sierra Leone                        | Female | 0 | 0 | 0 | 0 | 0 | 0 | 2.16 | 16.07 | 49.16  | 99.65  | 155.49 | 208.14 | 250.02 | 279.66 | 299.7  | 314.29 | 328.56 | 342.48 | 357.87 | 372.03 |
| Singapore                           | Male   | 0 | 0 | 0 | 0 | 0 | 0 | 0.84 | 5.53  | 15.26  | 32.11  | 56.94  | 89.39  | 124.49 | 153.54 | 174.61 | 188    | 198.54 | 206.78 | 216.54 | 226.18 |
| Singapore                           | Female | 0 | 0 | 0 | 0 | 0 | 0 | 4.26 | 35.06 | 123.94 | 289.92 | 497.43 | 681.47 | 796.99 | 851.12 | 871.68 | 877.12 | 877.17 | 874.92 | 877.81 | 879.94 |
| Slovakia                            | Male   | 0 | 0 | 0 | 0 | 0 | 0 | 0.91 | 6.44  | 19.14  | 39.26  | 65.34  | 92.67  | 115.84 | 133.52 | 145.03 | 153.98 | 163.22 | 172.46 | 182.06 | 192.33 |
| Slovakia                            | Female | 0 | 0 | 0 | 0 | 0 | 0 | 0.97 | 6.73  | 20.25  | 42.75  | 72.62  | 105.91 | 136.62 | 161    | 179.81 | 194.86 | 206.82 | 219.65 | 234.9  | 250.74 |
| Slovenia                            | Male   | 0 | 0 | 0 | 0 | 0 | 0 | 0.91 | 6.31  | 18.94  | 39.58  | 65.54  | 92.89  | 116.63 | 133.71 | 144.85 | 154.75 | 163.41 | 171.16 | 179.55 | 188.1  |
| Slovenia                            | Female | 0 | 0 | 0 | 0 | 0 | 0 | 0.97 | 6.62  | 20.25  | 42.71  | 72.64  | 106.06 | 136.66 | 161.13 | 178.82 | 193.15 | 205.11 | 216.04 | 228.86 | 242.65 |
| Solomon Islands                     | Male   | 0 | 0 | 0 | 0 | 0 | 0 | 0.26 | 1.62  | 3.72   | 6.66   | 11.07  | 16.72  | 23.1   | 28.66  | 34.1   | 38.98  | 44.99  | 51.68  | 59.74  | 69.29  |

| Country              | Gender | 2000 | 2001 | 2002 | 2003 | 2004 | 2005 | 2006 | 2007 | 2008  | 2009  | 2010   | 2011   | 2012   | 2013   | 2014   | 2015   | 2016   | 2017   | 2018   | 2019   | 2020   |
|----------------------|--------|------|------|------|------|------|------|------|------|-------|-------|--------|--------|--------|--------|--------|--------|--------|--------|--------|--------|--------|
| Solomon Islands      | Female | 0    | 0    | 0    | 0    | 0    | 0    | 0    | 0.46 | 2.97  | 7.52  | 14.45  | 23.68  | 33.89  | 43.89  | 52.56  | 60.06  | 68.01  | 76.6   | 86.26  | 97.63  | 112.14 |
| Somalia              | Male   | 0    | 0    | 0    | 0    | 0    | 0    | 0    | 1.7  | 11.95 | 35.03 | 68.54  | 103.54 | 134.66 | 158.38 | 175.01 | 186.14 | 194.63 | 203.11 | 212.15 | 220.64 | 231.32 |
| Somalia              | Female | 0    | 0    | 0    | 0    | 0    | 0    | 0    | 2.16 | 15.87 | 48.83 | 99.15  | 154.91 | 206.73 | 249.01 | 278.82 | 298.8  | 314.69 | 329.31 | 342.07 | 356.95 | 373.25 |
| South Africa         | Male   | 0    | 0    | 0    | 0    | 0    | 0    | 0    | 2.36 | 17.3  | 52.23 | 101.16 | 148.37 | 187.69 | 217.31 | 237.56 | 251.95 | 264.76 | 276.97 | 288.92 | 302.26 | 316.2  |
| South Africa         | Female | 0    | 0    | 0    | 0    | 0    | 0    | 0    | 2.61 | 19.41 | 60.42 | 121.24 | 184.27 | 240.3  | 285.08 | 318.88 | 345.49 | 367.43 | 388.03 | 408.03 | 429.14 | 451.19 |
| South Sudan          | Male   | 0    | 0    | 0    | 0    | 0    | 0    | 0    | 1.7  | 11.87 | 35.07 | 67.88  | 102.51 | 133.52 | 157    | 172.93 | 182.74 | 190.92 | 200.07 | 207.48 | 217.26 | 226.89 |
| South Sudan          | Female | 0    | 0    | 0    | 0    | 0    | 0    | 0    | 2.13 | 16.07 | 48.97 | 99.14  | 153.97 | 204.73 | 246.47 | 272.73 | 290.26 | 304.65 | 319.39 | 333.31 | 348.18 | 363.51 |
| Spain                | Male   | 0    | 0    | 0    | 0    | 0    | 0    | 0    | 2.13 | 13.89 | 36.4  | 71.89  | 127.6  | 201.89 | 269.53 | 313.23 | 336.64 | 347.25 | 354.25 | 360.88 | 366.8  | 374.28 |
| Spain                | Female | 0    | 0    | 0    | 0    | 0    | 0    | 0    | 3.25 | 23.46 | 73.99 | 180.41 | 350.55 | 532.35 | 652.59 | 711.46 | 735.41 | 746.08 | 750.53 | 749.35 | 749.3  | 753.36 |
| Sri Lanka            | Male   | 0    | 0    | 0    | 0    | 0    | 0    | 0    | 0.11 | 0.68  | 1.5   | 2.49   | 3.84   | 5.2    | 6.95   | 8.39   | 10.01  | 11.89  | 14.37  | 17.56  | 22.08  | 27.63  |
| Sri Lanka            | Female | 0    | 0    | 0    | 0    | 0    | 0    | 0    | 0.24 | 1.51  | 3.52  | 6.14   | 9.92   | 14.47  | 19.49  | 24.32  | 28.33  | 33.1   | 38.98  | 46.58  | 55.62  | 67.83  |
| Sudan                | Male   | 0    | 0    | 0    | 0    | 0    | 0    | 0    | 0.78 | 5.08  | 14.08 | 26.95  | 42.43  | 57.53  | 69.71  | 79.2   | 85.74  | 91.88  | 97.73  | 103.88 | 111.74 | 119.56 |
| Sudan                | Female | 0    | 0    | 0    | 0    | 0    | 0    | 0    | 1.15 | 7.96  | 24.65 | 54.53  | 94.17  | 134.14 | 166.68 | 188.94 | 203.2  | 213.31 | 222.2  | 232.15 | 244.72 | 258.29 |
| Suriname             | Male   | 0    | 0    | 0    | 0    | 0    | 0    | 0    | 0.57 | 3.91  | 10.87 | 21.46  | 34.96  | 48.91  | 61.8   | 71.82  | 79.27  | 87.03  | 95.04  | 104.02 | 114.59 | 125.83 |
| Suriname             | Female | 0    | 0    | 0    | 0    | 0    | 0    | 0    | 0.89 | 6.26  | 19.44 | 41.83  | 70.52  | 100.44 | 127.5  | 148.05 | 163.18 | 177.29 | 190.56 | 204.11 | 220.49 | 240.07 |
| Sweden               | Male   | 0    | 0    | 0    | 0    | 0    | 0    | 0    | 1.23 | 8.34  | 23.76 | 48.57  | 80.9   | 118.59 | 155.88 | 186.05 | 208.53 | 224.91 | 239.39 | 252.31 | 263.59 | 275.42 |
| Sweden               | Female | 0    | 0    | 0    | 0    | 0    | 0    | 0    | 1.44 | 10.23 | 32.26 | 69.72  | 119.18 | 173.33 | 222.84 | 261.29 | 290.78 | 313.95 | 333.45 | 348.8  | 362.92 | 376.08 |
| Switzerland          | Male   | 0    | 0    | 0    | 0    | 0    | 0    | 0    | 2.79 | 18    | 45.65 | 87.01  | 146.93 | 222.63 | 288.82 | 332.16 | 354.23 | 365.81 | 372.39 | 376.18 | 380.78 | 385.12 |
| Switzerland          | Female | 0    | 0    | 0    | 0    | 0    | 0    | 0    | 3.03 | 20.95 | 61.4  | 132.62 | 234.44 | 342.2  | 426.49 | 478.32 | 506.32 | 521.83 | 529.61 | 531.65 | 534.17 | 537.93 |
| Syrian Arab Republic | Male   | 0    | 0    | 0    | 0    | 0    | 0    | 0    | 0.78 | 5.14  | 13.97 | 27.19  | 42.27  | 57.11  | 69.71  | 78.77  | 85.46  | 91.94  | 97.29  | 102.26 | 108.98 | 116.92 |
| Syrian Arab Republic | Female | 0    | 0    | 0    | 0    | 0    | 0    | 0    | 1.14 | 7.94  | 24.78 | 54.86  | 94.28  | 133.8  | 165.69 | 188.35 | 203.03 | 212.46 | 220.76 | 228.96 | 239.08 | 251.86 |
| Tajikistan           | Male   | 0    | 0    | 0    | 0    | 0    | 0    | 0    | 1.32 | 9.43  | 28.4  | 58.1   | 93.41  | 129.93 | 162.27 | 185.85 | 203.25 | 216.49 | 226.57 | 235.21 | 244.01 | 252.49 |
| Tajikistan           | Female | 0    | 0    | 0    | 0    | 0    | 0    | 0    | 1.97 | 14.81 | 50.1  | 113.81 | 195.95 | 279.95 | 348.41 | 393.74 | 421.49 | 440.75 | 452.25 | 463.24 | 476.07 | 490.56 |
| Thailand             | Male   | 0    | 0    | 0    | 0    | 0    | 0    | 0    | 0.11 | 0.68  | 1.5   | 2.5    | 3.83   | 5.19   | 6.87   | 8.45   | 10.18  | 12.12  | 14.74  | 18     | 22.75  | 28.62  |
| Thailand             | Female | 0    | 0    | 0    | 0    | 0    | 0    | 0    | 0.24 | 1.51  | 3.5   | 6.18   | 9.99   | 14.81  | 19.56  | 24.42  | 28.77  | 33.77  | 40.09  | 47.47  | 57.25  | 69.98  |
| Timor-Leste          | Male   | 0    | 0    | 0    | 0    | 0    | 0    | 0    | 0.11 | 0.68  | 1.51  | 2.5    | 3.81   | 5.1    | 6.75   | 8.35   | 10.04  | 12.04  | 14.35  | 17.45  | 22.11  | 28.15  |
| Timor-Leste          | Female | 0    | 0    | 0    | 0    | 0    | 0    | 0    | 0.24 | 1.52  | 3.54  | 6.13   | 10.04  | 14.5   | 19.51  | 23.98  | 28.41  | 33.3   | 39.21  | 46.47  | 56.24  | 68.27  |
| Togo                 | Male   | 0    | 0    | 0    | 0    | 0    | 0    | 0    | 1.7  | 12.13 | 35.45 | 69.14  | 104.05 | 135.83 | 159.88 | 175.69 | 186.96 | 195.79 | 205.35 | 212.86 | 222.16 | 232.09 |
| Togo                 | Female | 0    | 0    | 0    | 0    | 0    | 0    | 0    | 2.2  | 15.93 | 49.07 | 99.9   | 155.75 | 208.38 | 250.95 | 280.89 | 301    | 316.6  | 330.54 | 343.43 | 358.98 | 373.77 |
| Tonga                | Male   | 0    | 0    | 0    | 0    | 0    | 0    | 0    | 0.26 | 1.62  | 3.73  | 6.51   | 11.14  | 16.76  | 23.32  | 28.79  | 33.93  | 39.41  | 45.23  | 51.74  | 60.65  | 70.03  |



| Country                      | Sex    | 2000 | 2001 | 2002 | 2003 | 2004 | 2005 | 2006 | 2007 | 2008  | 2009   | 2010   | 2011   | 2012   | 2013   | 2014    | 2015    | 2016    | 2017    | 2018    | 2019    | 2020    |
|------------------------------|--------|------|------|------|------|------|------|------|------|-------|--------|--------|--------|--------|--------|---------|---------|---------|---------|---------|---------|---------|
| Tonga                        | Female | 0    | 0    | 0    | 0    | 0    | 0    | 0    | 0.46 | 2.96  | 7.67   | 14.7   | 23.88  | 33.94  | 44.12  | 52.57   | 60.25   | 68.05   | 76.6    | 86.77   | 98.9    | 113.67  |
| Trinidad and Tobago          | Male   | 0    | 0    | 0    | 0    | 0    | 0    | 0    | 0.57 | 3.97  | 10.6   | 21.51  | 35.03  | 49.05  | 61.76  | 71.48   | 80.17   | 86.95   | 95.34   | 104.66  | 115.56  | 127.63  |
| Trinidad and Tobago          | Female | 0    | 0    | 0    | 0    | 0    | 0    | 0    | 0.89 | 6.4   | 19.64  | 41.74  | 70.38  | 100.76 | 127.72 | 147.76  | 164.16  | 177.72  | 191.49  | 205.84  | 223.4   | 243.76  |
| Tunisia                      | Male   | 0    | 0    | 0    | 0    | 0    | 0    | 0    | 0.78 | 5.2   | 14.01  | 27.17  | 42.57  | 57.58  | 69.41  | 78.71   | 85.45   | 91.17   | 96.83   | 103.01  | 111     | 118.32  |
| Tunisia                      | Female | 0    | 0    | 0    | 0    | 0    | 0    | 0    | 1.15 | 8.07  | 24.85  | 54.78  | 94.44  | 134.3  | 166.87 | 190.21  | 203.98  | 214.19  | 223.72  | 233.13  | 244.89  | 259.29  |
| Turkey                       | Male   | 0    | 0    | 0    | 0    | 0    | 0    | 0    | 0.19 | 1.21  | 2.95   | 5.47   | 8.76   | 12.52  | 16.33  | 19.27   | 22.05   | 24.94   | 28.12   | 32.19   | 37.96   | 45.71   |
| Turkey                       | Female | 0    | 0    | 0    | 0    | 0    | 0    | 0    | 0.33 | 2.25  | 6.25   | 13.33  | 23.65  | 35.48  | 46.27  | 55.62   | 62.72   | 68.99   | 75.88   | 84.05   | 94.79   | 109.08  |
| Turkmenistan                 | Male   | 0    | 0    | 0    | 0    | 0    | 0    | 0    | 1.51 | 10.92 | 33     | 67.67  | 109.15 | 149.23 | 185.06 | 211.1   | 229.41  | 242.5   | 253.16  | 261.37  | 270.1   | 278.88  |
| Turkmenistan                 | Female | 0    | 0    | 0    | 0    | 0    | 0    | 0    | 1.26 | 9.29  | 29.66  | 65.82  | 113.42 | 165.58 | 210.43 | 245.62  | 269.71  | 285.84  | 299.19  | 311.27  | 327.4   | 343.53  |
| Uganda                       | Male   | 0    | 0    | 0    | 0    | 0    | 0    | 0    | 1.71 | 11.95 | 34.94  | 68.12  | 103.63 | 134.48 | 158.35 | 174.64  | 185.96  | 194.36  | 203.56  | 211.82  | 221.66  | 231.07  |
| Uganda                       | Female | 0    | 0    | 0    | 0    | 0    | 0    | 0    | 2.15 | 15.9  | 48.74  | 99.63  | 155.71 | 207.51 | 249.51 | 279.81  | 301.12  | 316.52  | 330.8   | 344.8   | 358.84  | 373.39  |
| Ukraine                      | Male   | 0    | 0    | 0    | 0    | 0    | 0    | 0    | 1.21 | 8.59  | 25.44  | 51.07  | 81.08  | 111    | 138.33 | 159.39  | 176.81  | 191.13  | 205.67  | 218.4   | 233.81  | 247.09  |
| Ukraine                      | Female | 0    | 0    | 0    | 0    | 0    | 0    | 0    | 1.83 | 13.69 | 45.35  | 98.99  | 165.61 | 234.86 | 294.45 | 341.18  | 375.44  | 399.28  | 419.57  | 438.36  | 458.81  | 479.43  |
| United Arab Emirates         | Male   | 0    | 0    | 0    | 0    | 0    | 0    | 0    | 0.78 | 5.13  | 13.94  | 26.97  | 42.15  | 56.8   | 69.17  | 78.02   | 84.48   | 90.59   | 96.14   | 102.88  | 110.26  | 117.89  |
| United Arab Emirates         | Female | 0    | 0    | 0    | 0    | 0    | 0    | 0    | 1.14 | 8.08  | 24.63  | 54.96  | 94.05  | 132.74 | 164.99 | 185.37  | 199.44  | 210.19  | 218.47  | 228.59  | 240.97  | 254.94  |
| United Kingdom               | Male   | 0    | 0    | 0    | 0    | 0    | 0    | 0    | 2.2  | 15.05 | 42.97  | 87.72  | 146.33 | 212.31 | 271.51 | 313.77  | 340.04  | 357.35  | 370.1   | 380.25  | 391.49  | 402.16  |
| United Kingdom               | Female | 0    | 0    | 0    | 0    | 0    | 0    | 0    | 2.44 | 18.06 | 58.34  | 129.97 | 223.75 | 319.91 | 398.82 | 452.78  | 488.15  | 511.71  | 528.4   | 540.44  | 553.18  | 565.15  |
| United Republic of Tanzania  | Male   | 0    | 0    | 0    | 0    | 0    | 0    | 0    | 1.7  | 12.05 | 35.33  | 68.49  | 103.9  | 135.56 | 159.36 | 175.79  | 186.92  | 195.14  | 204.37  | 211.75  | 221.07  | 231.24  |
| United Republic of Tanzania  | Female | 0    | 0    | 0    | 0    | 0    | 0    | 0    | 2.17 | 15.73 | 48.94  | 99.58  | 155.25 | 208.08 | 250.52 | 279     | 299.53  | 315.68  | 328.83  | 341.49  | 355.86  | 369.72  |
| United States of America     | Male   | 0    | 0    | 0    | 0    | 0    | 0    | 0    | 5.67 | 34.58 | 78.64  | 148.07 | 261.31 | 408.78 | 539.62 | 610.18  | 637.81  | 647.53  | 650.79  | 654.2   | 660.06  | 658.71  |
| United States of America     | Female | 0    | 0    | 0    | 0    | 0    | 0    | 0    | 8.22 | 53.36 | 140.56 | 304.93 | 562.95 | 826.18 | 989.69 | 1052.42 | 1067.93 | 1066.62 | 1060.24 | 1057.07 | 1055.94 | 1044.92 |
| United States Virgin Islands | Male   | 0    | 0    | 0    | 0    | 0    | 0    | 0    | 0.57 | 3.95  | 10.82  | 21.68  | 35.08  | 49.08  | 61.96  | 72.01   | 80.08   | 87.25   | 95.55   | 104.54  | 114.92  | 126.43  |
| United States Virgin Islands | Female | 0    | 0    | 0    | 0    | 0    | 0    | 0    | 0.89 | 6.32  | 19.6   | 42.15  | 70.72  | 101.16 | 128.55 | 149.01  | 165.57  | 179     | 192.5   | 206.55  | 223.55  | 242.33  |
| Uruguay                      | Male   | 0    | 0    | 0    | 0    | 0    | 0    | 0    | 1.67 | 11.22 | 32.1   | 65.55  | 110.26 | 162.29 | 209.46 | 243.86  | 264.47  | 276.77  | 286.07  | 293.31  | 301.99  | 309.55  |
| Uruguay                      | Female | 0    | 0    | 0    | 0    | 0    | 0    | 0    | 3.91 | 29.76 | 99.09  | 227.39 | 390.43 | 542.69 | 641.03 | 689.65  | 711.45  | 722.79  | 726.97  | 729.46  | 734.26  | 736.48  |
| Uzbekistan                   | Male   | 0    | 0    | 0    | 0    | 0    | 0    | 0    | 1.32 | 9.6   | 28.43  | 58.08  | 93.68  | 129.92 | 161.92 | 186.4   | 203.61  | 215.78  | 225.81  | 235.35  | 243.33  | 251.75  |
| Uzbekistan                   | Female | 0    | 0    | 0    | 0    | 0    | 0    | 0    | 1.97 | 14.87 | 49.57  | 113.12 | 195.34 | 278.65 | 347.38 | 393.73  | 422.91  | 440.01  | 452.23  | 464.49  | 476.31  | 491.27  |
| Vanuatu                      | Male   | 0    | 0    | 0    | 0    | 0    | 0    | 0    | 0.26 | 1.6   | 3.74   | 6.6    | 11.02  | 16.64  | 23.15  | 28.71   | 33.71   | 39.27   | 45.36   | 51.94   | 60.03   | 69.41   |

|                                       |        |   |   |   |   |   |   |      |       |       |        |        |        |        |        |        |        |        |        |        |        |
|---------------------------------------|--------|---|---|---|---|---|---|------|-------|-------|--------|--------|--------|--------|--------|--------|--------|--------|--------|--------|--------|
| Vanuatu                               | Female | 0 | 0 | 0 | 0 | 0 | 0 | 0.46 | 2.97  | 7.65  | 14.47  | 23.6   | 33.86  | 44.08  | 52.3   | 60.28  | 67.71  | 76.62  | 86.24  | 98.05  | 113.66 |
| Venezuela<br>(Bolivarian Republic of) | Male   | 0 | 0 | 0 | 0 | 0 | 0 | 0.22 | 1.5   | 4.07  | 8.23   | 14.24  | 21.03  | 27.66  | 33.11  | 37.88  | 42.68  | 48.09  | 54.04  | 62.08  | 72.54  |
| Venezuela<br>(Bolivarian Republic of) | Female | 0 | 0 | 0 | 0 | 0 | 0 | 0.37 | 2.64  | 7.76  | 17.13  | 30.24  | 45.48  | 59.75  | 71.83  | 81.79  | 91.11  | 101.2  | 112.18 | 126.46 | 144.07 |
| Viet Nam                              | Male   | 0 | 0 | 0 | 0 | 0 | 0 | 0.11 | 0.68  | 1.51  | 2.5    | 3.78   | 5.21   | 6.86   | 8.49   | 10.09  | 12.14  | 14.74  | 17.87  | 22.63  | 28.53  |
| Viet Nam                              | Female | 0 | 0 | 0 | 0 | 0 | 0 | 0.24 | 1.51  | 3.54  | 6.26   | 10     | 14.69  | 19.63  | 24.66  | 28.77  | 33.8   | 39.77  | 47.09  | 56.35  | 68.63  |
| Yemen                                 | Male   | 0 | 0 | 0 | 0 | 0 | 0 | 0.78 | 5.23  | 14.11 | 27.08  | 42.4   | 57.34  | 69.9   | 79.31  | 85.78  | 91.87  | 97.82  | 103.9  | 111.19 | 119.33 |
| Yemen                                 | Female | 0 | 0 | 0 | 0 | 0 | 0 | 1.14 | 7.92  | 24.71 | 53.88  | 93.47  | 133.31 | 166.27 | 188.8  | 203.18 | 213.38 | 221.45 | 231.22 | 243.83 | 256.79 |
| Zambia                                | Male   | 0 | 0 | 0 | 0 | 0 | 0 | 1.7  | 11.84 | 35.07 | 67.55  | 103.09 | 133.97 | 159.23 | 175.83 | 186.67 | 195.13 | 203.57 | 211.88 | 221.64 | 231.27 |
| Zambia                                | Female | 0 | 0 | 0 | 0 | 0 | 0 | 2.15 | 15.84 | 48.94 | 99.13  | 153.46 | 206.34 | 249.63 | 280.04 | 300.54 | 316.11 | 331.26 | 344.55 | 360.22 | 374.21 |
| Zimbabwe                              | Male   | 0 | 0 | 0 | 0 | 0 | 0 | 2.9  | 20.01 | 56.11 | 102.57 | 147.01 | 183.48 | 208.65 | 224.58 | 234.17 | 242.04 | 249.7  | 256.97 | 266.24 | 273.92 |
| Zimbabwe                              | Female | 0 | 0 | 0 | 0 | 0 | 0 | 3.2  | 22.92 | 66.02 | 125.34 | 183.63 | 235.42 | 274.04 | 301.12 | 320.29 | 334.41 | 346.54 | 358.99 | 373.29 | 388.91 |

Supplementary Figures  
Supplementary figure 1.

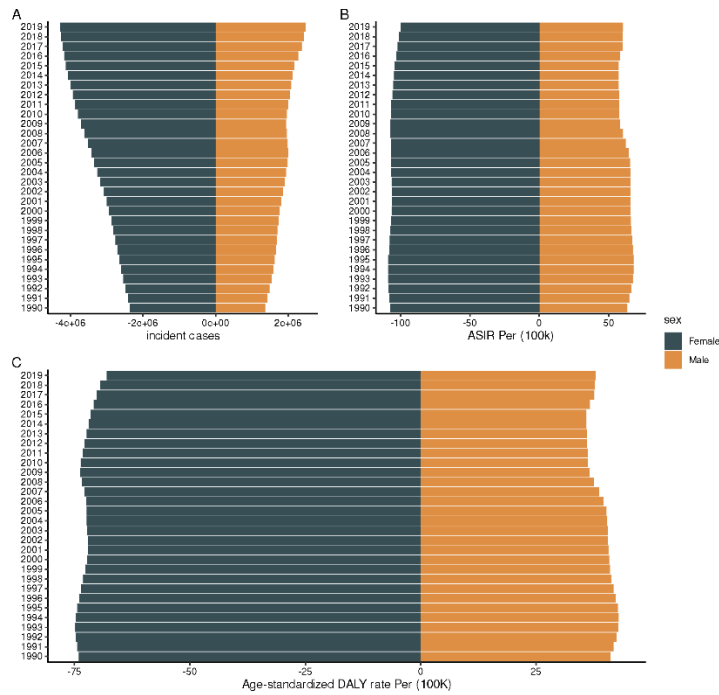

Supplementary figure 1. The incident cases (A), age standardized incidence (B), and age-standardized DALYs (C) rates of hand osteoarthritis between 1990 and 2019 both males and females.

Supplementary figure 2

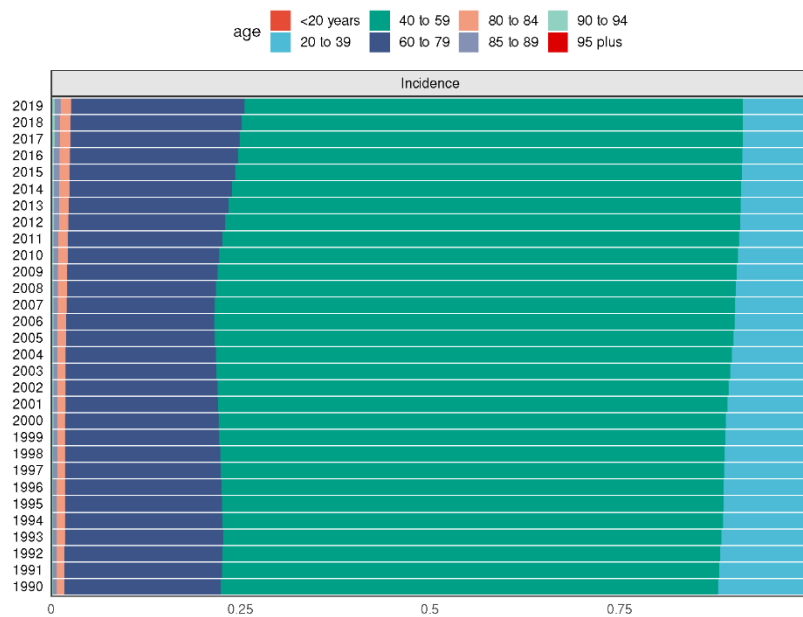

Supplementary figure 2. The proportion of different ages in incidence of hand osteoarthritis by years.

Supplementary figure 3.

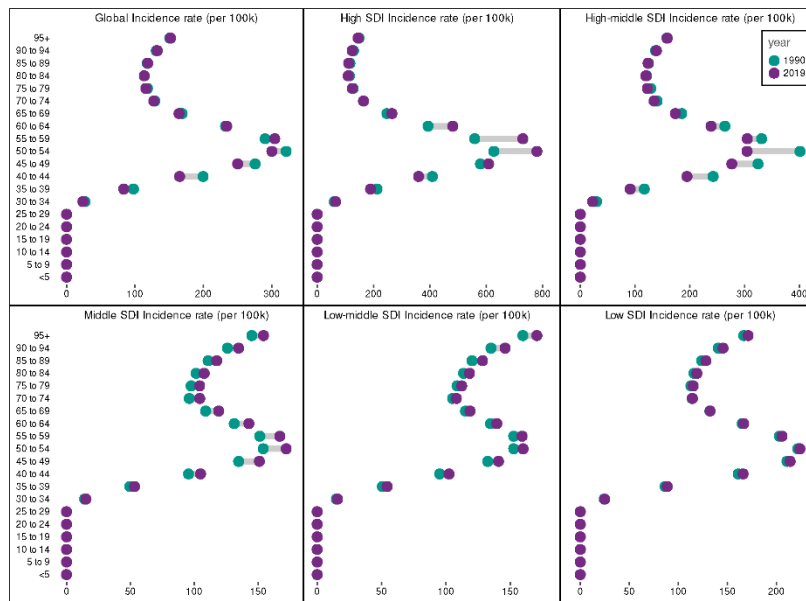

Supplementary figure 3. Distribution of different ages in incidence of hand osteoarthritis in global population.

Supplementary figure 4.

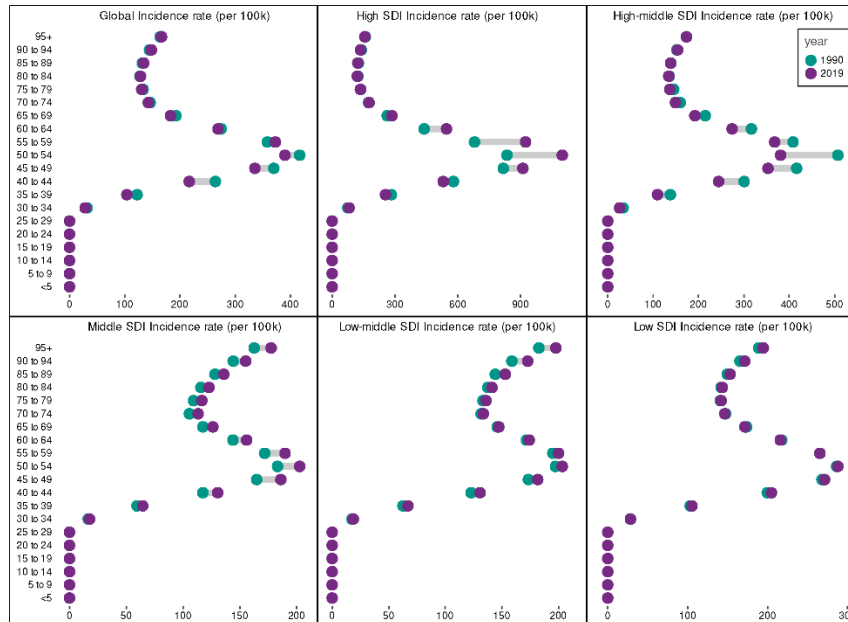

Supplementary figure 4. Distribution of different ages in incidence of hand osteoarthritis in female subjects.

Supplementary figure 5.

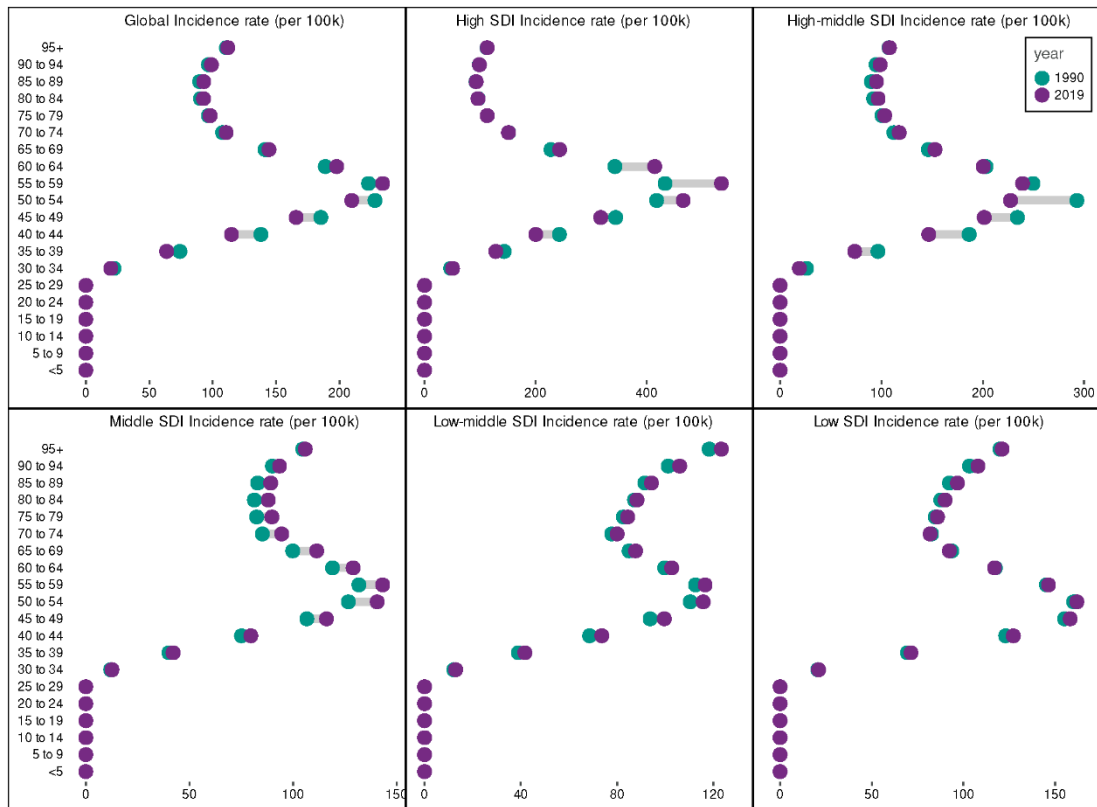

Supplementary figure 5. Distribution of different ages in incidence of hand osteoarthritis in male subjects.

Supplementary figure 6.

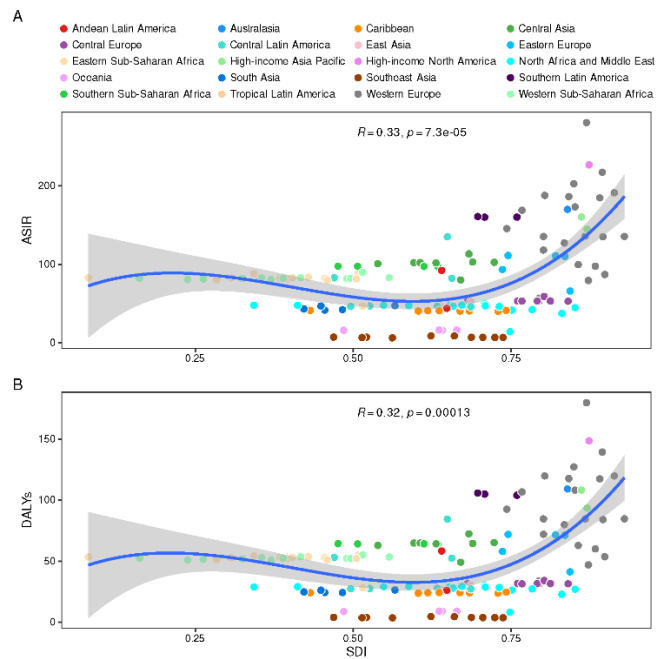

Supplementary figure 6. The age standardized incidence (A) and DALY (B) rates of

hand osteoarthritis per 100,000 population among regions based on SDI in 2019.  
 Supplementary figure 7

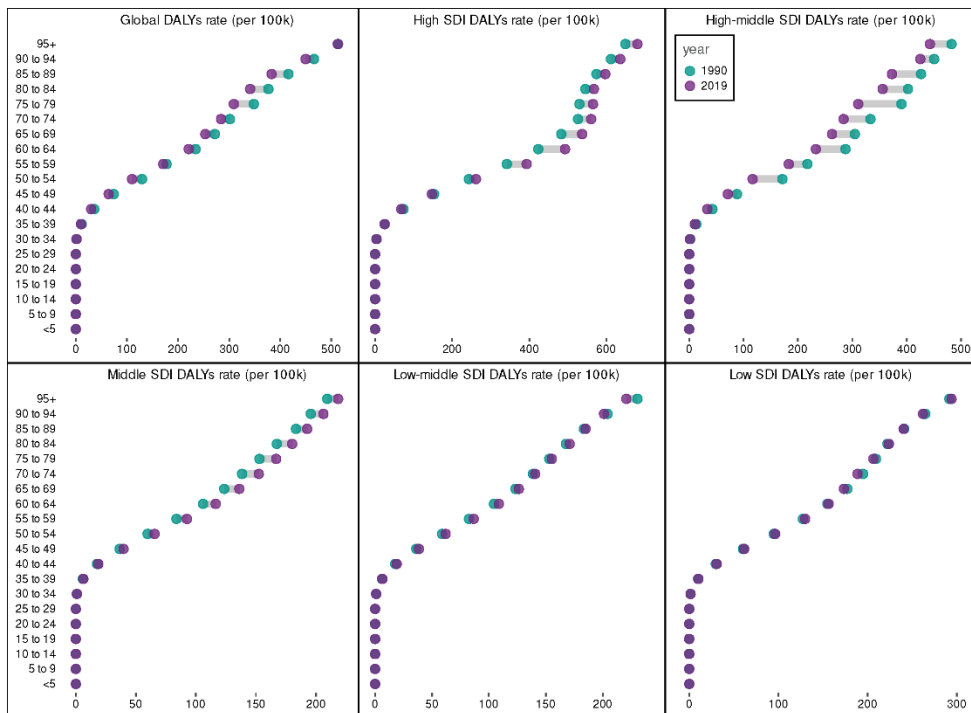

Supplementary figure 7. Distribution of different ages in DALYs of hand osteoarthritis in global level.

Supplementary figure 8.

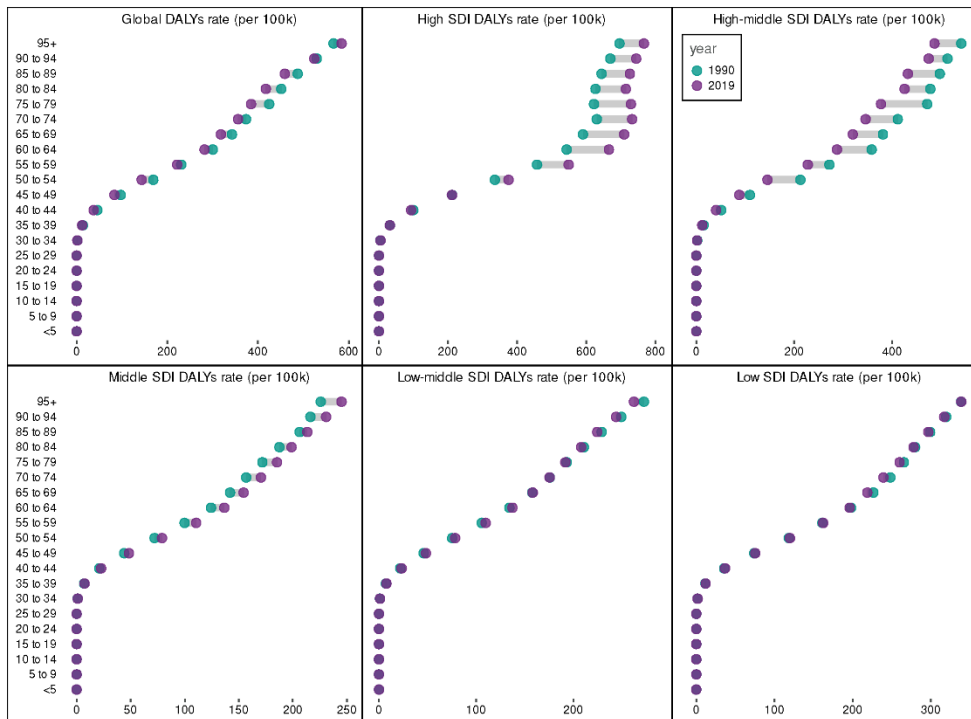

Supplementary figure 8. Distribution of different ages in DALYs of hand osteoarthritis in females.

Supplementary figure 9

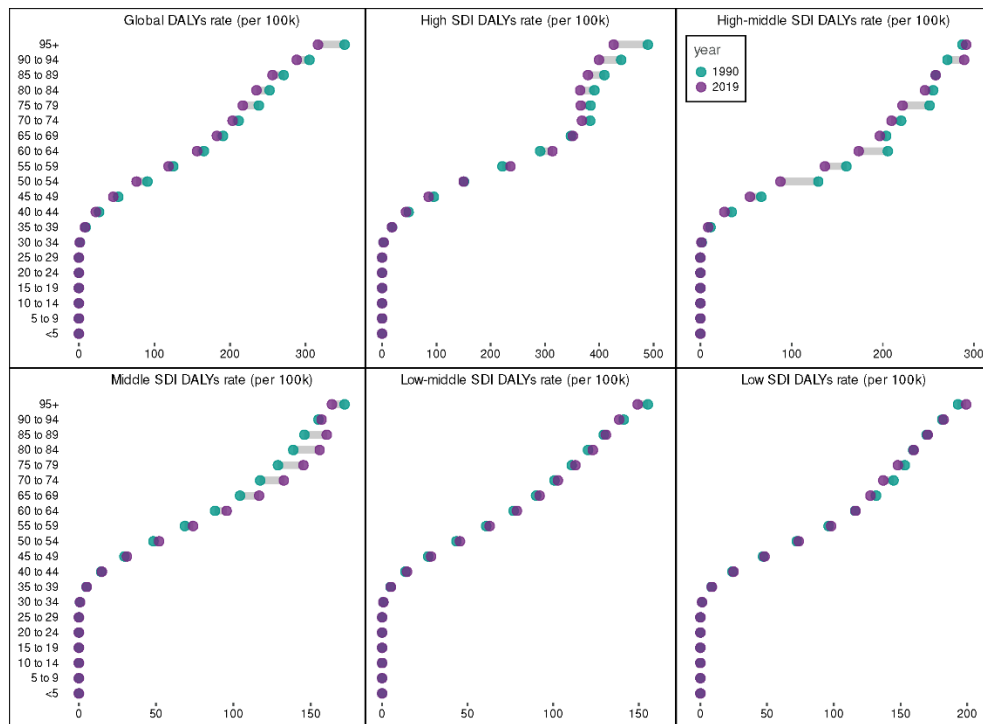

Supplementary figure 9. Distribution of different ages in DALYs of hand osteoarthritis in males.

Supplementary figure 10

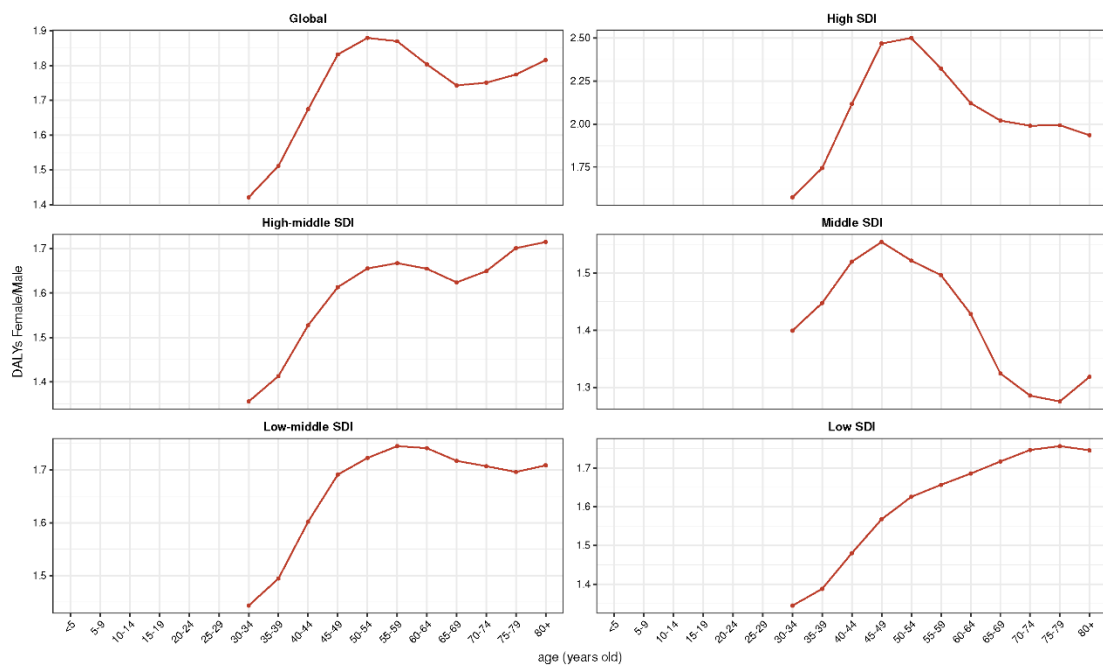

Supplementary figure 10. The ratio of female to male DALYs among different age groups in global. SDI, socio-demographic index.
